# Supplementary material for: Identification of bZIP Transcription Factors That Regulate the Development of Leaf Epidermal Cells in Arabidopsis thaliana by Single-Cell RNA Sequencing
Source: Int J Mol Sci. 2024 Feb 22;25(5):2553. doi: 10.3390/ijms25052553 (PMC10931525; doi:10.3390/ijms25052553)
Supplement: Supplementary file 1 [file ijms-25-02553-s001.zip › ijms-2843778-supplementary Tables-IJMS.xlsx]

## Sheet: Table S1. All_DEGs_
Table S1. All_DEGs_for_all_clsuters_tSNE
GeneID	gene	p_val	avg_logFC	pct.1	pct.2	p_val_adj	cluster	gene_diff
AT2G34420	LHB1B2	0	1.78396	0.966	0.818	0	0	1.18093
AT1G29910	LHCB1.1	0	1.77794	0.886	0.618	0	0	1.43366
AT1G29920	LHCB1.1.1	0	1.72046	0.767	0.521	0	0	1.47217
AT2G34430	LHB1B1	0	1.63106	0.885	0.59	0	0	1.5
AT1G29930	LHCB1.3	0	1.60733	0.999	0.984	0	0	1.01524
AT3G47470	LHCA4	0	1.57996	0.938	0.679	0	0	1.38144
AT3G54890	LHCA1	0	1.48419	0.991	0.83	0	0	1.19398
AT4G10340	LHCB5	0	1.3346	0.986	0.783	0	0	1.25926
AT1G31330	PSAF	0	1.31477	0.994	0.86	0	0	1.15581
AT1G61520	LHCA3	0	1.31063	0.987	0.804	0	0	1.22761
AT3G61470	LHCA2	0	1.26533	0.999	0.94	0	0	1.06277
AT1G08380	PSAO	0	1.25222	0.98	0.68	0	0	1.44118
AT5G38410	AT5G38410	0	1.24912	1	0.982	0	0	1.01833
AT1G67090	RBCS-1A	0	1.23519	1	0.989	0	0	1.01112
AT4G26530	FBA5	0	1.20749	0.919	0.49	0	0	1.87551
AT1G55670	PSAG	0	1.20561	0.991	0.827	0	0	1.19831
AT5G54770	THI1	0	1.20085	0.997	0.916	0	0	1.08843
AT5G02160	AT5G02160	0	1.19711	0.964	0.532	0	0	1.81203
AT1G15820	LHCB6	0	1.18412	0.864	0.435	0	0	1.98621
AT1G30380	PSAK	0	1.18323	0.963	0.598	0	0	1.61037
AT5G66570	PSBO1	0	1.16922	0.998	0.906	0	0	1.10155
AT2G13360	AGT1	0	1.16729	0.96	0.54	0	0	1.77778
AT3G01500	BCA1	0	1.15744	0.99	0.829	0	0	1.19421
AT2G20260	PSAE2	0	1.15597	0.98	0.693	0	0	1.41414
AT1G72610	GLP1.1	0	1.15494	0.893	0.38	0	0	2.35
AT1G06680	PSBP1	0	1.13507	0.97	0.673	0	0	1.44131
AT4G02770	PSAD1	0	1.12563	0.94	0.5	0	0	1.88
AT5G54270	LHCB3	0	1.12171	0.545	0.248	0	0	2.19758
AT4G28750	PSAE1	0	1.12137	0.982	0.727	0	0	1.35076
AT1G79040	PSBR	0	1.10776	1	0.999	0	0	1.001
AT1G20340	DRT112	0	1.10405	0.991	0.882	0	0	1.12358
AT2G10940	AT2G10940	0	1.101	0.856	0.267	0	0	3.20599
AT5G01530	LHCB4.1	0	1.09765	0.999	0.953	0	0	1.04827
AT5G38420	RBCS-2B	0	1.09765	0.901	0.559	0	0	1.61181
AT2G33830	DRMH1	0	1.09307	0.825	0.42	0	0	1.96429
AT2G21660	RBG7	0	1.08336	0.85	0.551	0	0	1.54265
AT2G45180	AT2G45180	0	1.07014	0.89	0.438	0	0	2.03196
AT1G12090	ELP	0	1.06301	0.715	0.175	0	0	4.08571
AT3G26650	GAPA1	0	1.0554	0.991	0.8	0	0	1.23875
AT3G21055	PSBTN	0	1.05361	0.952	0.546	0	0	1.74359
AT4G21280	PSBQ1	0	1.05022	0.975	0.653	0	0	1.49311
AT1G29070	RPL34	0	1.04856	0.973	0.671	0	0	1.45007
AT3G27850	RPL12C.1	0	1.04819	0.955	0.552	0	0	1.73007
AT5G64040	PSAN	0	1.04809	0.911	0.463	0	0	1.9676
AT3G08940	LHCB4.2	0	1.04465	0.575	0.191	0	0	3.01047
AT3G14415	AT3G14415	0	1.04404	0.96	0.569	0	0	1.68717
AT2G39730	RCA	0	1.04151	0.983	0.78	0	0	1.26026
AT3G14420	GLO1	0	1.03765	0.98	0.684	0	0	1.43275
AT4G12800	PSAL	0	1.02762	0.98	0.699	0	0	1.402
AT4G03280	PETC	0	1.02606	0.992	0.822	0	0	1.20681
AT1G44575	PSBS	0	1.02503	0.968	0.658	0	0	1.47112
AT1G13930	AT1G13930	0	1.02275	0.852	0.455	0	0	1.87253
AT5G38430	RBCS-1B	0	1.01371	0.927	0.573	0	0	1.6178
AT4G05180	PSBQ2	0	1.00745	0.893	0.44	0	0	2.02955
AT5G09660	PMDH2	0	1.00732	0.942	0.502	0	0	1.87649
AT5G14320	RPS13.1	0	1.00051	0.953	0.56	0	0	1.70179
AT4G38970	FBA2	0	0.999576	0.991	0.793	0	0	1.24968
AT1G03600	PSB27-1	0	0.986569	0.902	0.431	0	0	2.09281
AT3G16140	PSAH1	0	0.983993	0.964	0.608	0	0	1.58553
AT3G15360	ATHM4	0	0.983529	0.96	0.576	0	0	1.66667
AT1G68010	HPR	0	0.983021	0.964	0.586	0	0	1.64505
AT3G05500	AT3G05500	0	0.982781	0.963	0.815	0	0	1.1816
AT2G06520	PSBX	0	0.980616	0.933	0.541	0	0	1.72458
AT2G41100	CML12	0	0.977677	0.967	0.658	0	0	1.4696
AT1G28330	DRM1	0	0.977348	0.967	0.662	0	0	1.46073
AT1G42970	GAPB	0	0.973418	0.984	0.769	0	0	1.27958
AT2G46820	CURT1B	0	0.973318	0.977	0.67	0	0	1.45821
AT3G63160	AT3G63160	0	0.973044	0.954	0.6	0	0	1.59
AT1G05190	RPL6	0	0.965532	0.971	0.626	0	0	1.55112
AT1G20020	LFNR2	0	0.964786	0.98	0.707	0	0	1.38614
AT1G78630	RPL13	0	0.96452	0.963	0.625	0	0	1.5408
AT3G12780	PGK1	0	0.963448	0.945	0.569	0	0	1.66081
AT1G03680	ATHM1	0	0.963342	0.93	0.457	0	0	2.03501
AT1G11860	AT1G11860	0	0.957941	0.923	0.443	0	0	2.08352
AT2G43030	RPL3A	0	0.941433	0.899	0.47	0	0	1.91277
AT2G37220	CP29B	0	0.93451	0.964	0.639	0	0	1.50861
AT1G09340	CRB.1	0	0.934447	0.937	0.487	0	0	1.92402
AT1G12900	GAPA-2	0	0.932018	0.897	0.413	0	0	2.17191
AT5G24490	AT5G24490	0	0.926804	0.878	0.38	0	0	2.31053
AT1G60950	FD2	0	0.926404	0.951	0.656	0	0	1.4497
AT4G32260	AT4G32260	0	0.926187	0.988	0.769	0	0	1.28479
AT1G48350	RPL18	0	0.920111	0.922	0.499	0	0	1.8477
AT3G27830	RPL12A	0	0.913175	0.88	0.445	0	0	1.97753
AT3G53460	CP29	0	0.911783	0.922	0.538	0	0	1.71375
AT5G14740	BCA2	0	0.906564	0.997	0.953	0	0	1.04617
AT1G75380	BBD1	0	0.905202	0.833	0.316	0	0	2.63608
AT5G65220	RPL29	0	0.903841	0.965	0.61	0	0	1.58197
AT2G30570	PSBW	0	0.902614	0.988	0.84	0	0	1.17619
AT4G04640	ATPC1	0	0.893637	0.894	0.397	0	0	2.25189
AT1G32060	PRK	0	0.890306	0.859	0.316	0	0	2.71835
AT4G34620	RPS16-1	0	0.8806	0.998	0.913	0	0	1.0931
AT1G35680	RPL21	0	0.878163	0.893	0.42	0	0	2.12619
AT1G32470	GDH3	0	0.873299	0.945	0.575	0	0	1.64348
AT3G47070	AT3G47070	0	0.872954	0.871	0.418	0	0	2.08373
AT2G38140	RPS31	0	0.868075	0.939	0.55	0	0	1.70727
AT3G47340	ASN1	0	0.866803	0.746	0.33	0	0	2.26061
AT3G25920	RPL15	0	0.866374	0.952	0.629	0	0	1.51351
AT4G37930	SHM1	0	0.861008	0.945	0.579	0	0	1.63212
AT3G54210	RPL17	0	0.855699	0.957	0.654	0	0	1.4633
AT1G21500	AT1G21500	0	0.8444	0.761	0.229	0	0	3.32314
AT5G03210	AT5G03210	0	0.842694	0.906	0.663	0	0	1.36652
AT4G01150	CURT1A	0	0.842337	0.995	0.89	0	0	1.11798
AT4G25080	CHLM	0	0.842081	0.894	0.424	0	0	2.10849
AT3G63490	RPL1	0	0.841292	0.923	0.534	0	0	1.72846
AT2G28900	OEP161	0	0.841255	0.93	0.57	0	0	1.63158
AT2G24090	RPL35	0	0.840398	0.921	0.496	0	0	1.85685
AT4G20360	TUFA.1	0	0.839987	0.899	0.459	0	0	1.95861
AT1G16880	ACR11	0	0.837557	0.828	0.289	0	0	2.86505
AT5G20630	GER3	0	0.835338	0.619	0.176	0	0	3.51705
AT3G46780	PTAC16	0	0.834273	0.858	0.362	0	0	2.37017
AT2G06850	XTH4	0	0.8328	0.818	0.249	0	0	3.28514
AT3G54050	CFBP1	0	0.832596	0.845	0.324	0	0	2.60802
AT3G56910	PSRP5	0	0.826257	0.95	0.583	0	0	1.6295
AT2G33800	RPS5.1	0	0.823336	0.88	0.398	0	0	2.21106
AT4G25050	ACP4	0	0.821584	0.952	0.601	0	0	1.58403
AT5G17870	PSRP6	0	0.819248	0.948	0.578	0	0	1.64014
AT4G01310	RPL5	0	0.81558	0.926	0.5	0	0	1.852
AT2G26500	AT2G26500	0	0.815394	0.993	0.864	0	0	1.14931
AT1G14150	PNSL2	0	0.814132	0.761	0.193	0	0	3.94301
AT1G67740	PSBY	0	0.81186	0.927	0.565	0	0	1.64071
AT2G21330	FBA1	0	0.810316	0.869	0.465	0	0	1.86882
AT1G23310	GGAT1	0	0.808588	0.984	0.759	0	0	1.29644
AT3G15190	RPS20	0	0.79782	0.893	0.452	0	0	1.97566
AT3G62030	ROC4	0	0.795609	0.941	0.617	0	0	1.52512
AT4G24770	CP31A	0	0.794949	0.975	0.722	0	0	1.35042
AT2G04700	FTRC	0	0.789202	0.909	0.497	0	0	1.82897
AT1G52230	PSAH2	0	0.788993	0.774	0.315	0	0	2.45714
AT5G19940	PAP8	0	0.788451	0.837	0.386	0	0	2.16839
AT1G51400	AT1G51400	0	0.788266	0.786	0.29	0	0	2.71034
AT5G65207	AT5G65207	0	0.786907	0.768	0.352	0	0	2.18182
AT3G56940	CRD1	0	0.785799	0.721	0.288	0	0	2.50347
AT5G07020	MPH1	0	0.784812	0.829	0.336	0	0	2.46726
AT5G59550	AT5G59550	0	0.783012	0.927	0.597	0	0	1.55276
AT5G66190	LFNR1	0	0.782534	0.923	0.488	0	0	1.89139
AT5G47190	AT5G47190	0	0.782014	0.82	0.322	0	0	2.54658
AT1G45474	LHCA5	0	0.7794	0.834	0.333	0	0	2.5045
AT1G75860	AT1G75860	0	0.775163	0.671	0.307	0	0	2.18567
AT1G67700	HHL1	0	0.773482	0.93	0.518	0	0	1.79537
AT5G46110	APE2	0	0.770466	0.884	0.41	0	0	2.1561
AT3G63410	VTE3	0	0.765958	0.886	0.438	0	0	2.02283
AT1G53170	ERF8	0	0.765645	0.642	0.208	0	0	3.08654
AT3G02730	TRXF1	0	0.762896	0.789	0.264	0	0	2.98864
AT3G50820	PSBO2	0	0.761654	0.858	0.404	0	0	2.12376
AT2G43560	FKBP16-3	0	0.756933	0.859	0.393	0	0	2.18575
AT5G41700	UBC8	0	0.755846	0.982	0.808	0	0	1.21535
AT4G28660	PSB28	0	0.751871	0.81	0.312	0	0	2.59615
AT1G70760	ndhL	0	0.750813	0.789	0.275	0	0	2.86909
AT3G63140	CSP41A	0	0.750295	0.778	0.289	0	0	2.69204
AT4G22890	PGRL1A	0	0.75024	0.873	0.417	0	0	2.09353
AT4G04330	RBCX1	0	0.745223	0.728	0.173	0	0	4.20809
AT1G74970	RPS9	0	0.744949	0.953	0.594	0	0	1.60438
AT1G64510	AT1G64510	0	0.74421	0.893	0.465	0	0	1.92043
AT1G74470	CHLP	0	0.743914	0.821	0.389	0	0	2.11054
AT4G39710	PNSL4	0	0.743684	0.829	0.339	0	0	2.44543
AT5G14910	AT5G14910	0	0.740295	0.901	0.462	0	0	1.95022
AT5G35630	GLN2	0	0.739273	0.988	0.795	0	0	1.24277
AT1G56220	AT1G56220	0	0.732073	0.83	0.392	0	0	2.11735
AT3G56090	FER3	0	0.731706	0.631	0.232	0	0	2.71983
AT1G79850	RPS17	0	0.728995	0.87	0.449	0	0	1.93764
AT1G32990	RPL11	0	0.728698	0.83	0.36	0	0	2.30556
AT5G06290	2-Cys Prx B	0	0.728602	0.801	0.334	0	0	2.3982
AT3G55330	PPL1	0	0.727292	0.84	0.36	0	0	2.33333
AT3G27160	GHS1	0	0.726804	0.922	0.59	0	0	1.56271
AT4G27800	PPH1	0	0.726196	0.851	0.365	0	0	2.33151
AT3G51510	AT3G51510	0	0.72432	0.79	0.26	0	0	3.03846
AT4G09010	APX4	0	0.719194	0.764	0.284	0	0	2.69014
AT3G11630	BAS1	0	0.716722	0.957	0.659	0	0	1.4522
AT1G43670	CYFBP	0	0.716344	0.803	0.342	0	0	2.34795
AT4G10300	AT4G10300	0	0.714032	0.895	0.461	0	0	1.94143
AT5G30510	RPS1	0	0.713993	0.907	0.516	0	0	1.75775
AT5G10695	AT5G10695	0	0.712924	0.937	0.668	0	0	1.40269
AT1G73655	FKBP17-3	0	0.71026	0.749	0.208	0	0	3.60096
AT5G54600	RPL24	0	0.709083	0.896	0.503	0	0	1.78131
AT2G35370	GDH1.1	0	0.707228	0.941	0.597	0	0	1.57621
AT1G07320	RPL4	0	0.706396	0.85	0.405	0	0	2.09877
AT4G34190	SEP1.1	0	0.706115	0.911	0.512	0	0	1.7793
AT1G75690	LQY1	0	0.705844	0.796	0.332	0	0	2.39759
AT5G40950	RPL27	0	0.705105	0.854	0.441	0	0	1.93651
AT1G54780	TLP18.3	0	0.701319	0.728	0.204	0	0	3.56863
AT1G32928	AT1G32928	0	0.697546	0.906	0.561	0	0	1.61497
AT5G38660	APE1	0	0.696072	0.776	0.317	0	0	2.44795
AT3G26060	ATPRX Q	0	0.692751	0.876	0.46	0	0	1.90435
AT3G15840	PIFI	0	0.689404	0.797	0.333	0	0	2.39339
AT2G20890	THF1	0	0.685437	0.769	0.28	0	0	2.74643
AT3G18780	ACT2	0	0.681829	0.956	0.674	0	0	1.4184
AT4G03520	ATHM2	0	0.679643	0.918	0.571	0	0	1.60771
AT3G03150	AT3G03150	0	0.670338	0.824	0.367	0	0	2.24523
AT4G34150	AT4G34150	0	0.667181	0.922	0.577	0	0	1.59792
AT3G55800	SBPASE	0	0.665601	0.867	0.422	0	0	2.0545
AT4G17490	ERF6	0	0.665504	0.736	0.309	0	0	2.38188
AT2G33450	RPL28	0	0.66493	0.883	0.496	0	0	1.78024
AT3G15630	AT3G15630	0	0.664796	0.771	0.374	0	0	2.0615
AT4G13395	DVL10	0	0.663449	0.814	0.445	0	0	1.82921
AT5G45680	FKBP13	0	0.660279	0.714	0.204	0	0	3.5
AT1G75350	RPL31	0	0.660159	0.917	0.557	0	0	1.64632
AT3G44890	RPL9	0	0.656658	0.86	0.455	0	0	1.89011
AT4G23570	SGT1A	0	0.655673	0.664	0.291	0	0	2.28179
AT4G20260	PCAP1	0	0.655178	0.887	0.513	0	0	1.72904
AT5G13510	RPL10	0	0.655069	0.761	0.307	0	0	2.47883
AT1G31580	ECS1	0	0.650346	0.55	0.2	0	0	2.75
AT2G34860	PSA2	0	0.646873	0.87	0.439	0	0	1.98178
AT1G32920	AT1G32920	0	0.641192	0.997	0.967	0	0	1.03102
AT2G45680	TCP9	0	0.640762	0.658	0.267	0	0	2.46442
AT2G39470	PNSL1	0	0.640669	0.805	0.321	0	0	2.50779
AT2G41430	ERD15	0	0.640581	0.999	0.976	0	0	1.02357
AT5G24314	PTAC7	0	0.637472	0.734	0.232	0	0	3.16379
AT3G59350	AT3G59350	0	0.631868	0.918	0.594	0	0	1.54545
AT1G18730	PNSB4	0	0.631835	0.799	0.332	0	0	2.40663
AT3G47650	AT3G47650	0	0.631779	0.867	0.46	0	0	1.88478
AT2G27680	AT2G27680	0	0.630692	0.826	0.397	0	0	2.0806
AT1G71500	AT1G71500	0	0.630416	0.95	0.652	0	0	1.45706
AT5G23120	HCF136	0	0.629636	0.915	0.54	0	0	1.69444
AT4G30950	FAD6	0	0.627783	0.894	0.533	0	0	1.6773
AT3G48420	CBBY	0	0.618423	0.807	0.345	0	0	2.33913
AT2G21170	TIM	0	0.610369	0.906	0.537	0	0	1.68715
AT5G63310	NDPK2	0	0.607622	0.838	0.446	0	0	1.87892
AT1G64680	AT1G64680	0	0.607316	0.785	0.327	0	0	2.40061
AT5G53490	AT5G53490	0	0.606782	0.734	0.25	0	0	2.936
AT4G32340	AT4G32340	0	0.605404	0.691	0.217	0	0	3.18433
AT2G28000	CPN60A1	0	0.603691	0.766	0.38	0	0	2.01579
AT4G29905	AT4G29905	0	0.603289	0.539	0.167	0	0	3.22754
AT2G39570	ACR9	0	0.597225	0.872	0.517	0	0	1.68665
AT1G03130	PSAD2	0	0.595591	0.527	0.158	0	0	3.33544
AT1G74880	ndhO	0	0.594872	0.845	0.414	0	0	2.04106
AT2G05310	AT2G05310	0	0.590151	0.75	0.279	0	0	2.68817
AT3G16640	TCTP1	0	0.587316	0.992	0.897	0	0	1.10591
AT2G31040	CGL160	0	0.585166	0.641	0.172	0	0	3.72674
AT3G52150	PSRP2	0	0.580379	0.677	0.266	0	0	2.54511
AT5G38520	AT5G38520	0	0.579925	0.682	0.215	0	0	3.17209
AT4G37300	MEE59	0	0.5794	0.776	0.36	0	0	2.15556
AT5G61410	RPE	0	0.578646	0.942	0.646	0	0	1.4582
AT1G19150	LHCA6	0	0.573089	0.615	0.153	0	0	4.01961
AT2G28800	ALB3	0	0.572972	0.825	0.419	0	0	1.96897
AT3G13120	RPS10	0	0.572596	0.728	0.313	0	0	2.32588
AT4G13500	AT4G13500	0	0.568121	0.63	0.155	0	0	4.06452
AT4G12720	AtNUDT7	0	0.567988	0.59	0.226	0	0	2.61062
AT1G08980	AMI1	0	0.564411	0.767	0.334	0	0	2.29641
AT1G74730	AT1G74730	0	0.558797	0.63	0.181	0	0	3.48066
AT3G61640	AGP20	0	0.557725	0.732	0.295	0	0	2.48136
AT5G16710	DHAR3	0	0.557711	0.773	0.326	0	0	2.37117
AT5G52970	AT5G52970	0	0.556625	0.652	0.176	0	0	3.70455
AT4G34410	ERF109	0	0.554954	0.613	0.178	0	0	3.44382
AT5G43750	PNSB5	0	0.554855	0.715	0.258	0	0	2.77132
AT5G51010	AT5G51010	0	0.554302	0.646	0.212	0	0	3.04717
AT2G36835	AT2G36835	0	0.552431	0.799	0.413	0	0	1.93462
AT5G44070	PCS1.1	0	0.551297	0.673	0.25	0	0	2.692
AT1G19660	BBD2	0	0.550119	0.789	0.377	0	0	2.09284
AT4G31290	GGCT2;2	0	0.548135	0.828	0.468	0	0	1.76923
AT3G60750	TKL-1	0	0.547828	0.744	0.367	0	0	2.02725
AT3G52960	PRXIIE	0	0.544949	0.822	0.449	0	0	1.83073
AT2G29630	THIC	0	0.544935	0.659	0.243	0	0	2.71193
AT1G34000	OHP2	0	0.543714	0.756	0.364	0	0	2.07692
AT3G26740	CCL	0	0.543106	0.732	0.351	0	0	2.08547
AT4G02530	AT4G02530	0	0.542749	0.723	0.284	0	0	2.54577
AT5G13190	AT5G13190	0	0.538946	0.884	0.582	0	0	1.5189
AT3G51820	CHLG	0	0.538232	0.758	0.34	0	0	2.22941
AT5G51110	ATP1	0	0.537145	0.833	0.41	0	0	2.03171
AT4G35450	AKR2	0	0.534999	0.869	0.486	0	0	1.78807
AT1G55480	ZKT	0	0.534122	0.713	0.252	0	0	2.82937
AT1G08930	ERD6	0	0.534117	0.862	0.468	0	0	1.84188
AT1G69840	HIR2	0	0.533924	0.762	0.456	0	0	1.67105
AT1G33810	AT1G33810	0	0.533392	0.76	0.34	0	0	2.23529
AT2G36145	AT2G36145	0	0.531274	0.588	0.16	0	0	3.675
AT1G29390	COR413IM2	0	0.528167	0.667	0.23	0	0	2.9
AT2G31810	AT2G31810	0	0.527843	0.826	0.452	0	0	1.82743
AT4G30690	IF3-4	0	0.524278	0.585	0.147	0	0	3.97959
AT3G12345	AT3G12345	0	0.523998	0.712	0.299	0	0	2.38127
AT1G65260	VIPP1	0	0.521154	0.82	0.433	0	0	1.89376
AT2G37660	AT2G37660	0	0.517694	0.645	0.235	0	0	2.74468
AT5G09650	PPA6	0	0.517653	0.768	0.391	0	0	1.96419
AT3G61870	AT3G61870	0	0.517042	0.663	0.234	0	0	2.83333
AT3G26580	AT3G26580	0	0.514977	0.715	0.311	0	0	2.29904
AT4G35250	AT4G35250	0	0.514929	0.652	0.263	0	0	2.47909
AT2G01110	TATC	0	0.512923	0.735	0.351	0	0	2.09402
AT4G01050	TROL	0	0.507538	0.721	0.291	0	0	2.47766
AT4G17600	LIL3.1	0	0.506526	0.589	0.165	0	0	3.5697
AT5G21920	YLMG2	0	0.506141	0.653	0.2	0	0	3.265
AT1G50320	ATHX	0	0.504384	0.881	0.535	0	0	1.64673
AT2G44920	AT2G44920	0	0.504056	0.675	0.255	0	0	2.64706
AT1G43560	Aty2	0	0.503365	0.72	0.314	0	0	2.29299
AT1G68590	AT1G68590	0	0.502396	0.56	0.162	0	0	3.45679
AT3G19820	DIM	0	0.502194	0.704	0.268	0	0	2.62687
AT3G08740	AT3G08740	0	0.501757	0.735	0.339	0	0	2.16814
ATCG00820	RPS19.1	0	0.50094	0.975	0.816	0	0	1.19485
AT1G03630	PORC	0	0.500646	0.563	0.142	0	0	3.96479
AT2G24060	IF3-2	0	0.50055	0.67	0.236	0	0	2.83898
AT5G64460	AT5G64460	0	0.49918	0.669	0.24	0	0	2.7875
AT1G76450	PPD3	0	0.497511	0.697	0.288	0	0	2.42014
AT5G20720	CPN20	0	0.497071	0.911	0.615	0	0	1.4813
AT3G26070	PAP4	0	0.490552	0.68	0.274	0	0	2.48175
AT3G32930	AT3G32930	0	0.489245	0.668	0.243	0	0	2.74897
AT5G03880	AT5G03880	0	0.488905	0.874	0.514	0	0	1.70039
AT5G21430	ndhU	0	0.488409	0.752	0.338	0	0	2.22485
AT1G01170	AT1G01170	0	0.48658	0.702	0.266	0	0	2.6391
AT2G24020	STIC2	0	0.485559	0.769	0.386	0	0	1.99223
AT1G28150	AT1G28150	0	0.484644	0.718	0.332	0	0	2.16265
AT2G29310	AT2G29310	0	0.482896	0.518	0.102	0	0	5.07843
AT2G44650	CPN10-2	0	0.48196	0.738	0.363	0	0	2.03306
AT4G39040	AT4G39040	0	0.481841	0.66	0.248	0	0	2.66129
AT2G47060	AT2G47060	0	0.480751	0.62	0.2	0	0	3.1
AT3G63190	RRF	0	0.479816	0.686	0.269	0	0	2.55019
AT3G61260	AT3G61260	0	0.479167	0.94	0.628	0	0	1.49682
AT5G19220	ADG2	0	0.478947	0.697	0.278	0	0	2.50719
AT5G20250	DIN10	0	0.476516	0.819	0.494	0	0	1.65789
AT3G12120	FAD2	0	0.476493	0.874	0.533	0	0	1.63977
AT1G12410	CLPR2	0	0.475713	0.819	0.469	0	0	1.74627
ATCG00350	PSAA	0	0.475421	0.988	0.872	0	0	1.13303
AT1G42960	AT1G42960	0	0.475309	0.862	0.505	0	0	1.70693
AT4G27440	PORB	0	0.475009	0.399	0.086	0	0	4.63953
AT4G21860	MSRB2	0	0.472843	0.837	0.479	0	0	1.74739
AT3G14110	FLU	0	0.472651	0.667	0.261	0	0	2.55556
AT4G26555	FKBP16-1	0	0.470356	0.621	0.19	0	0	3.26842
AT4G26670	TIM22-2	0	0.467858	0.521	0.117	0	0	4.45299
AT3G49470	NACA2	0	0.467027	0.565	0.141	0	0	4.00709
AT2G46330	AGP16	0	0.466652	0.867	0.498	0	0	1.74096
AT5G08330	TCP21	0	0.465135	0.452	0.067	0	0	6.74627
AT2G34770	FAH1	0	0.464602	0.809	0.387	0	0	2.09044
AT4G24750	STR11	0	0.463767	0.579	0.181	0	0	3.1989
AT5G35170	AT5G35170	0	0.462647	0.604	0.205	0	0	2.94634
AT1G52220	CURT1C	0	0.462202	0.604	0.165	0	0	3.66061
AT5G26742	RH3	0	0.462115	0.665	0.29	0	0	2.2931
AT4G18480	CHLI1	0	0.460994	0.553	0.162	0	0	3.41358
AT1G56190	AT1G56190	0	0.459462	0.665	0.296	0	0	2.24662
AT5G47840	AMK2	0	0.457698	0.712	0.332	0	0	2.14458
AT4G36530	AT4G36530	0	0.457556	0.538	0.112	0	0	4.80357
AT3G01480	CYP38	0	0.456012	0.614	0.205	0	0	2.99512
AT3G14930	HEME1	0	0.453588	0.572	0.189	0	0	3.02646
AT2G47400	CP12-1	0	0.450733	0.977	0.772	0	0	1.26554
AT2G15890	MEE14	0	0.450509	0.649	0.31	0	0	2.09355
AT1G22700	PYG7	0	0.445464	0.55	0.146	0	0	3.76712
AT5G13650	AT5G13650	0	0.443967	0.839	0.513	0	0	1.63548
AT3G08030	AT3G08030	0	0.440994	0.523	0.131	0	0	3.99237
AT5G08050	AT5G08050	0	0.440327	0.603	0.228	0	0	2.64474
AT4G17040	CLPR4	0	0.439889	0.802	0.467	0	0	1.71734
AT1G10360	GSTU18	0	0.439288	0.625	0.255	0	0	2.45098
AT4G28030	AT4G28030	0	0.437951	0.575	0.189	0	0	3.04233
AT5G44580	AT5G44580	0	0.437823	0.7	0.342	0	0	2.04678
AT2G27290	AT2G27290	0	0.437055	0.69	0.308	0	0	2.24026
AT5G19190	AT5G19190	0	0.436835	0.37	0.065	0	0	5.69231
AT4G16410	AT4G16410	0	0.43516	0.611	0.251	0	0	2.43426
AT1G78020	FLZ6	0	0.435102	0.522	0.161	0	0	3.24224
AT3G52380	CP33	0	0.430311	0.667	0.301	0	0	2.21595
AT5G01920	STN8	0	0.428137	0.556	0.165	0	0	3.3697
AT3G26900	SKL1	0	0.427498	0.649	0.274	0	0	2.36861
AT4G39970	AT4G39970	0	0.426928	0.587	0.195	0	0	3.01026
AT5G14260	AT5G14260	0	0.426592	0.573	0.178	0	0	3.2191
AT5G19770	TUBA3	0	0.426508	0.6	0.224	0	0	2.67857
AT5G05200	AT5G05200	0	0.425687	0.597	0.223	0	0	2.67713
AT5G62790	DXR	0	0.425555	0.554	0.165	0	0	3.35758
AT4G31530	AT4G31530	0	0.424828	0.594	0.19	0	0	3.12632
AT1G32550	FdC1	0	0.424482	0.568	0.164	0	0	3.46341
AT2G30950	VAR2	0	0.424282	0.913	0.652	0	0	1.40031
AT5G13120	PNSL5	0	0.422437	0.635	0.273	0	0	2.32601
AT2G23600	ACL	0	0.422158	0.525	0.159	0	0	3.30189
AT3G47860	CHL	0	0.421736	0.551	0.157	0	0	3.50955
AT4G28025	AT4G28025	0	0.419255	0.804	0.472	0	0	1.70339
AT3G16250	PNSB3	0	0.417792	0.484	0.107	0	0	4.52336
AT1G06460	ACD32.1	0	0.415443	0.494	0.125	0	0	3.952
AT1G08550	VDE1	0	0.415306	0.521	0.138	0	0	3.77536
AT1G03475	CPX1	0	0.413711	0.615	0.272	0	0	2.26103
AT5G57560	XTH22	0	0.412206	0.76	0.332	0	0	2.28916
AT1G77490	APXT	0	0.411411	0.662	0.296	0	0	2.23649
AT1G16080	AT1G16080	0	0.410433	0.599	0.219	0	0	2.73516
AT4G17560	AT4G17560	0	0.40993	0.628	0.237	0	0	2.64979
AT5G03940	FFC	0	0.408919	0.573	0.186	0	0	3.08065
AT1G20010	TUBB5	0	0.408587	0.454	0.092	0	0	4.93478
AT1G32070	NSI	0	0.407877	0.529	0.15	0	0	3.52667
AT3G62550	AT3G62550	0	0.407565	0.347	0.072	0	0	4.81944
AT1G76100	PETE1	0	0.406301	0.457	0.097	0	0	4.71134
ATCG00720	PETB	0	0.405121	0.985	0.865	0	0	1.13873
AT5G66530	AT5G66530	0	0.404722	0.5	0.144	0	0	3.47222
AT4G31780	MGD1	0	0.404653	0.732	0.388	0	0	1.8866
AT3G15850	ADS3	0	0.403442	0.685	0.326	0	0	2.10123
AT1G11750	CLPP6	0	0.402406	0.654	0.295	0	0	2.21695
AT3G10060	FKBP16-4	0	0.402266	0.609	0.244	0	0	2.4959
AT5G60600	ISPG	0	0.401618	0.747	0.401	0	0	1.86284
AT5G16400	TRXF2	0	0.401046	0.496	0.135	0	0	3.67407
AT5G01650	AT5G01650	0	0.400247	0.809	0.492	0	0	1.64431
AT2G05620	PGR5	0	0.399709	0.815	0.487	0	0	1.67351
AT1G15500	AATP2	0	0.399668	0.634	0.279	0	0	2.2724
AT1G55490	CPN60B1	0	0.39943	0.753	0.414	0	0	1.81884
AT1G74670	GASA6	0	0.397872	0.331	0.062	0	0	5.33871
AT1G32080	PLGG1	0	0.39766	0.544	0.168	0	0	3.2381
AT2G21385	AT2G21385	0	0.397036	0.639	0.291	0	0	2.19588
AT3G57530	CPK32	0	0.396957	0.726	0.396	0	0	1.83333
AT2G26340	AT2G26340	0	0.39684	0.65	0.275	0	0	2.36364
AT4G34090	AT4G34090	0	0.39664	0.518	0.144	0	0	3.59722
ATCG00440	NDHC	0	0.396347	0.997	0.979	0	0	1.01839
AT2G01590	CRR3	0	0.396039	0.523	0.16	0	0	3.26875
AT1G16720	HCF173	0	0.395093	0.52	0.14	0	0	3.71429
AT5G58090	AT5G58090	0	0.394427	0.524	0.168	0	0	3.11905
AT5G47110	LIL3.2	0	0.392958	0.677	0.323	0	0	2.09598
AT1G62750	CPEFG	0	0.392869	0.726	0.373	0	0	1.94638
AT4G13830	ATJ20	0	0.391381	0.649	0.32	0	0	2.02813
AT3G22960	PKP1	0	0.39116	0.704	0.364	0	0	1.93407
AT3G26710	CCB1	0	0.390842	0.673	0.313	0	0	2.15016
AT1G02560	CLPP5	0	0.39065	0.738	0.394	0	0	1.8731
AT4G38225	AT4G38225	0	0.389983	0.637	0.284	0	0	2.24296
AT4G14270	CID2	0	0.389709	0.37	0.086	0	0	4.30233
AT2G05990	MOD1	0	0.389343	0.58	0.249	0	0	2.32932
AT2G34590	E1-BETA-2	0	0.38821	0.627	0.282	0	0	2.2234
AT1G35420	AT1G35420	0	0.388193	0.48	0.12	0	0	4
AT2G42220	STR9	0	0.388001	0.369	0.091	0	0	4.05495
AT5G28750	TATA	0	0.387903	0.756	0.428	0	0	1.76636
AT4G33010	GLDP1	0	0.387124	0.488	0.143	0	0	3.41259
AT1G73530	ORRM6	0	0.385115	0.57	0.221	0	0	2.57919
AT4G36730	GBF1	0	0.383106	0.67	0.337	0	0	1.98813
AT3G25530	GLYR1	0	0.382056	0.598	0.241	0	0	2.48133
AT5G13410	FKBP19	0	0.381231	0.601	0.242	0	0	2.48347
AT1G56280	ATDI19	0	0.380108	0.976	0.814	0	0	1.19902
AT1G12250	TL20.3	0	0.380048	0.53	0.157	0	0	3.3758
AT2G41680	NTRC	0	0.379845	0.545	0.212	0	0	2.57075
AT5G52100	DAPB3	0	0.378355	0.415	0.075	0	0	5.53333
AT5G24610	AT5G24610	0	0.378029	0.647	0.319	0	0	2.02821
AT1G70820	AT1G70820	0	0.377952	0.404	0.055	0	0	7.34545
AT1G73230	AT1G73230	0	0.377933	0.814	0.509	0	0	1.59921
AT2G29180	AT2G29180	0	0.377201	0.467	0.113	0	0	4.13274
AT3G57930	AT3G57930	0	0.374942	0.432	0.093	0	0	4.64516
AT1G65960	GAD2	0	0.374758	0.733	0.387	0	0	1.89406
AT5G04430	BTR1	0	0.374204	0.657	0.32	0	0	2.05313
AT1G73060	LPA3	0	0.373815	0.597	0.254	0	0	2.35039
AT2G25080	GPX1	0	0.373606	0.863	0.544	0	0	1.5864
AT1G31812	ACBP6	0	0.371924	0.924	0.661	0	0	1.39788
AT3G20230	AT3G20230	0	0.370865	0.474	0.13	0	0	3.64615
AT2G43750	OASB	0	0.37021	0.717	0.407	0	0	1.76167
AT2G45470	FLA8	0	0.369505	0.436	0.084	0	0	5.19048
ATCG00380	RPS4.2	0	0.368509	0.979	0.847	0	0	1.15584
AT1G28140	AT1G28140	0	0.367651	0.639	0.298	0	0	2.1443
AT1G01090	PDH-E1 ALPHA	0	0.367454	0.715	0.389	0	0	1.83805
AT3G16240	TIP2-1	0	0.367279	0.892	0.488	0	0	1.82787
AT3G09860	AT3G09860	0	0.3671	0.565	0.225	0	0	2.51111
AT4G02725	AT4G02725	0	0.36667	0.553	0.198	0	0	2.79293
AT2G34510	AT2G34510	0	0.366122	0.411	0.074	0	0	5.55405
AT4G29060	emb2726	0	0.366059	0.563	0.237	0	0	2.37553
AT5G58260	ndhN	0	0.363591	0.407	0.076	0	0	5.35526
AT5G16030	AT5G16030	0	0.362693	0.309	0.044	0	0	7.02273
AT5G08280	HEMC	0	0.362169	0.595	0.295	0	0	2.01695
AT2G32650	AT2G32650	0	0.36171	0.427	0.098	0	0	4.35714
AT5G02120	OHP1	0	0.361448	0.547	0.205	0	0	2.66829
AT3G56650	PPD6	0	0.359776	0.462	0.119	0	0	3.88235
AT5G52440	TATB	0	0.359682	0.526	0.187	0	0	2.81283
AT3G50685	AT3G50685	0	0.35934	0.427	0.097	0	0	4.40206
AT1G67280	AT1G67280	0	0.358563	0.625	0.306	0	0	2.04248
AT5G58330	AT5G58330	0	0.358195	0.625	0.285	0	0	2.19298
AT1G65230	AT1G65230	0	0.358083	0.449	0.096	0	0	4.67708
AT1G56300	AT1G56300	0	0.357078	0.564	0.232	0	0	2.43103
AT5G17670	AT5G17670	0	0.356539	0.552	0.214	0	0	2.57944
AT5G51550	EXL3.1	0	0.355636	0.35	0.061	0	0	5.7377
AT5G66210	CPK28	0	0.355021	0.603	0.261	0	0	2.31034
AT4G32590	AT4G32590	0	0.354945	0.715	0.406	0	0	1.76108
AT5G11450	AT5G11450	0	0.354717	0.508	0.184	0	0	2.76087
AT1G52510	AT1G52510	0	0.354493	0.608	0.27	0	0	2.25185
AT1G64770	NDF2	0	0.353978	0.488	0.132	0	0	3.69697
AT5G46290	KASI	0	0.353699	0.626	0.309	0	0	2.02589
AT2G48070	RPH1	0	0.353644	0.526	0.187	0	0	2.81283
AT3G04790	RPI3	0	0.352448	0.516	0.218	0	0	2.36697
AT1G21065	AT1G21065	0	0.350822	0.762	0.445	0	0	1.71236
AT5G52920	PKP2	0	0.350405	0.685	0.366	0	0	1.87158
AT5G05690	CYP90A1	0	0.34997	0.699	0.32	0	0	2.18438
AT5G22640	TIC100	0	0.348965	0.458	0.121	0	0	3.78512
AT1G73885	AT1G73885	0	0.34773	0.504	0.177	0	0	2.84746
AT2G42590	GRF9	0	0.347343	0.737	0.428	0	0	1.72196
AT5G46800	BOU	0	0.344969	0.503	0.18	0	0	2.79444
AT2G47590	PHR2	0	0.344007	0.492	0.154	0	0	3.19481
AT1G79700	AT1G79700	0	0.343066	0.393	0.073	0	0	5.38356
AT4G09040	AT4G09040	0	0.340704	0.465	0.143	0	0	3.25175
AT5G51820	PGMP	0	0.340638	0.499	0.162	0	0	3.08025
AT3G24430	HCF101	0	0.340615	0.481	0.132	0	0	3.64394
AT1G79440	ALDH5F1	0	0.340601	0.556	0.253	0	0	2.19763
ATCG00790	RPL16.1	0	0.340135	0.934	0.692	0	0	1.34971
AT3G46970	PHS2	0	0.339689	0.446	0.119	0	0	3.7479
AT4G33670	LGALDH	0	0.339661	0.495	0.169	0	0	2.92899
AT5G35100	AT5G35100	0	0.339523	0.58	0.258	0	0	2.24806
AT1G56200	emb1303	0	0.339419	0.893	0.605	0	0	1.47603
AT3G11170	FAD7	0	0.339201	0.765	0.428	0	0	1.78738
ATCG01070	NDHE	0	0.339157	0.929	0.641	0	0	1.4493
AT3G55250	PSA3	0	0.339027	0.427	0.098	0	0	4.35714
AT3G63540	AT3G63540	0	0.338489	0.652	0.339	0	0	1.9233
AT1G09795	HISN1B	0	0.336977	0.609	0.301	0	0	2.02326
AT4G08280	AT4G08280	0	0.336453	0.646	0.332	0	0	1.94578
AT3G18050	AT3G18050	0	0.335012	0.394	0.067	0	0	5.8806
AT5G57170	AT5G57170	0	0.334764	0.383	0.079	0	0	4.8481
AT1G04420	AT1G04420	0	0.334318	0.481	0.183	0	0	2.62842
AT5G54290	CcdA	0	0.333749	0.484	0.164	0	0	2.95122
AT1G11430	MORF9	0	0.333214	0.592	0.292	0	0	2.0274
AT3G07460	AT3G07460	0	0.333173	0.453	0.124	0	0	3.65323
AT5G42765	AT5G42765	0	0.330716	0.488	0.161	0	0	3.03106
ATCG00470	ATPE	0	0.330026	1	0.997	0	0	1.00301
AT1G32200	ATS1	0	0.329764	0.465	0.148	0	0	3.14189
AT4G35000	APX3	0	0.329216	0.841	0.537	0	0	1.56611
AT5G59250	AT5G59250	0	0.328758	0.467	0.149	0	0	3.13423
AT2G45740	PEX11D	0	0.32812	0.87	0.542	0	0	1.60517
AT5G48300	APS1	0	0.326036	0.553	0.256	0	0	2.16016
AT1G21350	AT1G21350	0	0.325592	0.532	0.224	0	0	2.375
AT1G44920	AT1G44920	0	0.32371	0.429	0.121	0	0	3.54545
AT2G32500	AT2G32500	0	0.322013	0.48	0.172	0	0	2.7907
AT5G17920	MS1	0	0.321926	0.72	0.409	0	0	1.76039
AT1G10760	GWD1	0	0.321521	0.523	0.212	0	0	2.46698
AT3G08920	STR10	0	0.321286	0.382	0.065	0	0	5.87692
AT5G55220	TIG	0	0.321152	0.528	0.221	0	0	2.38914
AT5G42270	FTSH5	0	0.320556	0.621	0.299	0	0	2.07692
AT1G80480	PTAC17	0	0.319056	0.501	0.199	0	0	2.51759
AT5G11480	AT5G11480	0	0.318881	0.401	0.103	0	0	3.8932
AT5G27560	AT5G27560	0	0.318704	0.511	0.198	0	0	2.58081
AT5G46420	AT5G46420	0	0.318281	0.51	0.201	0	0	2.53731
AT1G51110	PAP12	0	0.31824	0.489	0.172	0	0	2.84302
AT4G27600	NARA5	0	0.318009	0.518	0.204	0	0	2.53922
AT4G18370	DEGP5	0	0.317916	0.475	0.164	0	0	2.89634
AT3G61440	CYSC1	0	0.316926	0.766	0.418	0	0	1.83254
AT1G18170	FKBP17-2	0	0.316515	0.451	0.158	0	0	2.85443
AT2G26900	BASS2	0	0.316184	0.409	0.117	0	0	3.49573
AT2G29290	AT2G29290	0	0.316141	0.333	0.05	0	0	6.66
AT2G06925	PLA2-ALPHA	0	0.316126	0.369	0.068	0	0	5.42647
AT5G45390	CLPP4	0	0.31591	0.764	0.473	0	0	1.61522
AT2G20270	AT2G20270	0	0.315109	0.623	0.329	0	0	1.89362
AT5G13140	AT5G13140	0	0.314871	0.421	0.092	0	0	4.57609
AT3G52230	AT3G52230	0	0.314709	0.69	0.398	0	0	1.73367
AT1G08110	AT1G08110	0	0.313313	0.755	0.445	0	0	1.69663
AT5G19540	AT5G19540	0	0.312673	0.462	0.173	0	0	2.67052
AT1G60550	MENB	0	0.312074	0.404	0.111	0	0	3.63964
AT1G54500	AT1G54500	0	0.311211	0.41	0.112	0	0	3.66071
AT2G18710	SCY1	0	0.310599	0.573	0.269	0	0	2.13011
AT3G52180	DSP4	0	0.310311	0.476	0.175	0	0	2.72
AT3G23700	AT3G23700	0	0.30984	0.423	0.106	0	0	3.99057
ATCG00130	ATPF	0	0.309308	1	0.998	0	0	1.002
AT2G21960	AT2G21960	0	0.309271	0.428	0.126	0	0	3.39683
AT3G19900	AT3G19900	0	0.308089	0.53	0.236	0	0	2.24576
AT3G23490	CYN	0	0.307676	0.793	0.49	0	0	1.61837
ATCG00780	RPL14	0	0.307439	0.869	0.58	0	0	1.49828
AT4G39900	AT4G39900	0	0.307234	0.403	0.107	0	0	3.76636
AT3G22120	CWLP	0	0.307031	0.519	0.158	0	0	3.28481
AT1G30120	PDH-E1 BETA	0	0.306808	0.548	0.249	0	0	2.2008
AT5G14970	AT5G14970	0	0.306592	0.527	0.241	0	0	2.18672
AT4G23890	ndhS	0	0.3056	0.511	0.209	0	0	2.44498
AT3G12290	FOLD2	0	0.305471	0.558	0.259	0	0	2.15444
AT1G21600	PTAC6	0	0.305152	0.435	0.139	0	0	3.1295
AT2G36990	SIGF	0	0.305029	0.37	0.077	0	0	4.80519
AT4G14890	FdC2	0	0.304823	0.317	0.051	0	0	6.21569
ATCG00810	RPL22	0	0.304436	0.835	0.535	0	0	1.56075
AT5G06060	AT5G06060	0	0.30311	0.426	0.136	0	0	3.13235
AT5G62690	TUBB3	0	0.302213	0.535	0.233	0	0	2.29614
AT1G09940	HEMA2	0	0.3016	0.771	0.456	0	0	1.69079
AT1G22590	AGL87	0	0.301326	0.36	0.084	0	0	4.28571
AT2G21280	GC1.1	0	0.300873	0.488	0.179	0	0	2.72626
AT4G13670	PTAC5	0	0.30083	0.389	0.092	0	0	4.22826
AT2G43910	ATHOL1	0	0.299745	0.442	0.13	0	0	3.4
AT3G50060	MYB77	0	0.299733	0.288	0.054	0	0	5.33333
AT3G02690	AT3G02690	0	0.298932	0.433	0.12	0	0	3.60833
AT1G50900	LTD	0	0.298566	0.367	0.091	0	0	4.03297
AT2G43920	HOL2	0	0.298064	0.387	0.114	0	0	3.39474
AT5G57930	APO2	0	0.296124	0.367	0.08	0	0	4.5875
AT5G52960	AT5G52960	0	0.295224	0.452	0.143	0	0	3.16084
AT1G50450	AT1G50450	0	0.292701	0.441	0.151	0	0	2.92053
AT3G48730	GSA2	0	0.29151	0.418	0.135	0	0	3.0963
AT2G46910	PAP10.1	0	0.290958	0.449	0.148	0	0	3.03378
AT1G76405	OEP21B	0	0.290938	0.356	0.076	0	0	4.68421
AT5G25630	AT5G25630	0	0.290705	0.369	0.076	0	0	4.85526
AT5G23040	CPP1	0	0.290238	0.634	0.336	0	0	1.8869
AT4G33480	AT4G33480	0	0.288128	0.387	0.113	0	0	3.42478
AT5G67370	CGLD27	0	0.287397	0.421	0.152	0	0	2.76974
AT1G13270	MAP1B	0	0.286694	0.454	0.176	0	0	2.57955
AT1G11530	CXXS1	0	0.286468	0.437	0.158	0	0	2.76582
AT3G16570	RALF23	0	0.286248	0.394	0.105	0	0	3.75238
AT2G30170	AT2G30170	0	0.286237	0.462	0.161	0	0	2.86957
AT1G20810	FKBP18	0	0.284505	0.475	0.168	0	0	2.82738
AT3G55040	GSTL2	0	0.283603	0.432	0.145	0	0	2.97931
AT3G53800	Fes1B	0	0.283389	0.309	0.045	0	0	6.86667
AT5G08650	AT5G08650	0	0.283182	0.436	0.13	0	0	3.35385
AT3G43540	AT3G43540	0	0.27818	0.374	0.087	0	0	4.29885
AT4G37925	NDHM	0	0.277826	0.339	0.055	0	0	6.16364
AT3G17930	AT3G17930	0	0.277433	0.406	0.13	0	0	3.12308
AT4G02790	DGP3	0	0.277212	0.368	0.094	0	0	3.91489
AT1G76730	COG0212	0	0.277026	0.436	0.161	0	0	2.70807
AT2G42600	PPC2	0	0.276565	0.43	0.137	0	0	3.13869
AT5G22340	AT5G22340	0	0.276335	0.427	0.144	0	0	2.96528
AT2G25840	OVA4	0	0.276183	0.412	0.137	0	0	3.0073
AT5G38980	AT5G38980	0	0.275958	0.337	0.089	0	0	3.78652
AT4G38160	pde191	0	0.275333	0.319	0.061	0	0	5.22951
AT5G51545	LPA2	0	0.275127	0.39	0.109	0	0	3.57798
AT2G21250	AT2G21250	0	0.274977	0.431	0.139	0	0	3.10072
ATCG00480	ATPB	0	0.274765	0.939	0.692	0	0	1.35694
AT1G04640	LIP2	0	0.2742	0.371	0.105	0	0	3.53333
ATCG00800	RPS3	0	0.274019	0.856	0.572	0	0	1.4965
AT1G08520	CHLD	0	0.273475	0.458	0.178	0	0	2.57303
AT3G29320	PHS1.2	0	0.272757	0.355	0.084	0	0	4.22619
AT3G62910	APG3	0	0.272266	0.399	0.116	0	0	3.43966
AT3G29185	AT3G29185	0	0.271986	0.351	0.074	0	0	4.74324
AT5G12250	TUBB6	0	0.271945	0.446	0.147	0	0	3.03401
AT5G47770	FPS1	0	0.271874	0.419	0.148	0	0	2.83108
ATCG01040	CCSA	0	0.271781	0.953	0.729	0	0	1.30727
AT2G47450	CAO.1	0	0.270331	0.381	0.117	0	0	3.25641
AT5G23060	CAS	0	0.26929	0.387	0.096	0	0	4.03125
AT5G14660	PDF1B	0	0.267674	0.396	0.122	0	0	3.2459
AT5G18100	CSD3	0	0.267658	0.446	0.16	0	0	2.7875
AT1G64355	AT1G64355	0	0.267301	0.319	0.05	0	0	6.38
AT2G47930	AGP26	0	0.266017	0.303	0.059	0	0	5.13559
AT5G36170	PRFB1	0	0.265964	0.394	0.132	0	0	2.98485
AT3G60370	AT3G60370	0	0.26502	0.387	0.116	0	0	3.33621
AT3G10520	AHB2	0	0.264477	0.421	0.154	0	0	2.73377
AT4G09620	AT4G09620	0	0.261749	0.385	0.124	0	0	3.10484
ATCG00340	PSAB	0	0.260212	0.988	0.912	0	0	1.08333
AT5G44130	FLA13	0	0.259844	0.319	0.073	0	0	4.36986
AT5G19140	ATAILP1	0	0.258489	0.783	0.45	0	0	1.74
AT1G22740	RABG3B	0	0.258267	0.305	0.066	0	0	4.62121
AT1G15980	PNSB1	0	0.257579	0.324	0.055	0	0	5.89091
AT1G68520	COL6	0	0.254388	0.266	0.047	0	0	5.65957
AT4G27700	AT4G27700	0	0.253613	0.378	0.114	0	0	3.31579
AT1G20693	HMGB2	0	0.253473	0.629	0.326	0	0	1.92945
AT5G18660	DVR	0	0.253256	0.334	0.07	0	0	4.77143
AT1G32220	AT1G32220	0	0.251931	0.42	0.159	0	0	2.64151
AT5G53860	emb2737	0	0.251218	0.404	0.129	0	0	3.13178
AT4G28740	AT4G28740	0	0.251199	0.347	0.091	0	0	3.81319
ATCG01050	NDHD	0	0.251125	0.981	0.848	0	0	1.15684
AT5G53580	PLR1	0	0.250362	0.384	0.122	0	0	3.14754
AT1G79790	AT1G79790	0	0.248306	0.33	0.089	0	0	3.70787
AT1G13380	AT1G13380	0	0.246112	0.426	0.14	0	0	3.04286
AT5G18140	AT5G18140	0	0.245371	0.323	0.081	0	0	3.98765
AT3G15480	AT3G15480	0	0.243872	0.487	0.192	0	0	2.53646
AT1G33040	NACA5	0	0.242296	0.345	0.098	0	0	3.52041
AT5G24420	PGL5	0	0.240087	0.273	0.051	0	0	5.35294
ATCG00170	RPOC2	0	0.240045	0.849	0.567	0	0	1.49735
AT1G78040	AT1G78040	0	0.23981	0.931	0.689	0	0	1.35123
AT1G13440	GAPC2	0	0.238119	0.823	0.535	0	0	1.53832
AT5G20140	AT5G20140	0	0.231597	0.321	0.081	0	0	3.96296
AT2G47940	DEGP2	0	0.231117	0.419	0.159	0	0	2.63522
AT4G27760	FEY	0	0.230788	0.323	0.086	0	0	3.75581
AT3G11945	PDS2	0	0.230414	0.365	0.103	0	0	3.54369
AT3G10940	LSF2	0	0.22918	0.306	0.077	0	0	3.97403
AT4G12970	EPFL9	0	0.228859	0.277	0.045	0	0	6.15556
AT1G70410	BCA4	0	0.227069	0.73	0.431	0	0	1.69374
AT4G14870	SECE1	0	0.226722	0.329	0.095	0	0	3.46316
AT1G31800	CYP97A3	0	0.225648	0.363	0.12	0	0	3.025
AT1G64150	PAM71	0	0.225011	0.298	0.068	0	0	4.38235
AT1G15690	AVP1	0	0.223751	0.707	0.401	0	0	1.76309
AT4G30660	AT4G30660	0	0.222736	0.281	0.063	0	0	4.46032
AT2G02500	ISPD	0	0.221915	0.326	0.089	0	0	3.66292
AT1G75800	AT1G75800	0	0.22178	0.34	0.099	0	0	3.43434
AT2G33855	AT2G33855	0	0.221525	0.315	0.085	0	0	3.70588
AT3G04550	RAF1.2	0	0.218461	0.278	0.052	0	0	5.34615
AT1G59840	CCB4	0	0.217898	0.326	0.09	0	0	3.62222
AT3G16000	MFP1	0	0.217868	0.273	0.046	0	0	5.93478
AT3G51420	SSL4	0	0.214932	0.33	0.091	0	0	3.62637
AT5G48545	HINT3	0	0.212314	0.267	0.055	0	0	4.85455
AT2G32180	PTAC18	0	0.212224	0.255	0.041	0	0	6.21951
AT1G63610	AT1G63610	0	0.210088	0.321	0.091	0	0	3.52747
AT4G20870	FAH2	0	0.208927	0.513	0.224	0	0	2.29018
AT1G08540	SIGB	0	0.204919	0.292	0.074	0	0	3.94595
AT5G05580	FAD8	0	0.204835	0.299	0.071	0	0	4.21127
AT1G49980	POLK	0	0.20286	0.289	0.071	0	0	4.07042
AT4G38430	ROPGEF1	0	0.201335	0.299	0.072	0	0	4.15278
AT4G04340	OSCA1	0	0.197943	0.282	0.063	0	0	4.47619
AT3G07670	AT3G07670	0	0.197487	0.257	0.048	0	0	5.35417
AT3G54920	PMR6	0	0.176206	0.332	0.11	0	0	3.01818
AT1G05850	CTL1	0	0.168055	0.572	0.272	0	0	2.10294
ATCG00680	PSBB	0	0.166829	0.997	0.974	0	0	1.02361
ATCG00120	ATPA	0	0.166452	0.904	0.649	0	0	1.39291
ATCG00580	PSBE	0	0.154851	0.922	0.679	0	0	1.35788
AT3G11700	FLA18	0	0.123828	0.273	0.073	0	0	3.73973
AT1G13820	AT1G13820	4.94065645841247e-324	0.253735	0.406	0.15	1.62221514155515e-319	0	2.70667
AT2G22230	AT2G22230	1.48219693752374e-323	0.268927	0.411	0.147	4.86664542466545e-319	0	2.79592
AT2G35500	SKL2	1.48219693752374e-323	0.241316	0.359	0.115	4.86664542466545e-319	0	3.12174
AT5G13630	CHLH	1.03753785626662e-321	0.314849	0.407	0.136	3.40665179726581e-317	0	2.99265
ATCG00540	PETA	3.03850372192367e-321	0.214794	0.96	0.763	9.97662312056417e-317	0	1.25819
AT2G41560	ACA4	4.18473602027536e-321	0.133817	0.306	0.103	1.37401622489721e-316	0	2.97087
AT3G23760	AT3G23760	4.64915772736613e-321	0.193793	0.282	0.07	1.5265044482034e-316	0	4.02857
AT3G20810	JMJ30	9.17479904327195e-321	0.31583	0.391	0.125	3.01245351786791e-316	0	3.128
AT2G21530	AT2G21530	2.25491560761945e-320	0.215185	0.259	0.054	7.4037899060577e-316	0	4.7963
AT3G58010	PAP9	3.71883211624706e-320	0.198195	0.332	0.106	1.22104133704856e-315	0	3.13208
ATCG00430	NDHK	2.82906929465156e-319	0.204105	0.78	0.49	9.28896612205894e-315	0	1.59184
AT2G17240	AT2G17240	3.70539353068018e-319	0.356291	0.709	0.404	1.21662891186353e-314	0	1.75495
AT5G51970	SDH	7.18154060169002e-319	0.283632	0.462	0.189	2.3579870411589e-314	0	2.44444
AT4G13640	UNE16	4.85558329485506e-318	0.20591	0.307	0.084	1.59428221903271e-313	0	3.65476
AT1G19350	BES1	5.47565544301166e-318	0.218149	0.264	0.054	1.79787670815845e-313	0	4.88889
AT1G74910	AT1G74910	8.10508763214815e-318	0.309783	0.458	0.179	2.66122447313952e-313	0	2.55866
AT1G75460	AT1G75460	1.33824008662959e-315	0.250388	0.332	0.099	4.3939775004396e-311	0	3.35354
AT5G48790	AT5G48790	1.63425565474202e-315	0.241182	0.456	0.193	5.36591501677996e-311	0	2.36269
AT4G14880	OASA1	2.06451944171566e-315	0.373144	0.903	0.627	6.77864313492919e-311	0	1.44019
AT2G36250	FTSZ2-1	2.92217185498417e-315	0.299758	0.504	0.225	9.59465906865503e-311	0	2.24
AT2G28305	LOG1	2.63390043583445e-314	0.285097	0.398	0.133	8.64814869101883e-310	0	2.99248
AT1G69740	HEMB1	3.22699807505754e-313	0.338086	0.723	0.417	1.05955254796439e-308	0	1.73381
AT3G25660	GATA	4.21278740165687e-313	0.235067	0.377	0.134	1.38322661546002e-308	0	2.81343
AT5G17170	ENH1	4.78074842877774e-313	0.470546	0.521	0.217	1.56971093910488e-308	0	2.40092
AT5G45750	RABA1C	3.18311280071964e-312	0.288327	0.544	0.255	1.05e-307	0	2.13333
AT1G72640	AT1G72640	5.24522352019514e-312	0.188912	0.305	0.09	1.72e-307	0	3.38889
AT3G63520	CCD1	7.7794645943654e-312	0.287068	0.516	0.233	2.55e-307	0	2.21459
AT5G28840	GME	8.40872221286939e-312	0.331691	0.791	0.482	2.76e-307	0	1.64108
AT4G00810	RPP1B	2.50787539321661e-311	0.312202	0.847	0.552	8.23e-307	0	1.53442
AT1G55330	AGP21	8.66331351764237e-311	0.208197	0.633	0.332	2.84e-306	0	1.90663
AT5G22920	RZPF34	2.6849268437977e-310	0.353677	0.39	0.118	8.82e-306	0	3.30508
AT5G55210	AT5G55210	3.09181995880437e-310	0.214187	0.333	0.103	1.02e-305	0	3.23301
AT4G25370	CLPT1	4.35715136211819e-310	0.298331	0.65	0.363	1.43e-305	0	1.79063
AT5G19760	DTC	7.73080374601745e-310	0.293072	0.805	0.525	2.54e-305	0	1.53333
AT4G16980	AT4G16980	8.77504403306991e-310	0.217993	0.375	0.132	2.88e-305	0	2.84091
AT5G62700	TUBB3.1	4.82966388796755e-309	0.228083	0.459	0.195	1.59e-304	0	2.35385
AT4G37610	BT5	7.80430337757734e-309	0.371606	0.67	0.352	2.56e-304	0	1.90341
ATCG00740	RPOA	2.98e-308	0.260752	0.942	0.717	9.78e-304	0	1.31381
AT2G35450	AT2G35450	3.22e-308	0.229991	0.336	0.101	1.06e-303	0	3.32673
AT2G44640	AT2G44640	5.26e-308	0.254254	0.322	0.085	1.73e-303	0	3.78824
AT2G05070	LHCB2.2	1.8e-307	0.845832	0.328	0.074	5.92e-303	0	4.43243
AT2G46100	AT2G46100	2.07e-307	0.2394	0.418	0.165	6.81e-303	0	2.53333
AT1G78915	AT1G78915	3.68e-307	0.223611	0.31	0.083	1.21e-302	0	3.73494
AT5G40610	DHAPRD	7.84e-307	0.227195	0.3	0.076	2.57e-302	0	3.94737
AT1G01050	PPA1	8.14e-307	0.284402	0.573	0.288	2.67e-302	0	1.98958
AT2G38040	CAC3	3.95e-305	0.289729	0.507	0.231	1.3e-300	0	2.19481
AT3G11820	SYP121	7.48e-305	0.353425	0.834	0.549	2.46e-300	0	1.51913
AT4G32060	MICU	1.47e-304	0.374235	0.558	0.255	4.84e-300	0	2.18824
AT3G12080	emb2738	5.42e-304	0.251464	0.389	0.141	1.78e-299	0	2.75887
AT3G15520	CYP37	1.27e-303	0.252157	0.421	0.165	4.16e-299	0	2.55152
AT5G22210	AT5G22210	1.54e-303	0.200768	0.307	0.093	5.05e-299	0	3.30108
AT5G53050	AT5G53050	2.12e-303	0.395143	0.753	0.461	6.98e-299	0	1.63341
AT4G01995	AT4G01995	2.6e-303	0.195662	0.3	0.087	8.52e-299	0	3.44828
AT1G28380	NSL1	3.32e-303	0.294981	0.662	0.368	1.09e-298	0	1.79891
AT3G62650	AT3G62650	4.39e-303	0.299086	0.479	0.2	1.44e-298	0	2.395
AT4G26370	AT4G26370	9.76e-303	0.216491	0.274	0.062	3.2e-298	0	4.41935
AT1G22430	AT1G22430	4.6e-302	0.22342	0.349	0.113	1.51e-297	0	3.0885
AT4G21960	PER42	7.05e-302	0.215954	0.376	0.133	2.32e-297	0	2.82707
AT1G70310	SPDSYN2	1.02e-300	0.255374	0.48	0.22	3.36e-296	0	2.18182
AT3G10850	GLX2-2	1.18e-300	0.27479	0.558	0.282	3.86e-296	0	1.97872
AT4G33510	DHS2	1.19e-300	0.267695	0.71	0.429	3.91e-296	0	1.65501
AT1G18060	AT1G18060	3.11e-300	0.27744	0.397	0.142	1.02e-295	0	2.79577
AT3G18890	TIC62	4.25e-300	0.22295	0.388	0.146	1.4e-295	0	2.65753
AT2G30695	AT2G30695	9.51e-300	0.208328	0.288	0.073	3.12e-295	0	3.94521
AT1G19770	PUP14	1.2e-299	0.123322	0.622	0.352	3.94e-295	0	1.76705
AT5G66880	SRK2I	1.33e-299	0.234722	0.295	0.071	4.36e-295	0	4.15493
AT5G58250	AT5G58250	3.61e-299	0.241571	0.298	0.077	1.19e-294	0	3.87013
AT1G76650	CML38	3.83e-299	0.457266	0.973	0.807	1.26e-294	0	1.2057
AT4G33520	PAA1.1	8.65e-299	0.288695	0.617	0.336	2.84e-294	0	1.83631
ATCG01100	NDHA	1.03e-297	0.134198	0.651	0.386	3.38e-293	0	1.68653
AT5G58430	EXO70B1	1.1e-297	0.332586	0.539	0.257	3.6e-293	0	2.09728
AT5G19370	AT5G19370	4.52e-297	0.233944	0.43	0.184	1.49e-292	0	2.33696
AT3G01390	VHA-G1	1.14e-296	0.307071	0.764	0.472	3.76e-292	0	1.61864
AT1G17220	FUG1	1.37e-296	0.201239	0.331	0.11	4.51e-292	0	3.00909
AT5G35360	CAC2	5.73e-296	0.279744	0.573	0.296	1.88e-291	0	1.93581
AT3G60210	CPN10-1	8.42e-296	0.253036	0.523	0.26	2.77e-291	0	2.01154
AT5G07090	RPS4B	1.51e-295	0.331675	0.847	0.561	4.97e-291	0	1.5098
AT5G13100	AT5G13100	2.14e-295	0.249407	0.791	0.505	7.01e-291	0	1.56634
AT5G53940	AT5G53940	2.24e-295	0.213272	0.355	0.128	7.35e-291	0	2.77344
AT4G25740	RPS10A	3.7e-295	0.293904	0.778	0.485	1.22e-290	0	1.60412
AT5G42900	COR27	5.55e-295	0.36147	0.646	0.329	1.82e-290	0	1.96353
AT1G54520	AT1G54520	5.56e-295	0.224765	0.523	0.268	1.83e-290	0	1.95149
AT1G15730	AT1G15730	2.1e-294	0.229475	0.34	0.109	6.9e-290	0	3.11927
AT3G53990	AT3G53990	4.09e-294	0.249505	0.748	0.464	1.34e-289	0	1.61207
AT4G26520	AT4G26520	7.33e-294	0.195659	0.251	0.052	2.41e-289	0	4.82692
AT2G11910	AT2G11910	3.62e-293	0.262514	0.553	0.278	1.19e-288	0	1.98921
AT4G39460	SAMC1	7.94e-293	0.225576	0.405	0.165	2.61e-288	0	2.45455
AT5G02790	GSTL3	1.17e-292	0.214424	0.642	0.375	3.84e-288	0	1.712
AT4G28080	TSS	3.56e-292	0.22765	0.335	0.106	1.17e-287	0	3.16038
ATCG00520	YCF4	9.61e-292	0.162036	0.713	0.444	3.16e-287	0	1.60586
ATCG00530	CEMA	1.01e-291	0.0836541	0.767	0.522	3.33e-287	0	1.46935
AT3G23920	BAM1.1	1.54e-291	0.552973	0.898	0.677	5.05e-287	0	1.32644
AT4G14210	PDS	2.71e-291	0.229773	0.422	0.179	8.9e-287	0	2.35754
AT4G31560	HCF153	3.33e-291	0.270306	0.512	0.246	1.09e-286	0	2.0813
AT2G41090	CML10	4.84e-291	0.388806	0.298	0.064	1.59e-286	0	4.65625
AT1G02280	TOC33	1.52e-290	0.28854	0.499	0.235	4.98e-286	0	2.1234
AT5G21170	AKINBETA1	4.29e-290	0.318166	0.668	0.369	1.41e-285	0	1.8103
AT3G23400	PAP6.1	8.26e-288	0.258298	0.64	0.359	2.71e-283	0	1.78273
AT5G08410	FTRA2	9.74e-287	0.295831	0.607	0.333	3.2e-282	0	1.82282
AT5G19780	TUBA3.1	1.83e-286	0.204821	0.365	0.137	6e-282	0	2.66423
ATCG00500	ACCD	7.36e-286	0.195803	0.936	0.706	2.42e-281	0	1.32578
AT5G16390	BCCP1	7.76e-286	0.231771	0.383	0.142	2.55e-281	0	2.69718
AT5G63320	GTE10	3.96e-285	0.319957	0.558	0.269	1.3e-280	0	2.07435
AT1G69830	AMY3	1.14e-284	0.20535	0.266	0.064	3.74e-280	0	4.15625
AT1G20090	ARAC4	1.33e-284	0.181697	0.309	0.1	4.36e-280	0	3.09
AT2G29360	SDR	6.21e-284	0.193527	0.282	0.078	2.04e-279	0	3.61538
AT3G15110	AT3G15110	6.62e-284	0.245116	0.338	0.108	2.17e-279	0	3.12963
AT3G10720	PME25	8.61e-284	0.13667	0.274	0.083	2.83e-279	0	3.3012
AT4G19160	AT4G19160	1.06e-283	0.343004	0.378	0.123	3.48e-279	0	3.07317
AT1G50250	FTSH1	2.84e-283	0.245938	0.426	0.179	9.34e-279	0	2.37989
AT4G18810	AT4G18810	6.85e-283	0.210556	0.361	0.136	2.25e-278	0	2.65441
AT5G24165	AT5G24165	8.16e-283	0.205744	0.677	0.405	2.68e-278	0	1.6716
AT3G05490	RALFL22	3.01e-282	0.301971	0.495	0.219	9.87e-278	0	2.26027
AT2G31880	SOBIR1	5.36e-282	0.0637691	0.68	0.445	1.76e-277	0	1.52809
AT1G59900	E1 ALPHA	3.8e-281	0.28621	0.604	0.329	1.25e-276	0	1.83587
AT1G68660	CPLS1	6.8e-281	0.245294	0.581	0.315	2.23e-276	0	1.84444
AT5G42825	AT5G42825	1.69e-280	0.25563	0.51	0.248	5.54e-276	0	2.05645
AT5G45040	PETJ	8.53e-280	0.192906	0.261	0.065	2.8e-275	0	4.01538
AT3G62530	AT3G62530	2.37e-279	0.354619	0.737	0.444	7.78e-275	0	1.65991
AT2G20920	AT2G20920	3.93e-279	0.235163	0.703	0.429	1.29e-274	0	1.63869
AT3G44620	AT3G44620	1.33e-278	0.216759	0.507	0.261	4.38e-274	0	1.94253
AT2G41840	RPS2C	1.89e-278	0.0712904	0.895	0.657	6.21e-274	0	1.36225
AT3G19800	AT3G19800	4.48e-277	0.191465	0.258	0.064	1.47e-272	0	4.03125
AT5G10860	CBSX3	7.53e-277	0.289753	0.81	0.528	2.47e-272	0	1.53409
AT5G50250	CP31B	1.16e-276	0.23981	0.426	0.186	3.81e-272	0	2.29032
AT2G26540	UROS	1.85e-276	0.227253	0.505	0.247	6.07e-272	0	2.04453
AT1G34430	EMB3003	4.1e-276	0.222667	0.344	0.12	1.34e-271	0	2.86667
AT4G28706	AT4G28706	1.07e-275	0.219992	0.337	0.112	3.51e-271	0	3.00893
AT4G32320	APX6	1.49e-275	0.213197	0.317	0.101	4.88e-271	0	3.13861
AT1G48420	DCD	3.67e-275	0.176877	0.321	0.113	1.2e-270	0	2.84071
AT3G56880	AT3G56880	5.09e-275	0.210542	0.647	0.353	1.67e-270	0	1.83286
AT3G10130	AT3G10130	7.4e-275	0.263257	0.473	0.223	2.43e-270	0	2.12108
AT1G07440	AT1G07440	8.49e-275	0.220945	0.288	0.08	2.79e-270	0	3.6
ATCG00070	PSBK	1.25e-274	0.0827137	0.675	0.437	4.11e-270	0	1.54462
AT1G09070	SRC2	1.59e-274	0.453584	0.999	0.988	5.21e-270	0	1.01113
ATCG00420	NDHJ	4.55e-273	0.145738	0.973	0.811	1.49e-268	0	1.19975
ATCG01080	NDHG	1.87e-272	0.179123	0.703	0.442	6.15e-268	0	1.5905
AT1G19000	AT1G19000	2.06e-272	0.289631	0.574	0.304	6.75e-268	0	1.88816
AT1G21680	AT1G21680	2.41e-272	0.279717	0.779	0.509	7.91e-268	0	1.53045
AT1G50740	FAX5	2.43e-272	0.436552	0.847	0.567	7.97e-268	0	1.49383
AT4G02890	UBQ14	3.7e-272	0.523204	0.964	0.828	1.21e-267	0	1.16425
AT2G38230	PDX11	3.21e-271	0.284617	0.843	0.564	1.05e-266	0	1.49468
ATCG00280	PSBC	1.64e-270	0.149116	0.948	0.739	5.37e-266	0	1.28281
AT1G12230	AT1G12230	2.92e-270	0.228431	0.397	0.165	9.6e-266	0	2.40606
ATCG00180	RPOC1	4.01e-270	0.176352	0.706	0.444	1.32e-265	0	1.59009
AT5G63570	GSA1	4.12e-270	0.25041	0.595	0.338	1.35e-265	0	1.76036
AT5G02240	AT5G02240	2.17e-269	0.252377	0.676	0.404	7.14e-265	0	1.67327
AT4G00300	AT4G00300	3.58e-269	0.0659378	0.535	0.328	1.17e-264	0	1.6311
AT4G23430	TIC32	1.09e-268	0.0501631	0.411	0.232	3.57e-264	0	1.77155
AT3G25690	CHUP1	2.57e-268	0.185787	0.274	0.08	8.45e-264	0	3.425
AT3G45050	AT3G45050	7.32e-268	0.203387	0.319	0.11	2.4e-263	0	2.9
AT1G52590	AT1G52590	1.11e-267	0.230653	0.4	0.166	3.65e-263	0	2.40964
AT3G10410	SCPL49	1.69e-267	0.0252541	0.439	0.27	5.55e-263	0	1.62593
AT5G16650	AT5G16650	2.9e-267	0.318132	0.715	0.434	9.53e-263	0	1.64747
AT3G53920	SIGC	2.97e-267	0.196615	0.265	0.069	9.74e-263	0	3.84058
AT1G06690	AT1G06690	3.44e-267	0.176744	0.271	0.078	1.13e-262	0	3.47436
AT1G80380	GLYK	1e-266	0.195287	0.817	0.539	3.28e-262	0	1.51577
AT1G12800	AT1G12800	1.32e-266	0.178971	0.316	0.116	4.34e-262	0	2.72414
ATCG00660	RPL20	1.43e-266	0.214658	0.541	0.287	4.7e-262	0	1.88502
AT1G30230	AT1G30230	6.93e-266	0.151687	0.943	0.709	2.28e-261	0	1.33004
AT4G01690	PPOX1.1	8.57e-266	0.274258	0.467	0.219	2.81e-261	0	2.13242
AT1G72370	RPSAA	1.25e-265	0.0572437	0.877	0.641	4.09e-261	0	1.36817
AT5G15350	ENODL17	4.56e-265	0.139571	0.296	0.106	1.5e-260	0	2.79245
AT1G35340	AT1G35340	5.45e-265	0.19382	0.286	0.088	1.79e-260	0	3.25
AT4G37510	RNC1	1.13e-264	0.186819	0.344	0.136	3.73e-260	0	2.52941
AT4G13200	AT4G13200	1.71e-264	0.193977	0.399	0.179	5.62e-260	0	2.22905
AT3G56130	AT3G56130	3.36e-264	0.244607	0.389	0.152	1.1e-259	0	2.55921
AT2G20930	AT2G20930	1.4e-263	0.18227	0.304	0.104	4.59e-259	0	2.92308
AT3G29240	AT3G29240	1.08e-262	0.216125	0.418	0.179	3.56e-258	0	2.3352
AT2G26670	HO1	1.3e-262	0.174918	0.594	0.356	4.28e-258	0	1.66854
AT1G49480	REM19	3.93e-262	0.191182	0.296	0.095	1.29e-257	0	3.11579
AT4G21210	RP1	9.43e-262	0.19686	0.33	0.123	3.1e-257	0	2.68293
AT3G15690	AT3G15690	1.43e-261	0.221415	0.36	0.138	4.69e-257	0	2.6087
AT1G56500	SOQ1	1.9e-261	0.177067	0.327	0.123	6.23e-257	0	2.65854
AT3G27050	AT3G27050	3.38e-261	0.227452	0.325	0.112	1.11e-256	0	2.90179
AT4G26710	VHA-E2.1	1.8e-260	0.204944	0.77	0.511	5.92e-256	0	1.50685
AT1G19310	AT1G19310	8.28e-260	0.267142	0.603	0.335	2.72e-255	0	1.8
AT5G23900	RPL13D	2e-259	0.173125	0.845	0.581	6.57e-255	0	1.45439
AT5G39830	DEGP8	2.54e-258	0.165163	0.278	0.09	8.35e-254	0	3.08889
ATCG00730	PETD	2.65e-258	0.0879923	0.708	0.47	8.71e-254	0	1.50638
AT3G45030	RPS20C.1	5.08e-258	0.176194	0.802	0.532	1.67e-253	0	1.50752
AT4G11010	NDPK3	6.83e-258	0.238593	0.644	0.384	2.24e-253	0	1.67708
AT5G62300	RPS20C	7.6e-258	0.031338	0.89	0.672	2.5e-253	0	1.3244
AT3G17210	HS1	8.12e-258	0.239676	0.616	0.357	2.66e-253	0	1.72549
AT2G44050	COS1	2.33e-257	0.241996	0.44	0.203	7.66e-253	0	2.16749
AT1G04620	HCAR	3.48e-257	0.223709	0.337	0.118	1.14e-252	0	2.85593
AT5G04250	AT5G04250	1.23e-256	0.273133	0.455	0.206	4.03e-252	0	2.20874
AT4G27280	KRP1.1	3.48e-256	0.371868	0.532	0.242	1.14e-251	0	2.19835
AT4G34881	AT4G34881	4.32e-256	0.227458	0.749	0.481	1.42e-251	0	1.55717
AT4G04040	PFP-BETA2	5.4e-256	0.187419	0.254	0.063	1.77e-251	0	4.03175
AT2G22670	IAA8	8.06e-256	0.273204	0.519	0.256	2.65e-251	0	2.02734
AT4G34390	XLG2	1.56e-255	0.204681	0.376	0.149	5.11e-251	0	2.52349
AT3G46010	ADF1	1.02e-254	0.0783568	0.82	0.584	3.35e-250	0	1.40411
AT3G13750	BGAL1	1.03e-254	0.123989	0.259	0.081	3.38e-250	0	3.19753
AT3G52155	AT3G52155	1.61e-254	0.171562	0.269	0.083	5.27e-250	0	3.24096
AT2G05220	RPS17B	2.16e-254	0.0540775	0.874	0.648	7.09e-250	0	1.34877
AT1G17880	BTF3	2.65e-254	0.139766	0.895	0.654	8.69e-250	0	1.3685
AT2G42770	AT2G42770	3.65e-254	0.22674	0.367	0.142	1.2e-249	0	2.58451
ATCG00650	RPS18	5.09e-254	0.19386	0.624	0.372	1.67e-249	0	1.67742
AT4G12040	SAP7	1.7e-253	0.451932	0.919	0.722	5.59e-249	0	1.27285
AT2G46220	AT2G46220	3.93e-253	0.243682	0.814	0.532	1.29e-248	0	1.53008
AT2G14880	AT2G14880	1.38e-252	0.270965	0.516	0.259	4.52e-248	0	1.99228
AT3G55440	CTIMC	2.55e-252	0.252176	0.969	0.783	8.38e-248	0	1.23755
AT1G14345	AT1G14345	4.7e-252	0.19697	0.27	0.08	1.54e-247	0	3.375
AT3G56340	RPS26C	6.18e-252	0.229483	0.912	0.663	2.03e-247	0	1.37557
AT3G02180	SP1L3	7.64e-251	0.237219	0.482	0.234	2.51e-246	0	2.05983
AT3G62290	ARFA1E	7.74e-250	0.326287	0.969	0.783	2.54e-245	0	1.23755
AT5G23740	RPS11C	1.82e-249	0.282722	0.778	0.505	5.98e-245	0	1.54059
AT4G30620	AT4G30620	3.38e-249	0.192524	0.315	0.112	1.11e-244	0	2.8125
AT2G35490	PAP3.1	4.01e-249	0.225297	0.448	0.22	1.32e-244	0	2.03636
AT3G45640	MPK3	5.33e-249	0.298687	0.357	0.126	1.75e-244	0	2.83333
AT1G08360	RPL10AA	9.75e-249	0.0587555	0.849	0.618	3.2e-244	0	1.37379
AT4G25570	ACYB-2	1.38e-248	0.150125	0.388	0.187	4.52e-244	0	2.07487
AT1G45230	DCL	1.58e-248	0.215918	0.357	0.142	5.2e-244	0	2.51408
AT1G22630	AT1G22630	3.84e-248	0.231296	0.386	0.16	1.26e-243	0	2.4125
AT2G01180	ATPAP1	3.87e-248	0.0778218	0.624	0.393	1.27e-243	0	1.58779
AT1G68220	AT1G68220	7.92e-248	0.118574	0.252	0.087	2.6e-243	0	2.89655
AT2G42210	ATOEP16-3	5.79e-247	0.199156	0.678	0.436	1.9e-242	0	1.55505
AT2G38025	AT2G38025	6.95e-247	0.234702	0.398	0.172	2.28e-242	0	2.31395
AT4G13940	SAHH1	7.37e-247	0.195701	0.907	0.668	2.42e-242	0	1.35778
AT1G09130	AT1G09130	1.09e-246	0.165846	0.475	0.257	3.58e-242	0	1.84825
AT4G01850	SAM2	1.2e-246	0.150943	0.678	0.433	3.93e-242	0	1.56582
AT3G09500	RPL35A	1.33e-246	0.163316	0.932	0.713	4.38e-242	0	1.30715
AT4G37200	HCF164	4.3e-246	0.184288	0.399	0.191	1.41e-241	0	2.08901
AT1G77060	AT1G77060	4.55e-246	0.176218	0.283	0.095	1.5e-241	0	2.97895
AT5G48655	AT5G48655	5.1e-246	0.374573	0.718	0.448	1.67e-241	0	1.60268
AT5G01590	TIC56	9.27e-246	0.17264	0.257	0.076	3.04e-241	0	3.38158
AT2G26240	FAX7	3.02e-245	0.20829	0.498	0.258	9.9e-241	0	1.93023
AT2G01450	MPK17	7.17e-245	0.134147	0.523	0.303	2.35e-240	0	1.72607
AT3G46100	ATHRS1	7.35e-245	0.19192	0.299	0.102	2.41e-240	0	2.93137
AT2G39670	AT2G39670	1.82e-244	0.184559	0.349	0.147	5.99e-240	0	2.37415
AT1G07770	RPS15AF	3.12e-244	0.226176	0.925	0.69	1.02e-239	0	1.34058
AT1G53210	NCL	4.35e-244	0.121693	0.723	0.485	1.43e-239	0	1.49072
AT3G02080	RPS19A	1.31e-243	0.154104	0.908	0.672	4.31e-239	0	1.35119
AT1G52870	AT1G52870	1.55e-243	0.21031	0.479	0.243	5.1e-239	0	1.97119
AT5G60390	A1.3	1.89e-243	0.354784	0.927	0.704	6.2e-239	0	1.31676
AT4G15930	AT4G15930	2.42e-243	0.163031	0.294	0.103	7.93e-239	0	2.85437
AT4G09650	ATPD	4.38e-243	0.330729	0.539	0.279	1.44e-238	0	1.9319
AT3G58610	AT3G58610	1.29e-242	0.17729	0.725	0.47	4.25e-238	0	1.54255
AT4G13720	AT4G13720	1.69e-242	0.195002	0.387	0.179	5.55e-238	0	2.16201
AT1G21770	AT1G21770	2.57e-242	0.232671	0.548	0.297	8.44e-238	0	1.84512
ATCG01020	RPL32	3.65e-242	0.108193	0.859	0.625	1.2e-237	0	1.3744
AT4G23400	PIP1-5	8.05e-242	0.27469	0.312	0.097	2.64e-237	0	3.21649
AT3G61080	AT3G61080	1.35e-241	0.178195	0.297	0.104	4.42e-237	0	2.85577
AT2G18020	RPL8A	2.81e-241	0.0677364	0.895	0.67	9.24e-237	0	1.33582
AT5G66052	AT5G66052	3.1e-241	0.203728	0.761	0.491	1.02e-236	0	1.5499
AT4G09800	RPS18C.2	5.67e-241	0.141092	0.864	0.626	1.86e-236	0	1.38019
AT5G56170	LLG1	6.67e-241	0.11763	0.593	0.372	2.19e-236	0	1.59409
AT3G04400	RPL23A.1	9.76e-241	0.161682	0.962	0.775	3.21e-236	0	1.24129
AT5G59880	ADF3	1.42e-240	0.0410676	0.813	0.587	4.66e-236	0	1.38501
AT5G66055	AKRP	1.45e-240	0.178475	0.298	0.107	4.75e-236	0	2.78505
AT5G43830	AT5G43830	2.08e-240	0.194575	0.457	0.231	6.83e-236	0	1.97835
AT1G14270	AT1G14270	3.46e-240	0.179132	0.302	0.108	1.14e-235	0	2.7963
AT2G24270	ALDH11A3	1.16e-239	0.184205	0.403	0.19	3.81e-235	0	2.12105
AT1G31160	HINT 2	1.35e-239	0.215993	0.327	0.119	4.43e-235	0	2.7479
AT5G64130	AT5G64130	1.63e-239	0.123127	0.905	0.676	5.36e-235	0	1.33876
AT3G04640	AT3G04640	2.45e-239	0.462133	0.895	0.675	8.03e-235	0	1.32593
AT1G12440	SAP1	7.3e-239	0.235359	0.697	0.438	2.4e-234	0	1.59132
AT1G52670	AT1G52670	1.11e-238	0.189304	0.3	0.103	3.65e-234	0	2.91262
ATCG00670	CLPP1	1.16e-238	0.109589	0.643	0.417	3.8e-234	0	1.54197
AT1G27400	RPL17A	1.38e-238	0.253804	0.832	0.565	4.54e-234	0	1.47257
AT1G71697	CK1	1.52e-238	0.41998	0.86	0.625	4.98e-234	0	1.376
ATCG00040	MATK	1.86e-238	0.214332	0.928	0.719	6.11e-234	0	1.29068
AT3G62410	CP12-2	2.01e-238	0.430322	0.545	0.258	6.59e-234	0	2.1124
AT4G13520	SMAP1	2.11e-238	0.18698	0.642	0.405	6.91e-234	0	1.58519
AT1G48450	AT1G48450	3.02e-238	0.209486	0.622	0.378	9.92e-234	0	1.6455
AT1G76010	AT1G76010	5.45e-238	0.191687	0.765	0.504	1.79e-233	0	1.51786
AT5G64860	DPE1	7.48e-238	0.173561	0.255	0.077	2.45e-233	0	3.31169
AT3G06780	AT3G06780	1.53e-237	0.227203	0.583	0.336	5.01e-233	0	1.73512
AT2G33370	RPL23A.2	2.17e-237	0.0679606	0.751	0.519	7.13e-233	0	1.44701
AT5G47890	AT5G47890	2.97e-237	0.123815	0.658	0.43	9.76e-233	0	1.53023
AT2G20860	LIP1.3	5.03e-237	0.219477	0.699	0.445	1.65e-232	0	1.57079
AT4G31310	AT4G31310	1e-236	0.180484	0.318	0.123	3.29e-232	0	2.58537
AT1G15930	RPS12A	1.03e-236	0.179961	0.9	0.656	3.4e-232	0	1.37195
AT5G63470	NFYC4	1.9e-236	0.20743	0.39	0.175	6.25e-232	0	2.22857
AT4G20150	AT4G20150	6.99e-236	0.127838	0.755	0.519	2.3e-231	0	1.45472
AT1G43170	ARP1	7.05e-236	0.0847626	0.932	0.722	2.31e-231	0	1.29086
AT2G23390	AT2G23390	9.31e-236	0.183191	0.27	0.083	3.06e-231	0	3.25301
AT2G35830	AT2G35830	1.12e-235	0.227978	0.378	0.16	3.68e-231	0	2.3625
AT5G62720	AT5G62720	1.12e-235	0.20921	0.566	0.316	3.69e-231	0	1.79114
AT5G48810	CYTB5-D	1.37e-235	0.19849	0.735	0.482	4.51e-231	0	1.5249
AT2G03870	LSM7	1.87e-235	0.177428	0.418	0.206	6.13e-231	0	2.02913
AT5G65430	GRF8	1.93e-235	0.197188	0.851	0.592	6.34e-231	0	1.4375
AT5G42030	ABIL4	2.43e-235	0.17945	0.253	0.073	7.98e-231	0	3.46575
AT4G18950	AT4G18950	9.2e-235	0.384936	0.93	0.728	3.02e-230	0	1.27747
AT1G63830	AT1G63830	9.64e-235	0.231851	0.743	0.481	3.16e-230	0	1.5447
AT1G49500	AT1G49500	1.94e-234	0.299445	0.626	0.345	6.38e-230	0	1.81449
AT1G64230	UBC28	5.76e-234	0.252619	0.897	0.663	1.89e-229	0	1.35294
AT1G36320	AT1G36320	9.73e-234	0.19854	0.461	0.244	3.2e-229	0	1.88934
AT5G51020	CRL	1.28e-233	0.193409	0.323	0.123	4.21e-229	0	2.62602
AT1G52740	HTA9	1.69e-233	0.0134779	0.873	0.665	5.54e-229	0	1.31278
AT1G27450	APT1	2.9e-233	0.199941	0.593	0.358	9.54e-229	0	1.65642
AT3G62720	XXT1	5.4e-233	0.024363	0.447	0.28	1.77e-228	0	1.59643
AT3G27690	LHCB2.4	7.55e-233	0.563632	0.275	0.065	2.48e-228	0	4.23077
AT1G56140	AT1G56140	8.7e-233	0.0209374	0.338	0.179	2.86e-228	0	1.88827
AT5G16130	RPS7C	9.02e-233	0.198938	0.807	0.542	2.96e-228	0	1.48893
AT4G29780	AT4G29780	9.58e-233	0.335918	0.798	0.542	3.15e-228	0	1.47232
AT2G26080	GLDP2	1.1e-232	0.192661	0.309	0.108	3.6e-228	0	2.86111
AT3G02770	AT3G02770	1.45e-232	0.187442	0.339	0.136	4.76e-228	0	2.49265
AT1G74960	KAS2	4.15e-232	0.171606	0.349	0.152	1.36e-227	0	2.29605
AT4G25650	PTC52	2.26e-231	0.197007	0.419	0.201	7.42e-227	0	2.08458
AT1G69620	RPL34B	4.34e-231	0.128021	0.944	0.742	1.43e-226	0	1.27224
AT2G41420	WIH2	3.38e-230	0.210687	0.925	0.704	1.11e-225	0	1.31392
AT5G10460	AT5G10460	4.17e-230	0.156943	0.261	0.089	1.37e-225	0	2.93258
AT1G53670	MSRB1	6.19e-230	0.197425	0.503	0.276	2.03e-225	0	1.82246
AT2G17340	AT2G17340	8.18e-230	0.177349	0.294	0.105	2.69e-225	0	2.8
AT4G18730	RPL11C.2	8.25e-230	0.161194	0.842	0.587	2.71e-225	0	1.43441
ATCG00710	PSBH	2.37e-229	0.0898181	0.447	0.251	7.79e-225	0	1.78088
AT1G58200	MSL3	3.31e-229	0.135748	0.346	0.159	1.09e-224	0	2.1761
AT4G30920	LAP2	7.14e-229	0.234854	0.471	0.238	2.34e-224	0	1.97899
AT5G02710	AT5G02710	1.59e-228	0.179498	0.288	0.102	5.21e-224	0	2.82353
AT5G23440	FTRA1	1.81e-228	0.184684	0.365	0.168	5.95e-224	0	2.17262
AT4G00100	RPS13B	2.75e-228	0.0703733	0.907	0.695	9.02e-224	0	1.30504
AT1G67785	AT1G67785	4.19e-228	0.112994	0.548	0.35	1.38e-223	0	1.56571
AT1G07135	AT1G07135	1.59e-227	0.262985	0.879	0.633	5.21e-223	0	1.38863
AT5G28060	RPS24B	4.78e-227	0.0999465	0.901	0.679	1.57e-222	0	1.32695
AT5G03240	UBQ3	1.32e-226	0.336094	0.973	0.831	4.34e-222	0	1.17088
AT3G58680	MBF1B	1.38e-226	0.245665	0.944	0.733	4.54e-222	0	1.28786
AT1G55450	AT1G55450	1.65e-226	0.30036	0.661	0.38	5.43e-222	0	1.73947
AT4G36390	AT4G36390	7.24e-226	0.179185	0.313	0.122	2.38e-221	0	2.56557
AT4G24930	AT4G24930	9.34e-226	0.104748	0.645	0.425	3.07e-221	0	1.51765
AT5G06320	NHL3	1.76e-225	0.169904	0.937	0.779	5.77e-221	0	1.20282
AT5G10450	GRF6	3.28e-225	0.168063	0.848	0.605	1.08e-220	0	1.40165
ATCG00270	PSBD	1.76e-224	0.0318136	0.546	0.359	5.77e-220	0	1.52089
AT5G48335	AT5G48335	1.87e-224	0.205859	0.445	0.226	6.13e-220	0	1.96903
AT4G31800	WRKY18	2.24e-224	0.231893	0.556	0.296	7.35e-220	0	1.87838
AT3G09200	RPP0B	5.72e-224	0.192098	0.88	0.635	1.88e-219	0	1.38583
AT5G02450	RPL36C	6.19e-224	0.0303366	0.891	0.683	2.03e-219	0	1.30454
AT2G36160	RPS14A	9.43e-224	0.144298	0.891	0.658	3.1e-219	0	1.3541
ATCG00190	RPOB	3.88e-223	0.150965	0.56	0.336	1.27e-218	0	1.66667
AT2G44060	AT2G44060	4.33e-223	0.208273	0.495	0.267	1.42e-218	0	1.85393
AT1G04630	MEE4	4.42e-223	0.14892	0.446	0.248	1.45e-218	0	1.79839
AT1G09690	RPL21A.1	4.87e-223	0.0621598	0.925	0.72	1.6e-218	0	1.28472
AT1G17650	GLYR2	1.03e-222	0.170898	0.276	0.091	3.39e-218	0	3.03297
AT4G16830	RGGA	1.23e-222	0.203453	0.54	0.316	4.03e-218	0	1.70886
AT2G33220	AT2G33220	1.53e-222	0.142686	0.672	0.45	5.04e-218	0	1.49333
AT4G14960	TUBA6	1.92e-222	0.285594	0.526	0.273	6.3e-218	0	1.92674
ATCG01010	NDHF	2.02e-222	0.102215	0.803	0.568	6.64e-218	0	1.41373
AT1G57720	AT1G57720	2.17e-222	0.223409	0.725	0.467	7.12e-218	0	1.55246
AT2G41630	TFIIB1	5.81e-222	0.326103	0.611	0.347	1.91e-217	0	1.76081
AT2G40600	AT2G40600	1.4e-221	0.201761	0.299	0.105	4.59e-217	0	2.84762
AT5G63670	SPT42	1.87e-221	0.167964	0.501	0.293	6.13e-217	0	1.7099
AT3G49870	ARL8A	3.01e-221	0.153204	0.582	0.361	9.87e-217	0	1.61219
AT5G47435	PURU1	4.19e-221	0.221865	0.539	0.302	1.38e-216	0	1.78477
AT4G31390	ABC1K1	4.2e-221	0.147771	0.286	0.114	1.38e-216	0	2.50877
AT1G64720	CP5	6.75e-221	0.271563	0.956	0.789	2.22e-216	0	1.21166
AT3G16100	RABG3C	7.69e-221	0.193046	0.346	0.144	2.53e-216	0	2.40278
AT4G11600	GPX6	1.09e-220	0.466915	0.971	0.875	3.6e-216	0	1.10971
AT4G16720	RPL15A	1.77e-220	0.097625	0.877	0.653	5.8e-216	0	1.34303
AT2G01250	RPL7B	1.8e-220	0.0351763	0.816	0.598	5.91e-216	0	1.36455
AT5G15200	RPS9B	1.8e-220	0.256744	0.979	0.837	5.92e-216	0	1.16965
AT1G66200	ATGSR2	1.97e-220	0.124789	0.536	0.312	6.48e-216	0	1.71795
AT4G33865	RPS29C.2	2.16e-220	0.0165769	0.835	0.626	7.11e-216	0	1.33387
AT3G02720	DJ1D	3.16e-220	0.173989	0.34	0.149	1.04e-215	0	2.28188
AT1G23710	AT1G23710	6.81e-220	0.400068	0.94	0.759	2.24e-215	0	1.23847
AT3G24830	RPL13AB	8.11e-220	0.0645482	0.876	0.661	2.66e-215	0	1.32526
AT1G20260	VHA-B3	1.02e-219	0.17977	0.402	0.202	3.33e-215	0	1.9901
AT1G36980	AT1G36980	1.07e-219	0.0576445	0.796	0.59	3.5e-215	0	1.34915
ATCG01090	NDHI	2.07e-219	0.102727	0.485	0.289	6.8e-215	0	1.6782
AT5G17710	EMB1241	1.49e-218	0.171173	0.695	0.459	4.91e-214	0	1.51416
AT5G27700	RPS21C	2.33e-218	0.110917	0.878	0.649	7.65e-214	0	1.35285
AT1G52720	AT1G52720	2.78e-218	0.21598	0.328	0.124	9.11e-214	0	2.64516
AT2G37340	RS2Z33	4.33e-218	0.139528	0.565	0.352	1.42e-213	0	1.60511
AT5G26570	GWD3	6.86e-218	0.196404	0.263	0.08	2.25e-213	0	3.2875
AT4G37040	MAP1D	2.68e-217	0.17098	0.3	0.119	8.8e-213	0	2.52101
AT3G11940	RPS5B	2.82e-217	0.152008	0.939	0.73	9.26e-213	0	1.2863
AT4G25170	AT4G25170	3.86e-217	0.261292	0.711	0.453	1.27e-212	0	1.56954
AT3G10920	MSD1	1.84e-216	0.0359923	0.831	0.621	6.03e-212	0	1.33816
AT5G52650	RPS10C	2.05e-216	0.0794435	0.81	0.584	6.72e-212	0	1.38699
AT5G01350	AT5G01350	5.01e-216	0.0993174	0.914	0.697	1.64e-211	0	1.31133
ATCG00640	RPL33	7.24e-216	0.177208	0.448	0.235	2.38e-211	0	1.90638
AT5G49970	PPOX1	1.39e-215	0.166918	0.295	0.118	4.55e-211	0	2.5
AT5G46430	RPL32B	8.48e-215	0.0178386	0.772	0.565	2.78e-210	0	1.36637
AT5G59613	AT5G59613	9.83e-215	0.0172338	0.766	0.562	3.23e-210	0	1.36299
AT2G47070	SPL1.1	1.06e-214	0.156934	0.34	0.148	3.48e-210	0	2.2973
AT4G39200	RPS25E	1.21e-214	0.197941	0.974	0.807	3.98e-210	0	1.20694
AT3G11510	RPS14B	2.87e-214	0.0550472	0.876	0.663	9.43e-210	0	1.32127
AT3G17020	AT3G17020	4.77e-214	0.211052	0.754	0.5	1.57e-209	0	1.508
AT4G13590	PAM71-HL	6.71e-214	0.121294	0.358	0.188	2.2e-209	0	1.90426
AT4G16860	RPP4	7.25e-214	0.16817	0.281	0.103	2.38e-209	0	2.72816
AT1G65930	CICDH	7.93e-214	0.225369	0.735	0.477	2.6e-209	0	1.54088
AT1G75440	UBC16	2.07e-213	0.207824	0.348	0.146	6.79e-209	0	2.38356
AT2G06530	VPS2.1	2.21e-213	0.179387	0.713	0.476	7.27e-209	0	1.4979
AT3G50950	RPP13L4	3.39e-213	0.325651	0.525	0.282	1.11e-208	0	1.8617
AT4G32915	GATC	3.65e-213	0.172618	0.384	0.189	1.2e-208	0	2.03175
AT4G15545	AT4G15545	3.67e-213	0.169312	0.655	0.421	1.2e-208	0	1.55582
AT5G02500	MED37E	3.88e-213	0.0484015	0.945	0.755	1.27e-208	0	1.25166
ATCG01060	PSAC	1.35e-212	0.0572825	0.475	0.286	4.45e-208	0	1.66084
ATCG00160	RPS2.2	1.58e-212	0.143107	0.535	0.322	5.19e-208	0	1.66149
AT4G25130	MSR4	1.79e-212	0.0104565	0.788	0.588	5.89e-208	0	1.34014
AT1G01100	RPP1A	1.89e-212	0.0605942	0.924	0.727	6.21e-208	0	1.27098
AT5G19510	AT5G19510	2.6e-212	0.170113	0.931	0.718	8.54e-208	0	1.29666
AT1G22850	AT1G22850	2.85e-212	0.159708	0.298	0.121	9.37e-208	0	2.46281
AT3G25520	ATL5	2.9e-212	0.1306	0.868	0.635	9.54e-208	0	1.36693
AT5G48220	AT5G48220	3.6e-212	0.162949	0.26	0.089	1.18e-207	0	2.92135
AT4G01800	AGY1	4.91e-212	0.176282	0.368	0.169	1.61e-207	0	2.17751
AT1G29340	PUB17	5.93e-212	0.156485	0.625	0.407	1.95e-207	0	1.53563
AT5G66070	AT5G66070	6.27e-212	0.1012	0.625	0.417	2.06e-207	0	1.4988
AT2G31890	RAP	2.33e-211	0.171093	0.266	0.089	7.66e-207	0	2.98876
AT2G03390	CLPF	5.75e-211	0.203205	0.285	0.099	1.89e-206	0	2.87879
AT4G09670	AT4G09670	7.61e-211	0.157763	0.262	0.096	2.5e-206	0	2.72917
AT5G60540	PDX2	1.11e-210	0.217254	0.523	0.299	3.63e-206	0	1.74916
AT1G54630	ACP3	1.38e-210	0.101074	0.705	0.478	4.53e-206	0	1.4749
AT5G10810	ATER	1.51e-210	0.164457	0.345	0.158	4.95e-206	0	2.18354
AT5G44340	TUBB4	1.93e-210	0.207231	0.616	0.378	6.33e-206	0	1.62963
AT1G48030	LPD1	2.18e-210	0.236778	0.593	0.364	7.16e-206	0	1.62912
AT1G48520	GATB	2.2e-210	0.184311	0.302	0.118	7.21e-206	0	2.55932
AT2G45990	AT2G45990	2.79e-210	0.185036	0.444	0.236	9.14e-206	0	1.88136
AT4G09320	NDK1	4.14e-210	0.0122386	0.842	0.638	1.36e-205	0	1.31975
AT5G42190	SKP1B	5.49e-210	0.140092	0.6	0.386	1.8e-205	0	1.5544
AT1G70730	PGM2	6.1e-210	0.156251	0.357	0.175	2e-205	0	2.04
AT2G43945	AT2G43945	6.77e-210	0.173083	0.465	0.264	2.22e-205	0	1.76136
AT3G55170	RPL35C	7.91e-210	0.162525	0.419	0.223	2.6e-205	0	1.87892
AT5G55160	SUM2	3.05e-208	0.11911	0.512	0.32	1e-203	0	1.6
AT3G46630	AT3G46630	6.86e-208	0.159786	0.256	0.088	2.25e-203	0	2.90909
AT3G07650	COL9	7.11e-208	0.238473	0.566	0.332	2.34e-203	0	1.70482
AT4G33940	AT4G33940	9.96e-208	0.184279	0.514	0.298	3.27e-203	0	1.72483
AT4G30550	GGP3	1.64e-207	0.188091	0.351	0.16	5.4e-203	0	2.19375
AT5G22510	INVE	2.8e-207	0.158243	0.316	0.142	9.21e-203	0	2.22535
AT5G44650	Y3IP1	4.34e-207	0.174086	0.289	0.107	1.43e-202	0	2.70093
AT1G21930	AT1G21930	5.93e-207	0.181399	0.282	0.102	1.95e-202	0	2.76471
AT5G12320	AT5G12320	1.3e-206	0.13054	0.257	0.097	4.28e-202	0	2.64948
AT2G37480	AT2G37480	3.19e-206	0.165495	0.459	0.253	1.05e-201	0	1.81423
AT3G02780	IPP2	3.21e-206	0.136224	0.573	0.368	1.05e-201	0	1.55707
AT5G52520	OVA6	6.79e-206	0.1583	0.274	0.102	2.23e-201	0	2.68627
AT3G27925	DEGP1	1.6e-205	0.155756	0.365	0.182	5.26e-201	0	2.00549
AT5G37360	AT5G37360	1.61e-205	0.205398	0.327	0.135	5.27e-201	0	2.42222
AT4G26860	AT4G26860	2.38e-205	0.174982	0.351	0.16	7.81e-201	0	2.19375
AT3G48360	BT2	6.07e-205	0.45334	0.909	0.697	1.99e-200	0	1.30416
AT3G02560	RPS7B	6.64e-205	0.0273035	0.791	0.585	2.18e-200	0	1.35214
AT4G10030	AT4G10030	1.28e-204	0.205557	0.379	0.177	4.2e-200	0	2.14124
AT4G15802	HSBP	1.74e-204	0.148621	0.683	0.462	5.7e-200	0	1.47835
AT3G25860	LTA2	9.45e-204	0.165806	0.276	0.103	3.1e-199	0	2.67961
AT3G44190	AT3G44190	1.75e-203	0.575559	0.772	0.543	5.76e-199	0	1.42173
AT4G24280	HSP70-6	1.97e-203	0.193994	0.694	0.459	6.47e-199	0	1.51198
AT3G58140	AT3G58140	3.15e-203	0.151578	0.279	0.113	1.03e-198	0	2.46903
AT3G55460	SCL30.1	3.27e-203	0.169348	0.473	0.266	1.07e-198	0	1.7782
AT5G36230	AT5G36230	1.21e-202	0.164229	0.398	0.206	3.96e-198	0	1.93204
AT1G20696	HMGB3	2.56e-202	0.0530383	0.711	0.5	8.39e-198	0	1.422
AT4G38490	AT4G38490	2.86e-202	0.194634	0.31	0.125	9.4e-198	0	2.48
AT5G62390	BAG7	3.52e-202	0.155985	0.549	0.333	1.15e-197	0	1.64865
AT2G14910	AT2G14910	5.26e-202	0.0912648	0.757	0.536	1.73e-197	0	1.41231
AT5G04140	GLU1	2.35e-201	0.238405	0.64	0.399	7.71e-197	0	1.60401
AT2G15290	TIC21	5.01e-201	0.146887	0.283	0.116	1.64e-196	0	2.43966
AT3G10620	NUDT26	1.22e-200	0.186777	0.383	0.189	4.01e-196	0	2.02646
AT1G01790	KEA1	1.3e-200	0.139646	0.298	0.132	4.26e-196	0	2.25758
AT3G07195	AT3G07195	2.01e-200	0.492763	0.452	0.208	6.59e-196	0	2.17308
ATCG01130	YCF1.2	4.07e-200	0.0712935	0.837	0.624	1.34e-195	0	1.34135
AT5G49940	NIFU2	5.59e-200	0.158739	0.687	0.461	1.84e-195	0	1.49024
AT3G14600	RPL18AC	1.07e-199	0.0575951	0.794	0.58	3.51e-195	0	1.36897
AT2G40510	RPS26B	1.44e-199	0.121805	0.765	0.535	4.72e-195	0	1.42991
AT5G24690	AT5G24690	3.91e-199	0.196766	0.453	0.251	1.28e-194	0	1.80478
AT1G17100	AT1G17100	4.06e-199	0.132919	0.329	0.154	1.33e-194	0	2.13636
AT5G67590	FRO1.1	4.8e-199	0.0340107	0.653	0.473	1.58e-194	0	1.38055
AT5G53850	AT5G53850	1.32e-198	0.163179	0.378	0.193	4.32e-194	0	1.95855
AT5G64310	AGP1	1.55e-198	0.560884	0.983	0.92	5.09e-194	0	1.06848
AT3G16950	LPD1.1	1.66e-198	0.176352	0.336	0.154	5.44e-194	0	2.18182
AT1G23490	ARF2-A	2.42e-198	0.0165682	0.935	0.76	7.95e-194	0	1.23026
AT2G32150	AT2G32150	7.38e-198	0.242369	0.763	0.508	2.42e-193	0	1.50197
AT1G53560	AT1G53560	1.22e-197	0.149707	0.507	0.299	4.01e-193	0	1.69565
AT4G27090	RPL14B	1.54e-197	0.0905417	0.968	0.8	5.06e-193	0	1.21
AT5G58560	FOLK	2.16e-197	0.105176	0.268	0.119	7.08e-193	0	2.2521
AT1G71950	AT1G71950	4.22e-197	0.176166	0.86	0.634	1.39e-192	0	1.35647
AT2G14890	AGP9	5.26e-197	0.113741	0.286	0.12	1.73e-192	0	2.38333
AT5G23240	DJC76	6.25e-197	0.175507	0.258	0.088	2.05e-192	0	2.93182
AT3G51140	AT3G51140	1.17e-196	0.137997	0.305	0.138	3.86e-192	0	2.21014
AT4G34700	CIB22	2.03e-196	0.0156722	0.719	0.528	6.66e-192	0	1.36174
AT5G16150	GLT1	2.31e-196	0.123288	0.479	0.29	7.59e-192	0	1.65172
AT3G07880	GDI1	3.4e-196	0.177943	0.456	0.254	1.12e-191	0	1.79528
AT3G54360	NCA1	4.59e-196	0.129213	0.566	0.372	1.51e-191	0	1.52151
AT3G50830	COR413PM2	7.19e-196	0.0240933	0.364	0.229	2.36e-191	0	1.58952
AT4G34670	RPS3AB	1.81e-195	0.0619	0.722	0.511	5.93e-191	0	1.41292
AT1G16240	SYP51	3.78e-195	0.128761	0.715	0.505	1.24e-190	0	1.41584
AT1G66430	AT1G66430	6.49e-195	0.192353	0.335	0.148	2.13e-190	0	2.26351
AT5G39740	RPL5B	8.08e-195	0.0518962	0.775	0.565	2.65e-190	0	1.37168
AT4G33250	TIF3K1	1.34e-194	0.109392	0.691	0.471	4.4e-190	0	1.46709
AT5G45170	AT5G45170	1.77e-194	0.171796	0.362	0.175	5.8e-190	0	2.06857
AT1G66670	CLPP3	2.26e-194	0.127202	0.438	0.266	7.44e-190	0	1.64662
AT3G01910	SOX	4.56e-194	0.191776	0.489	0.279	1.5e-189	0	1.75269
AT1G78140	AT1G78140	4.64e-194	0.161918	0.354	0.174	1.52e-189	0	2.03448
AT4G27350	AT4G27350	5.52e-194	0.232994	0.602	0.377	1.81e-189	0	1.59682
AT4G02450	P23-1	5.61e-194	0.0572813	0.727	0.519	1.84e-189	0	1.40077
AT2G40000	HSPRO2	5.67e-194	0.349521	0.99	0.947	1.86e-189	0	1.04541
AT4G39980	DHS1	6.86e-194	0.168287	0.317	0.137	2.25e-189	0	2.31387
AT1G74520	HVA22A	2.26e-193	0.107689	0.259	0.11	7.43e-189	0	2.35455
AT3G08580	AAC1	3.61e-193	0.109748	0.809	0.589	1.19e-188	0	1.37351
AT2G44870	AT2G44870	5.22e-193	0.142872	0.531	0.34	1.71e-188	0	1.56176
AT4G09830	AT4G09830	5.78e-193	0.188585	0.59	0.37	1.9e-188	0	1.59459
AT2G35410	AT2G35410	1.08e-192	0.191679	0.388	0.192	3.55e-188	0	2.02083
AT2G02760	UBC2	1.72e-192	0.066132	0.791	0.576	5.64e-188	0	1.37326
AT1G57860	RPL21E.1	1.76e-192	0.0625626	0.646	0.442	5.79e-188	0	1.46154
AT3G01520	AT3G01520	3.58e-192	0.239782	0.614	0.378	1.18e-187	0	1.62434
AT5G14800	PROC1	4.33e-192	0.00166765	0.702	0.513	1.42e-187	0	1.36842
AT2G45770	CPFTSY	6.21e-192	0.158776	0.289	0.119	2.04e-187	0	2.42857
AT1G09660	AT1G09660	7.84e-192	0.166667	0.257	0.089	2.57e-187	0	2.88764
AT3G09820	ADK1.1	8.61e-192	0.0845414	0.32	0.171	2.83e-187	0	1.87135
AT4G39670	AT4G39670	9.25e-192	0.397829	0.819	0.82	3.04e-187	0	0.99878
AT1G01320	AT1G01320	1.54e-191	0.182745	0.408	0.207	5.07e-187	0	1.97101
AT1G07110	FKFBP	1.73e-191	0.182458	0.31	0.129	5.68e-187	0	2.4031
AT4G25670	AT4G25670	2.78e-191	0.372977	0.869	0.659	9.11e-187	0	1.31866
AT2G34470	UREG	3.58e-191	0.180478	0.344	0.161	1.17e-186	0	2.13665
AT4G00895	AT4G00895	5.97e-191	0.201037	0.594	0.368	1.96e-186	0	1.61413
AT2G43970	LARP6B	1.45e-190	0.0858972	0.742	0.533	4.77e-186	0	1.39212
AT5G17230	PSY	1.67e-190	0.180667	0.297	0.123	5.48e-186	0	2.41463
AT2G27720	AT2G27720	2.13e-190	0.117892	0.921	0.72	6.99e-186	0	1.27917
AT5G09960	AT5G09960	3.09e-190	0.135186	0.254	0.1	1.01e-185	0	2.54
AT1G10830	Z-ISO	3.12e-189	0.0768983	0.273	0.142	1.02e-184	0	1.92254
AT4G32030	AT4G32030	3.21e-189	0.148642	0.482	0.288	1.05e-184	0	1.67361
AT2G45980	ATI1	4e-189	0.150656	0.6	0.395	1.31e-184	0	1.51899
AT3G25470	AT3G25470	4.88e-189	0.162208	0.375	0.194	1.6e-184	0	1.93299
AT5G08670	AT5G08670	5.16e-189	0.106453	0.548	0.362	1.69e-184	0	1.51381
AT3G19170	PREP1	1.05e-188	0.132577	0.343	0.176	3.44e-184	0	1.94886
AT3G26520	TIP1-2	3.1e-188	0.0308328	0.72	0.503	1.02e-183	0	1.43141
AT1G24360	AT1G24360	4.37e-188	0.193431	0.512	0.306	1.43e-183	0	1.6732
AT2G30200	AT2G30200	9e-188	0.157375	0.335	0.161	2.96e-183	0	2.08075
AT3G17390	METK4	1.22e-187	0.131136	0.696	0.469	3.99e-183	0	1.48401
AT3G07350	AT3G07350	2.55e-187	0.21221	0.398	0.186	8.38e-183	0	2.13978
AT1G16170	AT1G16170	7.25e-187	0.183621	0.297	0.122	2.38e-182	0	2.43443
AT4G34265	AT4G34265	2.2e-186	0.175385	0.629	0.416	7.24e-182	0	1.51202
AT1G67350	AT1G67350	2.4e-186	0.0169483	0.605	0.443	7.87e-182	0	1.36569
ATCG00770	RPS8	2.9e-186	0.1826	0.437	0.236	9.51e-182	0	1.85169
AT4G38470	STY46	3.09e-186	0.126802	0.416	0.233	1.02e-181	0	1.78541
AT5G04440	AT5G04440	3.66e-186	0.163892	0.337	0.16	1.2e-181	0	2.10625
AT2G32090	AT2G32090	4.23e-186	0.147079	0.33	0.157	1.39e-181	0	2.10191
AT2G29670	AT2G29670	8.2e-186	0.220895	0.279	0.098	2.69e-181	0	2.84694
AT5G04900	NOL	9.56e-186	0.153893	0.266	0.104	3.14e-181	0	2.55769
AT5G37850	SOS4	1.05e-185	0.142887	0.294	0.129	3.44e-181	0	2.27907
AT1G14810	AT1G14810	2.69e-185	0.17067	0.54	0.339	8.84e-181	0	1.59292
AT4G28730	GRXC5	1.05e-184	0.125446	0.31	0.154	3.44e-180	0	2.01299
AT3G52880	ATMDAR1	2.4e-184	0.0183388	0.675	0.498	7.88e-180	0	1.35542
AT5G12240	AT5G12240	5e-184	0.173118	0.39	0.206	1.64e-179	0	1.8932
AT2G30410	TFCA	8.27e-184	0.153073	0.406	0.224	2.72e-179	0	1.8125
AT1G27385	AT1G27385	1.47e-183	0.161255	0.497	0.309	4.82e-179	0	1.60841
AT1G02910	LPA1	2.17e-183	0.177762	0.399	0.212	7.11e-179	0	1.88208
AT5G50920	CLPC1	3.7e-183	0.155377	0.821	0.607	1.21e-178	0	1.35255
AT5G20290	RPS8A	5.95e-183	0.112929	0.96	0.794	1.95e-178	0	1.20907
AT2G25460	AT2G25460	6.55e-183	0.150827	0.425	0.224	2.15e-178	0	1.89732
AT1G11650	RBP45B	2.12e-182	0.0716074	0.744	0.54	6.97e-178	0	1.37778
AT1G27090	AT1G27090	3e-182	0.186786	0.471	0.276	9.85e-178	0	1.70652
AT1G74050	RPL6C	1.42e-181	0.102245	0.735	0.522	4.67e-177	0	1.40805
AT4G15560	DXS	1.82e-181	0.189092	0.381	0.191	5.98e-177	0	1.99476
AT1G27770	ACA1	3.7e-181	0.0695065	0.252	0.115	1.22e-176	0	2.1913
AT1G70090	GATL9	5.24e-181	0.0313242	0.357	0.214	1.72e-176	0	1.66822
AT5G03300	ADK2	5.61e-181	0.119183	0.257	0.111	1.84e-176	0	2.31532
AT5G61380	APRR1	6.12e-181	0.151073	0.397	0.213	2.01e-176	0	1.86385
AT3G13570	SCL30A	1.29e-179	0.17662	0.333	0.149	4.24e-175	0	2.2349
AT3G48560	ALS	2.64e-179	0.124945	0.549	0.364	8.66e-175	0	1.50824
AT4G27130	AT4G27130	3.61e-179	0.106037	0.796	0.575	1.19e-174	0	1.38435
AT1G71260	WHY2	4.49e-179	0.125336	0.294	0.139	1.47e-174	0	2.11511
AT5G43940	HOT5	5.77e-179	0.130488	0.702	0.483	1.89e-174	0	1.45342
AT3G10770	AT3G10770	1.45e-178	0.138976	0.573	0.384	4.77e-174	0	1.49219
AT1G16810	AT1G16810	1.54e-178	0.0457193	0.613	0.439	5.07e-174	0	1.39636
AT1G55160	AT1G55160	1.59e-178	0.128742	0.269	0.116	5.23e-174	0	2.31897
AT5G54540	AT5G54540	1.66e-178	0.14698	0.479	0.294	5.46e-174	0	1.62925
AT3G24120	AT3G24120	3.76e-178	0.172942	0.334	0.158	1.23e-173	0	2.11392
AT2G19790	AT2G19790	9.54e-178	0.177692	0.519	0.317	3.13e-173	0	1.63722
AT3G15900	AT3G15900	1.43e-177	0.140033	0.266	0.113	4.69e-173	0	2.35398
AT1G66260	ALY3	1.54e-177	0.155321	0.644	0.437	5.05e-173	0	1.47368
AT5G47570	AT5G47570	5.27e-177	0.0374694	0.673	0.491	1.73e-172	0	1.37067
AT5G01410	PDX13	6.28e-177	0.180955	0.756	0.529	2.06e-172	0	1.42911
AT5G21020	AT5G21020	7.92e-177	0.0363995	0.776	0.575	2.6e-172	0	1.34957
AT1G08200	AXS2	1.15e-176	0.109464	0.538	0.358	3.77e-172	0	1.50279
AT1G74920	ALDH10A8	2.43e-176	0.195567	0.439	0.244	7.99e-172	0	1.79918
AT3G57610	PURA	2.48e-176	0.109535	0.474	0.302	8.15e-172	0	1.56954
AT4G38220	AT4G38220	2.92e-176	0.0871076	0.252	0.12	9.58e-172	0	2.1
AT4G22780	ACR7	3.38e-175	0.158879	0.333	0.152	1.11e-170	0	2.19079
AT2G31800	AT2G31800	3.64e-175	0.164834	0.299	0.129	1.2e-170	0	2.31783
AT1G20580	SMD3B	5.04e-175	0.077201	0.556	0.377	1.66e-170	0	1.4748
AT3G55980	SZF1	2.88e-174	0.233559	0.689	0.45	9.46e-170	0	1.53111
AT5G52840	AT5G52840	3.39e-174	0.110329	0.504	0.329	1.11e-169	0	1.53191
AT4G33680	DAP	3.9e-174	0.152612	0.314	0.151	1.28e-169	0	2.07947
AT3G21350	MED6	1.19e-173	0.144463	0.304	0.148	3.91e-169	0	2.05405
AT5G58220	TTL	2.26e-173	0.15287	0.285	0.127	7.42e-169	0	2.24409
AT3G52590	RPL40B	3.77e-173	0.108507	0.961	0.803	1.24e-168	0	1.19676
AT1G33290	AT1G33290	4.3e-173	0.147346	0.253	0.1	1.41e-168	0	2.53
AT3G28900	RPL34C	5.58e-173	0.127512	0.639	0.428	1.83e-168	0	1.49299
AT3G12390	AT3G12390	1.53e-172	0.100948	0.483	0.313	5.04e-168	0	1.54313
AT3G49560	HP30-1	1.9e-172	0.173046	0.403	0.226	6.23e-168	0	1.78319
AT1G23740	AOR	3.34e-172	0.150114	0.293	0.128	1.1e-167	0	2.28906
AT4G24380	AT4G24380	3.89e-172	0.326914	0.824	0.595	1.28e-167	0	1.38487
AT5G09225	AT5G09225	5.5e-172	0.143746	0.448	0.273	1.81e-167	0	1.64103
AT4G30580	LPAT1	5.73e-172	0.16485	0.303	0.136	1.88e-167	0	2.22794
AT5G65940	CHY1	7.03e-172	0.126518	0.309	0.156	2.31e-167	0	1.98077
AT4G38550	AT4G38550	1.23e-171	0.142406	0.342	0.175	4.03e-167	0	1.95429
AT2G44490	BGLU26	1.44e-171	0.130961	0.69	0.469	4.72e-167	0	1.47122
AT2G47700	RFI2	1.7e-171	0.169324	0.463	0.269	5.59e-167	0	1.72119
AT5G20900	TIFY3B	2.56e-171	0.00665977	0.879	0.714	8.42e-167	0	1.23109
AT2G36130	CYP18-2	3.49e-171	0.136256	0.355	0.192	1.14e-166	0	1.84896
AT1G79075	AT1G79075	6.8e-171	0.127529	0.352	0.193	2.23e-166	0	1.82383
AT2G44620	MTACP1	1.31e-170	0.0386373	0.615	0.451	4.31e-166	0	1.36364
AT4G02580	AT4G02580	1.84e-170	0.126186	0.53	0.352	6.05e-166	0	1.50568
AT1G48830	RPS7A	9.02e-170	0.0456182	0.633	0.456	2.96e-165	0	1.38816
AT2G38470	WRKY33	1.2e-169	0.0520308	0.732	0.529	3.93e-165	0	1.38374
AT5G58720	PIPC	2.72e-169	0.189143	0.633	0.414	8.92e-165	0	1.52899
AT5G10160	AT5G10160	6.03e-169	0.127504	0.287	0.137	1.98e-164	0	2.09489
AT4G36010	AT4G36010	7.9e-169	0.365394	0.727	0.488	2.59e-164	0	1.48975
AT4G17230	SCL13	1.21e-168	0.167129	0.611	0.412	3.98e-164	0	1.48301
AT4G36800	RCE1	1.49e-168	0.0212206	0.659	0.489	4.9e-164	0	1.34765
AT5G18400	AT5G18400	1.65e-167	0.263402	0.822	0.606	5.42e-163	0	1.35644
ATCG00360	YCF3	1.72e-167	0.0405924	0.373	0.237	5.66e-163	0	1.57384
AT3G55770	AT3G55770	4.72e-167	0.0888966	0.668	0.475	1.55e-162	0	1.40632
AT4G03110	BRN1.1	1.64e-166	0.176232	0.266	0.098	5.38e-162	0	2.71429
AT2G21120	AT2G21120	1.72e-166	0.0443594	0.368	0.236	5.64e-162	0	1.55932
AT5G08540	AT5G08540	3.18e-166	0.13087	0.336	0.185	1.04e-161	0	1.81622
AT3G56010	AT3G56010	3.37e-166	0.150984	0.361	0.189	1.11e-161	0	1.91005
AT4G32020	AT4G32020	4.73e-166	0.0252843	0.837	0.745	1.55e-161	0	1.12349
AT1G19380	AT1G19380	7.06e-166	0.128828	0.598	0.388	2.32e-161	0	1.54124
AT1G31170	ATSRX	1.75e-165	0.11356	0.47	0.302	5.75e-161	0	1.55629
AT1G56045	RPL41G	1.78e-165	0.0353099	0.693	0.507	5.83e-161	0	1.36686
AT5G45775	RPL11C	2.61e-165	0.00798878	0.594	0.429	8.57e-161	0	1.38462
AT3G57320	AT3G57320	2.85e-165	0.113814	0.297	0.152	9.36e-161	0	1.95395
AT1G16920	RABA1B	3.33e-165	0.160258	0.343	0.17	1.09e-160	0	2.01765
AT2G47690	AT2G47690	4.62e-165	0.121912	0.363	0.204	1.52e-160	0	1.77941
AT3G60260	AT3G60260	1.61e-164	0.157731	0.329	0.159	5.29e-160	0	2.06918
AT3G60820	PBF1	1.77e-164	0.0156171	0.492	0.352	5.8e-160	0	1.39773
AT5G24520	TTG1	1.88e-164	0.124818	0.283	0.138	6.18e-160	0	2.05072
AT2G04039	AT2G04039	2.16e-164	0.148927	0.273	0.121	7.11e-160	0	2.2562
AT4G24972	TPD1	2.43e-164	0.220022	0.338	0.153	7.99e-160	0	2.20915
AT3G52870	IQM3	3.47e-164	0.114971	0.3	0.148	1.14e-159	0	2.02703
AT2G42310	AT2G42310	4.74e-164	0.0603071	0.599	0.435	1.56e-159	0	1.37701
AT1G11930	AT1G11930	7.03e-164	0.125717	0.38	0.223	2.31e-159	0	1.70404
AT4G14500	AT4G14500	8.48e-164	0.0198193	0.394	0.28	2.79e-159	0	1.40714
AT1G19740	AT1G19740	1.3e-163	0.162569	0.412	0.236	4.26e-159	0	1.74576
AT1G73030	CHMP1B	3.31e-163	0.125954	0.806	0.6	1.09e-158	0	1.34333
AT2G30020	AT2G30020	3.6e-163	0.144323	0.781	0.563	1.18e-158	0	1.38721
AT1G12780	UGE1	5.08e-163	0.00235508	0.475	0.318	1.67e-158	0	1.49371
AT5G41210	GSTT1	7.39e-163	0.114376	0.349	0.199	2.43e-158	0	1.75377
AT5G55710	TIC20-V	1.02e-162	0.135497	0.252	0.11	3.35e-158	0	2.29091
AT1G56070	LOS1	7.94e-162	0.070059	0.78	0.586	2.61e-157	0	1.33106
AT4G31720	TAF10	2.2e-161	0.141798	0.477	0.306	7.23e-157	0	1.55882
AT1G21130	IGMT4	2.86e-161	0.552823	0.337	0.14	9.4e-157	0	2.40714
AT3G61050	NTMC2TYPE4	3.28e-161	0.0393209	0.252	0.142	1.08e-156	0	1.77465
AT5G26880	AGL26	3.78e-161	0.164236	0.424	0.252	1.24e-156	0	1.68254
AT1G76180	ERD14	4.69e-161	0.409981	0.991	0.959	1.54e-156	0	1.03337
AT3G07470	AT3G07470	4.82e-161	0.0915813	0.399	0.237	1.58e-156	0	1.68354
AT2G46280	TIF3I1	2.69e-160	0.0225637	0.649	0.48	8.84e-156	0	1.35208
AT2G05100	LHCB2.1	2.91e-160	0.759858	0.417	0.268	9.54e-156	0	1.55597
AT3G24503	ALDH2C4	4.99e-160	0.117665	0.395	0.232	1.64e-155	0	1.70259
AT1G27510	EX2	5.24e-160	0.10262	0.359	0.216	1.72e-155	0	1.66204
AT3G42790	AL3	6.27e-160	0.0916366	0.595	0.419	2.06e-155	0	1.42005
AT1G02840	SR34	8.89e-160	0.0441973	0.475	0.329	2.92e-155	0	1.44377
AT1G23820	SPDSYN1	1.29e-159	0.172482	0.458	0.277	4.22e-155	0	1.65343
AT5G47040	LON2	1.8e-159	0.133598	0.284	0.133	5.9e-155	0	2.13534
AT3G50260	ERF011	3.24e-159	0.244979	0.686	0.454	1.06e-154	0	1.51101
AT4G30220	RUXF	3.5e-159	0.0431803	0.501	0.353	1.15e-154	0	1.41926
AT3G04630	WDL1	5.76e-159	0.257892	0.748	0.523	1.89e-154	0	1.43021
AT3G20390	AT3G20390	9.35e-159	0.0661666	0.744	0.535	3.07e-154	0	1.39065
AT4G19110	AT4G19110	9.94e-159	0.0538857	0.43	0.291	3.26e-154	0	1.47766
AT5G24650	HP30-2	1.28e-158	0.134778	0.372	0.211	4.22e-154	0	1.76303
AT5G11650	AT5G11650	1.57e-158	0.106864	0.258	0.117	5.15e-154	0	2.20513
AT5G57040	AT5G57040	1.58e-158	0.0581644	0.614	0.437	5.18e-154	0	1.40503
AT1G54740	AT1G54740	2.25e-158	0.153302	0.424	0.24	7.38e-154	0	1.76667
AT3G10970	AT3G10970	2.33e-158	0.116067	0.428	0.271	7.65e-154	0	1.57934
AT5G42380	CML37	2.39e-158	0.627979	0.664	0.436	7.85e-154	0	1.52294
AT2G40490	HEME2	3.15e-158	0.148687	0.278	0.128	1.03e-153	0	2.17188
AT4G13430	IIL1	3.27e-158	0.0337111	0.633	0.472	1.07e-153	0	1.3411
AT4G16500	CYS4	5.45e-158	0.23131	0.789	0.571	1.79e-153	0	1.38179
AT3G09830	PCRK1	5.76e-158	0.171941	0.283	0.123	1.89e-153	0	2.30081
AT1G22530	PATL2	7.64e-158	0.147267	0.413	0.24	2.51e-153	0	1.72083
AT5G17310	UGP1	1.21e-157	0.166426	0.282	0.125	3.97e-153	0	2.256
AT4G16155	LPD2.1	1.56e-157	0.111579	0.266	0.132	5.13e-153	0	2.01515
AT1G06190	AT1G06190	3.43e-157	0.116078	0.358	0.208	1.13e-152	0	1.72115
AT4G17170	RABB1C	3.43e-157	0.0323578	0.719	0.54	1.13e-152	0	1.33148
AT3G29350	AHP2	6.85e-157	0.0786171	0.354	0.217	2.25e-152	0	1.63134
AT5G65630	GTE7	6.9e-157	0.287598	0.397	0.19	2.27e-152	0	2.08947
AT2G39080	AT2G39080	4.66e-156	0.160276	0.361	0.195	1.53e-151	0	1.85128
AT5G59820	ZAT12	5.37e-156	0.346887	0.971	0.917	1.76e-151	0	1.05889
AT1G73540	NUDT21	8.56e-156	0.0823422	0.685	0.475	2.81e-151	0	1.44211
AT1G76600	AT1G76600	1.45e-155	0.391143	0.977	0.882	4.76e-151	0	1.10771
AT3G06730	CITRX	4.15e-155	0.136371	0.257	0.112	1.36e-150	0	2.29464
AT1G20050	HYD1	5.99e-155	0.0438366	0.26	0.15	1.97e-150	0	1.73333
AT1G70590	AT1G70590	7.98e-155	0.17951	0.371	0.195	2.62e-150	0	1.90256
AT1G32460	AT1G32460	1.44e-154	0.0274271	0.787	0.61	4.74e-150	0	1.29016
AT4G24160	AT4G24160	1.46e-154	0.239573	0.612	0.398	4.79e-150	0	1.53769
AT3G13470	CPN60B2	1.63e-154	0.169906	0.515	0.32	5.36e-150	0	1.60938
AT1G62780	AT1G62780	6.95e-154	0.168217	0.399	0.224	2.28e-149	0	1.78125
AT2G22450	RIBA2	9.91e-154	0.121487	0.276	0.134	3.25e-149	0	2.0597
AT2G33040	ATPC	1.53e-153	0.0466913	0.576	0.424	5.02e-149	0	1.35849
AT1G72930	TIR	1.74e-153	0.246687	0.333	0.144	5.72e-149	0	2.3125
AT2G36220	AT2G36220	1.81e-153	0.319354	0.951	0.807	5.94e-149	0	1.17844
AT2G18730	DGK3	2.43e-153	0.104216	0.295	0.158	7.98e-149	0	1.86709
AT2G30440	TPP1	2.72e-153	0.0384085	0.711	0.532	8.93e-149	0	1.33647
AT1G51730	AT1G51730	2.79e-153	0.11684	0.417	0.265	9.16e-149	0	1.57358
AT3G11500	AT3G11500	6.87e-153	0.107172	0.254	0.121	2.26e-148	0	2.09917
AT1G07920	A1	7.79e-153	0.125778	0.55	0.374	2.56e-148	0	1.47059
AT4G16520	ATG8F	8.47e-153	0.0403342	0.615	0.448	2.78e-148	0	1.37277
AT3G14290	PAE2.1	1.34e-152	0.075397	0.376	0.237	4.41e-148	0	1.5865
AT2G35390	PRS1	1.55e-152	0.0458975	0.513	0.373	5.09e-148	0	1.37534
AT2G30980	ASK6.1	3.16e-152	0.132527	0.27	0.128	1.04e-147	0	2.10938
AT1G01800	AT1G01800	3.65e-152	0.0444099	0.329	0.209	1.2e-147	0	1.57416
AT3G18820	RABG3F	1.32e-151	0.0371791	0.655	0.475	4.34e-147	0	1.37895
AT5G32450	AT5G32450	1.39e-151	0.163963	0.391	0.22	4.56e-147	0	1.77727
AT2G21290	AT2G21290	1.7e-151	0.0656852	0.526	0.364	5.58e-147	0	1.44505
AT2G24550	AT2G24550	3.87e-151	0.204387	0.543	0.337	1.27e-146	0	1.61128
AT3G10350	AT3G10350	5.54e-151	0.144156	0.339	0.187	1.82e-146	0	1.81283
AT5G36160	TAT	8.84e-151	0.146445	0.375	0.217	2.9e-146	0	1.72811
AT3G56680	AT3G56680	1.56e-150	0.0962303	0.573	0.406	5.12e-146	0	1.41133
AT1G01820	PEX11C	2.4e-150	0.118528	0.479	0.313	7.87e-146	0	1.53035
AT5G53300	UBC10	6.29e-150	0.132934	0.977	0.841	2.06e-145	0	1.16171
AT1G18450	ARP4	1.06e-149	0.0696125	0.262	0.151	3.48e-145	0	1.7351
AT2G18440	GUT15	1.13e-149	0.128745	0.765	0.566	3.72e-145	0	1.35159
AT5G19120	AT5G19120	1.38e-149	0.0497788	0.596	0.417	4.55e-145	0	1.42926
AT1G54580	ACP2	1.41e-149	0.197079	0.46	0.267	4.62e-145	0	1.72285
AT3G53580	DAPF	1.44e-149	0.104515	0.451	0.298	4.74e-145	0	1.51342
AT2G06010	ORG4	4.27e-149	0.151638	0.252	0.103	1.4e-144	0	2.4466
AT2G36060	MMZ3	7.18e-149	0.0416285	0.551	0.402	2.36e-144	0	1.37065
AT1G49970	CLPR1	1.32e-148	0.115716	0.57	0.392	4.33e-144	0	1.45408
AT2G35840	SPP2.1	1.65e-148	0.123785	0.275	0.134	5.43e-144	0	2.05224
AT2G28840	XBAT31	2.17e-148	0.00834082	0.617	0.461	7.13e-144	0	1.33839
AT3G06500	INVC	3.26e-148	0.233106	0.574	0.362	1.07e-143	0	1.58564
AT5G02290	PBL11	3.32e-148	0.0994731	0.357	0.212	1.09e-143	0	1.68396
AT5G20060	AT5G20060	5.26e-148	0.12239	0.393	0.245	1.73e-143	0	1.60408
AT1G76030	VHA-B1	6.11e-148	0.104844	0.428	0.277	2.01e-143	0	1.54513
AT2G27860	AXS1	1.69e-147	0.13646	0.566	0.381	5.56e-143	0	1.48556
AT2G18700	TPS11	2.95e-147	0.196327	0.629	0.424	9.69e-143	0	1.48349
AT2G42740	RPL11A	3.8e-147	0.093975	0.329	0.191	1.25e-142	0	1.72251
AT2G40590	RPS26A	9.16e-147	0.0627908	0.463	0.315	3.01e-142	0	1.46984
AT1G79210	PAB2	3.51e-146	0.0869862	0.404	0.258	1.15e-141	0	1.56589
AT4G26840	SUMO1	1.62e-145	0.0182744	0.46	0.338	5.32e-141	0	1.36095
AT5G06340	NUDT27	7.73e-145	0.072679	0.275	0.16	2.54e-140	0	1.71875
AT2G16586	AT2G16586	1.32e-144	0.155996	0.354	0.173	4.32e-140	0	2.04624
AT4G20380	LSD1	2.83e-144	0.155905	0.449	0.276	9.31e-140	0	1.62681
AT4G11260	SGT1B	4.2e-144	0.105393	0.453	0.3	1.38e-139	0	1.51
AT2G15580	AT2G15580	9.62e-144	0.101937	0.434	0.278	3.16e-139	0	1.56115
AT1G63970	ISPF	1.66e-143	0.127853	0.341	0.195	5.45e-139	0	1.74872
AT5G63370	CDKG1	2.57e-143	0.126618	0.561	0.386	8.43e-139	0	1.45337
AT2G23340	ERF008	3.91e-143	0.229112	0.398	0.21	1.28e-138	0	1.89524
AT2G46170	RTNLB5	4.02e-143	0.0458889	0.535	0.381	1.32e-138	0	1.4042
AT2G20120	COV1	4.84e-143	0.0802115	0.318	0.188	1.59e-138	0	1.69149
AT1G12580	PEPKR1	9.06e-143	0.0984955	0.32	0.185	2.97e-138	0	1.72973
AT1G10670	ACLA-1	3.46e-142	0.0773121	0.518	0.363	1.14e-137	0	1.427
AT1G76160	sks5	3.8e-142	0.0476428	0.372	0.24	1.25e-137	0	1.55
AT3G13580	RPL7D	7.17e-142	0.0709867	0.594	0.43	2.35e-137	0	1.3814
AT3G62120	AT3G62120	1.01e-141	0.106611	0.397	0.252	3.3e-137	0	1.5754
AT3G54660	EMB2360	2.06e-141	0.0412607	0.307	0.207	6.76e-137	0	1.48309
AT2G32200	AT2G32200	7.09e-141	0.301394	0.528	0.314	2.33e-136	0	1.68153
AT4G05150	AT4G05150	7.45e-141	0.108218	0.384	0.233	2.45e-136	0	1.64807
AT5G09770	AT5G09770	8.95e-141	0.0926856	0.295	0.166	2.94e-136	0	1.77711
AT3G06650	ACLB-1	1.91e-140	0.0568273	0.275	0.167	6.27e-136	0	1.64671
AT1G49950	TRB1	2.98e-140	0.147714	0.504	0.332	9.77e-136	0	1.51807
AT3G02900	AT3G02900	3.33e-140	0.0987285	0.49	0.334	1.09e-135	0	1.46707
AT1G55000	AT1G55000	4.02e-140	0.124131	0.389	0.234	1.32e-135	0	1.66239
AT2G17840	ERD7	5.94e-140	0.333509	0.867	0.678	1.95e-135	0	1.27876
AT3G08710	TRX9	6.23e-140	0.0761927	0.365	0.234	2.05e-135	0	1.55983
AT5G17990	PAT1.1	6.48e-140	0.0263697	0.267	0.169	2.13e-135	0	1.57988
AT2G40140	CZF1	8.81e-140	0.145285	0.808	0.604	2.89e-135	0	1.33775
AT2G34460	AT2G34460	1.03e-139	0.120648	0.389	0.233	3.38e-135	0	1.66953
AT5G46710	AT5G46710	4.31e-139	0.151209	0.322	0.166	1.42e-134	0	1.93976
ATCG00750	RPS11	4.38e-139	0.0514965	0.273	0.164	1.44e-134	0	1.66463
AT1G06200	AT1G06200	5.5e-139	0.00307126	0.509	0.392	1.81e-134	0	1.29847
AT4G25700	BETA-OHASE 1	1.27e-138	0.127128	0.485	0.319	4.18e-134	0	1.52038
AT3G56460	AT3G56460	2.05e-138	0.0839909	0.343	0.216	6.73e-134	0	1.58796
AT1G25550	HHO3	3.04e-138	0.0671238	0.697	0.514	9.99e-134	0	1.35603
AT3G51010	AT3G51010	3.07e-138	0.0744258	0.351	0.232	1.01e-133	0	1.51293
AT5G27280	AT5G27280	1.06e-137	0.168027	0.575	0.382	3.48e-133	0	1.50524
AT5G63510	GAMMA CAL1	1.07e-137	0.102964	0.268	0.138	3.52e-133	0	1.94203
AT5G66720	AT5G66720	1.24e-137	0.140765	0.353	0.205	4.07e-133	0	1.72195
AT2G33580	LYK5	2e-137	0.105303	0.276	0.136	6.55e-133	0	2.02941
AT3G52090	NRPB11	2.03e-137	0.0351455	0.396	0.283	6.67e-133	0	1.39929
AT5G25280	AT5G25280	3.09e-137	0.130973	0.58	0.385	1.01e-132	0	1.50649
AT5G60670	RPL12C	4.74e-137	0.0330189	0.409	0.272	1.56e-132	0	1.50368
AT4G05070	AT4G05070	5.54e-137	0.138994	0.664	0.467	1.82e-132	0	1.42184
AT5G11330	AT5G11330	6.88e-137	0.109715	0.254	0.131	2.26e-132	0	1.93893
AT4G13220	AT4G13220	1.06e-136	0.116966	0.256	0.124	3.48e-132	0	2.06452
AT4G14385	AT4G14385	4.41e-136	0.101126	0.349	0.217	1.45e-131	0	1.60829
AT3G46430	AT3G46430	4.92e-136	0.0280136	0.467	0.346	1.61e-131	0	1.34971
AT1G79230	STR1	7.58e-136	0.110403	0.352	0.215	2.49e-131	0	1.63721
AT3G24570	AT3G24570	8.42e-136	0.132627	0.296	0.156	2.77e-131	0	1.89744
AT3G54880	AT3G54880	8.8e-136	0.145676	0.329	0.174	2.89e-131	0	1.8908
AT1G69252	AT1G69252	1.08e-135	0.12181	0.481	0.316	3.55e-131	0	1.52215
AT4G31990	ASP5	1.26e-135	0.13732	0.389	0.24	4.13e-131	0	1.62083
AT3G60300	AT3G60300	4.59e-135	0.10368	0.638	0.46	1.51e-130	0	1.38696
AT1G12840	VHA-C	5.22e-135	0.016062	0.497	0.38	1.71e-130	0	1.30789
AT3G26980	MUB4	5.41e-135	0.164075	0.366	0.197	1.78e-130	0	1.85787
AT3G15780	AT3G15780	3.08e-134	0.133674	0.35	0.203	1.01e-129	0	1.72414
AT2G33340	PRP19B	3.63e-134	0.069687	0.426	0.298	1.19e-129	0	1.42953
AT5G16830	SYP21	5.14e-134	0.095357	0.615	0.446	1.69e-129	0	1.37892
AT4G22670	AtHip1	9.06e-134	0.133595	0.574	0.392	2.98e-129	0	1.46429
AT3G08010	ATAB2	2.13e-133	0.119547	0.251	0.123	7e-129	0	2.04065
AT3G04870	ZDS1	1.19e-132	0.0861059	0.267	0.152	3.9e-128	0	1.75658
AT1G04985	AT1G04985	4.94e-132	0.0683263	0.449	0.318	1.62e-127	0	1.41195
AT3G42150	AT3G42150	1.14e-131	0.115905	0.401	0.256	3.74e-127	0	1.56641
AT2G37600	RPL36A	1.77e-131	0.0308861	0.412	0.282	5.81e-127	0	1.46099
AT1G10600	AMSH2	2.16e-131	0.0896565	0.267	0.15	7.08e-127	0	1.78
AT2G07340	PFD1	4.95e-131	0.115615	0.342	0.201	1.63e-126	0	1.70149
AT5G49910	HSP70-7	6.66e-131	0.048635	0.552	0.397	2.19e-126	0	1.39043
AT5G03455	CDC25	7.22e-131	0.0665022	0.521	0.373	2.37e-126	0	1.39678
AT5G48760	RPL13AD	9.54e-131	0.0912612	0.524	0.359	3.13e-126	0	1.45961
AT4G39540	SK2	2.04e-130	0.107636	0.318	0.189	6.71e-126	0	1.68254
AT4G12790	AT4G12790	3.21e-130	0.074225	0.374	0.249	1.06e-125	0	1.50201
AT3G59980	AT3G59980	3.63e-130	0.119796	0.278	0.148	1.19e-125	0	1.87838
AT4G26400	AT4G26400	4.4e-130	0.17055	0.416	0.254	1.45e-125	0	1.6378
AT3G20340	AT3G20340	5.94e-130	0.345699	0.52	0.307	1.95e-125	0	1.69381
AT5G47240	atnudt8	6.12e-130	0.223229	0.317	0.144	2.01e-125	0	2.20139
AT3G21200	GLUTRBP	2.08e-129	0.145201	0.328	0.189	6.82e-125	0	1.73545
AT4G18590	RPA3B	2.36e-129	0.105396	0.286	0.16	7.76e-125	0	1.7875
AT5G24590	NAC091	2.53e-129	0.119377	0.398	0.245	8.29e-125	0	1.62449
AT4G32520	SHM3	5.02e-129	0.110472	0.296	0.169	1.65e-124	0	1.75148
AT2G34310	AT2G34310	1.03e-128	0.104885	0.392	0.247	3.39e-124	0	1.58704
AT5G66090	AT5G66090	1.24e-128	0.131598	0.271	0.136	4.07e-124	0	1.99265
AT3G21070	NADK1	1.46e-128	0.0721296	0.649	0.465	4.81e-124	0	1.3957
AT1G49140	AT1G49140	1.58e-128	0.0668671	0.483	0.343	5.19e-124	0	1.40816
AT3G15730	PLDALPHA1	1.7e-128	0.0150246	0.433	0.323	5.6e-124	0	1.34056
AT5G08530	CI51	2.87e-128	0.0805255	0.545	0.4	9.43e-124	0	1.3625
AT3G62260	AT3G62260	4.08e-128	0.162924	0.445	0.279	1.34e-123	0	1.59498
AT2G14260	PIP	7.64e-128	0.125113	0.294	0.163	2.51e-123	0	1.80368
AT5G62570	AT5G62570	2.36e-127	0.107274	0.392	0.248	7.76e-123	0	1.58065
AT5G63400	ADK1	3.72e-127	0.00522699	0.53	0.402	1.22e-122	0	1.31841
AT5G52040	ATRSP41	4.49e-127	0.00879374	0.551	0.421	1.47e-122	0	1.30879
AT2G37920	emb1513	8.06e-127	0.12014	0.29	0.16	2.64e-122	0	1.8125
AT1G22270	TRM112A	2.84e-126	0.00629655	0.414	0.315	9.32e-122	0	1.31429
AT2G17390	AKR2B	4.44e-126	0.0260231	0.517	0.395	1.46e-121	0	1.30886
AT5G08690	AT5G08690	4.74e-126	0.0438337	0.458	0.341	1.55e-121	0	1.34311
AT3G17770	AT3G17770	4.97e-126	0.102172	0.475	0.322	1.63e-121	0	1.47516
AT1G75330	OTC	5.34e-126	0.0707505	0.344	0.227	1.75e-121	0	1.51542
AT2G36895	AT2G36895	7.8e-126	0.0811042	0.391	0.266	2.56e-121	0	1.46992
AT5G01600	FER1	1.07e-125	0.657422	0.668	0.482	3.5e-121	0	1.38589
AT5G24735	AT5G24735	4.12e-125	0.115651	0.463	0.311	1.35e-120	0	1.48875
AT5G65260	PABN2	6.58e-125	0.0722285	0.399	0.28	2.16e-120	0	1.425
AT5G61210	SNAP33	8.51e-125	0.13336	0.715	0.532	2.8e-120	0	1.34398
AT1G49300	RABG3E	9.07e-125	0.0565173	0.468	0.346	2.98e-120	0	1.3526
AT3G51870	EAAC	1.26e-124	0.117365	0.276	0.146	4.14e-120	0	1.89041
AT1G07000	ATEXO70B2	1.56e-124	0.258494	0.633	0.425	5.13e-120	0	1.48941
AT3G23940	DHAD	1.69e-124	0.113825	0.252	0.129	5.55e-120	0	1.95349
AT1G78895	RTNLB22	2.7e-124	0.0968209	0.35	0.221	8.87e-120	0	1.58371
AT1G02140	MEE63	5.4e-124	0.0137124	0.597	0.466	1.77e-119	0	1.28112
AT5G61510	AT5G61510	5.62e-124	0.158462	0.363	0.212	1.85e-119	0	1.71226
AT4G29840	TS1	8.84e-124	0.0926746	0.421	0.288	2.9e-119	0	1.46181
AT4G33980	AT4G33980	9.83e-124	0.251205	0.472	0.282	3.23e-119	0	1.67376
AT3G19860	BHLH121	1.05e-123	0.117318	0.273	0.15	3.44e-119	0	1.82
AT3G55520	FKBP20-1	1.57e-123	0.0753605	0.285	0.174	5.17e-119	0	1.63793
AT1G71480	AT1G71480	2.92e-123	0.121844	0.345	0.203	9.59e-119	0	1.69951
AT5G53310	AT5G53310	3.47e-123	0.0551464	0.545	0.406	1.14e-118	0	1.34236
AT4G19390	AT4G19390	5.27e-123	0.110957	0.368	0.229	1.73e-118	0	1.60699
AT5G02840	RVE4	5.97e-123	0.144139	0.471	0.309	1.96e-118	0	1.52427
AT5G04740	ACR12	7.59e-123	0.0630875	0.398	0.271	2.49e-118	0	1.46863
AT1G58602	AT1G58602	9.09e-123	0.00170792	0.477	0.354	2.99e-118	0	1.34746
AT3G15770	AT3G15770	2.24e-122	0.0850266	0.375	0.246	7.36e-118	0	1.52439
AT4G25100	FSD1	2.55e-122	0.375232	0.661	0.447	8.37e-118	0	1.47875
AT4G05010	AT4G05010	3.31e-122	0.133557	0.585	0.409	1.09e-117	0	1.43032
AT1G53280	DJ1B	3.8e-122	0.123416	0.299	0.168	1.25e-117	0	1.77976
AT5G04550	AT5G04550	3.91e-122	0.101547	0.252	0.134	1.28e-117	0	1.8806
AT4G29070	AT4G29070	4.51e-122	0.126393	0.332	0.197	1.48e-117	0	1.68528
AT3G50500	SPK-2-2	5e-122	0.077351	0.434	0.306	1.64e-117	0	1.4183
AT4G31510	AT4G31510	8.65e-122	0.0117337	0.452	0.331	2.84e-117	0	1.36556
AT5G35530	RPS3C	2.23e-121	0.104626	0.599	0.422	7.32e-117	0	1.41943
AT5G64400	AT5G64400	2.39e-121	0.143506	0.988	0.889	7.84e-117	0	1.11136
AT4G37280	MRG1	2.77e-121	0.0773148	0.255	0.151	9.09e-117	0	1.68874
AT5G55940	EMB2731	3.93e-121	0.113237	0.36	0.227	1.29e-116	0	1.5859
AT3G10300	AT3G10300	5.6e-121	0.205336	0.714	0.522	1.84e-116	0	1.36782
AT1G59910	FH7	2.1e-120	0.0811394	0.313	0.19	6.89e-116	0	1.64737
AT3G57520	RFS2	4.09e-120	0.0832222	0.8	0.617	1.34e-115	0	1.2966
AT5G59950	AT5G59950	9.69e-120	0.0502069	0.416	0.296	3.18e-115	0	1.40541
AT5G06130	ORLIKE	1.97e-119	0.0759038	0.268	0.163	6.46e-115	0	1.64417
AT4G26110	NAP1;1	3.19e-119	0.0296045	0.502	0.372	1.05e-114	0	1.34946
AT1G50010	TUBA4.1	4.6e-119	0.142019	0.317	0.172	1.51e-114	0	1.84302
AT5G58490	AT5G58490	7.69e-119	0.136836	0.33	0.191	2.53e-114	0	1.72775
AT3G56190	ASNAP2	1.75e-118	0.0174616	0.515	0.394	5.75e-114	0	1.30711
AT5G46160	HLP	1.92e-118	0.114964	0.254	0.132	6.29e-114	0	1.92424
AT2G26430	CYCL1-1	7.83e-118	0.0605016	0.297	0.201	2.57e-113	0	1.47761
AT2G01090	AT2G01090	1.08e-117	0.103522	0.258	0.137	3.56e-113	0	1.88321
AT3G07568	AT3G07568	2.41e-117	0.044733	0.312	0.218	7.91e-113	0	1.43119
AT1G32640	MYC2	3.03e-117	0.0721582	0.427	0.291	9.94e-113	0	1.46735
AT3G18140	LST8-1	3.11e-117	0.0646878	0.267	0.172	1.02e-112	0	1.55233
AT5G62810	PEX14	6.3e-117	0.120611	0.324	0.194	2.07e-112	0	1.6701
AT1G76700	ATJ10	3.04e-116	0.0521571	0.392	0.276	9.97e-112	0	1.42029
AT5G67560	ARL8B	5.85e-116	0.0465178	0.258	0.166	1.92e-111	0	1.55422
AT5G27380	GSH2	9.36e-116	0.00503752	0.357	0.257	3.07e-111	0	1.38911
AT1G22450	COX6B-1	3.75e-115	0.0945987	0.41	0.276	1.23e-110	0	1.48551
AT1G51070	bHLH115	4.04e-115	0.0676743	0.397	0.274	1.33e-110	0	1.44891
AT5G08420	AT5G08420	4.65e-115	0.0443561	0.364	0.259	1.53e-110	0	1.40541
AT3G13882	AT3G13882	5.14e-115	0.106864	0.32	0.197	1.69e-110	0	1.62437
AT5G17560	BOLA4	7.28e-115	0.0476765	0.464	0.345	2.39e-110	0	1.34493
AT3G42050	VHA-H	3.5e-114	0.0403361	0.507	0.392	1.15e-109	0	1.29337
AT2G16930	AT2G16930	6.69e-114	0.10599	0.315	0.189	2.2e-109	0	1.66667
AT5G27470	AT5G27470	8.27e-114	0.06061	0.485	0.36	2.72e-109	0	1.34722
AT1G23260	UEV1A	1.44e-113	0.00582893	0.351	0.278	4.74e-109	0	1.26259
AT1G27695	TGD5	5.6e-113	0.0845735	0.293	0.182	1.84e-108	0	1.60989
AT2G24790	COL3	6.61e-113	0.0381726	0.508	0.382	2.17e-108	0	1.32984
AT2G33740	CUTA	1.64e-112	0.0721689	0.416	0.298	5.37e-108	0	1.39597
AT4G13170	RPL13AC	2.81e-112	0.0296195	0.422	0.307	9.22e-108	0	1.37459
AT4G39100	SHL	2.83e-112	0.0770287	0.364	0.244	9.29e-108	0	1.4918
AT3G15210	ERF4	1.1e-111	0.16994	0.942	0.802	3.6e-107	0	1.17456
AT1G78150	AT1G78150	1.67e-111	0.0866851	0.503	0.364	5.47e-107	0	1.38187
AT5G47220	ERF2	1.8e-111	0.0946441	0.458	0.299	5.92e-107	0	1.53177
AT1G06950	TIC110	2.27e-111	0.0186111	0.267	0.191	7.45e-107	0	1.39791
AT1G26750	AT1G26750	3.24e-111	0.0731582	0.254	0.154	1.07e-106	0	1.64935
AT1G25682	AT1G25682	4.18e-111	0.0616505	0.551	0.419	1.37e-106	0	1.31504
AT3G16190	AT3G16190	5.33e-111	0.0731565	0.35	0.246	1.75e-106	0	1.42276
AT3G05350	APP2	9.69e-111	0.105479	0.263	0.149	3.18e-106	0	1.7651
AT5G05250	AT5G05250	2.32e-110	0.160477	0.329	0.187	7.6e-106	0	1.75936
AT2G35040	AT2G35040	4.14e-110	0.0638086	0.312	0.21	1.36e-105	0	1.48571
AT1G53240	mMDH1	4.85e-110	0.0866238	0.35	0.233	1.59e-105	0	1.50215
AT2G19830	VPS32.1	9.76e-110	0.0652654	0.55	0.411	3.2e-105	0	1.3382
AT2G21970	SEP2.1	1.48e-109	0.111006	0.278	0.157	4.86e-105	0	1.7707
AT1G74560	NRP1	2.29e-109	0.053914	0.348	0.236	7.53e-105	0	1.47458
AT5G15650	RGP2	2.86e-109	0.192061	0.808	0.625	9.38e-105	0	1.2928
AT1G44770	AT1G44770	2.99e-109	0.0451287	0.451	0.339	9.81e-105	0	1.33038
AT3G49680	BCAT3	3.16e-109	0.0653016	0.336	0.233	1.04e-104	0	1.44206
AT5G66510	GAMMA CA3	4.1e-108	0.0485779	0.306	0.215	1.35e-103	0	1.42326
AT2G21130	CYP19-2	4.67e-108	0.203135	0.649	0.455	1.53e-103	0	1.42637
AT1G80780	AT1G80780	4.74e-108	0.016466	0.389	0.297	1.56e-103	0	1.30976
AT1G08640	CJD1	7.79e-108	0.0839615	0.269	0.163	2.56e-103	0	1.65031
AT1G49600	ATRBP47A	8.92e-108	0.0849436	0.386	0.266	2.93e-103	0	1.45113
AT5G60680	AT5G60680	1.08e-107	0.0553948	0.616	0.447	3.56e-103	0	1.37808
AT5G49450	BZIP1	1.43e-107	0.125603	0.761	0.577	4.68e-103	0	1.31889
AT5G50870	UBC27	1.19e-106	0.000835479	0.378	0.295	3.9e-102	0	1.28136
AT2G06025	AT2G06025	1.36e-106	0.0783937	0.421	0.294	4.45e-102	0	1.43197
AT5G08040	TOM5	2.99e-106	0.00480623	0.407	0.323	9.81e-102	0	1.26006
AT3G49430	SR34A	4.77e-106	0.086657	0.321	0.206	1.57e-101	0	1.55825
AT4G02510	TOC159	4.57e-105	0.0768025	0.377	0.258	1.5e-100	0	1.46124
AT1G62040	ATG8C	4.68e-105	0.00123037	0.355	0.285	1.54e-100	0	1.24561
AT4G09150	AT4G09150	4.96e-105	0.189426	0.451	0.281	1.63e-100	0	1.60498
AT5G62540	UBC3	1.02e-103	0.118352	0.575	0.415	3.35e-99	0	1.38554
AT5G21940	AT5G21940	6.04e-103	0.240756	0.945	0.82	1.98e-98	0	1.15244
AT1G15370	AT1G15370	6.11e-103	0.0439227	0.388	0.289	2.01e-98	0	1.34256
AT5G05010	AT5G05010	7.42e-103	0.0649573	0.333	0.23	2.44e-98	0	1.44783
AT1G55310	SR33	3.35e-102	0.0214342	0.282	0.201	1.1e-97	0	1.40299
AT1G56060	AT1G56060	7.11e-102	0.600374	0.351	0.189	2.33e-97	0	1.85714
AT4G15780	ATVAMP724	7.36e-102	0.0818274	0.382	0.259	2.42e-97	0	1.4749
AT1G05100	MAPKKK18	1.33e-101	0.272122	0.661	0.469	4.35e-97	0	1.40938
AT1G10960	FD1	9.37e-101	0.0913863	0.525	0.366	3.08e-96	0	1.43443
AT5G05410	DREB2A	1.39e-100	0.257527	0.517	0.328	4.56e-96	0	1.57622
AT1G55530	AT1G55530	1.63e-100	0.0832332	0.43	0.306	5.35e-96	0	1.40523
AT5G04590	SIR	1.96e-100	0.0662894	0.367	0.253	6.45e-96	0	1.45059
AT4G02840	AT4G02840	8.27e-100	0.00530048	0.445	0.356	2.72e-95	0	1.25
AT5G58200	AT5G58200	2.07e-99	0.0531633	0.294	0.202	6.81e-95	0	1.45545
AT3G29000	CML45	2.88e-99	0.197397	0.367	0.209	9.44e-95	0	1.75598
AT4G12060	CLPT2	3.09e-99	0.0584383	0.288	0.199	1.01e-94	0	1.44724
AT4G20780	CML42	4.04e-99	0.222393	0.494	0.313	1.32e-94	0	1.57827
AT4G34490	ATCAP1	5.21e-99	0.0843675	0.251	0.151	1.71e-94	0	1.66225
AT2G05630	ATG8D	7.01e-99	0.0290048	0.333	0.252	2.3e-94	0	1.32143
AT5G40810	CYC12	7.51e-99	0.0576419	0.483	0.371	2.47e-94	0	1.30189
AT1G32580	MORF5	9.82e-99	0.0396622	0.348	0.248	3.23e-94	0	1.40323
AT4G09570	CPK4	1.51e-98	0.118163	0.252	0.135	4.94e-94	0	1.86667
AT4G14300	RNP1	2.7e-98	0.0813868	0.292	0.193	8.88e-94	0	1.51295
AT4G29735	AT4G29735	2.87e-98	0.00275207	0.413	0.329	9.44e-94	0	1.25532
AT5G42530	AT5G42530	7.79e-98	0.782841	0.27	0.142	2.56e-93	0	1.90141
AT1G02660	PLIP2	1.2e-97	0.0763862	0.277	0.168	3.94e-93	0	1.64881
AT1G17420	LOX3	2.39e-97	0.101487	0.595	0.426	7.86e-93	0	1.39671
AT2G21240	BPC4	2.68e-97	0.0728587	0.314	0.217	8.81e-93	0	1.447
AT3G48680	GAMMACAL2	3.4e-97	0.0552002	0.314	0.218	1.12e-92	0	1.44037
AT1G17470	DRG1	6.12e-97	0.0668422	0.426	0.311	2.01e-92	0	1.36977
AT5G59570	BOA	8.68e-97	0.129292	0.26	0.135	2.85e-92	0	1.92593
AT5G54165	AT5G54165	9.77e-97	0.371902	0.764	0.603	3.21e-92	0	1.267
AT3G06483	PDK	1.85e-96	0.0756985	0.299	0.2	6.08e-92	0	1.495
AT5G63860	UVR8	2.04e-96	0.0764301	0.314	0.218	6.71e-92	0	1.44037
AT5G43850	ARD4	2.74e-96	0.0635692	0.26	0.166	8.98e-92	0	1.56627
AT4G20890	TUBB9	2.89e-96	0.0665125	0.31	0.216	9.5e-92	0	1.43519
AT3G52360	AT3G52360	3.87e-96	0.198841	0.693	0.524	1.27e-91	0	1.32252
AT5G47320	RPS19	8.31e-96	0.0124009	0.312	0.241	2.73e-91	0	1.29461
AT4G15130	ATCCT2	8.77e-96	0.0745167	0.347	0.235	2.88e-91	0	1.4766
AT3G46600	SCL30	1.11e-95	0.0525693	0.481	0.357	3.65e-91	0	1.34734
AT2G35795	TIM14-1	1.57e-95	0.0406571	0.313	0.227	5.14e-91	0	1.37885
AT5G20130	AT5G20130	3.22e-95	0.0816442	0.305	0.2	1.06e-90	0	1.525
AT3G45770	AT3G45770	3.88e-95	0.0896197	0.3	0.198	1.27e-90	0	1.51515
AT3G15060	RABA1G	4.58e-95	0.00567912	0.385	0.306	1.5e-90	0	1.25817
AT4G25890	RPP3A	9.1e-95	0.0148416	0.328	0.244	2.99e-90	0	1.34426
AT5G59730	ATEXO70H7	1.13e-94	0.171676	0.436	0.277	3.72e-90	0	1.57401
AT1G80560	IMDH2	1.68e-94	0.0357639	0.297	0.215	5.51e-90	0	1.3814
AT5G03520	RABE1D	1.7e-94	0.0904143	0.444	0.324	5.57e-90	0	1.37037
AT3G52990	AT3G52990	2.14e-94	0.042897	0.298	0.214	7.03e-90	0	1.39252
AT1G17730	CHMP1A	3.79e-94	0.0156652	0.272	0.204	1.25e-89	0	1.33333
AT5G57815	COX6B-2	3.88e-94	0.0232652	0.326	0.244	1.27e-89	0	1.33607
AT1G79340	AMC4	1.08e-93	0.00161481	0.424	0.342	3.55e-89	0	1.23977
AT1G57680	AT1G57680	1.12e-93	0.0495801	0.327	0.235	3.66e-89	0	1.39149
AT2G33700	PP2C27	1.29e-93	0.0684703	0.492	0.38	4.24e-89	0	1.29474
AT2G03470	AT2G03470	1.36e-93	0.0419223	0.308	0.227	4.48e-89	0	1.35683
AT2G27960	CKS1	2.06e-93	0.0657022	0.26	0.167	6.78e-89	0	1.55689
AT3G10985	SAG20	1.01e-92	0.166548	0.532	0.363	3.32e-88	0	1.46556
AT1G08490	NFS2	1.69e-92	0.0454476	0.302	0.221	5.54e-88	0	1.36652
AT4G16146	AT4G16146	4.29e-92	0.0289522	0.286	0.195	1.41e-87	0	1.46667
AT1G01720	NAC002	1.11e-91	0.233094	0.812	0.669	3.65e-87	0	1.21375
AT4G25500	RS40	1.22e-91	0.0822936	0.3	0.2	4.01e-87	0	1.5
AT3G47836	AT3G47836	2.11e-91	0.0699867	0.324	0.227	6.93e-87	0	1.42731
AT5G11740	AGP15	6.89e-91	0.00264303	0.987	0.922	2.26e-86	0	1.0705
AT5G13710	SMT1	9.67e-91	0.141059	0.504	0.349	3.18e-86	0	1.44413
AT2G02800	PBL3	1.06e-90	0.0674766	0.331	0.229	3.49e-86	0	1.44541
AT3G59600	NRPB8B	1.56e-90	0.00376737	0.403	0.332	5.12e-86	0	1.21386
AT2G20360	AT2G20360	2.51e-90	0.0709768	0.347	0.251	8.23e-86	0	1.38247
AT2G38000	AT2G38000	5.75e-90	0.00380039	0.43	0.344	1.89e-85	0	1.25
AT2G43710	FAB2	6.5e-90	0.100688	0.404	0.281	2.13e-85	0	1.43772
AT5G49510	PFD3	7.33e-90	0.0090461	0.321	0.255	2.41e-85	0	1.25882
AT4G01100	ADNT1	7.38e-90	0.0296179	0.344	0.264	2.42e-85	0	1.30303
AT5G47230	ERF5	1.39e-89	0.0549956	0.459	0.322	4.57e-85	0	1.42547
AT3G28710	VHA-D1	2.34e-89	0.0746032	0.423	0.317	7.67e-85	0	1.33438
AT3G48070	AT3G48070	3.72e-89	0.0156586	0.466	0.37	1.22e-84	0	1.25946
AT1G79750	NADP-ME4	6.27e-89	0.0641384	0.435	0.328	2.06e-84	0	1.32622
AT5G65480	AT5G65480	8.24e-89	0.0540813	0.312	0.213	2.71e-84	0	1.46479
AT5G06210	S-RBP11	1.37e-88	0.0917479	0.288	0.182	4.51e-84	0	1.58242
AT1G49760	PAB8	2.03e-88	0.0247799	0.299	0.221	6.66e-84	0	1.35294
AT5G52370	AT5G52370	4.39e-88	0.0768502	0.256	0.166	1.44e-83	0	1.54217
AT2G44160	MTHFR2	4.45e-88	0.0902626	0.259	0.154	1.46e-83	0	1.68182
AT3G11730	RABD1	6.04e-88	0.017781	0.267	0.204	1.98e-83	0	1.30882
AT2G37200	AT2G37200	1e-87	0.0294653	0.251	0.18	3.29e-83	0	1.39444
AT3G60190	DRP1E	3.5e-87	0.011682	0.274	0.213	1.15e-82	0	1.28638
AT5G19350	RBP47B'	6.3e-87	0.0309401	0.305	0.235	2.07e-82	0	1.29787
AT5G45630	AT5G45630	1.21e-86	0.0964799	0.259	0.142	3.98e-82	0	1.82394
AT3G27820	MDAR4	1.36e-86	0.0773956	0.277	0.181	4.46e-82	0	1.53039
AT1G29880	AT1G29880	2.19e-86	0.0939395	0.255	0.157	7.18e-82	0	1.6242
AT3G61150	HDG1	8.4e-86	0.122748	0.302	0.17	2.76e-81	0	1.77647
AT3G06050	PRXIIF	9.06e-86	0.0155117	0.362	0.289	2.97e-81	0	1.2526
AT4G02340	AT4G02340	1.07e-85	0.0114426	0.293	0.233	3.52e-81	0	1.25751
AT3G03890	AT3G03890	2.5e-85	0.0562011	0.292	0.212	8.21e-81	0	1.37736
AT1G06700	PTI11	3.27e-85	0.0622712	0.399	0.3	1.07e-80	0	1.33
AT2G25870	YBEY	4.28e-85	0.0481438	0.347	0.263	1.4e-80	0	1.31939
AT1G15430	AT1G15430	2.61e-84	0.278249	0.624	0.449	8.57e-80	0	1.38976
AT1G19400	AT1G19400	8.97e-84	0.0219681	0.496	0.392	2.95e-79	0	1.26531
AT2G34750	AT2G34750	1.59e-83	0.0450913	0.283	0.204	5.22e-79	0	1.38725
AT1G19600	AT1G19600	1.87e-83	0.0468771	0.332	0.248	6.14e-79	0	1.33871
AT2G15960	AT2G15960	3e-83	0.160696	0.967	0.87	9.86e-79	0	1.11149
AT1G50200	ALATS	1.37e-82	0.0262219	0.402	0.324	4.51e-78	0	1.24074
AT5G09830	BOLA2	2.45e-82	0.00777483	0.29	0.228	8.05e-78	0	1.27193
AT2G42500	PP2A3	3.08e-82	0.0684035	0.355	0.259	1.01e-77	0	1.37066
AT5G58740	AT5G58740	2.18e-81	0.0776169	0.258	0.167	7.16e-77	0	1.54491
AT1G10890	AT1G10890	3.59e-81	0.0306793	0.291	0.219	1.18e-76	0	1.32877
AT3G17100	BHLH147	4.1e-81	0.00860111	0.251	0.193	1.35e-76	0	1.30052
AT5G05360	AT5G05360	4.25e-81	0.0210345	0.367	0.292	1.4e-76	0	1.25685
AT2G26190	IQM4	5.21e-81	0.119817	0.258	0.141	1.71e-76	0	1.82979
AT1G53320	TULP7	2.07e-80	0.0154574	0.379	0.309	6.78e-76	0	1.22654
AT2G20630	PPC3-1.2	2.29e-80	0.0573344	0.747	0.601	7.53e-76	0	1.24293
AT2G23350	PAB4	4.24e-80	0.0394073	0.285	0.213	1.39e-75	0	1.33803
AT3G01120	CGS1	5.08e-80	0.0487639	0.322	0.238	1.67e-75	0	1.35294
AT5G11680	AT5G11680	7.35e-80	0.0781771	0.46	0.346	2.41e-75	0	1.32948
AT5G11840	AT5G11840	1.06e-79	0.000905615	0.286	0.235	3.49e-75	0	1.21702
AT5G05060	AT5G05060	1.11e-79	0.0525344	0.325	0.244	3.65e-75	0	1.33197
AT1G02130	RABD2A	1.82e-79	0.0137981	0.305	0.247	5.96e-75	0	1.23482
AT1G07890	APX1	1.88e-79	0.0562315	0.963	0.864	6.17e-75	0	1.11458
AT1G18740	AT1G18740	4.07e-79	0.188462	0.641	0.47	1.34e-74	0	1.36383
AT3G17090	AT3G17090	4.88e-79	0.0359534	0.333	0.259	1.6e-74	0	1.28571
AT4G17486	AT4G17486	5.44e-79	0.0600332	0.345	0.254	1.79e-74	0	1.35827
AT1G49032	AT1G49032	5.6e-79	0.0390429	0.305	0.221	1.84e-74	0	1.38009
AT3G01790	AT3G01790	8.24e-79	0.0314597	0.275	0.209	2.71e-74	0	1.31579
AT5G45360	SKIP31	1.31e-78	0.00035514	0.396	0.329	4.31e-74	0	1.20365
AT2G43630	AT2G43630	1.58e-78	0.0240723	0.333	0.263	5.18e-74	0	1.26616
AT4G33350	TIC22	7.53e-78	0.0618837	0.276	0.193	2.47e-73	0	1.43005
AT3G14050	RSH2	8.01e-78	0.0446134	0.477	0.379	2.63e-73	0	1.25858
AT5G56940	RPS16-2	1.2e-77	0.0178273	0.305	0.242	3.95e-73	0	1.26033
AT5G27860	AT5G27860	1.04e-76	0.0206378	0.322	0.256	3.41e-72	0	1.25781
AT5G26800	AT5G26800	2.04e-76	0.0361355	0.294	0.225	6.69e-72	0	1.30667
AT2G20530	PHB6	2.57e-76	0.0317742	0.32	0.253	8.42e-72	0	1.26482
AT4G11175	AT4G11175	2.62e-76	0.0502865	0.259	0.184	8.59e-72	0	1.40761
AT2G42910	PRS4	2.91e-76	0.0748152	0.256	0.173	9.57e-72	0	1.47977
AT5G17840	AT5G17840	7.11e-76	0.0274591	0.364	0.284	2.34e-71	0	1.28169
AT3G53500	RS2Z32	1.68e-75	0.0749843	0.371	0.27	5.51e-71	0	1.37407
AT1G54050	HSP17.4B	2.56e-75	0.586532	0.336	0.2	8.4e-71	0	1.68
AT3G23280	XBAT35	3e-75	0.0143052	0.259	0.2	9.85e-71	0	1.295
AT4G25550	CFIS2	3.72e-75	0.00212927	0.351	0.293	1.22e-70	0	1.19795
AT1G68670	HHO2	1.5e-74	0.00115588	0.376	0.299	4.93e-70	0	1.25753
AT1G11890	SEC22	1.77e-74	0.0353128	0.274	0.207	5.81e-70	0	1.32367
AT4G29950	AT4G29950	2.32e-74	0.0406485	0.511	0.415	7.62e-70	0	1.23133
AT3G63420	AGG1	1.05e-73	0.064693	0.251	0.174	3.45e-69	0	1.44253
AT2G25510	AT2G25510	4.45e-73	0.424441	0.281	0.148	1.46e-68	0	1.89865
AT4G14716	ARD2	7.82e-73	0.041682	0.302	0.232	2.57e-68	0	1.30172
AT5G65620	AT5G65620	7.91e-73	0.00505786	0.284	0.234	2.6e-68	0	1.21368
AT4G39910	UBP3	2.49e-72	0.0285683	0.285	0.228	8.16e-68	0	1.25
AT4G36500	AT4G36500	6.77e-72	0.103721	0.892	0.768	2.22e-67	0	1.16146
AT5G35735	AT5G35735	9.56e-72	0.0682559	0.923	0.828	3.14e-67	0	1.11473
AT1G25400	AT1G25400	1.02e-71	0.0629277	0.819	0.683	3.34e-67	0	1.19912
AT3G61580	SLD1	1.79e-71	0.0423937	0.345	0.262	5.87e-67	0	1.31679
AT1G34260	FAB1D	2.63e-71	0.00828037	0.322	0.256	8.63e-67	0	1.25781
AT4G14910	HISN5B	2.8e-71	0.0214265	0.311	0.251	9.2e-67	0	1.23904
AT3G10020	AT3G10020	3.25e-71	0.225055	0.73	0.57	1.07e-66	0	1.2807
AT1G14685	BPC2	4.09e-71	0.0852723	0.266	0.18	1.34e-66	0	1.47778
AT3G46640	PCL1	4.19e-71	0.042847	0.428	0.329	1.38e-66	0	1.30091
AT2G27600	SKD1	5.57e-71	0.0118108	0.327	0.27	1.83e-66	0	1.21111
AT3G27740	CARA	1e-70	0.0285924	0.315	0.249	3.29e-66	0	1.26506
AT4G24740	AFC2	1.92e-70	0.0275629	0.3	0.237	6.31e-66	0	1.26582
AT4G39800	IPS1.1	6.33e-70	0.0343067	0.259	0.181	2.08e-65	0	1.43094
AT1G76680	OPR1	1.33e-69	0.288148	0.984	0.948	4.36e-65	0	1.03797
AT1G69890	AT1G69890	2.21e-69	0.033607	0.587	0.459	7.26e-65	0	1.27887
AT1G68580	AT1G68580	1.68e-68	0.0666467	0.276	0.194	5.52e-64	0	1.42268
AT3G09740	SYP71	2.49e-68	0.0908643	0.357	0.263	8.19e-64	0	1.35741
AT2G34690	ACD11	2.83e-68	0.0222704	0.314	0.263	9.29e-64	0	1.19392
AT3G54810	GATA8	4.26e-68	0.0148881	0.278	0.206	1.4e-63	0	1.34951
AT4G28880	CKL3	1.42e-67	0.00751263	0.346	0.292	4.67e-63	0	1.18493
AT3G13310	AT3G13310	2.17e-66	0.0688774	0.929	0.822	7.14e-62	0	1.13017
AT1G15390	PDF1A	2.3e-66	0.0536641	0.277	0.201	7.57e-62	0	1.37811
AT1G22810	ERF019	5e-66	0.360269	0.459	0.307	1.64e-61	0	1.49511
AT2G32210	AT2G32210	9.92e-66	0.254722	0.751	0.607	3.26e-61	0	1.23723
AT4G34270	TIP41L	1.35e-65	0.0273626	0.27	0.217	4.45e-61	0	1.24424
AT1G53540	HSP17.6C	1.51e-65	0.774884	0.381	0.336	4.97e-61	0	1.13393
AT4G02880	AT4G02880	3.72e-65	0.126374	0.35	0.246	1.22e-60	0	1.42276
AT3G30775	POX1	2.45e-64	0.0980232	0.675	0.531	8.05e-60	0	1.27119
AT5G48570	FKBP65	2.57e-64	0.514549	0.406	0.294	8.42e-60	0	1.38095
AT5G03740	HDT3	5.62e-63	0.0112898	0.319	0.261	1.85e-58	0	1.22222
AT3G18950	AT3G18950	1.28e-60	0.161031	0.341	0.217	4.21e-56	0	1.57143
AT5G03030	AT5G03030	3.46e-60	0.0910816	0.862	0.74	1.14e-55	0	1.16486
AT1G30260	AT1G30260	2.97e-59	0.0846407	0.272	0.178	9.74e-55	0	1.52809
AT5G51880	AT5G51880	3.96e-59	0.0150071	0.252	0.213	1.3e-54	0	1.1831
AT5G57580	CBP60B	6.55e-59	0.02299	0.262	0.214	2.15e-54	0	1.2243
AT5G26210	AL4	9.08e-58	0.0420235	0.29	0.226	2.98e-53	0	1.28319
AT1G76970	TOL4	8.04e-57	0.0214354	0.332	0.271	2.64e-52	0	1.22509
AT3G29360	UGD2	8.29e-57	0.0510165	0.301	0.23	2.72e-52	0	1.3087
AT5G41790	CIP1	8.52e-56	0.0139115	0.27	0.218	2.8e-51	0	1.23853
AT3G50000	CKA2	1.09e-54	0.0488023	0.342	0.274	3.56e-50	0	1.24818
AT5G66240	AT5G66240	1.38e-54	0.0454792	0.257	0.201	4.52e-50	0	1.27861
AT1G58290	HEMA1	3.86e-53	0.0453985	0.27	0.204	1.27e-48	0	1.32353
AT4G36020	CSP1	5.4e-53	0.0425991	0.346	0.269	1.77e-48	0	1.28625
AT2G39660	BIK1	4.05e-52	0.150298	0.753	0.621	1.33e-47	0	1.21256
AT5G62520	SRO5	3.21e-51	0.0337339	0.473	0.369	1.05e-46	0	1.28184
AT5G67190	ERF010	1.4e-47	0.0400422	0.508	0.41	4.59e-43	0	1.23902
AT5G45100	BRG1	1.55e-47	0.155898	0.39	0.275	5.1e-43	0	1.41818
AT5G67480	BT4	2.38e-46	0.0544472	0.324	0.243	7.83e-42	0	1.33333
AT4G05320	UBQ10	6.01e-46	0.166059	0.999	0.994	1.97e-41	0	1.00503
AT1G10150	PP2A10	3.14e-45	0.0323313	0.276	0.226	1.03e-40	0	1.22124
AT5G62020	HSFB2A	3.13e-44	0.018879	0.259	0.205	1.03e-39	0	1.26341
AT5G48150	PAT1.2	3.92e-44	0.175951	0.528	0.422	1.29e-39	0	1.25118
AT4G33467	AT4G33467	6.53e-44	0.227433	0.411	0.296	2.14e-39	0	1.38851
AT1G14200	AT1G14200	2.47e-42	0.314812	0.274	0.172	8.1e-38	0	1.59302
AT4G38932	AT4G38932	5.76e-42	0.0247123	0.463	0.383	1.89e-37	0	1.20888
AT1G22985	ERF069	9.9e-40	0.189214	0.331	0.246	3.25e-35	0	1.34553
AT5G12030	HSP17.7	6.17e-39	0.314943	0.664	0.645	2.03e-34	0	1.02946
AT3G01650	RGLG1	1.63e-38	0.112491	0.307	0.225	5.34e-34	0	1.36444
AT1G76070	AT1G76070	5.69e-38	0.0465882	0.769	0.722	1.87e-33	0	1.0651
AT4G38810	AT4G38810	1.67e-37	0.0107752	0.353	0.302	5.47e-33	0	1.16887
AT3G45730	AT3G45730	2.58e-37	0.143908	0.307	0.208	8.46e-33	0	1.47596
AT1G65390	PP2A5	5.68e-35	0.0995289	0.308	0.22	1.86e-30	0	1.4
AT4G19700	BOI	1.43e-32	0.17933	0.565	0.456	4.68e-28	0	1.23904
AT2G27310	AT2G27310	1.4e-31	0.115158	0.507	0.412	4.61e-27	0	1.23058
AT1G75750	GASA1	7.48e-31	0.246604	0.405	0.303	2.46e-26	0	1.33663
AT1G20100	AT1G20100	4.79e-30	0.0613005	0.52	0.434	1.57e-25	0	1.19816
AT1G05340	AT1G05340	3.48e-29	0.190691	0.803	0.757	1.14e-24	0	1.06077
AT3G25760	AOC1	2.57e-27	0.0884863	0.821	0.737	8.45e-23	0	1.11398
AT2G40340	DREB2C	2.31e-26	0.0952835	0.307	0.232	7.58e-22	0	1.32328
AT2G31945	AT2G31945	1.59e-24	0.123243	0.643	0.548	5.22e-20	0	1.17336
AT3G12510	AT3G12510	4.3e-24	0.0278555	0.262	0.207	1.41e-19	0	1.2657
AT3G24500	MBF1C	2.32e-22	0.272898	0.561	0.525	7.62e-18	0	1.06857
AT3G46230	HSP17.4A	9.39e-22	0.120189	0.505	0.498	3.08e-17	0	1.01406
AT1G71030	ATMYBL2	1.19e-21	0.150171	0.497	0.407	3.89e-17	0	1.22113
AT3G07090	AT3G07090	1.79e-21	0.164839	0.457	0.368	5.88e-17	0	1.24185
AT1G74310	CLPB1	2.89e-20	0.302512	0.385	0.318	9.5e-16	0	1.21069
AT4G36950	MAPKKK21	4.25e-20	0.191715	0.408	0.327	1.4e-15	0	1.24771
AT5G01750	AT5G01750	6.21e-18	0.167127	0.652	0.575	2.04e-13	0	1.13391
AT3G04620	AT3G04620	7.65e-15	0.0523003	0.503	0.438	2.51e-10	0	1.1484
AT5G54490	PBP1	1.03e-14	0.0717325	0.301	0.245	3.38e-10	0	1.22857
AT2G06050	OPR3	8.39e-14	0.0967499	0.408	0.363	2.75e-09	0	1.12397
AT5G12020	HSP17.6	6.55e-13	0.281712	0.367	0.334	2.15e-08	0	1.0988
AT2G32190	AT2G32190	3.68e-12	0.0955169	0.78	0.752	1.21e-07	0	1.03723
AT5G16010	AT5G16010	9.23e-12	0.0948269	0.978	0.964	3.03e-07	0	1.01452
AT2G29450	GSTU5	2.03e-08	0.0139679	0.987	0.983	0.000666324	0	1.00407
AT5G13200	AT5G13200	1.56e-07	0.0394312	0.271	0.244	0.00513012	0	1.11066
AT3G15518	AT3G15518	8.16e-07	0.0426809	0.291	0.285	0.0267838	0	1.02105
AT2G46370	JAR1	4.08e-06	0.0690821	0.308	0.3	0.13391	0	1.02667
AT4G12400	HOP3	0.00010505	0.0736578	0.418	0.432	1	0	0.967593
AT3G41768	AT3G41768	0	0.985719	0.94	0.977	0	1	0.962129
AT3G06355	AT3G06355	0	0.745179	0.598	0.779	0	1	0.767651
ATCG00020	PSBA	0	0.521428	0.999	1	0	1	0.999
AT3G05727	AT3G05727	0	0.448875	0.754	0.761	0	1	0.990802
AT2G07671	AT2G07671	0	0.407605	0.436	0.654	0	1	0.666667
ATCG00140	ATPH	0	0.347234	0.353	0.584	0	1	0.604452
ATCG00280	PSBC	0	0.308642	0.596	0.841	0	1	0.70868
ATCG00580	PSBE	0	0.302763	0.532	0.793	0	1	0.67087
ATMG01360	COX1	0	0.290974	0.313	0.576	0	1	0.543403
ATCG00540	PETA	0	0.288104	0.626	0.859	0	1	0.728754
AT1G07590	AT1G07590	0	0.272379	0.999	1	0	1	0.999
ATCG00730	PETD	0	0.263021	0.344	0.578	0	1	0.595156
ATCG00120	ATPA	0	0.246485	0.483	0.771	0	1	0.626459
ATCG00530	CEMA	0	0.244802	0.366	0.639	0	1	0.57277
ATCG00300	PSBZ	0	0.239247	0.245	0.482	0	1	0.508299
ATCG00040	MATK	0	0.23594	0.573	0.821	0	1	0.697929
ATCG00070	PSBK	0	0.231633	0.292	0.549	0	1	0.531876
AT5G53560	CYTB5-E	0	0.22367	0.568	0.798	0	1	0.711779
ATCG00520	YCF4	0	0.215668	0.301	0.566	0	1	0.531802
AT4G30600	AT4G30600	0	0.207275	0.298	0.552	0	1	0.539855
ATCG00270	PSBD	0	0.204742	0.225	0.451	0	1	0.498891
AT1G02500	SAM1	0	0.201355	0.42	0.688	0	1	0.610465
AT4G34110	PAB2.1	0	0.199027	0.362	0.653	0	1	0.554364
AT1G66240	ATX1	0	0.196418	0.368	0.619	0	1	0.594507
ATCG01100	NDHA	0	0.195692	0.261	0.503	0	1	0.518887
ATCG01010	NDHF	0	0.194516	0.395	0.684	0	1	0.577485
AT4G33865	RPS29C.2	0	0.194064	0.465	0.731	0	1	0.636115
ATCG00430	NDHK	0	0.192161	0.335	0.622	0	1	0.538585
ATCG01130	YCF1.2	0	0.192094	0.43	0.737	0	1	0.583446
ATCG00740	RPOA	0	0.191801	0.566	0.825	0	1	0.686061
AT5G64130	AT5G64130	0	0.191097	0.506	0.79	0	1	0.640506
AT3G18740	RPL30C	0	0.188031	0.457	0.72	0	1	0.634722
AT5G56710	RPL31C	0	0.187991	0.492	0.723	0	1	0.680498
AT3G06700	RPL29A	0	0.186249	0.476	0.73	0	1	0.652055
ATCG00480	ATPB	0	0.184466	0.543	0.808	0	1	0.67203
AT1G52300	RPL37B	0	0.17946	0.556	0.793	0	1	0.701135
AT4G21105	AT4G21105	0	0.178355	0.407	0.703	0	1	0.578947
AT4G31985	RPL39A	0	0.176743	0.382	0.656	0	1	0.582317
AT1G04480	RPL23A	0	0.175856	0.584	0.8	0	1	0.73
AT4G34881	AT4G34881	0	0.17526	0.328	0.605	0	1	0.542149
AT2G19750	RPS30A.1	0	0.174281	0.337	0.589	0	1	0.572156
AT5G64140	RPS28C	0	0.171461	0.31	0.556	0	1	0.557554
AT1G77940	RPL30B	0	0.171281	0.44	0.697	0	1	0.631277
ATCG00810	RPL22	0	0.17106	0.359	0.674	0	1	0.532641
AT2G07698	AT2G07698	0	0.169694	0.216	0.475	0	1	0.454737
AT2G46505	SDH4	0	0.169082	0.211	0.426	0	1	0.495305
AT5G47930	RPS27D	0	0.168621	0.529	0.785	0	1	0.673885
AT5G67490	AT5G67490	0	0.168025	0.226	0.445	0	1	0.507865
AT3G23390	RPL36AB	0	0.165948	0.378	0.638	0	1	0.592476
AT3G22230	RPL27B	0	0.165404	0.474	0.715	0	1	0.662937
ATCG00790	RPL16.1	0	0.165095	0.517	0.811	0	1	0.637485
AT3G56340	RPS26C	0	0.160996	0.536	0.775	0	1	0.691613
AT1G30880	AT1G30880	0	0.160436	0.183	0.386	0	1	0.474093
AT5G56670	RPS30A	0	0.160049	0.373	0.646	0	1	0.577399
AT1G10590	AT1G10590	0	0.159475	0.421	0.724	0	1	0.581492
AT4G00860	ATOZI1	0	0.159125	0.323	0.601	0	1	0.537438
AT1G21065	AT1G21065	0	0.156957	0.321	0.58	0	1	0.553448
ATCG01080	NDHG	0	0.156838	0.278	0.565	0	1	0.492035
ATCG00180	RPOC1	0	0.15669	0.276	0.568	0	1	0.485915
AT4G14342	AT4G14342	0	0.156068	0.229	0.498	0	1	0.459839
AT5G40370	AT5G40370	0	0.155869	0.538	0.785	0	1	0.68535
ATCG00780	RPL14	0	0.15511	0.396	0.717	0	1	0.552301
ATCG00800	RPS3	0	0.154404	0.375	0.71	0	1	0.528169
AT5G59613	AT5G59613	0	0.15376	0.379	0.669	0	1	0.566517
ATCG01020	RPL32	0	0.153298	0.44	0.744	0	1	0.591398
AT3G16080	RPL37C	0	0.153143	0.39	0.646	0	1	0.603715
AT4G27500	PPI1	0	0.152927	0.406	0.687	0	1	0.590975
AT4G13615	AT4G13615	0	0.151961	0.248	0.52	0	1	0.476923
AT1G51650	AT1G51650	0	0.151829	0.362	0.655	0	1	0.552672
AT5G55850	NOI	0	0.150603	0.395	0.68	0	1	0.580882
AT1G07940	A1.2	0	0.149289	0.169	0.37	0	1	0.456757
AT3G08740	AT3G08740	0	0.148986	0.255	0.492	0	1	0.518293
ATCG00170	RPOC2	0	0.148882	0.381	0.702	0	1	0.542735
AT2G41110	CAM2	0	0.148687	0.382	0.656	0	1	0.582317
AT1G26880	RPL34A	0	0.147381	0.342	0.593	0	1	0.576728
AT3G59540	RPL38A	0	0.147104	0.44	0.723	0	1	0.608575
AT4G21980	APG8A	0	0.147058	0.304	0.544	0	1	0.558824
AT3G13920	EIF4A1	0	0.147001	0.384	0.695	0	1	0.552518
AT2G25210	AT2G25210	0	0.146127	0.244	0.486	0	1	0.502058
AT1G15270	AT1G15270	0	0.145875	0.366	0.639	0	1	0.57277
AT5G42300	UBL5	0	0.1455	0.585	0.836	0	1	0.699761
AT3G05560	RPL22B	0	0.144617	0.427	0.692	0	1	0.617052
AT5G66052	AT5G66052	0	0.14408	0.345	0.614	0	1	0.561889
AT5G15320	AT5G15320	0	0.143644	0.25	0.512	0	1	0.488281
AT2G43460	RPL38A.1	0	0.142456	0.479	0.756	0	1	0.633598
AT3G03070	AT3G03070	0	0.141248	0.329	0.644	0	1	0.51087
AT1G15400	AT1G15400	0	0.14016	0.247	0.491	0	1	0.503055
ATCG00160	RPS2.2	0	0.140068	0.186	0.423	0	1	0.439716
AT3G15580	ATG8I	0	0.139437	0.322	0.624	0	1	0.516026
ATCG00670	CLPP1	0	0.139434	0.243	0.531	0	1	0.457627
AT2G01450	MPK17	0	0.139314	0.175	0.405	0	1	0.432099
AT5G39950	TRX2	0	0.139165	0.267	0.553	0	1	0.482821
AT1G27350	AT1G27350	0	0.139008	0.272	0.541	0	1	0.502773
AT3G60750	TKL-1	0	0.138908	0.26	0.519	0	1	0.500963
AT4G29060	emb2726	0	0.138475	0.16	0.365	0	1	0.438356
AT2G36620	RPL24A	0	0.138366	0.301	0.562	0	1	0.535587
ATCG01070	NDHE	0	0.137421	0.468	0.776	0	1	0.603093
AT3G01130	AT3G01130	0	0.13692	0.175	0.392	0	1	0.446429
AT2G33470	GLTP1	0	0.135049	0.139	0.322	0	1	0.431677
AT1G68660	CPLS1	0	0.134561	0.195	0.431	0	1	0.452436
AT5G04140	GLU1	0	0.134406	0.252	0.512	0	1	0.492188
AT3G08610	AT3G08610	0	0.133025	0.39	0.709	0	1	0.550071
ATCG01040	CCSA	0	0.132929	0.584	0.835	0	1	0.699401
AT2G05220	RPS17B	0	0.132906	0.491	0.758	0	1	0.647757
AT2G05620	PGR5	0	0.131925	0.346	0.629	0	1	0.550079
AT1G72020	AT1G72020	0	0.131622	0.308	0.604	0	1	0.509934
AT1G77710	AT1G77710	0	0.131316	0.303	0.605	0	1	0.500826
AT5G48412	AT5G48412	0	0.130433	0.24	0.482	0	1	0.497925
AT2G45070	SEC61 BETA	0	0.129821	0.434	0.734	0	1	0.591281
AT3G48930	RPS11A	0	0.129137	0.463	0.73	0	1	0.634247
AT5G57290	RPP3B	0	0.129083	0.434	0.691	0	1	0.628075
AT1G10865	AT1G10865	0	0.128678	0.19	0.41	0	1	0.463415
AT4G37830	AT4G37830	0	0.128642	0.485	0.784	0	1	0.618622
AT4G35490	MRPL11	0	0.128475	0.287	0.558	0	1	0.514337
AT1G27435	AT1G27435	0	0.128259	0.137	0.315	0	1	0.434921
AT5G02450	RPL36C	0	0.128238	0.535	0.785	0	1	0.681529
AT1G64750	ATDSS1(I)	0	0.128051	0.334	0.631	0	1	0.529319
AT1G62750	CPEFG	0	0.127766	0.262	0.518	0	1	0.505792
AT3G53740	RPL36B	0	0.127708	0.54	0.798	0	1	0.676692
ATCG00500	ACCD	0	0.126538	0.526	0.822	0	1	0.639903
AT3G55750	RPL35AD	0	0.126336	0.353	0.615	0	1	0.573984
ATCG01090	NDHI	0	0.12592	0.165	0.382	0	1	0.431937
AT4G01940	NIFU1	0	0.125249	0.207	0.444	0	1	0.466216
AT3G12965	AT3G12965	0	0.123383	0.193	0.408	0	1	0.473039
AT5G59140	AT5G59140	0	0.123047	0.232	0.485	0	1	0.478351
AT1G15120	AT1G15120	0	0.122236	0.338	0.639	0	1	0.528951
AT2G21580	RPS25B	0	0.120845	0.481	0.749	0	1	0.64219
AT2G43970	LARP6B	0	0.120831	0.335	0.646	0	1	0.518576
AT3G10860	AT3G10860	0	0.120781	0.278	0.558	0	1	0.498208
AT2G17240	AT2G17240	0	0.120741	0.264	0.538	0	1	0.490706
ATCG00650	RPS18	0	0.120674	0.219	0.49	0	1	0.446939
AT1G74270	RPL35AC	0	0.120421	0.271	0.543	0	1	0.499079
AT3G26710	CCB1	0	0.119471	0.212	0.457	0	1	0.463895
AT5G25940	AT5G25940	0	0.119466	0.305	0.594	0	1	0.513468
AT3G44010	RPS29C.1	0	0.119201	0.345	0.628	0	1	0.549363
AT5G27770	RPL22C	0	0.118616	0.385	0.681	0	1	0.565345
AT4G38932	AT4G38932	0	0.118053	0.205	0.447	0	1	0.458613
AT5G58110	AT5G58110	0	0.117628	0.251	0.528	0	1	0.475379
AT5G27700	RPS21C	0	0.11619	0.477	0.763	0	1	0.625164
AT5G05370	AT5G05370	0	0.115902	0.251	0.531	0	1	0.472693
AT5G46250	LARP6A	0	0.115866	0.385	0.683	0	1	0.56369
AT1G16810	AT1G16810	0	0.115686	0.236	0.541	0	1	0.436229
AT3G47370	RPS20B	0	0.115373	0.328	0.593	0	1	0.55312
AT5G24165	AT5G24165	0	0.114783	0.248	0.531	0	1	0.467043
AT4G13940	SAHH1	0	0.114466	0.511	0.782	0	1	0.653453
AT1G09130	AT1G09130	0	0.114139	0.143	0.355	0	1	0.402817
AT1G56070	LOS1	0	0.11367	0.38	0.695	0	1	0.546763
AT3G53890	RPS21B	0	0.113549	0.439	0.72	0	1	0.609722
AT5G03850	RPS28A	0	0.113477	0.33	0.617	0	1	0.534846
AT1G56045	RPL41G	0	0.11329	0.314	0.611	0	1	0.513912
AT3G61110	RPS27B	0	0.112588	0.444	0.724	0	1	0.61326
AT5G52650	RPS10C	0	0.111842	0.413	0.697	0	1	0.592539
AT4G00810	RPP1B	0	0.111747	0.385	0.687	0	1	0.560408
AT2G31490	AT2G31490	0	0.111391	0.25	0.541	0	1	0.462107
AT3G53020	RPL24B	0	0.11103	0.488	0.758	0	1	0.643799
AT5G50920	CLPC1	0	0.11088	0.401	0.723	0	1	0.554633
AT5G43970	TOM9-2	0	0.110629	0.184	0.411	0	1	0.447689
AT2G43640	SRP14	0	0.110513	0.172	0.385	0	1	0.446753
AT5G02610	AT5G02610	0	0.110327	0.355	0.652	0	1	0.544479
AT2G21290	AT2G21290	0	0.109751	0.197	0.454	0	1	0.433921
AT2G27030	CAM5.1	0	0.109293	0.219	0.467	0	1	0.468951
AT3G45030	RPS20C.1	0	0.108851	0.379	0.656	0	1	0.577744
AT3G07780	OBE1	0	0.108775	0.175	0.421	0	1	0.415677
AT2G46540	AT2G46540	0	0.1087	0.198	0.434	0	1	0.456221
AT2G02710	TLP1	0	0.108158	0.231	0.489	0	1	0.472393
AT1G65290	MTACP2	0	0.108098	0.286	0.571	0	1	0.500876
AT3G23325	AT3G23325	0	0.108003	0.215	0.458	0	1	0.469432
AT4G24930	AT4G24930	0	0.107994	0.261	0.535	0	1	0.48785
AT4G29390	RPS30A.2	0	0.10794	0.361	0.671	0	1	0.538003
AT1G09815	POLD4	0	0.107785	0.186	0.415	0	1	0.448193
AT2G24860	AT2G24860	0	0.107661	0.237	0.478	0	1	0.495816
AT5G16470	MBS2	0	0.107427	0.418	0.724	0	1	0.577348
AT1G02560	CLPP5	0	0.107122	0.263	0.539	0	1	0.487941
AT3G11170	FAD7	0	0.107031	0.289	0.572	0	1	0.505245
AT3G58730	VHA-D	0	0.106779	0.218	0.509	0	1	0.428291
AT5G17920	MS1	0	0.106246	0.26	0.547	0	1	0.47532
AT2G44650	CPN10-2	0	0.105622	0.246	0.516	0	1	0.476744
AT5G64350	FKBP12	0	0.105552	0.389	0.697	0	1	0.558106
AT4G02620	VHA-F	0	0.105078	0.261	0.545	0	1	0.478899
AT5G53650	AT5G53650	0	0.104395	0.146	0.361	0	1	0.404432
AT3G13460	ECT2	0	0.10401	0.189	0.457	0	1	0.413567
AT4G26230	RPL31B	0	0.103979	0.395	0.684	0	1	0.577485
AT3G52730	AT3G52730	0	0.103718	0.308	0.603	0	1	0.510779
AT3G24100	AT3G24100	0	0.10345	0.281	0.568	0	1	0.494718
AT2G42210	ATOEP16-3	0	0.103423	0.26	0.556	0	1	0.467626
AT2G14910	AT2G14910	0	0.103173	0.335	0.654	0	1	0.512232
AT5G42190	SKP1B	0	0.103114	0.21	0.496	0	1	0.423387
AT4G00585	AT4G00585	0	0.102679	0.192	0.448	0	1	0.428571
AT1G61780	AT1G61780	0	0.102259	0.254	0.563	0	1	0.451155
AT2G39390	RPL35B	0	0.102252	0.357	0.633	0	1	0.563981
AT2G04390	RPS17A	0	0.102249	0.266	0.539	0	1	0.493506
AT1G54520	AT1G54520	0	0.102181	0.152	0.38	0	1	0.4
AT5G43260	AT5G43260	0	0.102061	0.348	0.613	0	1	0.5677
AT5G46030	AT5G46030	0	0.102024	0.246	0.527	0	1	0.466793
AT4G25030	AT4G25030	0	0.101753	0.267	0.538	0	1	0.496283
[truncated: 14,627 more rows]

## Sheet: Table S2. GO analysis of DEGs
Table S2. GO analysis of differentially expressed genes (DEGs).
_MEMBER_cluster_0	_MEMBER_cluster_1	_MEMBER_cluster_2	_MEMBER_cluster_3	_MEMBER_cluster_4	_MEMBER_cluster_5	_MEMBER_cluster_6	_MEMBER_cluster_7	_MEMBER_cluster_8	_LogP_cluster_0	_LogP_cluster_1	_LogP_cluster_2	_LogP_cluster_3	_LogP_cluster_4	_LogP_cluster_5	_LogP_cluster_6	_LogP_cluster_7	_LogP_cluster_8	GO	_PATTERN_	_RANK_	GiniIndex	Category	CategoryID	Description	PARENT_GO	LogP	Enrichment	Z-score	#TotalGeneInLibrary	#GeneInGO	#GeneInHitList	#GeneInGOAndHitList	%InGO	STDV %InGO	GeneID	Hits	Log(q-value)	EvidenceCutoff	GROUP_ID	FirstInGroupByGini	FirstInGroupByEnrichment	FirstInGroupByLogP	BestLogPInGroup	BestEnrichmentInGroup	BestGiniInGroup	URL
1	1	0	0	0	0	0	0	0	-100	-49.8098	0	0	0	0	0	0	0	GO:0042651	M110000000	2	0.768701	GO Cellular Components	20	thylakoid membrane		-24.6574	2.59829	12.0095	18896	367	2477	125	5.04643	0.43983	814688|815055|815111|815210|816282|816386|816623|816651|816768|817046|817191|817429|817456|817606|817646|818009|818051|818197|818532|818558|818741|819126|819295|819406|819961|820628|820775|821062|821137|821422|822167|822286|822416|823831|823860|823942|824050|824246|824345|824379|824388|824395|824403|824699|824858|824861|825376|825491|825653|825797|826551|826803|826892|826935|827119|827921|827927|…	CRR3|LHCB2.2|PGR5|PSBX|NIP2|SCY1|PSB29|AT2G21160|AT2G22360|GPX1|AT2G26500|ALB3|ftsh3|PSBW|VAR2|AT2G34460|EDA3|FTSZ2-1|PnsL1|RCA|ERD15|AT2G45180|PSI-P|DEG2|AT3G07700|FLU|TRX-M4|AT3G03920|CYP38|Tic62|AOC1|CCL|DEG1|PTAC16|AT3G47070|CHL|MAPR3|PSBO2|G4|PSRP2|AT3G52230|ATPQ|CP33|PPL1|PSRP5|CRD1|ROC4|OEP6|ATHM2|ATPC1|ATPD|PGRL1B|PSAL|AT4G13200|ELIP2|TROL|AT4G02530|AT4G00895|PETC|AT4G01150|PGR5-LIKE A|Nd…	-22.9	4	1	1	1	0	-47.4002	2.77566	0.768701
1	1	0	0	1	0	0	0	0	-100	-66.6448	0	0	-7.09883	0	0	0	0	GO:0009570	M110010000	3	0.748142	GO Cellular Components	20	chloroplast stroma		-47.4002	2.6009	16.7769	18896	701	2477	239	9.64877	0.593253	814643|815055|815120|816050|816055|816546|816623|816652|816672|816677|816954|817046|817513|817569|817636|818009|818107|818197|818302|818343|818382|818558|818859|818911|818973|818978|819010|819206|819295|819353|819386|819406|819961|820021|820236|820664|820775|820951|821049|821060|821137|821260|821292|821451|821584|821861|821870|822033|822306|822335|822396|822411|823588|823623|823741|823831|823906|…	PDE345|LHCB2.2|ACO3|ATHM3|NIR1|AT2G20270|PSB29|TIM|FBA1|AT2G21385|LAP1|GPX1|THIC|PBCP|GSTF9|AT2G34460|AT2G35410|FTSZ2-1|ADK|AT2G37660|CAC3|RCA|GRF9|AT2G43090|SSI2|OASB|COS1|ATI1|PSI-P|CP12-1|GSTF8|DEG2|AT3G07700|AT3G08740|NAP7|GOX2|TRX-M4|LPD1|PYD1|GRF7|CYP38|TRXF1|MTO1|PREP1|AT3G20390|APS1|PKP-ALPHA|HCF101|SKL1|GHS1|CARA|NQR|AT3G44620|RPL9|HTB9|PTAC16|MDH|AT3G47650|CSR1|AAE3|BCAT3|PSBO2|PSRP2|SE…	-44.5774	4	1	0	0	1	-47.4002	2.77566	0.768701
1	1	0	0	1	0	0	0	0	-100	-65.7372	0	0	-6.8747	0	0	0	0	GO:0009532	M110010000	3	0.748937	GO Cellular Components	20	plastid stroma		-46.4162	2.57155	16.5667	18896	709	2477	239	9.64877	0.593253	814643|815055|815120|816050|816055|816546|816623|816652|816672|816677|816954|817046|817513|817569|817636|818009|818107|818197|818302|818343|818382|818558|818859|818911|818973|818978|819010|819206|819295|819353|819386|819406|819961|820021|820236|820664|820775|820951|821049|821060|821137|821260|821292|821451|821584|821861|821870|822033|822306|822335|822396|822411|823588|823623|823741|823831|823906|…	PDE345|LHCB2.2|ACO3|ATHM3|NIR1|AT2G20270|PSB29|TIM|FBA1|AT2G21385|LAP1|GPX1|THIC|PBCP|GSTF9|AT2G34460|AT2G35410|FTSZ2-1|ADK|AT2G37660|CAC3|RCA|GRF9|AT2G43090|SSI2|OASB|COS1|ATI1|PSI-P|CP12-1|GSTF8|DEG2|AT3G07700|AT3G08740|NAP7|GOX2|TRX-M4|LPD1|PYD1|GRF7|CYP38|TRXF1|MTO1|PREP1|AT3G20390|APS1|PKP-ALPHA|HCF101|SKL1|GHS1|CARA|NQR|AT3G44620|RPL9|HTB9|PTAC16|MDH|AT3G47650|CSR1|AAE3|BCAT3|PSBO2|PSRP2|SE…	-43.7872	4	1	0	0	0	-47.4002	2.77566	0.768701
1	1	0	0	1	0	0	0	0	-100	-67.5669	0	0	-3.37474	0	0	0	0	GO:0009579	M110010000	3	0.754109	GO Cellular Components	20	thylakoid		-41.1553	2.76462	15.7858	18896	516	2477	187	7.54945	0.530823	814643|814688|815055|815111|815210|816282|816386|816623|816651|816652|816672|816756|816768|817046|817191|817429|817456|817606|817636|817646|818009|818051|818107|818197|818343|818532|818558|818741|818973|819126|819295|819386|819406|819961|820628|820775|820828|821062|821137|821260|821422|821584|822167|822286|822335|822416|823622|823741|823831|823860|823942|824050|824246|824345|824379|824388|824395|…	PDE345|CRR3|LHCB2.2|PGR5|PSBX|NIP2|SCY1|PSB29|AT2G21160|TIM|FBA1|AT2G22230|AT2G22360|GPX1|AT2G26500|ALB3|ftsh3|PSBW|GSTF9|VAR2|AT2G34460|EDA3|AT2G35410|FTSZ2-1|AT2G37660|PnsL1|RCA|ERD15|SSI2|AT2G45180|PSI-P|GSTF8|DEG2|AT3G07700|FLU|TRX-M4|FAD5|AT3G03920|CYP38|TRXF1|Tic62|AT3G20390|AOC1|CCL|GHS1|DEG1|ACD1|HTB9|PTAC16|AT3G47070|CHL|MAPR3|PSBO2|G4|PSRP2|AT3G52230|ATPQ|CP33|CP29|PPL1|SBPASE|PSRP5|CRD…	-38.9137	4	1	0	0	0	-47.4002	2.77566	0.768701
1	1	0	0	1	0	0	0	0	-100	-60.4596	0	0	-2.62262	0	0	0	0	GO:0031976	M110010000	3	0.759163	GO Cellular Components	20	plastid thylakoid		-33.8975	2.75625	14.2916	18896	429	2477	155	6.25757	0.48664	814643|814688|815055|815111|815210|816282|816386|816623|816651|816672|816756|816768|817046|817191|817429|817456|817606|817646|818009|818051|818197|818532|818558|818973|819126|819295|819406|819961|820628|820775|821062|821137|821260|821422|822167|822286|822335|822416|823622|823741|823831|823860|823942|824050|824246|824345|824379|824388|824395|824403|824514|824699|824858|824861|825360|825376|825491|…	PDE345|CRR3|LHCB2.2|PGR5|PSBX|NIP2|SCY1|PSB29|AT2G21160|FBA1|AT2G22230|AT2G22360|GPX1|AT2G26500|ALB3|ftsh3|PSBW|VAR2|AT2G34460|EDA3|FTSZ2-1|PnsL1|RCA|SSI2|AT2G45180|PSI-P|DEG2|AT3G07700|FLU|TRX-M4|AT3G03920|CYP38|TRXF1|Tic62|AOC1|CCL|GHS1|DEG1|ACD1|HTB9|PTAC16|AT3G47070|CHL|MAPR3|PSBO2|G4|PSRP2|AT3G52230|ATPQ|CP33|CP29|PPL1|PSRP5|CRD1|AT3G61870|ROC4|OEP6|ATHM2|ATPC1|ATPD|PGRL1B|PSAL|AT4G13200|ELI…	-32.0041	4	1	0	0	0	-47.4002	2.77566	0.768701
1	1	0	0	1	0	0	0	0	-100	-40.9754	0	0	-4.66028	0	0	0	0	GO:0009526	M110010000	3	0.766819	GO Cellular Components	20	plastid envelope		-28.1747	2.2739	12.569	18896	624	2477	186	7.50908	0.529517	815055|815374|816104|816246|816282|816464|816623|816652|816672|816677|816768|817046|817646|817901|818009|818382|818558|818594|818821|818978|819056|819295|819353|819362|819386|819396|819406|820005|820206|820288|820437|820606|820628|820775|820914|820951|821422|821451|821584|822167|822402|823622|823623|823831|823860|823906|824379|824388|824746|824775|824858|824861|825030|825316|825360|825376|825491|…	LHCB2.2|AT2G07698|PDV2|AKR2B|NIP2|TAG1|PSB29|TIM|FBA1|AT2G21385|AT2G22360|GPX1|VAR2|RD20|AT2G34460|CAC3|RCA|CLC2|OEP16-3|OASB|PEN2|PSI-P|CP12-1|NDT1|GSTF8|Tic20-II|DEG2|AAC1|SPD1|FAD7|FYD|AT3G13930|FLU|TRX-M4|VDAC1|LPD1|Tic62|PREP1|AT3G20390|AOC1|MDAR4|ACD1|RPL9|PTAC16|AT3G47070|MDH|PSRP2|AT3G52230|SBPASE|FER3|PSRP5|CRD1|AT3G58610|PIP1A|AT3G61870|ROC4|OEP6|APG1|ATPC1|ATPD|PSAL|AT4G13200|CLPR4|AT4…	-26.3756	4	1	0	0	0	-47.4002	2.77566	0.768701
1	1	0	0	1	0	0	0	0	-100	-60.9125	0	0	-2.68327	0	0	0	0	GO:0009534	M110010000	3	0.758803	GO Cellular Components	20	chloroplast thylakoid		-34.3099	2.77566	14.3977	18896	426	2477	155	6.25757	0.48664	814643|814688|815055|815111|815210|816282|816386|816623|816651|816672|816756|816768|817046|817191|817429|817456|817606|817646|818009|818051|818197|818532|818558|818973|819126|819295|819406|819961|820628|820775|821062|821137|821260|821422|822167|822286|822335|822416|823622|823741|823831|823860|823942|824050|824246|824345|824379|824388|824395|824403|824514|824699|824858|824861|825360|825376|825491|…	PDE345|CRR3|LHCB2.2|PGR5|PSBX|NIP2|SCY1|PSB29|AT2G21160|FBA1|AT2G22230|AT2G22360|GPX1|AT2G26500|ALB3|ftsh3|PSBW|VAR2|AT2G34460|EDA3|FTSZ2-1|PnsL1|RCA|SSI2|AT2G45180|PSI-P|DEG2|AT3G07700|FLU|TRX-M4|AT3G03920|CYP38|TRXF1|Tic62|AOC1|CCL|GHS1|DEG1|ACD1|HTB9|PTAC16|AT3G47070|CHL|MAPR3|PSBO2|G4|PSRP2|AT3G52230|ATPQ|CP33|CP29|PPL1|PSRP5|CRD1|AT3G61870|ROC4|OEP6|ATHM2|ATPC1|ATPD|PGRL1B|PSAL|AT4G13200|ELI…	-32.4002	4	1	0	0	0	-47.4002	2.77566	0.768701
1	1	0	0	0	0	0	0	0	-100	-51.6124	0	0	0	0	0	0	0	GO:0055035	M110000000	2	0.767542	GO Cellular Components	20	plastid thylakoid membrane		-25.5043	2.70837	12.3094	18896	338	2477	120	4.84457	0.431401	814688|815055|815111|815210|816282|816386|816623|816651|816768|817046|817191|817429|817456|817606|817646|818009|818051|818197|818532|818558|819126|819295|819406|819961|820628|820775|821062|821137|821422|822167|822286|822416|823831|823860|823942|824050|824246|824345|824379|824388|824395|824403|824699|824858|824861|825376|825491|825653|825797|826551|826803|826892|826935|827119|827921|827927|827987|…	CRR3|LHCB2.2|PGR5|PSBX|NIP2|SCY1|PSB29|AT2G21160|AT2G22360|GPX1|AT2G26500|ALB3|ftsh3|PSBW|VAR2|AT2G34460|EDA3|FTSZ2-1|PnsL1|RCA|AT2G45180|PSI-P|DEG2|AT3G07700|FLU|TRX-M4|AT3G03920|CYP38|Tic62|AOC1|CCL|DEG1|PTAC16|AT3G47070|CHL|MAPR3|PSBO2|G4|PSRP2|AT3G52230|ATPQ|CP33|PPL1|PSRP5|CRD1|ROC4|OEP6|ATHM2|ATPC1|ATPD|PGRL1B|PSAL|AT4G13200|ELIP2|TROL|AT4G02530|AT4G00895|PETC|AT4G01150|PGR5-LIKE A|NdhS|AT4…	-23.7375	4	1	0	0	0	-47.4002	2.77566	0.768701
1	1	0	0	0	0	0	0	0	-100	-51.5972	0	0	0	0	0	0	0	GO:0044436	M110000000	2	0.767551	GO Cellular Components	20	thylakoid part		-26.458	2.62233	12.475	18896	384	2477	132	5.32903	0.451304	814688|815055|815111|815210|816282|816386|816623|816651|816672|816768|817046|817191|817429|817456|817606|817646|818009|818051|818197|818532|818558|818741|819126|819295|819406|819961|820628|820775|821062|821137|821422|822167|822286|822416|823831|823860|823942|824050|824246|824345|824379|824388|824395|824403|824699|824858|824861|825376|825491|825653|825797|826551|826803|826892|826935|827119|827564|…	CRR3|LHCB2.2|PGR5|PSBX|NIP2|SCY1|PSB29|AT2G21160|FBA1|AT2G22360|GPX1|AT2G26500|ALB3|ftsh3|PSBW|VAR2|AT2G34460|EDA3|FTSZ2-1|PnsL1|RCA|ERD15|AT2G45180|PSI-P|DEG2|AT3G07700|FLU|TRX-M4|AT3G03920|CYP38|Tic62|AOC1|CCL|DEG1|PTAC16|AT3G47070|CHL|MAPR3|PSBO2|G4|PSRP2|AT3G52230|ATPQ|CP33|PPL1|PSRP5|CRD1|ROC4|OEP6|ATHM2|ATPC1|ATPD|PGRL1B|PSAL|AT4G13200|ELIP2|DEG5|TROL|AT4G02530|AT4G00895|PETC|AT4G01150|PGR5…	-24.6815	4	1	0	0	0	-47.4002	2.77566	0.768701
1	1	0	0	0	0	0	0	0	-100	-50.5185	0	0	0	0	0	0	0	GO:0034357	M110000000	2	0.768242	GO Cellular Components	20	photosynthetic membrane		-25.0897	2.61196	12.1291	18896	368	2477	126	5.0868	0.441492	814688|815055|815111|815210|816282|816386|816623|816651|816768|817046|817191|817429|817456|817606|817646|818009|818051|818197|818532|818558|818741|819126|819295|819406|819961|820628|820775|821062|821137|821422|822167|822286|822416|823831|823860|823942|824050|824246|824345|824379|824388|824395|824403|824699|824858|824861|825376|825491|825653|825797|826551|826803|826892|826935|827119|827921|827927|…	CRR3|LHCB2.2|PGR5|PSBX|NIP2|SCY1|PSB29|AT2G21160|AT2G22360|GPX1|AT2G26500|ALB3|ftsh3|PSBW|VAR2|AT2G34460|EDA3|FTSZ2-1|PnsL1|RCA|ERD15|AT2G45180|PSI-P|DEG2|AT3G07700|FLU|TRX-M4|AT3G03920|CYP38|Tic62|AOC1|CCL|DEG1|PTAC16|AT3G47070|CHL|MAPR3|PSBO2|G4|PSRP2|AT3G52230|ATPQ|CP33|PPL1|PSRP5|CRD1|ROC4|OEP6|ATHM2|ATPC1|ATPD|PGRL1B|PSAL|AT4G13200|ELIP2|TROL|AT4G02530|AT4G00895|PETC|AT4G01150|PGR5-LIKE A|Nd…	-23.3252	4	1	0	0	0	-47.4002	2.77566	0.768701
1	1	0	0	1	0	0	0	0	-100	-40.3205	0	0	-4.1592	0	0	0	0	GO:0009941	M110010000	3	0.768328	GO Cellular Components	20	chloroplast envelope		-27.442	2.28097	12.4064	18896	602	2477	180	7.26686	0.521588	815055|815374|816104|816246|816464|816623|816652|816672|816677|816768|817046|817646|817901|818009|818382|818558|818594|818978|819056|819295|819353|819362|819386|819396|819406|820005|820206|820288|820437|820606|820628|820775|820914|820951|821422|821451|821584|822167|822402|823622|823623|823831|823860|823906|824379|824388|824746|824775|824858|824861|825030|825316|825360|825376|825491|825516|825797|…	LHCB2.2|AT2G07698|PDV2|AKR2B|TAG1|PSB29|TIM|FBA1|AT2G21385|AT2G22360|GPX1|VAR2|RD20|AT2G34460|CAC3|RCA|CLC2|OASB|PEN2|PSI-P|CP12-1|NDT1|GSTF8|Tic20-II|DEG2|AAC1|SPD1|FAD7|FYD|AT3G13930|FLU|TRX-M4|VDAC1|LPD1|Tic62|PREP1|AT3G20390|AOC1|MDAR4|ACD1|RPL9|PTAC16|AT3G47070|MDH|PSRP2|AT3G52230|SBPASE|FER3|PSRP5|CRD1|AT3G58610|PIP1A|AT3G61870|ROC4|OEP6|APG1|ATPC1|ATPD|PSAL|AT4G13200|CLPR4|AT4G17560|TROL|A…	-25.6506	4	1	0	0	0	-47.4002	2.77566	0.768701
1	1	0	0	0	0	0	0	0	-100	-51.6791	0	0	0	0	0	0	0	GO:0009535	M110000000	2	0.767499	GO Cellular Components	20	chloroplast thylakoid membrane		-25.7183	2.73434	12.3831	18896	332	2477	119	4.8042	0.429691	814688|815055|815111|815210|816282|816386|816623|816651|816768|817046|817191|817429|817456|817606|817646|818009|818051|818197|818532|818558|819126|819295|819406|819961|820628|820775|821062|821137|821422|822167|822286|822416|823831|823860|823942|824050|824246|824345|824379|824388|824395|824403|824699|824858|824861|825376|825491|825653|825797|826551|826803|826892|826935|827119|827921|827927|827987|…	CRR3|LHCB2.2|PGR5|PSBX|NIP2|SCY1|PSB29|AT2G21160|AT2G22360|GPX1|AT2G26500|ALB3|ftsh3|PSBW|VAR2|AT2G34460|EDA3|FTSZ2-1|PnsL1|RCA|AT2G45180|PSI-P|DEG2|AT3G07700|FLU|TRX-M4|AT3G03920|CYP38|Tic62|AOC1|CCL|DEG1|PTAC16|AT3G47070|CHL|MAPR3|PSBO2|G4|PSRP2|AT3G52230|ATPQ|CP33|PPL1|PSRP5|CRD1|ROC4|OEP6|ATHM2|ATPC1|ATPD|PGRL1B|PSAL|AT4G13200|ELIP2|TROL|AT4G02530|AT4G00895|PETC|AT4G01150|PGR5-LIKE A|NdhS|AT4…	-23.949	4	1	0	0	0	-47.4002	2.77566	0.768701
1	0	0	0	1	0	0	0	0	-11.0277	0	0	0	-2.2199	0	0	0	0	GO:0046148	M100010000	2	0.480391	GO Biological Processes	19	pigment biosynthetic process	19_GO:0008152 metabolic process	-2.95253	1.70639	3.39626	18896	152	2477	34	1.37263	0.233783	817195|817208|819059|820628|820960|821710|824345|824861|827119|827230|827580|828387|828675|829560|830724|831505|835165|835334|835788|836244|836476|837168|837374|837528|837610|838668|839009|839636|842198|842700|842760|843310|843443|844193	HEMD|TED4|COX10|FLU|IPP2|UGT84A2|G4|CRD1|ELIP2|CLA1|CHLI1|LDOX|BETA-OHASE 1|UGT73B2|HEMC|IPP1|CLPC1|BETA-OHASE 2|GNC|ANK6|GSA1|PDS1|ALB1|HEMA2|ACLA-1|SAUL1|POR C|APT1|HEMA1|ISPF|RPN12a|HEMB1|MYBL2|RHM1	-2.6281	4	2	0	0	0	-7.2569	3.51881	0.572155
1	0	0	0	0	0	0	0	0	-7.12229	0	0	0	0	0	0	0	0	GO:0046501	M100000000	1	0.359868	GO Biological Processes	19	protoporphyrinogen IX metabolic process	19_GO:0008152 metabolic process	-2.36508	3.51881	3.49492	18896	15	2148	6	0.27933	0.113876	817195|830724|836476|837528|842198|843310	HEMD|HEMC|GSA1|HEMA2|HEMA1|HEMB1	-2.13158	5	2	0	0	0	-7.2569	3.51881	0.572155
1	0	0	0	0	0	0	0	0	-7.12229	0	0	0	0	0	0	0	0	GO:0006782	M100000000	1	0.359868	GO Biological Processes	19	protoporphyrinogen IX biosynthetic process	19_GO:0008152 metabolic process	-2.36508	3.51881	3.49492	18896	15	2148	6	0.27933	0.113876	817195|830724|836476|837528|842198|843310	HEMD|HEMC|GSA1|HEMA2|HEMA1|HEMB1	-2.13158	5	2	0	0	0	-7.2569	3.51881	0.572155
1	0	0	0	1	0	0	0	0	-10.2312	0	0	0	-2.79529	0	0	0	0	GO:0042440	M100010000	2	0.469497	GO Biological Processes	19	pigment metabolic process	19_GO:0008152 metabolic process	-3.06485	1.71185	3.48447	18896	185	2148	36	1.67598	0.276979	816623|817195|817208|820628|820960|821463|821710|823622|824345|824861|826942|827230|827580|828387|828675|829560|830724|831225|831505|834363|835165|835334|836244|836476|837168|837374|837528|837610|839009|839636|842198|842700|842760|843310|843443|844193	PSB29|HEMD|TED4|FLU|IPP2|ABF4|UGT84A2|ACD1|G4|CRD1|NYC1|CLA1|CHLI1|LDOX|BETA-OHASE 1|UGT73B2|HEMC|PPH|IPP1|ETFBETA|CLPC1|BETA-OHASE 2|ANK6|GSA1|PDS1|ALB1|HEMA2|ACLA-1|POR C|APT1|HEMA1|ISPF|RPN12a|HEMB1|MYBL2|RHM1	-2.7205	5	2	0	0	0	-7.2569	3.51881	0.572155
1	1	0	0	1	0	0	0	0	-11.4887	-2.29677	0	0	-2.2589	0	0	0	0	ko00860	M110010000	3	0.487531	KEGG Pathway	24	Porphyrin and chlorophyll metabolism		-3.85145	2.80756	4.44331	18896	47	2148	15	0.698324	0.179676	817195|817208|823622|824345|824861|826942|827580|830724|836476|837374|837528|839009|839472|842198|843310	HEMD|TED4|ACD1|G4|CRD1|NYC1|CHLI1|HEMC|GSA1|ALB1|HEMA2|POR C|HCAR|HEMA1|HEMB1	-3.38843	5	2	0	0	0	-7.2569	3.51881	0.572155
1	1	0	0	1	0	0	0	0	-11.4887	-2.29677	0	0	-2.2589	0	0	0	0	ath00860	M110010000	3	0.487531	KEGG Pathway	24	Porphyrin and chlorophyll metabolism		-3.85145	2.80756	4.44331	18896	47	2148	15	0.698324	0.179676	817195|817208|823622|824345|824861|826942|827580|830724|836476|837374|837528|839009|839472|842198|843310	HEMD|TED4|ACD1|G4|CRD1|NYC1|CHLI1|HEMC|GSA1|ALB1|HEMA2|POR C|HCAR|HEMA1|HEMB1	-3.38843	5	2	0	0	0	-7.2569	3.51881	0.572155
1	1	0	0	0	0	0	0	0	-15.4021	-2.78095	0	0	0	0	0	0	0	GO:0033014	M110000000	2	0.555499	GO Biological Processes	19	tetrapyrrole biosynthetic process	19_GO:0008152 metabolic process	-4.45128	2.40353	4.6666	18896	73	2477	23	0.928543	0.192714	817195|817208|819059|820628|820960|824345|824861|827119|827230|827580|830724|831505|835165|835788|836476|837374|837528|837610|838668|839009|842198|842700|843310	HEMD|TED4|COX10|FLU|IPP2|G4|CRD1|ELIP2|CLA1|CHLI1|HEMC|IPP1|CLPC1|GNC|GSA1|ALB1|HEMA2|ACLA-1|SAUL1|POR C|HEMA1|ISPF|HEMB1	-3.90921	4	2	0	0	0	-7.2569	3.51881	0.572155
1	1	0	0	0	0	0	0	0	-15.3829	-2.8688	0	0	0	0	0	0	0	GO:0015995	M110000000	2	0.555633	GO Biological Processes	19	chlorophyll biosynthetic process	19_GO:0008152 metabolic process	-4.52561	2.54286	4.76431	18896	63	2477	21	0.8478	0.184219	817195|820628|820960|824345|824861|827119|827230|827580|830724|831505|835165|835788|836476|837374|837528|837610|838668|839009|842198|842700|843310	HEMD|FLU|IPP2|G4|CRD1|ELIP2|CLA1|CHLI1|HEMC|IPP1|CLPC1|GNC|GSA1|ALB1|HEMA2|ACLA-1|SAUL1|POR C|HEMA1|ISPF|HEMB1	-3.97215	4	2	0	0	0	-7.2569	3.51881	0.572155
1	1	0	0	1	0	0	0	0	-16.8934	-3.51522	0	0	-3.45021	0	0	0	0	GO:0015994	M110010000	3	0.565771	GO Biological Processes	19	chlorophyll metabolic process	19_GO:0008152 metabolic process	-7.2569	2.74984	6.31707	18896	86	2477	31	1.25151	0.223368	816623|817195|820118|820628|820960|821463|823622|824345|824861|826942|827119|827230|827580|830724|831225|831505|833840|834363|835165|835788|836476|837374|837528|837610|838668|839009|839472|842073|842198|842700|843310	PSB29|HEMD|SOX|FLU|IPP2|ABF4|ACD1|G4|CRD1|NYC1|ELIP2|CLA1|CHLI1|HEMC|PPH|IPP1|AT5G38520|ETFBETA|CLPC1|GNC|GSA1|ALB1|HEMA2|ACLA-1|SAUL1|POR C|HCAR|EMB1303|HEMA1|ISPF|HEMB1	-6.43408	4	2	0	0	1	-7.2569	3.51881	0.572155
1	1	0	0	1	0	0	0	0	-17.3033	-3.21954	0	0	-3.154	0	0	0	0	GO:0033013	M110010000	3	0.570439	GO Biological Processes	19	tetrapyrrole metabolic process	19_GO:0008152 metabolic process	-6.62897	2.51743	5.90935	18896	100	2477	33	1.33226	0.230366	816623|817195|817208|819059|820118|820628|820960|821463|823622|824345|824861|826942|827119|827230|827580|830724|831225|831505|833840|834363|835165|835788|836476|837374|837528|837610|838668|839009|839472|842073|842198|842700|843310	PSB29|HEMD|TED4|COX10|SOX|FLU|IPP2|ABF4|ACD1|G4|CRD1|NYC1|ELIP2|CLA1|CHLI1|HEMC|PPH|IPP1|AT5G38520|ETFBETA|CLPC1|GNC|GSA1|ALB1|HEMA2|ACLA-1|SAUL1|POR C|HCAR|EMB1303|HEMA1|ISPF|HEMB1	-5.85609	4	2	0	0	0	-7.2569	3.51881	0.572155
1	1	0	0	1	0	0	0	0	-17.4693	-3.27147	0	0	-3.20553	0	0	0	0	GO:0006778	M110010000	3	0.572155	GO Biological Processes	19	porphyrin-containing compound metabolic process	19_GO:0008152 metabolic process	-6.745	2.54286	5.9781	18896	99	2477	33	1.33226	0.230366	816623|817195|817208|819059|820118|820628|820960|821463|823622|824345|824861|826942|827119|827230|827580|830724|831225|831505|833840|834363|835165|835788|836476|837374|837528|837610|838668|839009|839472|842073|842198|842700|843310	PSB29|HEMD|TED4|COX10|SOX|FLU|IPP2|ABF4|ACD1|G4|CRD1|NYC1|ELIP2|CLA1|CHLI1|HEMC|PPH|IPP1|AT5G38520|ETFBETA|CLPC1|GNC|GSA1|ALB1|HEMA2|ACLA-1|SAUL1|POR C|HCAR|EMB1303|HEMA1|ISPF|HEMB1	-5.9606	4	2	1	1	0	-7.2569	3.51881	0.572155
1	1	0	0	0	0	0	0	0	-14.9856	-2.46599	0	0	0	0	0	0	0	GO:0006779	M110000000	2	0.548388	GO Biological Processes	19	porphyrin-containing compound biosynthetic process	19_GO:0008152 metabolic process	-4.26608	2.39755	4.5499	18896	70	2477	22	0.888171	0.188516	817195|819059|820628|820960|824345|824861|827119|827230|827580|830724|831505|835165|835788|836476|837374|837528|837610|838668|839009|842198|842700|843310	HEMD|COX10|FLU|IPP2|G4|CRD1|ELIP2|CLA1|CHLI1|HEMC|IPP1|CLPC1|GNC|GSA1|ALB1|HEMA2|ACLA-1|SAUL1|POR C|HEMA1|ISPF|HEMB1	-3.74767	4	2	0	0	0	-7.2569	3.51881	0.572155
1	1	1	0	0	1	0	1	1	-11.3596	-25.211	-20.6237	0	0	-31.1524	0	-2.50463	-32.1356	GO:0030964	M111001011	6	0.496596	GO Cellular Components	20	NADH dehydrogenase complex		-37.724	13.4904	22.1129	18896	58	966	40	4.14079	0.641017	814736|814780|816555|816575|817319|817707|817884|818821|819382|819805|820008|820406|821104|821133|821370|825454|827343|827761|828130|829622|830353|830752|830768|830770|831049|831998|833729|834807|834840|835361|836783|836895|838007|838239|839465|841337|843056|843104|843953|844242	AT2G02050|AT2G02510|AT2G20360|PHB6|AT2G27730|AT2G31490|AT2G33220|OEP16-3|AT2G47690|AT3G06310|AT3G08610|AT3G12260|AT3G03100|AT3G03070|AT3G18410|AT3G62790|AT4G16450|AT4G20150|AT4G02580|CIB22|AT5G04750|CI51|AT5G08670|AT5G08690|AT5G11770|AT5G18800|EMB1467|AT5G47570|AT5G47890|AT5G52840|GAMMA CA3|FRO1|AT1G14450|AT1G16700|MEE4|AT1G49140|AT1G67350|AT1G67785|AT1G76200|AT1G79010	-35.6971	9	3	0	0	0	-60.337	13.7271	0.526472
1	1	1	0	0	1	0	1	1	-11.5392	-25.5826	-20.9988	0	0	-31.5694	0	-2.54803	-32.6356	GO:0045271	M111001011	6	0.496787	GO Cellular Components	20	respiratory chain complex I		-38.2108	13.7271	22.3362	18896	57	966	40	4.14079	0.641017	814736|814780|816555|816575|817319|817707|817884|818821|819382|819805|820008|820406|821104|821133|821370|825454|827343|827761|828130|829622|830353|830752|830768|830770|831049|831998|833729|834807|834840|835361|836783|836895|838007|838239|839465|841337|843056|843104|843953|844242	AT2G02050|AT2G02510|AT2G20360|PHB6|AT2G27730|AT2G31490|AT2G33220|OEP16-3|AT2G47690|AT3G06310|AT3G08610|AT3G12260|AT3G03100|AT3G03070|AT3G18410|AT3G62790|AT4G16450|AT4G20150|AT4G02580|CIB22|AT5G04750|CI51|AT5G08670|AT5G08690|AT5G11770|AT5G18800|EMB1467|AT5G47570|AT5G47890|AT5G52840|GAMMA CA3|FRO1|AT1G14450|AT1G16700|MEE4|AT1G49140|AT1G67350|AT1G67785|AT1G76200|AT1G79010	-36.1572	9	3	0	0	0	-60.337	13.7271	0.526472
1	1	1	0	0	1	0	1	1	-11.5392	-25.5826	-20.9988	0	0	-31.5694	0	-2.54803	-32.6356	GO:0005747	M111001011	6	0.496787	GO Cellular Components	20	mitochondrial respiratory chain complex I		-38.2108	13.7271	22.3362	18896	57	966	40	4.14079	0.641017	814736|814780|816555|816575|817319|817707|817884|818821|819382|819805|820008|820406|821104|821133|821370|825454|827343|827761|828130|829622|830353|830752|830768|830770|831049|831998|833729|834807|834840|835361|836783|836895|838007|838239|839465|841337|843056|843104|843953|844242	AT2G02050|AT2G02510|AT2G20360|PHB6|AT2G27730|AT2G31490|AT2G33220|OEP16-3|AT2G47690|AT3G06310|AT3G08610|AT3G12260|AT3G03100|AT3G03070|AT3G18410|AT3G62790|AT4G16450|AT4G20150|AT4G02580|CIB22|AT5G04750|CI51|AT5G08670|AT5G08690|AT5G11770|AT5G18800|EMB1467|AT5G47570|AT5G47890|AT5G52840|GAMMA CA3|FRO1|AT1G14450|AT1G16700|MEE4|AT1G49140|AT1G67350|AT1G67785|AT1G76200|AT1G79010	-36.1572	9	3	0	0	0	-60.337	13.7271	0.526472
1	1	1	0	0	1	0	1	1	-6.95398	-33.7194	-39.1082	0	0	-36.0582	0	-2.68727	-35.5467	GO:0098798	M111001011	6	0.506108	GO Cellular Components	20	mitochondrial protein complex		-47.0169	6.3395	20.5714	18896	211	1229	87	7.07893	0.731585	814736|814780|815343|816555|816575|816723|817319|817707|817884|818673|818821|819247|819261|819382|819805|819982|820008|820256|820406|820547|821078|821084|821088|821104|821133|821211|821370|821799|823793|823938|824395|824439|825454|827343|827761|828026|828130|828727|829069|829124|829622|829939|830147|830353|830419|830698|830752|830768|830770|831049|831186|831260|831638|831998|833729|834065|834094|…	AT2G02050|AT2G02510|AT2G07671|AT2G20360|PHB6|MGP1|AT2G27730|AT2G31490|AT2G33220|AT2G40765|OEP16-3|SDH8|SDH4|AT2G47690|AT3G06310|AT3G07910|AT3G08610|AT3G10860|AT3G12260|DIN4|AT3G01790|MPPBETA|AT3G01740|AT3G03100|AT3G03070|RPS2|AT3G18410|RPS10|AT3G46430|SDH7|ATPQ|AT3G52730|AT3G62790|AT4G16450|AT4G20150|AT4G00585|AT4G02580|AT4G26210|AT4G29480|AT4G30010|CIB22|AT4G37830|AT4G39880|AT5G04750|AT5G05370|T…	-44.3122	8	3	0	0	0	-60.337	13.7271	0.526472
1	1	1	0	0	1	0	1	1	-4.70253	-31.9497	-37.3634	0	0	-35.1046	0	-4.03042	-38.2769	GO:0044455	M111001011	6	0.509878	GO Cellular Components	20	mitochondrial membrane part		-42.9519	6.04803	19.4484	18896	211	1229	83	6.75346	0.71582	814736|814780|815343|816555|816575|816723|817319|817707|817884|818673|818821|819247|819261|819351|819382|819805|819982|820008|820256|820406|821084|821104|821133|821370|823793|823938|824395|824439|824876|825413|825454|825844|827343|827761|828026|828130|828727|829069|829124|829622|829939|830353|830419|830698|830752|830768|830770|831049|831114|831186|831252|831260|831638|831998|832838|833729|834065|…	AT2G02050|AT2G02510|AT2G07671|AT2G20360|PHB6|MGP1|AT2G27730|AT2G31490|AT2G33220|AT2G40765|OEP16-3|SDH8|SDH4|AT2G47380|AT2G47690|AT3G06310|AT3G07910|AT3G08610|AT3G10860|AT3G12260|MPPBETA|AT3G03100|AT3G03070|AT3G18410|AT3G46430|SDH7|ATPQ|AT3G52730|BIGYIN|AT3G62400|AT3G62790|NDB2|AT4G16450|AT4G20150|AT4G00585|AT4G02580|AT4G26210|AT4G29480|AT4G30010|CIB22|AT4G37830|AT5G04750|AT5G05370|TOM5|CI51|AT5G0…	-40.5684	8	3	0	0	0	-60.337	13.7271	0.526472
1	1	1	0	0	1	0	1	1	-7.31528	-34.8833	-38.0147	0	0	-40.3198	0	-3.45806	-43.2778	GO:0098800	M111001011	6	0.512294	GO Cellular Components	20	inner mitochondrial membrane protein complex		-47.2903	7.79432	21.586	18896	144	1229	73	5.93979	0.674237	814736|814780|815343|816555|816575|816723|817319|817707|817884|818673|818821|819247|819261|819382|819805|819982|820008|820256|820406|821084|821104|821133|821370|823793|823938|824395|824439|825454|827343|827761|828026|828130|828727|829069|829124|829622|829939|830353|830419|830752|830768|830770|831049|831186|831260|831638|831998|833729|834065|834094|834749|834807|834840|835361|835613|836081|836783|…	AT2G02050|AT2G02510|AT2G07671|AT2G20360|PHB6|MGP1|AT2G27730|AT2G31490|AT2G33220|AT2G40765|OEP16-3|SDH8|SDH4|AT2G47690|AT3G06310|AT3G07910|AT3G08610|AT3G10860|AT3G12260|MPPBETA|AT3G03100|AT3G03070|AT3G18410|AT3G46430|SDH7|ATPQ|AT3G52730|AT3G62790|AT4G16450|AT4G20150|AT4G00585|AT4G02580|AT4G26210|AT4G29480|AT4G30010|CIB22|AT4G37830|AT5G04750|AT5G05370|CI51|AT5G08670|AT5G08690|AT5G11770|ATP5|AT5G141…	-44.4938	8	3	0	0	0	-60.337	13.7271	0.526472
1	1	1	0	0	1	0	1	1	-8.98575	-30.9326	-30.4025	0	0	-39.0648	0	-4.15518	-44.1099	GO:0098803	M111001011	6	0.515607	GO Cellular Components	20	respiratory chain complex		-48.7959	11.8615	24.5033	18896	94	966	57	5.90062	0.758147	814736|814780|816555|816575|817319|817707|817884|818673|818821|819247|819261|819382|819805|820008|820256|820406|821084|821104|821133|821370|822359|823793|823938|824439|825454|827343|827761|828130|829622|829939|830353|830752|830768|830770|831049|831998|833729|834065|834807|834840|835361|836081|836783|836809|836895|837369|838007|838075|838239|839465|841147|841337|841627|843056|843104|843953|844242	AT2G02050|AT2G02510|AT2G20360|PHB6|AT2G27730|AT2G31490|AT2G33220|AT2G40765|OEP16-3|SDH8|SDH4|AT2G47690|AT3G06310|AT3G08610|AT3G10860|AT3G12260|MPPBETA|AT3G03100|AT3G03070|AT3G18410|SDH2-1|AT3G46430|SDH7|AT3G52730|AT3G62790|AT4G16450|AT4G20150|AT4G02580|CIB22|AT4G37830|AT5G04750|CI51|AT5G08670|AT5G08690|AT5G11770|AT5G18800|EMB1467|SDH2-2|AT5G47570|AT5G47890|AT5G52840|AT5G59613|GAMMA CA3|SDH1-1|FRO…	-45.8103	9	3	0	0	0	-60.337	13.7271	0.526472
1	1	1	0	0	1	0	1	1	-8.98575	-33.3138	-30.4025	0	0	-43.1344	0	-4.83121	-44.1099	GO:0005746	M111001011	6	0.515288	GO Cellular Components	20	mitochondrial respiratory chain		-51.7957	12.2777	25.4422	18896	94	966	59	6.10766	0.770485	814736|814780|816555|816575|817319|817707|817884|818673|818821|819247|819261|819351|819382|819805|820008|820256|820406|821084|821104|821133|821370|823793|823938|824439|825413|825454|827343|827761|828130|829622|829939|830353|830752|830768|830770|831049|831998|832838|833729|834065|834807|834840|835361|836081|836783|836809|836895|837369|838007|838075|838239|839465|841147|841337|841627|843056|843104|…	AT2G02050|AT2G02510|AT2G20360|PHB6|AT2G27730|AT2G31490|AT2G33220|AT2G40765|OEP16-3|SDH8|SDH4|AT2G47380|AT2G47690|AT3G06310|AT3G08610|AT3G10860|AT3G12260|MPPBETA|AT3G03100|AT3G03070|AT3G18410|AT3G46430|SDH7|AT3G52730|AT3G62400|AT3G62790|AT4G16450|AT4G20150|AT4G02580|CIB22|AT4G37830|AT5G04750|CI51|AT5G08670|AT5G08690|AT5G11770|AT5G18800|AT5G27760|EMB1467|SDH2-2|AT5G47570|AT5G47890|AT5G52840|AT5G596…	-48.3708	9	3	0	0	0	-60.337	13.7271	0.526472
1	1	1	0	0	1	0	1	1	-3.72143	-28.5261	-36.2234	0	0	-33.8101	0	-4.18855	-37.9682	GO:0031966	M111001011	6	0.518438	GO Cellular Components	20	mitochondrial membrane		-39.5433	5.22397	18.0531	18896	259	1229	88	7.16029	0.735455	814736|814780|815343|816555|816575|816723|817319|817707|817884|818673|818821|819247|819261|819351|819382|819805|819982|820008|820256|820406|820914|821084|821104|821133|821370|823793|823938|824395|824439|824578|824876|825413|825454|825844|827343|827761|828026|828130|828727|829069|829124|829622|829939|830353|830419|830698|830752|830768|830770|831049|831114|831186|831252|831260|831361|831638|831998|…	AT2G02050|AT2G02510|AT2G07671|AT2G20360|PHB6|MGP1|AT2G27730|AT2G31490|AT2G33220|AT2G40765|OEP16-3|SDH8|SDH4|AT2G47380|AT2G47690|AT3G06310|AT3G07910|AT3G08610|AT3G10860|AT3G12260|VDAC1|MPPBETA|AT3G03100|AT3G03070|AT3G18410|AT3G46430|SDH7|ATPQ|AT3G52730|PUMP1|BIGYIN|AT3G62400|AT3G62790|NDB2|AT4G16450|AT4G20150|AT4G00585|AT4G02580|AT4G26210|AT4G29480|AT4G30010|CIB22|AT4G37830|AT5G04750|AT5G05370|TOM…	-37.4248	8	3	0	0	0	-60.337	13.7271	0.526472
1	1	1	0	0	1	0	1	1	-3.4202	-33.7352	-42.7463	0	0	-40.7928	0	-5.04833	-39.7359	GO:0005740	M111001011	6	0.519881	GO Cellular Components	20	mitochondrial envelope		-46.2952	5.4362	19.7249	18896	280	1229	99	8.05533	0.776299	814736|814780|815343|816555|816575|816723|817319|817502|817707|817884|818673|818821|819247|819261|819351|819382|819567|819805|819982|820005|820008|820256|820406|820914|821084|821104|821133|821370|823793|823809|823938|824395|824439|824459|824578|824876|825413|825454|825844|826595|827343|827761|828026|828130|828727|829069|829124|829622|829939|830353|830419|830698|830752|830768|830770|831049|831114|…	AT2G02050|AT2G02510|AT2G07671|AT2G20360|PHB6|MGP1|AT2G27730|TIM10|AT2G31490|AT2G33220|AT2G40765|OEP16-3|SDH8|SDH4|AT2G47380|AT2G47690|GAPC1|AT3G06310|AT3G07910|AAC1|AT3G08610|AT3G10860|AT3G12260|VDAC1|MPPBETA|AT3G03100|AT3G03070|AT3G18410|AT3G46430|TIM9|SDH7|ATPQ|AT3G52730|FBA8|PUMP1|BIGYIN|AT3G62400|AT3G62790|NDB2|CYTC-2|AT4G16450|AT4G20150|AT4G00585|AT4G02580|AT4G26210|AT4G29480|AT4G30010|CIB22…	-43.6991	8	3	0	0	0	-60.337	13.7271	0.526472
1	1	1	0	0	1	0	1	1	-3.75314	-34.082	-46.5042	0	0	-37.4883	0	-4.60786	-35.6571	GO:0044429	M111001011	6	0.526472	GO Cellular Components	20	mitochondrial part		-48.5376	4.70666	19.5597	18896	392	1229	120	9.76404	0.846698	814736|814780|815343|816248|816555|816575|816723|817319|817502|817707|817884|818673|818821|818879|819042|819070|819247|819261|819351|819382|819567|819778|819805|819982|820005|820008|820256|820406|820547|820914|821078|821084|821088|821104|821133|821211|821370|821799|823668|823793|823809|823938|824395|824439|824459|824578|824876|825044|825413|825454|825844|826595|827343|827761|828026|828130|828316|…	AT2G02050|AT2G02510|AT2G07671|NTRA|AT2G20360|PHB6|MGP1|AT2G27730|TIM10|AT2G31490|AT2G33220|AT2G40765|OEP16-3|CSY3|ATCS|MTACP-1|SDH8|SDH4|AT2G47380|AT2G47690|GAPC1|PRXIIF|AT3G06310|AT3G07910|AAC1|AT3G08610|AT3G10860|AT3G12260|DIN4|VDAC1|AT3G01790|MPPBETA|AT3G01740|AT3G03100|AT3G03070|RPS2|AT3G18410|RPS10|IVD|AT3G46430|TIM9|SDH7|ATPQ|AT3G52730|FBA8|PUMP1|BIGYIN|CSY2|AT3G62400|AT3G62790|NDB2|CYTC-2|…	-45.5936	8	3	1	1	0	-60.337	13.7271	0.526472
1	1	1	0	0	1	0	1	1	-5.30002	-30.8294	-33.9428	0	0	-35.7282	0	-4.14167	-40.929	GO:0005743	M111001011	6	0.514823	GO Cellular Components	20	mitochondrial inner membrane		-41.1066	6.89835	19.8059	18896	207	966	73	7.55694	0.850397	814736|814780|815343|816555|816575|816723|817319|817707|817884|818673|818821|819247|819261|819351|819382|819805|820008|820256|820406|821084|821104|821133|821370|823793|823938|824395|824439|824578|825413|825454|825844|827343|827761|828130|828727|829069|829124|829622|829939|830353|830752|830768|830770|831049|831186|831252|831638|831998|832838|833729|834065|834094|834749|834807|834840|835361|836081|…	AT2G02050|AT2G02510|AT2G07671|AT2G20360|PHB6|MGP1|AT2G27730|AT2G31490|AT2G33220|AT2G40765|OEP16-3|SDH8|SDH4|AT2G47380|AT2G47690|AT3G06310|AT3G08610|AT3G10860|AT3G12260|MPPBETA|AT3G03100|AT3G03070|AT3G18410|AT3G46430|SDH7|ATPQ|AT3G52730|PUMP1|AT3G62400|AT3G62790|NDB2|AT4G16450|AT4G20150|AT4G02580|AT4G26210|AT4G29480|AT4G30010|CIB22|AT4G37830|AT5G04750|CI51|AT5G08670|AT5G08690|AT5G11770|ATP5|PHT3;1…	-38.8721	9	3	0	0	0	-60.337	13.7271	0.526472
1	1	1	0	1	1	0	1	1	-14.4848	-27.8785	-22.6048	0	-2.31435	-30.4317	0	-3.09213	-38.0058	GO:1990204	M111011011	7	0.484427	GO Cellular Components	20	oxidoreductase complex		-43.3983	8.86581	21.6043	18896	139	966	63	6.52174	0.794417	814736|814780|816555|816575|817319|817707|817884|818673|818821|819247|819261|819382|819805|820008|820256|820406|820547|820606|821084|821104|821133|821370|821937|822359|823793|823938|824439|824707|825454|827343|827761|828130|829622|830353|830752|830768|830770|831049|831998|833729|834065|834807|834840|835361|835598|836081|836783|836809|836895|837369|838007|838075|838239|839031|839465|841147|841337|…	AT2G02050|AT2G02510|AT2G20360|PHB6|AT2G27730|AT2G31490|AT2G33220|AT2G40765|OEP16-3|SDH8|SDH4|AT2G47690|AT3G06310|AT3G08610|AT3G10860|AT3G12260|DIN4|AT3G13930|MPPBETA|AT3G03100|AT3G03070|AT3G18410|RNR2A|SDH2-1|AT3G46430|SDH7|AT3G52730|AT3G55410|AT3G62790|AT4G16450|AT4G20150|AT4G02580|CIB22|AT5G04750|CI51|AT5G08670|AT5G08690|AT5G11770|AT5G18800|EMB1467|SDH2-2|AT5G47570|AT5G47890|AT5G52840|AT5G55070…	-40.9947	9	3	0	0	0	-60.337	13.7271	0.526472
1	1	1	0	0	1	0	1	1	-8.28292	-32.4413	-30.2563	0	0	-40.7954	0	-5.16882	-43.9681	GO:0070469	M111001011	6	0.514133	GO Cellular Components	20	respiratory chain		-50.5894	11.6204	24.8401	18896	101	966	60	6.21118	0.776558	814736|814780|816555|816575|817319|817707|817884|818673|818821|819247|819261|819351|819382|819805|820008|820256|820406|821084|821104|821133|821370|822359|823793|823938|824439|825413|825454|827343|827761|828130|829622|829939|830353|830752|830768|830770|831049|831998|832838|833729|834065|834807|834840|835361|836081|836783|836809|836895|837369|838007|838075|838239|839465|841147|841337|841627|843056|…	AT2G02050|AT2G02510|AT2G20360|PHB6|AT2G27730|AT2G31490|AT2G33220|AT2G40765|OEP16-3|SDH8|SDH4|AT2G47380|AT2G47690|AT3G06310|AT3G08610|AT3G10860|AT3G12260|MPPBETA|AT3G03100|AT3G03070|AT3G18410|SDH2-1|AT3G46430|SDH7|AT3G52730|AT3G62400|AT3G62790|AT4G16450|AT4G20150|AT4G02580|CIB22|AT4G37830|AT5G04750|CI51|AT5G08670|AT5G08690|AT5G11770|AT5G18800|AT5G27760|EMB1467|SDH2-2|AT5G47570|AT5G47890|AT5G52840|…	-47.2614	9	3	0	0	0	-60.337	13.7271	0.526472
1	1	1	0	0	1	0	0	1	-8.92835	-9.81974	-2.40098	0	0	-7.67839	0	0	-5.62809	GO:0043094	M111001001	5	0.445241	GO Biological Processes	19	cellular metabolic compound salvage	19_GO:0008152 metabolic process	-11.0657	5.55438	9.53436	18896	81	966	23	2.38095	0.490517	814736|816808|817319|817707|817884|819382|820140|821370|824578|827122|827343|829622|829949|830292|833729|834407|835361|835466|836783|838007|839465|841337|843056	AT2G02050|PMDH1|AT2G27730|AT2G31490|AT2G33220|AT2G47690|ADK1|AT3G18410|PUMP1|ATARD2|AT4G16450|CIB22|SHM1|GLU1|EMB1467|ARD4|AT5G52840|AT5G53850|GAMMA CA3|AT1G14450|MEE4|AT1G49140|AT1G67350	-9.96408	9	3	0	0	0	-60.337	13.7271	0.526472
1	1	1	0	0	1	0	1	1	-10.7174	-30.2628	-29.1953	0	0	-28.3047	0	-3.09072	-31.4434	GO:0019866	M111001011	6	0.475712	GO Cellular Components	20	organelle inner membrane		-32.7353	3.48623	14.7357	18896	270	2148	107	4.98138	0.46942	814638|814736|814780|815343|816555|816575|816623|816723|817319|817456|817707|817884|818317|818673|818821|818832|819060|819247|819261|819351|819382|819396|819805|819982|820008|820256|820406|821084|821104|821133|821370|823622|823793|823906|823938|824395|824439|824578|824861|824948|825360|825413|825454|825516|825797|825844|826702|827343|827761|828026|828130|828727|829069|829124|829306|829622|829939|…	AT2G01090|AT2G02050|AT2G02510|AT2G07671|AT2G20360|PHB6|PSB29|MGP1|AT2G27730|ftsh3|AT2G31490|AT2G33220|TIM17-2|AT2G40765|OEP16-3|AT2G42310|AT2G44525|SDH8|SDH4|AT2G47380|AT2G47690|Tic20-II|AT3G06310|AT3G07910|AT3G08610|AT3G10860|AT3G12260|MPPBETA|AT3G03100|AT3G03070|AT3G18410|ACD1|AT3G46430|MDH|SDH7|ATPQ|AT3G52730|PUMP1|CRD1|AT3G57785|AT3G61870|AT3G62400|AT3G62790|APG1|ATPC1|NDB2|NDPK3|AT4G16450|AT…	-30.8757	5	3	0	0	0	-60.337	13.7271	0.526472
1	1	1	1	0	1	0	1	1	-13.1921	-31.8097	-10.5079	-14.4269	0	-15.8161	0	-13.4092	-23.2718	ath00190	M111101011	7	0.360577	KEGG Pathway	24	Oxidative phosphorylation		-49.5856	9.37302	23.4105	18896	144	966	69	7.14286	0.828619	814736|815343|815374|815400|816413|816555|817101|817884|819070|819382|819805|820003|820008|820406|821104|821133|821370|822359|824395|824439|825042|825454|826716|828130|828471|828727|829069|829142|829388|829622|829939|830047|830752|830768|830770|831049|831186|831998|833729|834065|834749|834840|835361|836809|836895|838075|838138|838239|839465|841337|841590|842836|843898|843934|844228|844242|844705|…	AT2G02050|AT2G07671|AT2G07698|AT2G07727|HA1|AT2G20360|AT2G25610|AT2G33220|MTACP-1|AT2G47690|AT3G06310|VHA-E2|AT3G08610|AT3G12260|AT3G03100|AT3G03070|AT3G18410|SDH2-1|ATPQ|AT3G52730|AT3G58730|AT3G62790|TUF|AT4G02580|VAG2|AT4G26210|AT4G29480|HA2|AT4G32530|CIB22|AT4G37830|VHA-C3|CI51|AT5G08670|AT5G08690|AT5G11770|ATP5|AT5G18800|EMB1467|SDH2-2|AT5G47030|AT5G47890|AT5G52840|SDH1-1|FRO1|AT1G15120|AVP1|…	-46.5129	9	3	0	0	0	-60.337	13.7271	0.526472
1	1	1	0	0	1	0	0	1	-7.79817	-11.1007	-3.17926	0	0	-8.61608	0	0	-6.81524	GO:0009853	M111001001	5	0.442537	GO Biological Processes	19	photorespiration	19_GO:0008152 metabolic process	-12.5634	8.07958	11.1584	18896	46	966	19	1.96687	0.446772	814736|816808|817319|817707|817884|819382|821370|824578|827343|829622|829949|830292|833729|835361|836783|838007|839465|841337|843056	AT2G02050|PMDH1|AT2G27730|AT2G31490|AT2G33220|AT2G47690|AT3G18410|PUMP1|AT4G16450|CIB22|SHM1|GLU1|EMB1467|AT5G52840|GAMMA CA3|AT1G14450|MEE4|AT1G49140|AT1G67350	-11.3599	9	3	0	0	0	-60.337	13.7271	0.526472
1	1	1	1	0	1	0	1	1	-13.1921	-31.8097	-10.5079	-14.4269	0	-15.8161	0	-13.4092	-23.2718	ko00190	M111101011	7	0.360577	KEGG Pathway	24	Oxidative phosphorylation		-49.5856	9.37302	23.4105	18896	144	966	69	7.14286	0.828619	814736|815343|815374|815400|816413|816555|817101|817884|819070|819382|819805|820003|820008|820406|821104|821133|821370|822359|824395|824439|825042|825454|826716|828130|828471|828727|829069|829142|829388|829622|829939|830047|830752|830768|830770|831049|831186|831998|833729|834065|834749|834840|835361|836809|836895|838075|838138|838239|839465|841337|841590|842836|843898|843934|844228|844242|844705|…	AT2G02050|AT2G07671|AT2G07698|AT2G07727|HA1|AT2G20360|AT2G25610|AT2G33220|MTACP-1|AT2G47690|AT3G06310|VHA-E2|AT3G08610|AT3G12260|AT3G03100|AT3G03070|AT3G18410|SDH2-1|ATPQ|AT3G52730|AT3G58730|AT3G62790|TUF|AT4G02580|VAG2|AT4G26210|AT4G29480|HA2|AT4G32530|CIB22|AT4G37830|VHA-C3|CI51|AT5G08670|AT5G08690|AT5G11770|ATP5|AT5G18800|EMB1467|SDH2-2|AT5G47030|AT5G47890|AT5G52840|SDH1-1|FRO1|AT1G15120|AVP1|…	-46.5129	9	3	0	0	0	-60.337	13.7271	0.526472
1	1	1	1	1	1	1	1	1	-20.2677	-43.1901	-28.4669	-2.2352	-2.49297	-20.3326	-3.4004	-6.09044	-31.7911	GO:0098796	M111111111	9	0.443819	GO Cellular Components	20	membrane protein complex		-60.337	3.6485	20.3774	18896	516	1897	189	9.9631	0.68766	814688|814736|814780|815055|815211|815343|815374|816502|816555|816575|816605|816666|816723|817101|817170|817319|817707|817884|818117|818240|818264|818532|818583|818594|818673|818821|818832|819114|819247|819261|819295|819382|819805|819982|820001|820003|820008|820132|820142|820256|820355|820406|820419|821084|821104|821130|821133|821370|822286|822359|823793|823935|823938|824246|824352|824395|824405|…	CRR3|AT2G02050|AT2G02510|LHCB2.2|VPS2.1|AT2G07671|AT2G07698|SNF7.2|AT2G20360|PHB6|AT2G20760|UFD1|MGP1|AT2G25610|GP ALPHA 1|AT2G27730|AT2G31490|AT2G33220|DAD2|AT2G36680|MEMB11|PnsL1|AT2G39960|CLC2|AT2G40765|OEP16-3|AT2G42310|SEC61 BETA|SDH8|SDH4|PSI-P|AT2G47690|AT3G06310|AT3G07910|AT3G08530|VHA-E2|AT3G08610|SYP71|CDC48|AT3G10860|SYP121|AT3G12260|ELC|MPPBETA|AT3G03100|VMA10|AT3G03070|AT3G18410|CCL|…	-56.5371	6	3	0	0	1	-60.337	13.7271	0.526472
1	1	1	0	0	1	0	0	1	-9.2185	-17.0558	-9.17037	0	0	-15.6257	0	0	-7.80041	GO:0005507	M111001001	5	0.469067	GO Molecular Functions	21	copper ion binding		-20.2505	3.49417	11.5734	18896	191	1897	67	3.53189	0.423801	815120|816561|816723|817319|817636|817637|817648|817940|818226|819353|819567|820005|820140|820263|820606|820770|823720|824395|824459|824631|825030|825317|825414|825494|826595|826838|826987|827028|827276|827773|828613|828805|829490|830336|830635|830726|830768|830769|830770|831193|831638|831928|831935|832075|832195|834430|834509|835613|837405|837606|837904|838063|838079|838544|838889|839053|839295|…	ACO3|AT2G20420|MGP1|AT2G27730|GSTF9|GSTF10|ASP1|CUTA|LOS2|CP12-1|GAPC1|AAC1|ADK1|MSD1|AT3G13930|COX17|AT3G45770|ATPQ|FBA8|GR|AT3G58610|CYSC1|CP12-2|RRF|CYTC-2|AT4G12290|SAM-2|HOG1|AT4G15940|PCAP1|FSD1|ACO2|PAA1|SIR|GDH2|AT5G08300|AT5G08670|AT5G08680|AT5G08690|AAC2|EMB1241|CSD3|GDH1|ASP2|CPN20|CAD1|RAN1|MGE1|CSD1|ARFA1F|GAPC2|CPN10|AT1G15140|DHAR1|CYTC-1|AT1G24360|GSTF7|GSTF6|ACT8|mMDH1|LOS1|AT1G5…	-18.554	6	4	1	1	1	-20.2505	3.49417	0.469067
1	1	1	0	1	1	0	1	1	-2.26673	-2.05769	-5.01817	0	-5.04097	-3.91641	0	-2.83174	-6.11612	GO:0050897	M111011011	7	0.305117	GO Molecular Functions	21	cobalt ion binding		-12.6777	7.67101	11.0726	18896	51	966	20	2.07039	0.458136	816723|821104|821784|824707|829661|829949|830635|830768|830953|831186|831935|832378|836809|836895|838652|839031|839295|839515|842836|844314	MGP1|AT3G03100|POP2|AT3G55410|CAT2|SHM1|GDH2|AT5G08670|CBSX3|ATP5|GDH1|NCLPP7|SDH1-1|FRO1|CAT1|IAR4|GSTF7|GSTF6|mtACP2|NADP-ME4	-11.461	9	5	1	1	1	-12.6777	7.67101	0.305117
0	1	1	0	1	1	0	0	0	0	-10.3153	-34.4424	0	-4.32425	-30.9335	0	0	0	GO:0005730	M011011000	4	0.641779	GO Cellular Components	20	nucleolus		-21.6012	2.48524	11.2091	18896	497	1897	124	6.53664	0.567498	815006|815374|816016|816366|816569|816723|817252|817319|817576|817612|817876|818531|818549|818636|818985|819018|819095|819172|819231|819377|819870|819897|820005|820142|820213|820521|820605|820937|820951|821062|821084|821338|821343|821942|821994|822041|822138|823531|823741|824105|824162|824395|824459|824468|824818|824882|825129|825207|825427|826569|826873|826987|827083|827257|827529|828136|828163|…	NRPB6B|AT2G07698|AT2G15270|emb2444|NOP10|MGP1|SE|AT2G27730|U2B''|AT2G30620|PKT3|RPL23AA|BIK1|AT2G40430|LSM6B|AT2G44120|AT2G44860|SAP18|AT2G46230|AT2G47640|MFP2|AT3G07110|AAC1|CDC48|NAC052|AT3G13230|EIF4A1|AT3G16840|LPD1|AT3G03920|MPPBETA|RACK1C_AT|MOS4|AT3G23620|AT3G24080|MBF1C|ATL5|J3|HTB9|SR34a|CKA2|ATPQ|FBA8|STV1|AT3G56510|NAP57|NRPB8B|EDA14|AT3G62530|RPS18C|AT4G12600|SAM-2|AT4G14385|AT4G15770…	-19.8839	6	6	1	1	1	-21.6012	2.48524	0.641779
1	0	0	0	0	0	0	0	0	-3.38521	0	0	0	0	0	0	0	0	GO:0006534	M100000000	1	0.186223	GO Biological Processes	19	cysteine metabolic process	19_GO:0008152 metabolic process	-4.19943	3.77831	5.00176	18896	29	1897	11	0.579863	0.174328	818978|820499|821292|825317|825376|827028|827145|835778|841263|842043|844264	OASB|SERAT2;2|MTO1|CYSC1|ROC4|HOG1|OASA1|SERAT1;1|D-CDES|SERAT2;1|MST1	-3.69127	6	7	0	0	0	-11.3275	3.77831	0.451286
1	0	0	0	0	0	0	1	1	-2.55668	0	0	0	0	0	0	-2.0781	-2.13011	GO:0000097	M100000011	3	0.204959	GO Biological Processes	19	sulfur amino acid biosynthetic process	19_GO:0008152 metabolic process	-3.14442	2.77801	3.92904	18896	38	2148	12	0.558659	0.16082	818978|820499|821292|825317|825376|827122|827145|830035|834407|835466|835778|842043	OASB|SERAT2;2|MTO1|CYSC1|ROC4|ATARD2|OASA1|MTN1|ARD4|AT5G53850|SERAT1;1|SERAT2;1	-2.788	5	7	0	0	0	-11.3275	3.77831	0.451286
1	0	0	0	0	0	0	0	0	-4.63395	0	0	0	0	0	0	0	0	GO:1901607	M100000000	1	0.255675	GO Biological Processes	19	alpha-amino acid biosynthetic process	19_GO:0008152 metabolic process	-4.579	2.01397	4.60442	18896	183	1897	37	1.95045	0.317509	817170|817738|818911|818978|820499|821292|822396|823601|824015|824130|824484|825030|825317|825376|826975|827122|827145|827149|829277|829568|829949|830292|831169|833535|834407|834660|835427|835466|835571|835778|837082|838046|838352|838940|842043|842935|843869	GP ALPHA 1|AT2G31810|AT2G43090|OASB|SERAT2;2|MTO1|CARA|ADT4|CSR1|BCAT3|NodGS|AT3G58610|CYSC1|ROC4|IIL1|ATARD2|OASA1|HISN5B|CYP83B1|EDA9|SHM1|GLU1|AK-LYS1|GS2|ARD4|DELTA-OAT|GLT1|AT5G53850|TSB1|SERAT1;1|ACS2|AT1G14810|PGDH|GGT1|SERAT2;1|GSR2|OTC	-4.02026	6	7	0	0	0	-11.3275	3.77831	0.451286
1	0	0	0	0	0	0	0	0	-5.18566	0	0	0	0	0	0	0	0	GO:0009069	M100000000	1	0.282169	GO Biological Processes	19	serine family amino acid metabolic process	19_GO:0008152 metabolic process	-4.72109	2.93931	5.06786	18896	61	1897	18	0.948867	0.222586	818978|820499|821292|825317|825376|827028|827145|829438|829568|829949|831169|835778|837733|838352|838940|841263|842043|844264	OASB|SERAT2;2|MTO1|CYSC1|ROC4|HOG1|OASA1|GLDP1|EDA9|SHM1|AK-LYS1|SERAT1;1|AT1G11860|PGDH|GGT1|D-CDES|SERAT2;1|MST1	-4.14301	6	7	0	0	0	-11.3275	3.77831	0.451286
1	0	0	0	0	0	0	0	0	-2.21047	0	0	0	0	0	0	0	0	GO:0009070	M100000000	1	0.10538	GO Biological Processes	19	serine family amino acid biosynthetic process	19_GO:0008152 metabolic process	-3.09585	2.77981	3.90313	18896	43	1897	12	0.632578	0.182031	818978|820499|825317|825376|827145|829568|829949|831169|835778|838352|838940|842043	OASB|SERAT2;2|CYSC1|ROC4|OASA1|EDA9|SHM1|AK-LYS1|SERAT1;1|PGDH|GGT1|SERAT2;1	-2.74624	6	7	0	0	0	-11.3275	3.77831	0.451286
1	1	0	0	0	0	0	0	0	-6.46086	-3.32687	0	0	0	0	0	0	0	GO:0008652	M110000000	2	0.381549	GO Biological Processes	19	cellular amino acid biosynthetic process	19_GO:0008152 metabolic process	-6.65265	2.21903	5.81883	18896	202	1897	45	2.37217	0.349402	817170|817738|818115|818302|818911|818978|820499|821049|821292|821584|822306|822396|823601|824015|824130|824484|825030|825317|825376|826975|827122|827145|827149|829277|829489|829568|829949|830292|831169|833535|834407|834660|835427|835466|835571|835778|837082|838046|838352|838847|838940|841307|842043|842935|843869	GP ALPHA 1|AT2G31810|SKL2|ADK|AT2G43090|OASB|SERAT2;2|PYD1|MTO1|AT3G20390|SKL1|CARA|ADT4|CSR1|BCAT3|NodGS|AT3G58610|CYSC1|ROC4|IIL1|ATARD2|OASA1|HISN5B|CYP83B1|DHS2|EDA9|SHM1|GLU1|AK-LYS1|GS2|ARD4|DELTA-OAT|GLT1|AT5G53850|TSB1|SERAT1;1|ACS2|AT1G14810|PGDH|AT1G22410|GGT1|EMB1144|SERAT2;1|GSR2|OTC	-5.87699	6	7	0	0	0	-11.3275	3.77831	0.451286
1	1	1	0	1	0	0	0	1	-6.755	-4.74799	-2.01983	0	-4.61111	0	0	0	-2.01625	GO:1901605	M111010001	5	0.391127	GO Biological Processes	19	alpha-amino acid metabolic process	19_GO:0008152 metabolic process	-11.3275	2.3496	7.88472	18896	301	1897	71	3.74275	0.435791	814770|816149|817170|817648|817738|818280|818588|818911|818978|820499|821072|821292|821784|822396|822833|823601|823668|824015|824130|824484|824493|825030|825317|825376|826975|827028|827122|827145|827149|827786|828798|829277|829438|829452|829568|829623|829949|830292|830635|831024|831126|831169|831935|832075|833535|834407|834660|835086|835263|835427|835466|835480|835494|835571|835598|835778|836724|…	GSTZ1|ADC1|GP ALPHA 1|ASP1|AT2G31810|PAL1|HSPRO2|AT2G43090|OASB|SERAT2;2|GDH3|MTO1|POP2|CARA|ERD5|ADT4|IVD|CSR1|BCAT3|NodGS|PAL2|AT3G58610|CYSC1|ROC4|IIL1|HOG1|ATARD2|OASA1|HISN5B|LSD1|AT4G26910|CYP83B1|GLDP1|AT4G33150|EDA9|ADC2|SHM1|GLU1|GDH2|ASP3|DiT1|AK-LYS1|GDH1|ASP2|GS2|ARD4|DELTA-OAT|QS|AT5G51880|GLT1|AT5G53850|TAT7|HGO|TSB1|AT5G55070|SERAT1;1|CHY1|ACS2|PDS1|AT1G11860|AT1G14810|PGDH|GGT1|MY…	-10.2037	6	7	0	0	1	-11.3275	3.77831	0.451286
1	1	1	0	1	0	0	0	0	-9.43159	-4.38569	-3.76591	0	-5.77584	0	0	0	0	GO:0006520	M111010000	4	0.451286	GO Biological Processes	19	cellular amino acid metabolic process	19_GO:0008152 metabolic process	-10.4926	2.05767	7.37593	18896	426	1897	88	4.6389	0.482903	814770|816149|817022|817170|817648|817738|818115|818280|818302|818588|818911|818978|820499|820547|821049|821072|821292|821584|821784|822306|822396|822833|823601|823668|824015|824130|824484|824493|825030|825317|825376|825385|826975|827028|827122|827145|827149|827786|828798|829246|829277|829438|829452|829489|829568|829623|829949|830292|830635|831024|831126|831169|831935|832075|833535|833874|834407|…	GSTZ1|ADC1|TAT3|GP ALPHA 1|ASP1|AT2G31810|SKL2|PAL1|ADK|HSPRO2|AT2G43090|OASB|SERAT2;2|DIN4|PYD1|GDH3|MTO1|AT3G20390|POP2|SKL1|CARA|ERD5|ADT4|IVD|CSR1|BCAT3|NodGS|PAL2|AT3G58610|CYSC1|ROC4|AT3G62120|IIL1|HOG1|ATARD2|OASA1|HISN5B|LSD1|AT4G26910|AT4G31180|CYP83B1|GLDP1|AT4G33150|DHS2|EDA9|ADC2|SHM1|GLU1|GDH2|ASP3|DiT1|AK-LYS1|GDH1|ASP2|GS2|AT5G38830|ARD4|DELTA-OAT|bZIP1|QS|AT5G51880|GLT1|AT5G53850|…	-9.42563	6	7	1	1	0	-11.3275	3.77831	0.451286
1	0	0	0	0	0	0	0	0	-2.56261	0	0	0	0	0	0	0	0	GO:0000096	M100000000	1	0.1315	GO Biological Processes	19	sulfur amino acid metabolic process	19_GO:0008152 metabolic process	-2.85819	2.33461	3.57265	18896	64	1897	15	0.790722	0.203355	818978|820499|821292|825317|825376|827028|827122|827145|829568|834407|835466|835778|841263|842043|844264	OASB|SERAT2;2|MTO1|CYSC1|ROC4|HOG1|ATARD2|OASA1|EDA9|ARD4|AT5G53850|SERAT1;1|D-CDES|SERAT2;1|MST1	-2.54925	6	7	0	0	0	-11.3275	3.77831	0.451286
1	1	0	1	0	0	0	1	0	-5.2574	-8.28935	0	-7.4365	0	0	0	-2.56833	0	ath_M00157	M110100010	4	0.455706	KEGG Structural Complexes	25	F-type ATPase, prokaryotes and chloroplasts		-7.07839	8.85421	7.87296	18896	9	1897	8	0.421719	0.148785	826551|829359|844757|844758|844787|844788|844789|844790	ATPD|PDE334|atpB|atpE|atpI|atpH|atpF|atpA	-6.26761	6	8	0	0	0	-19.8652	8.85421	0.612897
1	1	0	1	0	0	0	1	0	-31.8527	-24.3986	0	-14.9392	0	0	0	-5.88654	0	ko00195	M110100010	4	0.612897	KEGG Pathway	24	Photosynthesis		-19.8652	4.86151	12.0799	18896	76	2148	42	1.95531	0.298746	817297|817606|824246|824699|825797|825887|826551|826892|827146|827996|828984|829359|836525|836751|837358|837639|838591|841033|841653|842016|842386|844245|844728|844729|844730|844733|844745|844748|844750|844757|844758|844768|844770|844773|844774|844775|844787|844788|844789|844790|844795|844802	FD3|PSBW|PSBO2|PPL1|ATPC1|RFNR1|ATPD|PSAL|FdC1|PETC|PSB28|PDE334|PSAN|FNR1|PSAO|FD1|FNR2|NPQ4|PSAH2|PSAG|FED A|PSBR|petD|petB|psbH|psbB|psbE|petA|psaC|atpB|atpE|psaA|psaB|psbC|psbZ|psbD|atpI|atpH|atpF|atpA|psbK|psbA	-18.1905	5	8	0	0	0	-19.8652	8.85421	0.612897
1	1	0	1	0	0	0	1	0	-31.8527	-24.3986	0	-14.9392	0	0	0	-5.88654	0	ath00195	M110100010	4	0.612897	KEGG Pathway	24	Photosynthesis		-19.8652	4.86151	12.0799	18896	76	2148	42	1.95531	0.298746	817297|817606|824246|824699|825797|825887|826551|826892|827146|827996|828984|829359|836525|836751|837358|837639|838591|841033|841653|842016|842386|844245|844728|844729|844730|844733|844745|844748|844750|844757|844758|844768|844770|844773|844774|844775|844787|844788|844789|844790|844795|844802	FD3|PSBW|PSBO2|PPL1|ATPC1|RFNR1|ATPD|PSAL|FdC1|PETC|PSB28|PDE334|PSAN|FNR1|PSAO|FD1|FNR2|NPQ4|PSAH2|PSAG|FED A|PSBR|petD|petB|psbH|psbB|psbE|petA|psaC|atpB|atpE|psaA|psaB|psbC|psbZ|psbD|atpI|atpH|atpF|atpA|psbK|psbA	-18.1905	5	8	1	1	1	-19.8652	8.85421	0.612897
1	1	0	1	0	0	0	1	0	-5.2574	-8.28935	0	-7.4365	0	0	0	-2.56833	0	M00157	M110100010	4	0.455706	KEGG Structural Complexes	25	F-type ATPase, prokaryotes and chloroplasts		-7.07839	8.85421	7.87296	18896	9	1897	8	0.421719	0.148785	826551|829359|844757|844758|844787|844788|844789|844790	ATPD|PDE334|atpB|atpE|atpI|atpH|atpF|atpA	-6.26761	6	8	0	0	0	-19.8652	8.85421	0.612897
1	1	0	0	0	0	1	0	0	-17.5233	-8.22409	0	0	0	0	-2.04319	0	0	GO:0009644	M110000100	3	0.590907	GO Biological Processes	19	response to high light intensity	19_GO:0050896 response to stimulus	-8.27532	3.26939	7.00783	18896	63	2477	27	1.09003	0.20863	815055|815111|816293|817646|818531|818741|820828|821411|823942|824246|824694|827119|827146|827463|829220|829567|831928|834232|835515|835809|836244|837071|837246|838314|839666|841995|844298	LHCB2.2|PGR5|ERD7|VAR2|RPL23AA|ERD15|FAD5|ACT2|CHL|PSBO2|RPL23AB|ELIP2|FdC1|ERF6|FAD6|SEP1|CSD3|VAR1|LHCB3|ABI2|ANK6|LEA14|SR45a|LOX3|STZ|ZKT|AT1G79600	-7.36815	4	9	1	1	0	-14.9915	3.26939	0.590907
1	1	0	0	1	0	1	0	1	-14.2022	-6.86806	0	0	-5.54852	0	-2.00618	0	-2.09892	GO:0009416	M110010101	5	0.515872	GO Biological Processes	19	response to light stimulus	19_GO:0050896 response to stimulus	-11.4318	1.66215	7.40397	18896	794	2477	173	6.98426	0.512124	814646|814805|815055|815111|815247|816282|816293|816650|816819|816837|817016|817170|817208|817212|817241|817569|817599|817646|817665|817694|817696|818116|818167|818226|818265|818280|818374|818531|818558|818709|818741|818982|819146|819242|819244|819296|819353|819383|819956|820213|820388|820547|820572|820828|821027|821048|821260|821339|821411|821519|821667|821781|822525|823492|823531|823942|824162|…	PAP1|UBC2|LHCB2.2|PGR5|XTH4|NIP2|ERD7|XCT|AT2G22880|AT2G23070|COL3|GP ALPHA 1|TED4|BAS1|FUS12|PBCP|C4H|VAR2|AT2G31090|ADS2|STH|SRO1|BLH1|LOS2|ABCB1|PAL1|SOUL-1|RPL23AA|RCA|TCH3|ERD15|MPK6|BEN1|SPA1|JAR1|CCA1|CP12-1|RFI2|COL9|NAC052|AT3G12130|DIN4|AT3G13670|FAD5|HYH|AT3G17800|TRXF1|LST8-1|ACT2|DWF1|BBX32|FHY3|MYB30|CAM7|J3|CHL|CKA2|PSBO2|RPL23AB|EIF3E|AGL18|PRN|POB1|ROC4|CP12-2|COP9|ELIP2|FdC1|ERF…	-10.3026	4	9	0	0	0	-14.9915	3.26939	0.590907
1	1	0	0	1	1	1	0	0	-19.6234	-13.6982	0	0	-2.52286	-2.45853	-5.46922	0	0	GO:0009642	M110011100	5	0.57239	GO Biological Processes	19	response to light intensity	19_GO:0050896 response to stimulus	-14.9915	3.04076	9.51456	18896	143	2477	57	2.30117	0.30127	815055|815111|815247|816293|817170|817646|818531|818709|818741|819146|820547|820828|821260|821411|823942|824246|824694|825091|825376|827119|827146|827463|827922|828053|828524|828613|829220|829541|829567|831501|831928|831935|832145|833755|834232|834300|834301|834652|835515|835809|836103|836244|836440|837071|837246|837405|837555|838314|838739|839529|839666|840069|840297|841995|842386|842760|844298	LHCB2.2|PGR5|XTH4|ERD7|GP ALPHA 1|VAR2|RPL23AA|TCH3|ERD15|BEN1|DIN4|FAD5|TRXF1|ACT2|CHL|PSBO2|RPL23AB|PRN|ROC4|ELIP2|FdC1|ERF6|AGY1|SAG21|ACBP3|FSD1|FAD6|OST1|SEP1|TRXF2|CSD3|GDH1|BCB|TCH2|VAR1|SCP2|COR27|APE2|LHCB3|ABI2|RHL41|ANK6|AT5G63190|LEA14|SR45a|CSD1|NFXL1|LOX3|AT1G21400|CRY2|STZ|ACBP6|OHP2|ZKT|FED A|RPN12a|AT1G79600	-13.5851	4	9	0	0	1	-14.9915	3.26939	0.590907
1	1	1	0	1	1	0	0	1	-15.3024	-7.62578	-5.00178	0	-6.57944	-4.726	0	0	-8.28114	ath01200	M111011001	6	0.414201	KEGG Pathway	24	Carbon metabolism		-26.2542	3.42171	13.1861	18896	262	1897	90	4.74433	0.488089	814643|815120|816218|816561|816652|816672|816808|816962|817648|818226|818231|818382|818860|818879|818978|819042|819364|819567|819865|820499|820606|820664|820951|821045|821072|821870|822139|822359|823906|824459|824465|824707|824746|825044|825317|827145|827226|828759|828798|828805|829438|829568|829661|829679|829949|830052|830635|830726|830825|831024|831039|831150|831183|831330|831935|832075|832511|…	PDE345|ACO3|IDH2|AT2G20420|TIM|FBA1|PMDH1|ALDH11A3|ASP1|LOS2|AT2G36580|CAC3|PPC2|CSY3|OASB|ATCS|FUM1|GAPC1|IBR3|SERAT2;2|AT3G13930|GOX2|LPD1|AT3G17770|GDH3|PKP-ALPHA|GLYR1|SDH2-1|MDH|FBA8|AT3G52990|AT3G55410|SBPASE|CSY2|CYSC1|OASA1|PPDK|FBA5|AT4G26910|ACO2|GLDP1|EDA9|CAT2|IDH1|SHM1|FBA2|GDH2|AT5G08300|PMDH2|ASP3|NADP-ME2|G6PD2|TRA2|FDH|GDH1|ASP2|EMB2024|CAC2|RBCS3B|SDH2-2|G6PD6|HOT5|PKP-BETA1|AT5…	-24.4826	6	10	1	1	1	-26.2542	3.42171	0.414201
1	1	1	0	1	1	0	0	1	-15.3024	-7.62578	-5.00178	0	-6.57944	-4.726	0	0	-8.28114	ko01200	M111011001	6	0.414201	KEGG Pathway	24	Carbon metabolism		-26.2542	3.42171	13.1861	18896	262	1897	90	4.74433	0.488089	814643|815120|816218|816561|816652|816672|816808|816962|817648|818226|818231|818382|818860|818879|818978|819042|819364|819567|819865|820499|820606|820664|820951|821045|821072|821870|822139|822359|823906|824459|824465|824707|824746|825044|825317|827145|827226|828759|828798|828805|829438|829568|829661|829679|829949|830052|830635|830726|830825|831024|831039|831150|831183|831330|831935|832075|832511|…	PDE345|ACO3|IDH2|AT2G20420|TIM|FBA1|PMDH1|ALDH11A3|ASP1|LOS2|AT2G36580|CAC3|PPC2|CSY3|OASB|ATCS|FUM1|GAPC1|IBR3|SERAT2;2|AT3G13930|GOX2|LPD1|AT3G17770|GDH3|PKP-ALPHA|GLYR1|SDH2-1|MDH|FBA8|AT3G52990|AT3G55410|SBPASE|CSY2|CYSC1|OASA1|PPDK|FBA5|AT4G26910|ACO2|GLDP1|EDA9|CAT2|IDH1|SHM1|FBA2|GDH2|AT5G08300|PMDH2|ASP3|NADP-ME2|G6PD2|TRA2|FDH|GDH1|ASP2|EMB2024|CAC2|RBCS3B|SDH2-2|G6PD6|HOT5|PKP-BETA1|AT5…	-24.4826	6	10	0	0	0	-26.2542	3.42171	0.414201
1	1	1	0	1	1	0	0	1	-6.82016	-4.78507	-4.53843	0	-2.67762	-2.27788	0	0	-2.47017	ath01230	M111011001	6	0.352223	KEGG Pathway	24	Biosynthesis of amino acids		-10.3933	2.4208	7.56979	18896	251	1897	61	3.2156	0.405042	814643|815120|816218|816652|816672|817022|817648|817738|818226|818231|818879|818911|818978|819042|819567|820499|821292|821870|823601|824015|824130|824459|824465|825030|825044|825317|826975|826987|827145|827149|828759|828805|829489|829568|829679|829949|830052|831024|831169|831183|832075|833535|835369|835427|835480|835571|835735|835778|836488|837776|837904|838046|838352|838847|838940|841307|841849|…	PDE345|ACO3|IDH2|TIM|FBA1|TAT3|ASP1|AT2G31810|LOS2|AT2G36580|CSY3|AT2G43090|OASB|ATCS|GAPC1|SERAT2;2|MTO1|PKP-ALPHA|ADT4|CSR1|BCAT3|FBA8|AT3G52990|AT3G58610|CSY2|CYSC1|IIL1|SAM-2|OASA1|HISN5B|FBA5|ACO2|DHS2|EDA9|IDH1|SHM1|FBA2|ASP3|AK-LYS1|TRA2|ASP2|GS2|PKP-BETA1|GLT1|TAT7|TSB1|AT5G56350|SERAT1;1|AT5G63680|AT1G12230|GAPC2|AT1G14810|PGDH|AT1G22410|GGT1|EMB1144|ALDH7B4|SERAT2;1|AT1G56190|cICDH|OTC	-9.33157	6	10	0	0	0	-26.2542	3.42171	0.414201
1	1	1	0	1	1	0	0	1	-6.82016	-4.78507	-4.53843	0	-2.67762	-2.27788	0	0	-2.47017	ko01230	M111011001	6	0.352223	KEGG Pathway	24	Biosynthesis of amino acids		-10.3933	2.4208	7.56979	18896	251	1897	61	3.2156	0.405042	814643|815120|816218|816652|816672|817022|817648|817738|818226|818231|818879|818911|818978|819042|819567|820499|821292|821870|823601|824015|824130|824459|824465|825030|825044|825317|826975|826987|827145|827149|828759|828805|829489|829568|829679|829949|830052|831024|831169|831183|832075|833535|835369|835427|835480|835571|835735|835778|836488|837776|837904|838046|838352|838847|838940|841307|841849|…	PDE345|ACO3|IDH2|TIM|FBA1|TAT3|ASP1|AT2G31810|LOS2|AT2G36580|CSY3|AT2G43090|OASB|ATCS|GAPC1|SERAT2;2|MTO1|PKP-ALPHA|ADT4|CSR1|BCAT3|FBA8|AT3G52990|AT3G58610|CSY2|CYSC1|IIL1|SAM-2|OASA1|HISN5B|FBA5|ACO2|DHS2|EDA9|IDH1|SHM1|FBA2|ASP3|AK-LYS1|TRA2|ASP2|GS2|PKP-BETA1|GLT1|TAT7|TSB1|AT5G56350|SERAT1;1|AT5G63680|AT1G12230|GAPC2|AT1G14810|PGDH|AT1G22410|GGT1|EMB1144|ALDH7B4|SERAT2;1|AT1G56190|cICDH|OTC	-9.33157	6	10	0	0	0	-26.2542	3.42171	0.414201
0	1	1	0	0	1	0	0	0	0	-7.50368	-3.69497	0	0	-3.92139	0	0	0	GO:0005198	M011001000	3	0.422651	GO Molecular Functions	21	structural molecule activity		-2.5231	1.36686	2.92791	18896	413	2477	74	2.98748	0.342061	816172|816196|816263|816605|817318|818011|818015|818234|818304|818531|818594|819095|819725|819777|819927|820001|820367|821078|821088|821211|821338|821411|821799|822138|822335|823623|823747|824351|824352|824468|824694|827074|827471|828167|828316|829298|829596|829701|829709|830147|830270|830837|830841|830900|831655|831853|832141|833138|834097|834154|834779|835549|837291|837298|837993|838245|838388|…	AT2G16710|AT2G16930|HMGB4|AT2G20760|AT2G27720|AT2G34480|RPS14|RPL24A|RPS5B|RPL23AA|CLC2|AT2G44860|RPL18|AT3G06040|AIR12|AT3G08530|RPS5A|AT3G01790|AT3G01740|RPS2|RACK1C_AT|ACT2|RPS10|ATL5|GHS1|RPL9|RPS15AD|HMGB1|AT3G51890|STV1|RPL23AB|AT4G14320|AT4G17560|RPS13A|ISU1|RPS6|AT4G34450|MRPL11|HMGB5|AT4G39880|AT5G03905|AT5G09770|ACT7|EMB3010|PSRP6|AT5G02610|AT5G20180|RPS1|RPL27|RPS10B|RPS19|RPL24|RPS15A…	-2.2676	4	11	0	0	0	-6.84112	1.86283	0.506595
0	1	0	0	0	1	0	0	0	0	-4.99378	0	0	0	-8.92015	0	0	0	GO:0044445	M010001000	2	0.463933	GO Cellular Components	20	cytosolic part		-4.7287	1.71644	4.54569	18896	354	1897	61	3.2156	0.405042	815135|816672|817059|817318|818226|818234|818304|818531|819018|819095|819897|820142|820367|820418|821233|821774|821937|822138|823747|824289|824395|824468|824694|824896|825376|826569|826716|827074|828167|829298|829661|829949|831231|831419|831431|831853|832669|833535|833828|833970|834154|834316|835598|835941|837291|837733|837993|838217|838388|838652|838938|839109|839395|840346|841284|841822|842098|…	PAA2|FBA1|AT2G25210|AT2G27720|LOS2|RPL24A|RPS5B|RPL23AA|AT2G44120|AT2G44860|AT3G07110|CDC48|RPS5A|AT3G12390|RGP1|PAC1|RNR2A|ATL5|RPS15AD|PAD1|ATPQ|STV1|RPL23AB|EIF3E|ROC4|RPS18C|TUF|AT4G14320|RPS13A|RPS6|CAT2|SHM1|NACA3|RGP2|AT5G15750|AT5G02610|TGG1|GS2|RBCS3B|RPL5B|RPS10B|RPT4A|AT5G55070|RPT3|RPS15A|AT1G11860|SAC52|PAB1|ATARCA|CAT1|RPL27AB|AT1G25260|KCS1|EMB3003|RACK1B_AT|PAE1|PBG1|RPL3B|GSR2|P4…	-4.14907	6	11	0	0	0	-6.84112	1.86283	0.506595
1	1	1	0	0	1	0	0	0	-2.63951	-6.85011	-2.62275	0	0	-2.94471	0	0	0	GO:0003735	M111001000	4	0.378213	GO Molecular Functions	21	structural constituent of ribosome		-2.03555	1.38218	2.53404	18896	287	2477	52	2.09931	0.28805	816196|817318|818011|818015|818234|818304|818531|819095|819725|819777|820367|821078|821088|821211|821799|822138|822335|823623|823747|824468|824694|827074|827471|828167|829298|829701|830147|830837|830900|831655|831853|832141|833138|834097|834154|834779|835549|837291|837298|837993|838245|838938|839876|842454|842759|842976|843189|843569|843836|844324|3768810|5007783	AT2G16930|AT2G27720|AT2G34480|RPS14|RPL24A|RPS5B|RPL23AA|AT2G44860|RPL18|AT3G06040|RPS5A|AT3G01790|AT3G01740|RPS2|RPS10|ATL5|GHS1|RPL9|RPS15AD|STV1|RPL23AB|AT4G14320|AT4G17560|RPS13A|RPS6|MRPL11|AT4G39880|AT5G09770|EMB3010|PSRP6|AT5G02610|AT5G20180|RPS1|RPL27|RPS10B|RPS19|RPL24|RPS15A|AT1G07830|SAC52|AT1G16740|RPL27AB|RPL18AA|RPL3B|AT1G64510|SAG24|PSRP3/1|P40|RPS9|RPS17|AT3G13882|AT1G47278	-1.85926	4	11	0	0	0	-6.84112	1.86283	0.506595
1	1	1	0	0	1	0	0	0	-3.93309	-10.8506	-2.3157	0	0	-9.43349	0	0	0	GO:0005840	M111001000	4	0.506595	GO Cellular Components	20	ribosome		-6.84112	1.86283	5.71398	18896	385	1897	72	3.79547	0.438729	815135|816672|817059|817318|818015|818234|818304|818531|819018|819095|819897|820142|820367|820418|821078|821088|821211|821233|821774|821799|822138|823747|824289|824395|824468|824694|825376|826569|826716|827074|828167|829027|829298|829661|829701|829949|830147|831231|831419|831431|831853|832669|833535|833828|833970|834154|834779|835549|835598|837291|837455|837627|837733|837993|838217|838367|838388|…	PAA2|FBA1|AT2G25210|AT2G27720|RPS14|RPL24A|RPS5B|RPL23AA|AT2G44120|AT2G44860|AT3G07110|CDC48|RPS5A|AT3G12390|AT3G01790|AT3G01740|RPS2|RGP1|PAC1|RPS10|ATL5|RPS15AD|PAD1|ATPQ|STV1|RPL23AB|ROC4|RPS18C|TUF|AT4G14320|RPS13A|emb2726|RPS6|CAT2|MRPL11|SHM1|AT4G39880|NACA3|RGP2|AT5G15750|AT5G02610|TGG1|GS2|RBCS3B|RPL5B|RPS10B|RPS19|RPL24|AT5G55070|RPS15A|CRB|TIF3H1|AT1G11860|SAC52|PAB1|BTF3|ATARCA|CAT1|RP…	-6.04996	6	11	1	1	1	-6.84112	1.86283	0.506595
1	1	0	0	0	1	0	0	0	-3.50317	-7.49698	0	0	0	-3.4441	0	0	0	ath03010	M110001000	3	0.417239	KEGG Pathway	24	Ribosome		-2.11555	1.35	2.58943	18896	356	2477	63	2.5434	0.316337	816196|817059|817318|818011|818015|818234|818304|818531|819018|819095|819725|819777|819853|819897|820367|821078|821211|821799|822138|823623|823747|824468|824694|826569|827074|827471|828167|829298|829701|830147|830837|830900|831853|832141|833138|833970|834097|834154|834779|835549|837291|837993|838245|838938|839876|842454|842759|842976|843569|843836|844324|844704|844718|844719|844721|844722|844723|…	AT2G16930|AT2G25210|AT2G27720|AT2G34480|RPS14|RPL24A|RPS5B|RPL23AA|AT2G44120|AT2G44860|RPL18|AT3G06040|AT3G06680|AT3G07110|RPS5A|AT3G01790|RPS2|RPS10|ATL5|RPL9|RPS15AD|STV1|RPL23AB|RPS18C|AT4G14320|AT4G17560|RPS13A|RPS6|MRPL11|AT4G39880|AT5G09770|EMB3010|AT5G02610|AT5G20180|RPS1|RPL5B|RPL27|RPS10B|RPS19|RPL24|RPS15A|SAC52|AT1G16740|RPL27AB|RPL18AA|RPL3B|AT1G64510|SAG24|P40|RPS9|RPS17|rpl32|rpl2|r…	-1.92631	4	11	0	0	0	-6.84112	1.86283	0.506595
0	1	0	0	0	1	0	0	0	0	-6.05516	0	0	0	-8.76975	0	0	0	GO:0022626	M010001000	2	0.470863	GO Cellular Components	20	cytosolic ribosome		-4.79039	1.77084	4.60874	18896	315	1897	56	2.95203	0.388615	815135|816672|817059|817318|818234|818304|818531|819018|819095|819897|820142|820367|820418|821233|821774|822138|823747|824289|824395|824468|824694|825376|826569|826716|827074|828167|829298|829661|829949|831231|831419|831431|831853|832669|833535|833828|833970|834154|835598|837291|837733|837993|838217|838388|838652|838938|839109|839395|840346|841284|841822|842098|842454|842935|843569|3769408	PAA2|FBA1|AT2G25210|AT2G27720|RPL24A|RPS5B|RPL23AA|AT2G44120|AT2G44860|AT3G07110|CDC48|RPS5A|AT3G12390|RGP1|PAC1|ATL5|RPS15AD|PAD1|ATPQ|STV1|RPL23AB|ROC4|RPS18C|TUF|AT4G14320|RPS13A|RPS6|CAT2|SHM1|NACA3|RGP2|AT5G15750|AT5G02610|TGG1|GS2|RBCS3B|RPL5B|RPS10B|AT5G55070|RPS15A|AT1G11860|SAC52|PAB1|ATARCA|CAT1|RPL27AB|AT1G25260|KCS1|EMB3003|RACK1B_AT|PAE1|PBG1|RPL3B|GSR2|P40|AT3G41768	-4.20389	6	11	0	0	0	-6.84112	1.86283	0.506595
1	1	0	0	0	1	0	0	0	-3.50317	-7.49698	0	0	0	-3.4441	0	0	0	ko03010	M110001000	3	0.417239	KEGG Pathway	24	Ribosome		-2.11555	1.35	2.58943	18896	356	2477	63	2.5434	0.316337	816196|817059|817318|818011|818015|818234|818304|818531|819018|819095|819725|819777|819853|819897|820367|821078|821211|821799|822138|823623|823747|824468|824694|826569|827074|827471|828167|829298|829701|830147|830837|830900|831853|832141|833138|833970|834097|834154|834779|835549|837291|837993|838245|838938|839876|842454|842759|842976|843569|843836|844324|844704|844718|844719|844721|844722|844723|…	AT2G16930|AT2G25210|AT2G27720|AT2G34480|RPS14|RPL24A|RPS5B|RPL23AA|AT2G44120|AT2G44860|RPL18|AT3G06040|AT3G06680|AT3G07110|RPS5A|AT3G01790|RPS2|RPS10|ATL5|RPL9|RPS15AD|STV1|RPL23AB|RPS18C|AT4G14320|AT4G17560|RPS13A|RPS6|MRPL11|AT4G39880|AT5G09770|EMB3010|AT5G02610|AT5G20180|RPS1|RPL5B|RPL27|RPS10B|RPS19|RPL24|RPS15A|SAC52|AT1G16740|RPL27AB|RPL18AA|RPL3B|AT1G64510|SAG24|P40|RPS9|RPS17|rpl32|rpl2|r…	-1.92631	4	11	0	0	0	-6.84112	1.86283	0.506595
1	1	0	0	0	1	0	0	0	-14.1585	-7.00536	0	0	0	-2.32547	0	0	0	GO:0048046	M110001000	3	0.552373	GO Cellular Components	20	apoplast		-6.97364	1.844	5.74275	18896	302	2477	73	2.94711	0.339813	816055|816652|816672|817244|817636|817637|818226|818343|818558|818860|818978|819567|820140|820496|820664|821451|821834|823556|823906|824060|824454|824459|824746|825030|825162|825376|826515|827145|827260|827831|827931|829438|829949|830029|830052|830292|830336|830724|830825|830851|831039|832071|832174|832185|832195|832669|833535|833828|835257|835945|836262|836476|836751|836785|837095|837341|837455|…	NIR1|TIM|FBA1|PAG1|GSTF9|GSTF10|LOS2|AT2G37660|RCA|PPC2|OASB|GAPC1|ADK1|ABCC3|GOX2|PREP1|PBD1|NIT1|MDH|AAE3|MDAR1|FBA8|SBPASE|AT3G58610|GDI2|ROC4|NDPK1|OASA1|RALFL33|AT4G20830|GSTF2|GLDP1|SHM1|ROC1|FBA2|GLU1|SIR|HEMC|PMDH2|AT5G02240|NADP-ME2|AT5G19510|WAV2|GER3|CPN20|TGG1|GS2|RBCS3B|PGM|AT5G58330|RPE|GSA1|FNR1|AT5G66530|POM1|AXS2|CRB|AT1G11860|GAPA-2|DHAR1|FNR2|GGT1|THM1|PRK|RD21A|cICDH|GSR2|HPR|…	-6.17175	4	12	1	1	1	-6.97364	1.844	0.552373
1	0	0	0	0	0	0	0	0	-8.50591	0	0	0	0	0	0	0	0	GO:0010196	M100000000	1	0.404214	GO Biological Processes	19	nonphotochemical quenching	19_GO:0050896 response to stimulus	-2.05698	3.05143	3.08712	18896	15	2477	6	0.242229	0.0987695	818741|827996|830699|838151|841033|842103	ERD15|PETC|AT5G08050|LHCB6|NPQ4|AT1G56500	-1.87817	4	13	1	1	1	-2.05698	3.05143	0.404214
1	0	0	0	0	0	0	0	0	-8.50591	0	0	0	0	0	0	0	0	GO:1990066	M100000000	1	0.404214	GO Biological Processes	19	energy quenching	19_GO:0050896 response to stimulus	-2.05698	3.05143	3.08712	18896	15	2477	6	0.242229	0.0987695	818741|827996|830699|838151|841033|842103	ERD15|PETC|AT5G08050|LHCB6|NPQ4|AT1G56500	-1.87817	4	13	0	0	0	-2.05698	3.05143	0.404214
0	0	0	0	0	0	1	0	0	0	0	0	0	0	0	-2.78804	0	0	GO:2000377	M000000100	1	0.147327	GO Biological Processes	19	regulation of reactive oxygen species metabolic process	19_GO:0050789 regulation of biological process	-3.16842	2.38563	3.81749	18896	59	2148	16	0.744879	0.185525	815055|816623|816847|817901|819244|819419|826838|827786|829541|829826|832195|833755|837555|839529|840115|841883	LHCB2.2|PSB29|NRAMP3|RD20|JAR1|RPH1|AT4G12290|LSD1|OST1|GBF1|CPN20|TCH2|NFXL1|CRY2|RCD1|AT1G54410	-2.80818	5	14	0	0	0	-7.62131	2.72371	0.33261
1	1	0	0	0	0	0	0	1	-5.05794	-2.41203	0	0	0	0	0	0	-2.73094	GO:0072593	M110000001	3	0.33261	GO Biological Processes	19	reactive oxygen species metabolic process	19_GO:0008152 metabolic process	-7.62131	2.72371	6.53665	18896	128	1897	35	1.84502	0.308975	815055|816248|816623|817170|817646|817901|819244|819778|820263|820664|822402|824454|826838|827786|828613|829541|829652|829661|829826|831928|832195|833755|834842|836372|837304|837405|837555|838652|839529|840115|840630|841883|843389|844112|844282	LHCB2.2|NTRA|PSB29|GP ALPHA 1|VAR2|RD20|JAR1|PRXIIF|MSD1|GOX2|MDAR4|MDAR1|AT4G12290|LSD1|FSD1|OST1|APX3|CAT2|GBF1|CSD3|CPN20|TCH2|RBOHD|SRO5|APX1|CSD1|NFXL1|CAT1|CRY2|RCD1|NIA2|AT1G54410|CRK2|NIA1|ALDH5F1	-6.77277	6	14	1	1	1	-7.62131	2.72371	0.33261
0	1	1	0	0	0	0	0	1	0	-2.87511	-3.91649	0	0	0	0	0	-2.76419	GO:0003857	M011000001	3	0.297419	GO Molecular Functions	21	3-hydroxyacyl-CoA dehydrogenase activity		-4.3131	32.3562	9.66122	18896	4	438	3	0.684932	0.394089	819870|829022|843947	MFP2|AIM1|ECH2	-3.7875	12	15	0	0	1	-4.3131	32.3562	0.380981
0	1	1	0	0	0	0	0	1	0	-2.50067	-3.25555	0	0	0	0	0	-3.78308	GO:0004165	M011000001	3	0.298888	GO Molecular Functions	21	dodecenoyl-CoA delta-isomerase activity		-3.3818	16.9979	6.84346	18896	5	667	3	0.449775	0.259093	819870|827088|829022	MFP2|IBR10|AIM1	-2.98803	10	15	0	0	0	-4.3131	32.3562	0.380981
0	1	1	0	0	0	0	0	1	0	-2.63033	-4.07389	0	0	0	0	0	-3.583	GO:0016863	M011000001	3	0.317976	GO Molecular Functions	21	intramolecular oxidoreductase activity, transposing C=C bonds		-3.77407	12.591	6.65299	18896	9	667	4	0.5997	0.29895	819870|820960|827088|829022	MFP2|IPP2|IBR10|AIM1	-3.32243	10	15	0	0	0	-4.3131	32.3562	0.380981
0	1	1	0	0	0	0	0	1	0	-2.63033	-5.38297	0	0	0	0	0	-4.84765	GO:0004300	M011000001	3	0.380981	GO Molecular Functions	21	enoyl-CoA hydratase activity		-3.77407	12.591	6.65299	18896	9	667	4	0.5997	0.29895	819870|827088|829022|843947	MFP2|IBR10|AIM1|ECH2	-3.32243	10	15	1	1	0	-4.3131	32.3562	0.380981
0	1	1	0	0	0	0	0	0	0	-2.05508	-3.4208	0	0	0	0	0	0	GO:0002790	M011000000	2	0.228858	GO Biological Processes	19	peptide secretion	19_GO:0051179 localization	-3.91442	5.66451	5.36518	18896	19	1229	7	0.569569	0.214663	814675|823749|829596|830626|832139|836105|836300	STL2P|RABE1c|AT4G34450|Tudor1|AT5G20165|AT5G59840|Tudor2	-3.44282	8	16	1	1	1	-3.91442	5.66451	0.228858
0	1	1	0	0	0	0	0	0	0	-2.05508	-3.4208	0	0	0	0	0	0	GO:0009306	M011000000	2	0.228858	GO Biological Processes	19	protein secretion	19_GO:0051179 localization	-3.91442	5.66451	5.36518	18896	19	1229	7	0.569569	0.214663	814675|823749|829596|830626|832139|836105|836300	STL2P|RABE1c|AT4G34450|Tudor1|AT5G20165|AT5G59840|Tudor2	-3.44282	8	16	0	0	0	-3.91442	5.66451	0.228858
0	1	0	0	0	0	0	0	0	0	-3.45357	0	0	0	0	0	0	0	GO:0035308	M010000000	1	0.190417	GO Biological Processes	19	negative regulation of protein dephosphorylation	19_GO:0048519 negative regulation of biological process	-2.64779	7.62858	4.45958	18896	3	2477	3	0.121114	0.069883	817688|836534|843284	INH3|AT5G64130|AT1G69510	-2.37012	4	17	1	1	1	-2.64779	7.62858	0.190417
0	1	0	0	0	0	0	0	0	0	-2.87511	0	0	0	0	0	0	0	GO:0035305	M010000000	1	0.153264	GO Biological Processes	19	negative regulation of dephosphorylation	19_GO:0048519 negative regulation of biological process	-2.09062	5.72144	3.66799	18896	4	2477	3	0.121114	0.069883	817688|836534|843284	INH3|AT5G64130|AT1G69510	-1.90592	4	17	0	0	0	-2.64779	7.62858	0.190417
1	0	0	0	1	0	0	0	0	-5.09226	0	0	0	-2.37788	0	0	0	0	GO:0051187	M100010000	2	0.314866	GO Biological Processes	19	cofactor catabolic process	19_GO:0008152 metabolic process	-2.91498	2.2702	3.58761	18896	62	2148	16	0.744879	0.185525	816623|817208|819778|821463|822402|823622|824454|826942|829256|829652|829661|831225|834363|837304|838652|839773	PSB29|TED4|PRXIIF|ABF4|MDAR4|ACD1|MDAR1|NYC1|AT4G31290|APX3|CAT2|PPH|ETFBETA|APX1|CAT1|NUDX15	-2.59604	5	18	1	1	1	-2.91498	2.96667	0.314866
0	0	0	0	1	0	0	0	0	0	0	0	0	-2.93237	0	0	0	0	GO:0015996	M000010000	1	0.157117	GO Biological Processes	19	chlorophyll catabolic process	19_GO:0008152 metabolic process	-2.25143	2.96667	3.2423	18896	18	2477	7	0.2826	0.106662	816623|821463|823622|826942|831225|834363|838668	PSB29|ABF4|ACD1|NYC1|PPH|ETFBETA|SAUL1	-2.04013	4	18	0	0	0	-2.91498	2.96667	0.314866
0	0	0	0	1	0	0	0	0	0	0	0	0	-2.33109	0	0	0	0	GO:0006787	M000010000	1	0.114527	GO Biological Processes	19	porphyrin-containing compound catabolic process	19_GO:0008152 metabolic process	-2.16748	2.65342	3.0817	18896	23	2477	8	0.322971	0.114003	816623|817208|821463|823622|826942|831225|834363|838668	PSB29|TED4|ABF4|ACD1|NYC1|PPH|ETFBETA|SAUL1	-1.96985	4	18	0	0	0	-2.91498	2.96667	0.314866
0	0	0	0	1	0	0	0	0	0	0	0	0	-2.33109	0	0	0	0	GO:0033015	M000010000	1	0.114527	GO Biological Processes	19	tetrapyrrole catabolic process	19_GO:0008152 metabolic process	-2.16748	2.65342	3.0817	18896	23	2477	8	0.322971	0.114003	816623|817208|821463|823622|826942|831225|834363|838668	PSB29|TED4|ABF4|ACD1|NYC1|PPH|ETFBETA|SAUL1	-1.96985	4	18	0	0	0	-2.91498	2.96667	0.314866
0	0	0	1	0	0	1	1	1	0	0	0	-17.752	0	0	-4.18891	-11.3577	-5.53252	GO:0099503	M000100111	4	0.559395	GO Cellular Components	20	secretory vesicle		-4.00531	1.80793	4.14641	18896	173	2477	41	1.65523	0.256355	816830|817318|817546|818952|819935|820255|820352|821834|822115|822594|823530|824816|825044|827135|827348|828696|829176|830128|830577|832185|832669|833406|834035|834904|835860|836158|836245|837474|837731|837740|838280|838769|838770|838776|839688|839952|841122|843526|843948|844220|844222	SNG1|AT2G27720|CYP5|TI1|AT3G07470|GLY2|AT3G11780|PBD1|FKBP15-1|UGD2|AT3G44100|HIT3|CSY2|PBD2|AT4G16500|AT4G25900|GGP1|PLAT1|PGIP1|GER3|TGG1|PAP26|GRXC2|DIR1|TCH4|ALP|AT5G61240|AT1G09490|GLX1|APA1|HBP1|AT1G21670|AT1G21680|PBC1|LTPG1|AT1G30720|RD21A|AT1G71950|sks5|AT1G78830|AT1G78850	-3.52157	4	19	1	1	1	-4.00531	1.80793	0.559395
0	1	1	0	0	1	0	0	0	0	-5.8331	-2.78434	0	0	-7.80662	0	0	0	GO:0000027	M011001000	3	0.448868	GO Biological Processes	19	ribosomal large subunit assembly	19_GO:0071840 cellular component organization or biogenesis	-6.30912	4.39851	6.44486	18896	28	2148	14	0.651769	0.173624	818234|818531|818636|819095|821942|822138|824468|824694|833970|837993|838245|839109|842454|842976	RPL24A|RPL23AA|AT2G40430|AT2G44860|AT3G23620|ATL5|STV1|RPL23AB|RPL5B|SAC52|AT1G16740|AT1G25260|RPL3B|SAG24	-5.56819	5	20	0	0	0	-16.2593	4.39851	0.545516
1	1	1	0	0	1	0	0	1	-4.6091	-12.8848	-11.2035	0	0	-10.233	0	0	-2.35193	GO:0034622	M111001001	5	0.491852	GO Biological Processes	19	cellular protein-containing complex assembly	19_GO:0071840 cellular component organization or biogenesis	-15.2197	2.15025	9.07658	18896	542	1897	117	6.16763	0.552334	814780|816389|816467|816605|816623|816925|817081|817576|817612|817646|818131|818234|818304|818311|818324|818531|818557|818594|818636|818761|819060|819095|819377|819382|819718|820367|820615|821412|821447|821942|822138|823741|823746|824246|824352|824468|824694|824818|824858|825454|826746|826849|827049|827111|827257|827773|828163|828571|828637|828717|829025|829056|829145|829874|830019|830063|830853|…	AT2G02510|AT2G18740|NAP1;2|AT2G20760|PSB29|SNRNP-G|AT2G25430|U2B''|AT2G30620|VAR2|MOR1|RPL24A|RPS5B|RS2Z33|AT2G37470|RPL23AA|AT2G39725|CLC2|AT2G40430|TFIIB|AT2G44525|AT2G44860|AT2G47640|AT2G47690|RPT5A|RPS5A|CID4|AT3G18790|RBP47B|AT3G23620|ATL5|HTB9|HTB11|PSBO2|AT3G51890|STV1|RPL23AB|AT3G56510|PSRP5|AT3G62790|EIF3A|Hop3|COP9|AT4G14615|AT4G15770|PCAP1|AT4G02840|NBR1|FKBP53|NAP1;1|RPT2a|PFN2|RUXF|H…	-13.7916	6	20	0	0	0	-16.2593	4.39851	0.545516
0	1	1	0	0	1	0	0	0	0	-2.66095	-7.85322	0	0	-9.29636	0	0	0	GO:0042254	M011001000	3	0.491333	GO Biological Processes	19	ribosome biogenesis	19_GO:0071840 cellular component organization or biogenesis	-3.95091	1.54484	3.99439	18896	410	2148	72	3.35196	0.388355	814908|816569|816986|817977|818234|818304|818531|818636|818985|819018|819095|820367|821062|821942|821994|822138|824379|824403|824468|824694|824818|824882|826873|827257|827493|827661|828136|828193|828333|828678|828935|829269|829408|830337|830403|830524|830714|831209|831303|831431|831541|831565|832124|832138|832182|833970|834154|834779|834877|835090|835612|835833|837128|837455|837821|837834|837993|…	NMD3|NOP10|FZF|AT2G34160|RPL24A|RPS5B|RPL23AA|AT2G40430|LSM6B|AT2G44120|AT2G44860|RPS5A|AT3G03920|AT3G23620|AT3G24080|ATL5|PSRP2|CP33|STV1|RPL23AB|AT3G56510|NAP57|AT4G12600|AT4G15770|AT4G17720|ABCE2|MEE49|AT4G02720|AT4G22380|AT4G25730|AT4G28200|AT4G31420|La1|AT5G04600|AT5G05210|AT5G06360|AT5G08180|SVR3|AT5G14520|AT5G15750|DOT2|XPO1A|RAN2|AT5G20160|AT5G20600|RPL5B|RPS10B|RPS19|AT5G48240|CP31B|RAN3…	-3.47493	5	20	0	0	0	-16.2593	4.39851	0.545516
0	1	1	0	0	1	0	0	0	0	-7.23007	-8.24591	0	0	-9.45056	0	0	0	GO:0022618	M011001000	3	0.488614	GO Biological Processes	19	ribonucleoprotein complex assembly	19_GO:0071840 cellular component organization or biogenesis	-8.84685	2.62445	7.04374	18896	167	1897	44	2.31945	0.345591	816389|816925|817576|818234|818304|818311|818531|818636|819095|819377|820367|820615|821412|821447|821942|822138|824468|824694|824818|826746|827257|828163|829145|830853|831063|832834|832986|833970|834154|834779|835215|836548|837993|838245|838714|839109|839238|839567|840582|841857|842454|843569|844021|844119	AT2G18740|SNRNP-G|U2B''|RPL24A|RPS5B|RS2Z33|RPL23AA|AT2G40430|AT2G44860|AT2G47640|RPS5A|CID4|AT3G18790|RBP47B|AT3G23620|ATL5|STV1|RPL23AB|AT3G56510|EIF3A|AT4G15770|AT4G02840|RUXF|NRPB4|AT5G11900|emb1644|AT5G28740|RPL5B|RPS10B|RPS19|AT5G51410|AT5G64270|SAC52|AT1G16740|LSM3A|AT1G25260|EIF2 GAMMA|AT1G03140|AT1G36730|CID3|RPL3B|P40|LSM3B|AT1G77840	-7.89945	6	20	0	0	0	-16.2593	4.39851	0.545516
0	1	1	0	0	1	0	0	0	0	-6.66693	-7.97961	0	0	-8.83484	0	0	0	GO:0071826	M011001000	3	0.47949	GO Biological Processes	19	ribonucleoprotein complex subunit organization	19_GO:0071840 cellular component organization or biogenesis	-8.08543	2.49025	6.63525	18896	176	1897	44	2.31945	0.345591	816389|816925|817576|818234|818304|818311|818531|818636|819095|819377|820367|820615|821412|821447|821942|822138|824468|824694|824818|826746|827257|828163|829145|830853|831063|832834|832986|833970|834154|834779|835215|836548|837993|838245|838714|839109|839238|839567|840582|841857|842454|843569|844021|844119	AT2G18740|SNRNP-G|U2B''|RPL24A|RPS5B|RS2Z33|RPL23AA|AT2G40430|AT2G44860|AT2G47640|RPS5A|CID4|AT3G18790|RBP47B|AT3G23620|ATL5|STV1|RPL23AB|AT3G56510|EIF3A|AT4G15770|AT4G02840|RUXF|NRPB4|AT5G11900|emb1644|AT5G28740|RPL5B|RPS10B|RPS19|AT5G51410|AT5G64270|SAC52|AT1G16740|LSM3A|AT1G25260|EIF2 GAMMA|AT1G03140|AT1G36730|CID3|RPL3B|P40|LSM3B|AT1G77840	-7.19711	6	20	0	0	0	-16.2593	4.39851	0.545516
1	1	1	0	0	1	0	0	1	-4.20388	-11.8672	-12.2376	0	0	-10.3448	0	0	-3.95744	GO:0065003	M111001001	5	0.474116	GO Biological Processes	19	protein-containing complex assembly	19_GO:0071840 cellular component organization or biogenesis	-15.1675	2.05219	8.98033	18896	631	1897	130	6.85293	0.580081	814675|814780|816389|816467|816605|816623|816925|817081|817576|817612|817646|818131|818234|818304|818311|818324|818531|818557|818594|818636|818761|819060|819095|819364|819377|819382|819718|820367|820615|821412|821447|821942|822138|823741|823746|824246|824352|824468|824694|824818|824858|825430|825454|825648|826690|826746|826849|827049|827111|827257|827773|828163|828571|828637|828717|829025|829056|…	STL2P|AT2G02510|AT2G18740|NAP1;2|AT2G20760|PSB29|SNRNP-G|AT2G25430|U2B''|AT2G30620|VAR2|MOR1|RPL24A|RPS5B|RS2Z33|AT2G37470|RPL23AA|AT2G39725|CLC2|AT2G40430|TFIIB|AT2G44525|AT2G44860|FUM1|AT2G47640|AT2G47690|RPT5A|RPS5A|CID4|AT3G18790|RBP47B|AT3G23620|ATL5|HTB9|HTB11|PSBO2|AT3G51890|STV1|RPL23AB|AT3G56510|PSRP5|AT3G62560|AT3G62790|CUL1|KELP|EIF3A|Hop3|COP9|AT4G14615|AT4G15770|PCAP1|AT4G02840|NBR1|…	-13.7437	6	20	0	0	0	-16.2593	4.39851	0.545516
0	1	1	0	0	1	0	0	0	0	-5.3632	-3.20801	0	0	-8.17183	0	0	0	GO:0042255	M011001000	3	0.451351	GO Biological Processes	19	ribosome assembly	19_GO:0071840 cellular component organization or biogenesis	-5.04745	2.88724	5.24635	18896	69	1897	20	1.0543	0.234502	818234|818304|818531|818636|819095|820367|821942|822138|824468|824694|824818|827257|833970|834154|834779|837993|838245|839109|842454|843569	RPL24A|RPS5B|RPL23AA|AT2G40430|AT2G44860|RPS5A|AT3G23620|ATL5|STV1|RPL23AB|AT3G56510|AT4G15770|RPL5B|RPS10B|RPS19|SAC52|AT1G16740|AT1G25260|RPL3B|P40	-4.43263	6	20	0	0	0	-16.2593	4.39851	0.545516
0	1	1	0	0	1	0	0	0	0	-2.46203	-2.34163	0	0	-4.51875	0	0	0	GO:0070925	M011001000	3	0.306658	GO Biological Processes	19	organelle assembly	19_GO:0071840 cellular component organization or biogenesis	-2.93077	1.7894	3.42289	18896	167	1897	30	1.58144	0.286439	818234|818304|818531|818636|819095|820367|820615|821447|821453|821942|822138|824468|824694|824818|825452|825736|827257|832834|833970|834154|834779|835015|837993|838245|838714|839109|841857|842454|843569|844021	RPL24A|RPS5B|RPL23AA|AT2G40430|AT2G44860|RPS5A|CID4|RBP47B|ATG2|AT3G23620|ATL5|STV1|RPL23AB|AT3G56510|AtATG18a|PUX4|AT4G15770|emb1644|RPL5B|RPS10B|RPS19|AT5G49540|SAC52|AT1G16740|LSM3A|AT1G25260|CID3|RPL3B|P40|LSM3B	-2.60961	6	20	0	0	0	-16.2593	4.39851	0.545516
1	1	1	0	0	1	0	0	1	-3.1987	-13.2526	-14.2379	0	0	-12.8384	0	0	-3.82205	GO:0043933	M111001001	5	0.502906	GO Biological Processes	19	protein-containing complex subunit organization	19_GO:0071840 cellular component organization or biogenesis	-16.2593	2.01427	9.28311	18896	722	1897	146	7.69636	0.611954	814675|814780|816171|816389|816467|816605|816623|816925|817081|817576|817612|817646|817676|818131|818234|818246|818304|818311|818324|818531|818557|818594|818636|818761|819060|819095|819364|819377|819382|819718|820142|820367|820615|821412|821447|821942|822138|823741|823743|823744|823746|824246|824352|824468|824694|824818|824858|825430|825454|825648|826690|826746|826849|827049|827111|827257|827661|…	STL2P|AT2G02510|ADF5|AT2G18740|NAP1;2|AT2G20760|PSB29|SNRNP-G|AT2G25430|U2B''|AT2G30620|VAR2|ADF6|MOR1|RPL24A|SWC2|RPS5B|RS2Z33|AT2G37470|RPL23AA|AT2G39725|CLC2|AT2G40430|TFIIB|AT2G44525|AT2G44860|FUM1|AT2G47640|AT2G47690|RPT5A|CDC48|RPS5A|CID4|AT3G18790|RBP47B|AT3G23620|ATL5|HTB9|ADF2|ADF1|HTB11|PSBO2|AT3G51890|STV1|RPL23AB|AT3G56510|PSRP5|AT3G62560|AT3G62790|CUL1|KELP|EIF3A|Hop3|COP9|AT4G14615|…	-14.7574	6	20	0	0	1	-16.2593	4.39851	0.545516
0	1	1	0	0	1	0	0	0	0	-4.58878	-12.571	0	0	-11.7238	0	0	0	GO:0022613	M011001000	3	0.545516	GO Biological Processes	19	ribonucleoprotein complex biogenesis	19_GO:0071840 cellular component organization or biogenesis	-6.93604	1.69308	5.64796	18896	504	2148	97	4.51583	0.448041	814908|816389|816569|816925|816986|817576|817977|818234|818304|818311|818531|818636|818985|819018|819095|819377|820367|820615|821062|821412|821447|821942|821994|822138|824379|824403|824468|824694|824818|824882|826746|826873|827257|827493|827661|828136|828163|828193|828333|828678|828935|829145|829269|829408|830337|830403|830524|830714|830853|831063|831209|831303|831431|831541|831565|832124|832138|…	NMD3|AT2G18740|NOP10|SNRNP-G|FZF|U2B''|AT2G34160|RPL24A|RPS5B|RS2Z33|RPL23AA|AT2G40430|LSM6B|AT2G44120|AT2G44860|AT2G47640|RPS5A|CID4|AT3G03920|AT3G18790|RBP47B|AT3G23620|AT3G24080|ATL5|PSRP2|CP33|STV1|RPL23AB|AT3G56510|NAP57|EIF3A|AT4G12600|AT4G15770|AT4G17720|ABCE2|MEE49|AT4G02840|AT4G02720|AT4G22380|AT4G25730|AT4G28200|RUXF|AT4G31420|La1|AT5G04600|AT5G05210|AT5G06360|AT5G08180|NRPB4|AT5G11900|…	-6.13776	5	20	1	1	0	-16.2593	4.39851	0.545516
1	1	0	0	1	1	1	0	1	-3.39253	-3.8561	0	0	-3.11134	-3.08384	-4.4936	0	-5.8616	GO:0010193	M110011101	6	0.298088	GO Biological Processes	19	response to ozone	19_GO:0050896 response to stimulus	-8.73165	4.2381	7.55325	18896	36	2477	20	0.807428	0.179816	815160|818562|819244|821048|821225|826213|826884|828409|828613|831928|832820|834244|837405|837708|838122|838544|840115|841564|843389|2745879	OPR3|CYT1|JAR1|AT3G17800|AT3G02840|ATOZI1|NUDT7|GSH1|FSD1|CSD3|LACS7|CML37|CSD1|RBP45B|ABCG40|DHAR1|RCD1|AT1G51400|CRK2|SAG20	-7.79602	4	21	1	1	1	-8.73165	4.2381	0.298088
1	1	1	1	1	1	1	1	1	-15.0704	-21.1086	-18.9131	-2.76249	-6.17627	-25.6905	-6.35124	-5.99035	-20.1351	GO:0010038	M111111111	9	0.322875	GO Biological Processes	19	response to metal ion	19_GO:0050896 response to stimulus	-39.7396	2.88649	15.6238	18896	444	2477	168	6.7824	0.505217	814643|815101|815120|816248|816467|816561|816672|816847|816867|816931|816954|817014|817194|817244|817562|817636|817637|817648|817784|817925|817940|818226|818319|818353|818736|818978|819011|819042|819236|819293|819567|819778|819963|820083|820140|820142|820263|820499|820605|820728|820735|820770|820816|821451|821584|821774|821784|821861|821870|822117|822171|823492|823955|824060|824355|824454|824459|…	PDE345|GRP-3|ACO3|NTRA|NAP1;2|AT2G20420|FBA1|NRAMP3|PAB4|CNGC6|LAP1|ARF3|AR781|PAG1|UBA1|GSTF9|GSTF10|ASP1|AT2G32240|CRL1|CUTA|LOS2|ZAT11|AKR4C8|AT2G41380|OASB|AT2G44060|ATCS|TRIP-1|ZAT|GAPC1|PRXIIF|AT3G07720|GSTU8|ADK1|CDC48|MSD1|SERAT2;2|EIF4A1|DJ1A|RABA1g|COX17|PLDALPHA1|PREP1|AT3G20390|PAC1|POP2|APS1|PKP-ALPHA|ROF1|PP2AA2|CAM7|ALDH2B4|AAE3|CAM9|MDAR1|FBA8|AT3G52990|FER3|AT3G58610|DL1E|NDPK1|R…	-37.5992	4	22	1	1	0	-43.5888	3.66772	0.322875
1	1	1	1	1	1	1	1	1	-17.6541	-22.7545	-21.6349	-2.05595	-9.0277	-26.3975	-6.40227	-5.91712	-18.5843	GO:0046686	M111111111	9	0.320142	GO Biological Processes	19	response to cadmium ion	19_GO:0050896 response to stimulus	-43.5888	3.66772	17.2091	18896	319	2148	133	6.19181	0.52001	814643|815120|816248|816467|816561|816672|816867|816931|816954|817014|817244|817562|817636|817637|817648|817784|818226|818353|818736|818978|819042|819236|819567|819778|820083|820140|820142|820499|820605|820728|820735|820816|821584|821774|821784|821861|821870|822117|822171|823955|824060|824454|824459|824465|825030|825189|826515|826738|826765|826975|827039|827135|827145|827381|827452|827734|827931|…	PDE345|ACO3|NTRA|NAP1;2|AT2G20420|FBA1|PAB4|CNGC6|LAP1|ARF3|PAG1|UBA1|GSTF9|GSTF10|ASP1|AT2G32240|LOS2|AKR4C8|AT2G41380|OASB|ATCS|TRIP-1|GAPC1|PRXIIF|GSTU8|ADK1|CDC48|SERAT2;2|EIF4A1|DJ1A|RABA1g|PLDALPHA1|AT3G20390|PAC1|POP2|APS1|PKP-ALPHA|ROF1|PP2AA2|ALDH2B4|AAE3|MDAR1|FBA8|AT3G52990|AT3G58610|DL1E|NDPK1|RHA1B|GPX6|IIL1|SBP1|PBD2|OASA1|ACX1|AT4G17410|AT4G19880|GSTF2|HIP1|GSH1|FSD1|ACO2|RPT2a|emb…	-41.1639	5	22	0	0	1	-43.5888	3.66772	0.322875
0	1	1	0	0	1	0	0	0	0	-2.01902	-4.76612	0	0	-4.65106	0	0	0	GO:0000470	M011001000	3	0.357567	GO Biological Processes	19	maturation of LSU-rRNA	19_GO:0071840 cellular component organization or biogenesis	-4.1545	3.93317	5.07865	18896	43	1229	11	0.895037	0.268653	819018|821942|826873|828136|828333|830337|830524|830714|831303|832138|834877	AT2G44120|AT3G23620|AT4G12600|MEE49|AT4G22380|AT5G04600|AT5G06360|AT5G08180|AT5G14520|AT5G20160|AT5G48240	-3.65065	8	23	0	0	0	-8.63559	4.05497	0.523992
0	0	1	0	0	1	0	0	0	0	0	-11.8771	0	0	-6.23503	0	0	0	GO:0030684	M001001000	2	0.523992	GO Cellular Components	20	preribosome		-3.94978	2.4595	4.39735	18896	81	1897	20	1.0543	0.234502	816986|819231|821994|825207|826873|827257|828136|828333|828678|828935|830524|830741|831303|831431|832138|832182|834877|836786|837821|839109	FZF|AT2G46230|AT3G24080|EDA14|AT4G12600|AT4G15770|MEE49|AT4G22380|AT4G25730|AT4G28200|AT5G06360|AT5G08420|AT5G14520|AT5G15750|AT5G20160|AT5G20600|AT5G48240|AT5G66540|AT1G12650|AT1G25260	-3.47392	6	23	1	1	0	-8.63559	4.05497	0.523992
0	1	1	0	0	1	0	0	0	0	-4.24121	-8.23943	0	0	-10.5224	0	0	0	GO:0042273	M011001000	3	0.507919	GO Biological Processes	19	ribosomal large subunit biogenesis	19_GO:0071840 cellular component organization or biogenesis	-8.63559	4.05497	7.70476	18896	91	1229	24	1.95281	0.394704	818531|818636|819018|819095|821942|822138|824694|826873|827257|828136|828333|829269|830337|830403|830524|830714|831303|832138|833970|834877|837993|838245|839109|839496	RPL23AA|AT2G40430|AT2G44120|AT2G44860|AT3G23620|ATL5|RPL23AB|AT4G12600|AT4G15770|MEE49|AT4G22380|AT4G31420|AT5G04600|AT5G05210|AT5G06360|AT5G08180|AT5G14520|AT5G20160|RPL5B|AT5G48240|SAC52|AT1G16740|AT1G25260|AT1G02870	-7.7059	8	23	0	0	1	-8.63559	4.05497	0.523992
0	0	1	0	0	1	0	0	0	0	0	-4.96236	0	0	-3.16597	0	0	0	GO:0030687	M001001000	2	0.328263	GO Cellular Components	20	preribosome, large subunit precursor		-3.37366	3.9844	4.46079	18896	20	1897	8	0.421719	0.148785	816986|827257|828136|828678|830524|832182|834877|839109	FZF|AT4G15770|MEE49|AT4G25730|AT5G06360|AT5G20600|AT5G48240|AT1G25260	-2.9816	6	23	0	0	0	-8.63559	4.05497	0.523992
1	1	1	0	0	0	0	0	0	-3.74967	-3.46486	-2.56249	0	0	0	0	0	0	GO:0000313	M111000000	3	0.303088	GO Cellular Components	20	organellar ribosome		-2.27873	2.24605	3.06301	18896	47	2148	12	0.558659	0.16082	818015|821078|821088|821211|821799|823623|829027|830147|834779|837298|843836|844324	RPS14|AT3G01790|AT3G01740|RPS2|RPS10|RPL9|emb2726|AT4G39880|RPS19|AT1G07830|RPS9|RPS17	-2.06283	5	24	0	0	0	-2.82478	4.269	0.305077
1	1	1	0	0	0	0	0	0	-2.83718	-3.64739	-3.6109	0	0	0	0	0	0	GO:0000314	M111000000	3	0.305077	GO Cellular Components	20	organellar small ribosomal subunit		-2.82478	4.269	4.08743	18896	14	1897	6	0.316289	0.12892	818015|821211|821799|834779|843836|844324	RPS14|RPS2|RPS10|RPS19|RPS9|RPS17	-2.52196	6	24	1	1	1	-2.82478	4.269	0.305077
0	0	1	0	0	0	0	0	0	0	0	-2.91937	0	0	0	0	0	0	GO:0060590	M001000000	1	0.156246	GO Molecular Functions	21	ATPase regulator activity		-2.69383	3.19892	3.6957	18896	22	2148	8	0.372439	0.131432	820091|820379|830353|830613|831638|831703|835613|835923	Fes1A|AT3G12050|AT5G04750|BAG3|EMB1241|AT5G03030|MGE1|AT5G58110	-2.40985	5	25	0	0	0	-3.49938	3.19892	0.315744
0	0	1	0	0	0	0	0	0	0	0	-5.95807	0	0	0	0	0	0	GO:0051087	M001000000	1	0.315744	GO Molecular Functions	21	chaperone binding		-3.49938	2.85903	4.21503	18896	40	2148	13	0.605214	0.167347	816578|819925|820379|828965|830613|831638|832195|832786|835613|835923|838063|839878|2745966	AT2G20560|CHIP|AT3G12050|AT4G28480|BAG3|EMB1241|CPN20|AT5G27280|MGE1|AT5G58110|CPN10|PFD6|ZR3	-3.08839	5	25	1	1	1	-3.49938	3.19892	0.315744
0	1	1	0	1	1	1	1	1	0	-2.61583	-9.72357	0	-5.42305	-8.71041	-3.92037	-3.00974	-10.8081	GO:0051603	M011011111	7	0.384735	GO Biological Processes	19	proteolysis involved in cellular protein catabolic process	19_GO:0008152 metabolic process	-15.1686	2.73358	9.5859	18896	551	966	77	7.97101	0.871426	814805|815135|816666|817087|817111|817244|817562|818132|819718|819925|820016|820142|820956|821545|821737|821738|821774|821834|824289|824451|824478|824901|825253|825648|825847|825880|827135|827466|828241|828626|828909|829025|829257|829556|830019|830463|830850|831899|832121|832184|832378|832607|833835|834056|834290|834314|834316|834663|835056|835159|835411|835414|835714|835901|835941|836032|836374|…	UBC2|PAA2|UFD1|EBF1|SK3|PAG1|UBA1|UBQ7|RPT5A|CHIP|UBC11|CDC48|UBC32|UBC19|SK8|SK7|PAC1|PBD1|PAD1|VSR1|VPS37-1|AT3G57340|PBF1|CUL1|UBQ11|UBQ10|PBD2|UCH3|VPS28-1|RIN2|UBC9|RPT2a|PBA1|CER9|RPN10|RPN8A|EMB2107|UBQ3|RPT6A|UBQ4|NCLPP7|EBF2|RAD23D|PBB2|PAF1|UBC18|RPT4A|CUL4|emb1441|UBC27|UBC10|AT5G53330|UBC30|SKIP1|RPT3|AT5G59140|UBC3|PBE1|UBC1|PAB1|UBC36|UBC34|AT1G19310|PBC1|ATS9|RUB1|RD21A|PAF2|AT1G50…	-13.7437	9	26	0	0	0	-21.4945	16.0045	0.519436
0	1	1	0	0	1	0	1	1	0	-5.67443	-15.9743	0	0	-16.5862	0	-4.62582	-15.5526	GO:0000502	M011001011	5	0.502198	GO Cellular Components	20	proteasome complex		-20.2412	9.28322	14.7908	18896	59	966	28	2.89855	0.539777	815135|817244|819718|821774|821834|824289|825253|827135|829025|829257|830019|830463|830850|832121|834056|834290|834316|834532|835941|837863|838217|838776|839789|841128|841812|842098|842760|844080	PAA2|PAG1|RPT5A|PAC1|PBD1|PAD1|PBF1|PBD2|RPT2a|PBA1|RPN10|RPN8A|EMB2107|RPT6A|PBB2|PAF1|RPT4A|DSS1(V)|RPT3|PBE1|PAB1|PBC1|ATS9|PAF2|RPT1A|PBG1|RPN12a|PBC2	-18.5487	9	26	0	0	0	-21.4945	16.0045	0.519436
0	1	1	0	0	1	0	1	1	0	-5.67443	-15.9743	0	0	-18.8958	0	-4.62582	-17.7013	ko03050	M011001011	5	0.519436	KEGG Pathway	24	Proteasome		-21.4945	9.61477	15.3828	18896	59	966	29	3.00207	0.549039	815135|817244|819718|821774|821834|824289|825253|827135|829025|829257|830019|830463|830850|832121|834056|834290|834316|834532|835941|837863|838217|838776|839789|841128|841812|842098|842760|843045|844080	PAA2|PAG1|RPT5A|PAC1|PBD1|PAD1|PBF1|PBD2|RPT2a|PBA1|RPN10|RPN8A|EMB2107|RPT6A|PBB2|PAF1|RPT4A|DSS1(V)|RPT3|PBE1|PAB1|PBC1|ATS9|PAF2|RPT1A|PBG1|RPN12a|AT1G67250|PBC2	-19.7856	9	26	0	0	0	-21.4945	16.0045	0.519436
0	1	1	0	0	1	0	1	1	0	-5.67443	-15.9743	0	0	-18.8958	0	-4.62582	-17.7013	ath03050	M011001011	5	0.519436	KEGG Pathway	24	Proteasome		-21.4945	9.61477	15.3828	18896	59	966	29	3.00207	0.549039	815135|817244|819718|821774|821834|824289|825253|827135|829025|829257|830019|830463|830850|832121|834056|834290|834316|834532|835941|837863|838217|838776|839789|841128|841812|842098|842760|843045|844080	PAA2|PAG1|RPT5A|PAC1|PBD1|PAD1|PBF1|PBD2|RPT2a|PBA1|RPN10|RPN8A|EMB2107|RPT6A|PBB2|PAF1|RPT4A|DSS1(V)|RPT3|PBE1|PAB1|PBC1|ATS9|PAF2|RPT1A|PBG1|RPN12a|AT1G67250|PBC2	-19.7856	9	26	1	1	1	-21.4945	16.0045	0.519436
0	1	1	0	0	1	0	1	1	0	-3.94269	-11.9324	0	0	-14.6775	0	-4.06777	-14.1526	ath_M00340	M011001011	5	0.501521	KEGG Structural Complexes	25	Proteasome, 20S core particle		-15.4718	13.6077	14.0427	18896	23	966	16	1.65631	0.410635	815135|817244|821774|821834|824289|825253|827135|829257|834056|834290|837863|838217|838776|841128|842098|844080	PAA2|PAG1|PAC1|PBD1|PAD1|PBF1|PBD2|PBA1|PBB2|PAF1|PBE1|PAB1|PBC1|PAF2|PBG1|PBC2	-14.0235	9	26	0	0	0	-21.4945	16.0045	0.519436
0	1	1	0	0	1	0	1	1	0	-3.76402	-14.9564	0	0	-13.4293	0	-4.75735	-12.0415	GO:1905368	M011001011	5	0.499243	GO Cellular Components	20	peptidase complex		-18.7522	7.39504	13.4704	18896	82	966	31	3.20911	0.567049	815135|817244|818583|819718|821774|821834|824289|825253|827135|829025|829257|830019|830463|830850|832121|832802|834056|834290|834316|834532|835941|837863|838217|838776|839789|841128|841692|841812|842098|842760|844080	PAA2|PAG1|AT2G39960|RPT5A|PAC1|PBD1|PAD1|PBF1|PBD2|RPT2a|PBA1|RPN10|RPN8A|EMB2107|RPT6A|AT5G27430|PBB2|PAF1|RPT4A|DSS1(V)|RPT3|PBE1|PAB1|PBC1|ATS9|PAF2|AT1G52600|RPT1A|PBG1|RPN12a|PBC2	-17.1284	9	26	0	0	0	-21.4945	16.0045	0.519436
0	1	1	0	0	1	0	1	1	0	-3.79424	-11.4422	0	0	-14.2241	0	-3.95524	-13.6499	GO:0005839	M011001011	5	0.499078	GO Cellular Components	20	proteasome core complex		-15.0157	13.0407	13.7	18896	24	966	16	1.65631	0.410635	815135|817244|821774|821834|824289|825253|827135|829257|834056|834290|837863|838217|838776|841128|842098|844080	PAA2|PAG1|PAC1|PBD1|PAD1|PBF1|PBD2|PBA1|PBB2|PAF1|PBE1|PAB1|PBC1|PAF2|PBG1|PBC2	-13.6047	9	26	0	0	0	-21.4945	16.0045	0.519436
0	1	1	0	0	1	0	1	1	0	-5.67443	-15.9743	0	0	-16.5862	0	-4.62582	-15.5526	GO:1905369	M011001011	5	0.502198	GO Cellular Components	20	endopeptidase complex		-20.2412	9.28322	14.7908	18896	59	966	28	2.89855	0.539777	815135|817244|819718|821774|821834|824289|825253|827135|829025|829257|830019|830463|830850|832121|834056|834290|834316|834532|835941|837863|838217|838776|839789|841128|841812|842098|842760|844080	PAA2|PAG1|RPT5A|PAC1|PBD1|PAD1|PBF1|PBD2|RPT2a|PBA1|RPN10|RPN8A|EMB2107|RPT6A|PBB2|PAF1|RPT4A|DSS1(V)|RPT3|PBE1|PAB1|PBC1|ATS9|PAF2|RPT1A|PBG1|RPN12a|PBC2	-18.5487	9	26	0	0	0	-21.4945	16.0045	0.519436
0	1	1	0	0	1	0	1	1	0	-3.24122	-8.572	0	0	-10.6765	0	-4.18663	-10.3619	GO:0010499	M011001011	5	0.460937	GO Biological Processes	19	proteasomal ubiquitin-independent protein catabolic process	19_GO:0008152 metabolic process	-11.3123	11.5588	11.5018	18896	22	966	13	1.34576	0.370725	815135|817244|821774|821834|824289|825253|834056|834290|838217|838776|841128|842098|844080	PAA2|PAG1|PAC1|PBD1|PAD1|PBF1|PBB2|PAF1|PAB1|PBC1|PAF2|PBG1|PBC2	-10.1906	9	26	0	0	0	-21.4945	16.0045	0.519436
0	1	1	0	1	1	1	0	1	0	-2.4182	-10.9954	0	-5.93268	-9.99328	-3.83842	0	-11.5143	GO:0019941	M011011101	6	0.43587	GO Biological Processes	19	modification-dependent protein catabolic process	19_GO:0008152 metabolic process	-16.3455	2.94211	10.1315	18896	492	966	74	7.66046	0.855722	814805|815135|816666|817087|817111|817244|817562|818132|819718|819925|820016|820142|820956|821545|821737|821738|821774|821834|824289|824451|824478|824901|825253|825648|825847|825880|827135|827466|828241|828626|828909|829025|829257|829556|830019|830463|830850|831899|832121|832184|832607|833835|834056|834290|834314|834316|834663|835056|835159|835411|835414|835714|835901|835941|836032|836374|837863|…	UBC2|PAA2|UFD1|EBF1|SK3|PAG1|UBA1|UBQ7|RPT5A|CHIP|UBC11|CDC48|UBC32|UBC19|SK8|SK7|PAC1|PBD1|PAD1|VSR1|VPS37-1|AT3G57340|PBF1|CUL1|UBQ11|UBQ10|PBD2|UCH3|VPS28-1|RIN2|UBC9|RPT2a|PBA1|CER9|RPN10|RPN8A|EMB2107|UBQ3|RPT6A|UBQ4|EBF2|RAD23D|PBB2|PAF1|UBC18|RPT4A|CUL4|emb1441|UBC27|UBC10|AT5G53330|UBC30|SKIP1|RPT3|AT5G59140|UBC3|PBE1|UBC1|PAB1|UBC36|UBC34|AT1G19310|PBC1|ATS9|RUB1|PAF2|AT1G50670|UBP6|RPT1…	-14.8331	9	26	0	0	0	-21.4945	16.0045	0.519436
0	1	1	0	1	1	1	1	1	0	-3.31203	-9.95706	0	-5.46511	-8.41785	-3.75863	-3.18676	-10.8024	GO:0044257	M011011111	7	0.37288	GO Biological Processes	19	cellular protein catabolic process	19_GO:0008152 metabolic process	-15.2805	2.72458	9.61605	18896	560	966	78	8.07453	0.876573	814805|815135|816666|817087|817111|817244|817562|818132|819718|819925|820016|820142|820956|821545|821737|821738|821774|821834|824289|824451|824478|824901|825253|825648|825847|825880|826942|827135|827466|828241|828626|828909|829025|829257|829556|830019|830463|830850|831899|832121|832184|832378|832607|833835|834056|834290|834314|834316|834663|835056|835159|835411|835414|835714|835901|835941|836032|…	UBC2|PAA2|UFD1|EBF1|SK3|PAG1|UBA1|UBQ7|RPT5A|CHIP|UBC11|CDC48|UBC32|UBC19|SK8|SK7|PAC1|PBD1|PAD1|VSR1|VPS37-1|AT3G57340|PBF1|CUL1|UBQ11|UBQ10|NYC1|PBD2|UCH3|VPS28-1|RIN2|UBC9|RPT2a|PBA1|CER9|RPN10|RPN8A|EMB2107|UBQ3|RPT6A|UBQ4|NCLPP7|EBF2|RAD23D|PBB2|PAF1|UBC18|RPT4A|CUL4|emb1441|UBC27|UBC10|AT5G53330|UBC30|SKIP1|RPT3|AT5G59140|UBC3|PBE1|UBC1|PAB1|UBC36|UBC34|AT1G19310|PBC1|ATS9|RUB1|RD21A|PAF2|A…	-13.8512	9	26	0	0	0	-21.4945	16.0045	0.519436
0	0	1	0	0	1	0	1	1	0	0	-4.93793	0	0	-8.41914	0	-4.36924	-5.95679	GO:0019773	M001001011	4	0.432249	GO Cellular Components	20	proteasome core complex, alpha-subunit complex		-5.93241	10.5329	7.98054	18896	13	966	7	0.724638	0.272893	815135|817244|821774|824289|834290|838217|841128	PAA2|PAG1|PAC1|PAD1|PAF1|PAB1|PAF2	-5.22436	9	26	0	0	0	-21.4945	16.0045	0.519436
0	1	1	0	0	1	0	0	1	0	-4.37993	-7.16196	0	0	-6.26489	0	0	-8.35048	GO:0019774	M011001001	4	0.440757	GO Cellular Components	20	proteasome core complex, beta-subunit complex		-9.93811	16.0045	11.554	18896	11	966	9	0.931677	0.309109	821834|825253|827135|829257|834056|837863|838776|842098|844080	PBD1|PBF1|PBD2|PBA1|PBB2|PBE1|PBC1|PBG1|PBC2	-8.90855	9	26	0	0	0	-21.4945	16.0045	0.519436
0	0	1	0	1	1	1	1	1	0	0	-8.94411	0	-3.666	-6.11739	-2.48406	-2.46988	-9.32137	GO:0006508	M001011111	6	0.423107	GO Biological Processes	19	proteolysis	19_GO:0008152 metabolic process	-10.4717	1.69217	7.09386	18896	785	2148	151	7.0298	0.551602	814805|814841|815135|816051|816225|816666|817087|817111|817241|817244|817456|817562|817646|818132|818240|818583|819406|819409|819718|819895|819925|820016|820142|820364|820649|820956|821357|821545|821610|821737|821738|821774|821834|824289|824451|824478|824564|824704|824901|825169|825172|825253|825648|825654|825736|825847|825880|826476|826728|826733|827049|827135|827213|827412|827462|827466|827507|…	UBC2|SPP|PAA2|AT2G15580|DSK2|UFD1|EBF1|SK3|FUS12|PAG1|ftsh3|UBA1|VAR2|UBQ7|AT2G36680|AT2G39960|DEG2|AT2G47970|RPT5A|AT3G07090|CHIP|UBC11|CDC48|UBP13|PAE2|UBC32|BTS|UBC19|UBP14|SK8|SK7|PAC1|PBD1|PAD1|VSR1|VPS37-1|AT3G53970|UBC14|AT3G57340|MAP2B|SK5|PBF1|CUL1|RMA1|PUX4|UBQ11|UBQ10|FBW2|SGT1B|AT4G11310|COP9|PBD2|AT4G15420|CLPR4|AT4G17486|UCH3|AT4G17840|RING|TPP2|UBQ14|AT4G01870|VPS28-1|RIN2|UBC9|RPT…	-9.40521	5	26	0	0	0	-21.4945	16.0045	0.519436
0	1	1	0	1	1	1	1	1	0	-3.96738	-11.2102	0	-4.24419	-8.58877	-2.83203	-2.0275	-9.75395	GO:0044265	M011011111	7	0.406544	GO Biological Processes	19	cellular macromolecule catabolic process	19_GO:0008152 metabolic process	-15.4103	2.53411	9.50746	18896	687	966	89	9.21325	0.930527	814805|814913|815135|816666|817087|817111|817244|817562|818132|819718|819925|820016|820142|820548|820956|821545|821737|821738|821774|821834|824289|824451|824478|824901|825253|825648|825847|825880|826942|827135|827466|828241|828626|828909|829025|829257|829556|829557|830019|830463|830626|830850|831899|832121|832184|832378|832607|833835|834056|834290|834314|834316|834663|835056|835159|835411|835414|…	UBC2|EMB2816|PAA2|UFD1|EBF1|SK3|PAG1|UBA1|UBQ7|RPT5A|CHIP|UBC11|CDC48|ECT2|UBC32|UBC19|SK8|SK7|PAC1|PBD1|PAD1|VSR1|VPS37-1|AT3G57340|PBF1|CUL1|UBQ11|UBQ10|NYC1|PBD2|UCH3|VPS28-1|RIN2|UBC9|RPT2a|PBA1|CER9|PAB2|RPN10|RPN8A|Tudor1|EMB2107|UBQ3|RPT6A|UBQ4|NCLPP7|EBF2|RAD23D|PBB2|PAF1|UBC18|RPT4A|CUL4|emb1441|UBC27|UBC10|AT5G53330|UBC30|SKIP1|RPT3|AT5G59140|Tudor2|UBC3|PBE1|UBC1|PAB1|UBC36|UBC34|AT1G1…	-13.971	9	26	0	0	0	-21.4945	16.0045	0.519436
0	0	1	0	0	1	0	0	1	0	0	-5.72529	0	0	-3.78255	0	0	-5.09413	GO:0043161	M001001001	3	0.396388	GO Biological Processes	19	proteasome-mediated ubiquitin-dependent protein catabolic process	19_GO:0008152 metabolic process	-8.45222	2.84657	7.0668	18896	268	966	39	4.03727	0.633296	814805|815135|816666|817087|817111|817244|819925|820142|821545|821737|821738|821774|821834|824289|824901|825253|829025|829556|830019|830463|832607|833835|834056|834290|834314|834316|835056|835901|836374|838002|838217|838300|838776|841128|841489|842098|842760|843928|844080	UBC2|PAA2|UFD1|EBF1|SK3|PAG1|CHIP|CDC48|UBC19|SK8|SK7|PAC1|PBD1|PAD1|AT3G57340|PBF1|RPT2a|CER9|RPN10|RPN8A|EBF2|RAD23D|PBB2|PAF1|UBC18|RPT4A|emb1441|SKIP1|UBC3|UBC1|PAB1|UBC34|PBC1|PAF2|AT1G50670|PBG1|RPN12a|SKP1|PBC2	-7.53654	9	26	0	0	0	-21.4945	16.0045	0.519436
0	0	1	0	0	1	0	0	1	0	0	-5.46018	0	0	-3.59155	0	0	-5.41733	GO:0010498	M001001001	3	0.393828	GO Biological Processes	19	proteasomal protein catabolic process	19_GO:0008152 metabolic process	-8.61086	2.79444	7.11017	18896	287	966	41	4.24431	0.64863	814805|815135|816666|817087|817111|817244|819718|819925|820142|821545|821737|821738|821774|821834|824289|824901|825253|829025|829556|830019|830463|832607|833835|834056|834290|834314|834316|835056|835901|836374|838002|838217|838300|838513|838776|841128|841489|842098|842760|843928|844080	UBC2|PAA2|UFD1|EBF1|SK3|PAG1|RPT5A|CHIP|CDC48|UBC19|SK8|SK7|PAC1|PBD1|PAD1|AT3G57340|PBF1|RPT2a|CER9|RPN10|RPN8A|EBF2|RAD23D|PBB2|PAF1|UBC18|RPT4A|emb1441|SKIP1|UBC3|UBC1|PAB1|UBC34|AT1G19310|PBC1|PAF2|AT1G50670|PBG1|RPN12a|SKP1|PBC2	-7.68429	9	26	0	0	0	-21.4945	16.0045	0.519436
0	1	1	0	1	1	1	0	1	0	-2.23068	-11.4941	0	-5.60081	-9.57957	-3.63211	0	-10.9945	GO:0043632	M011011101	6	0.441702	GO Biological Processes	19	modification-dependent macromolecule catabolic process	19_GO:0008152 metabolic process	-15.8098	2.87777	9.90769	18896	503	966	74	7.66046	0.855722	814805|815135|816666|817087|817111|817244|817562|818132|819718|819925|820016|820142|820956|821545|821737|821738|821774|821834|824289|824451|824478|824901|825253|825648|825847|825880|827135|827466|828241|828626|828909|829025|829257|829556|830019|830463|830850|831899|832121|832184|832607|833835|834056|834290|834314|834316|834663|835056|835159|835411|835414|835714|835901|835941|836032|836374|837863|…	UBC2|PAA2|UFD1|EBF1|SK3|PAG1|UBA1|UBQ7|RPT5A|CHIP|UBC11|CDC48|UBC32|UBC19|SK8|SK7|PAC1|PBD1|PAD1|VSR1|VPS37-1|AT3G57340|PBF1|CUL1|UBQ11|UBQ10|PBD2|UCH3|VPS28-1|RIN2|UBC9|RPT2a|PBA1|CER9|RPN10|RPN8A|EMB2107|UBQ3|RPT6A|UBQ4|EBF2|RAD23D|PBB2|PAF1|UBC18|RPT4A|CUL4|emb1441|UBC27|UBC10|AT5G53330|UBC30|SKIP1|RPT3|AT5G59140|UBC3|PBE1|UBC1|PAB1|UBC36|UBC34|AT1G19310|PBC1|ATS9|RUB1|PAF2|AT1G50670|UBP6|RPT1…	-14.3391	9	26	0	0	0	-21.4945	16.0045	0.519436
0	1	1	0	1	1	1	1	1	0	-4.03713	-10.5672	0	-5.72863	-8.10283	-3.65744	-2.90049	-10.2555	GO:0030163	M011011111	7	0.369254	GO Biological Processes	19	protein catabolic process	19_GO:0008152 metabolic process	-14.8349	2.6552	9.41438	18896	582	966	79	8.17805	0.881677	814805|815135|816666|817087|817111|817241|817244|817562|818132|819718|819925|820016|820142|820956|821545|821737|821738|821774|821834|824289|824451|824478|824901|825253|825648|825847|825880|826942|827135|827466|828241|828626|828909|829025|829257|829556|830019|830463|830850|831899|832121|832184|832378|832607|833835|834056|834290|834314|834316|834663|835056|835159|835411|835414|835714|835901|835941|…	UBC2|PAA2|UFD1|EBF1|SK3|FUS12|PAG1|UBA1|UBQ7|RPT5A|CHIP|UBC11|CDC48|UBC32|UBC19|SK8|SK7|PAC1|PBD1|PAD1|VSR1|VPS37-1|AT3G57340|PBF1|CUL1|UBQ11|UBQ10|NYC1|PBD2|UCH3|VPS28-1|RIN2|UBC9|RPT2a|PBA1|CER9|RPN10|RPN8A|EMB2107|UBQ3|RPT6A|UBQ4|NCLPP7|EBF2|RAD23D|PBB2|PAF1|UBC18|RPT4A|CUL4|emb1441|UBC27|UBC10|AT5G53330|UBC30|SKIP1|RPT3|AT5G59140|UBC3|PBE1|UBC1|PAB1|UBC36|UBC34|AT1G19310|PBC1|ATS9|RUB1|RD21A|…	-13.4414	9	26	0	0	0	-21.4945	16.0045	0.519436
0	1	1	0	1	1	1	0	1	0	-2.59907	-11.1798	0	-5.61212	-9.94804	-3.43338	0	-11.1703	GO:0006511	M011011101	6	0.436178	GO Biological Processes	19	ubiquitin-dependent protein catabolic process	19_GO:0008152 metabolic process	-15.7502	2.92199	9.92137	18896	482	966	72	7.45342	0.845025	814805|815135|816666|817087|817111|817244|817562|818132|819718|819925|820016|820142|820956|821545|821737|821738|821774|821834|824289|824451|824478|824901|825253|825648|825847|827135|827466|828241|828626|828909|829025|829257|829556|830019|830463|830850|831899|832121|832184|832607|833835|834056|834290|834314|834316|834663|835056|835159|835411|835414|835714|835901|835941|836032|836374|837863|838002|…	UBC2|PAA2|UFD1|EBF1|SK3|PAG1|UBA1|UBQ7|RPT5A|CHIP|UBC11|CDC48|UBC32|UBC19|SK8|SK7|PAC1|PBD1|PAD1|VSR1|VPS37-1|AT3G57340|PBF1|CUL1|UBQ11|PBD2|UCH3|VPS28-1|RIN2|UBC9|RPT2a|PBA1|CER9|RPN10|RPN8A|EMB2107|UBQ3|RPT6A|UBQ4|EBF2|RAD23D|PBB2|PAF1|UBC18|RPT4A|CUL4|emb1441|UBC27|UBC10|AT5G53330|UBC30|SKIP1|RPT3|AT5G59140|UBC3|PBE1|UBC1|PAB1|UBC36|UBC34|AT1G19310|PBC1|ATS9|PAF2|AT1G50670|UBP6|RPT1A|PBG1|RPN1…	-14.2856	9	26	0	0	0	-21.4945	16.0045	0.519436
0	1	1	0	0	1	0	1	1	0	-3.94269	-11.9324	0	0	-14.6775	0	-4.06777	-14.1526	M00340	M011001011	5	0.501521	KEGG Structural Complexes	25	Proteasome, 20S core particle		-15.4718	13.6077	14.0427	18896	23	966	16	1.65631	0.410635	815135|817244|821774|821834|824289|825253|827135|829257|834056|834290|837863|838217|838776|841128|842098|844080	PAA2|PAG1|PAC1|PBD1|PAD1|PBF1|PBD2|PBA1|PBB2|PAF1|PBE1|PAB1|PBC1|PAF2|PBG1|PBC2	-14.0235	9	26	0	0	0	-21.4945	16.0045	0.519436
0	1	1	0	1	1	1	0	0	0	-6.03264	-8.83032	0	-5.8728	-7.75628	-2.27522	0	0	GO:0008380	M011011100	5	0.425229	GO Biological Processes	19	RNA splicing	19_GO:0008152 metabolic process	-11.315	2.7635	8.20284	18896	306	1229	55	4.47518	0.589777	814913|816389|816925|817252|817576|818311|818985|819028|819606|819745|820510|821913|822178|824105|824518|824712|826873|827077|827792|827859|828163|828333|829145|829285|829866|830322|830725|831092|831541|831658|832138|834235|835215|835279|836541|836548|837246|837433|837506|837560|837599|838230|838283|838714|838997|839146|839262|839371|839526|839567|841576|841976|844021|844055|844433	EMB2816|AT2G18740|SNRNP-G|SE|U2B''|RS2Z33|LSM6B|AT2G44200|AT3G04500|AT3G05760|EMB2769|AT3G23325|AT3G25840|SR34a|RS2Z32|SCL30|AT4G12600|AT4G14342|smB|AT4G21110|AT4G02840|AT4G22380|RUXF|RSZ22|SMP2|BTR1L|YLS8|AT5G12190|DOT2|AT5G17900|AT5G20160|UBL5|AT5G51410|RS41|SC35|AT5G64270|SR45a|SR30|CDC5|MAGO|AT1G10580|SR45|AT1G17130|LSM3A|RSZ21|AT1G25682|SR34|AT1G03910|LSM2|AT1G03140|Y14|SCL33|LSM3B|SKIP|AT1G…	-10.1928	8	27	0	0	0	-15.0012	7.96933	0.49147
0	1	1	0	1	1	1	0	1	0	-9.96983	-14.6923	0	-4.82687	-12.8303	-2.05618	0	-2.80075	ath03040	M011011101	6	0.49147	KEGG Pathway	24	Spliceosome		-15.0012	3.7834	10.1972	18896	191	1229	47	3.82425	0.547054	814913|816187|816389|816925|817576|818311|818985|819669|819745|820510|821343|821913|824105|824518|824712|825459|826873|827077|827792|827859|828163|828253|828333|829145|829285|829866|830725|831092|831541|832138|835279|836117|836541|836548|837433|837506|837560|837599|838714|838997|839262|839526|839567|841576|841976|844021|844055	EMB2816|AT2G16860|AT2G18740|SNRNP-G|U2B''|RS2Z33|LSM6B|AT3G05070|AT3G05760|EMB2769|MOS4|AT3G23325|SR34a|RS2Z32|SCL30|AT3G62840|AT4G12600|AT4G14342|smB|AT4G21110|AT4G02840|AT4G21660|AT4G22380|RUXF|RSZ22|SMP2|YLS8|AT5G12190|DOT2|AT5G20160|RS41|AT5G59950|SC35|AT5G64270|SR30|CDC5|MAGO|AT1G10580|LSM3A|RSZ21|SR34|LSM2|AT1G03140|Y14|SCL33|LSM3B|SKIP	-13.5933	8	27	1	1	1	-15.0012	7.96933	0.49147
0	1	1	0	1	1	1	0	1	0	-9.96983	-14.6923	0	-4.82687	-12.8303	-2.05618	0	-2.80075	ko03040	M011011101	6	0.49147	KEGG Pathway	24	Spliceosome		-15.0012	3.7834	10.1972	18896	191	1229	47	3.82425	0.547054	814913|816187|816389|816925|817576|818311|818985|819669|819745|820510|821343|821913|824105|824518|824712|825459|826873|827077|827792|827859|828163|828253|828333|829145|829285|829866|830725|831092|831541|832138|835279|836117|836541|836548|837433|837506|837560|837599|838714|838997|839262|839526|839567|841576|841976|844021|844055	EMB2816|AT2G16860|AT2G18740|SNRNP-G|U2B''|RS2Z33|LSM6B|AT3G05070|AT3G05760|EMB2769|MOS4|AT3G23325|SR34a|RS2Z32|SCL30|AT3G62840|AT4G12600|AT4G14342|smB|AT4G21110|AT4G02840|AT4G21660|AT4G22380|RUXF|RSZ22|SMP2|YLS8|AT5G12190|DOT2|AT5G20160|RS41|AT5G59950|SC35|AT5G64270|SR30|CDC5|MAGO|AT1G10580|LSM3A|RSZ21|SR34|LSM2|AT1G03140|Y14|SCL33|LSM3B|SKIP	-13.5933	8	27	0	0	0	-15.0012	7.96933	0.49147
0	1	1	0	0	1	0	0	0	0	-6.09447	-8.2729	0	0	-6.4018	0	0	0	M00354	M011001000	3	0.460612	KEGG Structural Complexes	25	Spliceosome, U4/U6.U5 tri-snRNP		-7.93084	5.98808	8.11489	18896	49	966	15	1.5528	0.397805	814913|816389|816925|818985|825459|826873|827792|828163|828333|830725|831541|832138|838714|839526|844021	EMB2816|AT2G18740|SNRNP-G|LSM6B|AT3G62840|AT4G12600|smB|AT4G02840|AT4G22380|YLS8|DOT2|AT5G20160|LSM3A|LSM2|LSM3B	-7.0565	9	27	0	0	0	-15.0012	7.96933	0.49147
0	1	1	0	0	1	0	0	0	0	-6.09447	-8.2729	0	0	-6.4018	0	0	0	ath_M00354	M011001000	3	0.460612	KEGG Structural Complexes	25	Spliceosome, U4/U6.U5 tri-snRNP		-7.93084	5.98808	8.11489	18896	49	966	15	1.5528	0.397805	814913|816389|816925|818985|825459|826873|827792|828163|828333|830725|831541|832138|838714|839526|844021	EMB2816|AT2G18740|SNRNP-G|LSM6B|AT3G62840|AT4G12600|smB|AT4G02840|AT4G22380|YLS8|DOT2|AT5G20160|LSM3A|LSM2|LSM3B	-7.0565	9	27	0	0	0	-15.0012	7.96933	0.49147
0	1	1	0	0	1	0	0	1	0	-7.78094	-8.02269	0	0	-7.98775	0	0	-2.13011	GO:0097526	M011001001	4	0.458121	GO Cellular Components	20	spliceosomal tri-snRNP complex		-9.70874	7.72148	9.62677	18896	38	966	15	1.5528	0.397805	814913|816389|816925|818985|826873|827792|828163|828333|830725|831541|832138|838714|839526|839567|844021	EMB2816|AT2G18740|SNRNP-G|LSM6B|AT4G12600|smB|AT4G02840|AT4G22380|YLS8|DOT2|AT5G20160|LSM3A|LSM2|AT1G03140|LSM3B	-8.70022	9	27	0	0	0	-15.0012	7.96933	0.49147
0	1	1	0	0	1	0	0	0	0	-6.22723	-7.98309	0	0	-6.33885	0	0	0	GO:0120114	M011001000	3	0.455368	GO Cellular Components	20	Sm-like protein family complex		-8.22089	4.01849	7.48563	18896	88	1229	23	1.87144	0.386554	814913|816389|816925|817576|818985|819745|821913|825459|826873|827077|827792|828163|828333|830725|831092|831541|832138|835215|836548|838714|839526|839567|844021	EMB2816|AT2G18740|SNRNP-G|U2B''|LSM6B|AT3G05760|AT3G23325|AT3G62840|AT4G12600|AT4G14342|smB|AT4G02840|AT4G22380|YLS8|AT5G12190|DOT2|AT5G20160|AT5G51410|AT5G64270|LSM3A|LSM2|AT1G03140|LSM3B	-7.31943	8	27	0	0	0	-15.0012	7.96933	0.49147
0	1	1	0	1	1	0	0	0	0	-6.75634	-7.78303	0	-5.44618	-6.8576	0	0	0	GO:0006397	M011011000	4	0.423351	GO Biological Processes	19	mRNA processing	19_GO:0008152 metabolic process	-10.1964	2.6191	7.66762	18896	317	1229	54	4.39382	0.584639	814913|816197|816389|816925|817252|817576|818311|818985|819028|819606|819745|820510|821913|822178|824105|824518|824712|826873|827077|827792|827859|828163|828333|829145|829285|829866|830626|830725|830853|831092|831541|831658|832138|834235|835215|835279|836300|836541|836548|837246|837433|837506|837599|838230|838714|838997|839262|839371|839526|839567|841976|844021|844055|844433	EMB2816|AT2G16940|AT2G18740|SNRNP-G|SE|U2B''|RS2Z33|LSM6B|AT2G44200|AT3G04500|AT3G05760|EMB2769|AT3G23325|AT3G25840|SR34a|RS2Z32|SCL30|AT4G12600|AT4G14342|smB|AT4G21110|AT4G02840|AT4G22380|RUXF|RSZ22|SMP2|Tudor1|YLS8|NRPB4|AT5G12190|DOT2|AT5G17900|AT5G20160|UBL5|AT5G51410|RS41|Tudor2|SC35|AT5G64270|SR45a|SR30|CDC5|AT1G10580|SR45|LSM3A|RSZ21|SR34|AT1G03910|LSM2|AT1G03140|SCL33|LSM3B|SKIP|AT1G80930	-9.14812	8	27	0	0	0	-15.0012	7.96933	0.49147
0	1	1	0	1	1	1	0	1	0	-7.18108	-9.9063	0	-6.15536	-8.80049	-2.37911	0	-2.15926	GO:0000375	M011011101	6	0.423232	GO Biological Processes	19	RNA splicing, via transesterification reactions	19_GO:0008152 metabolic process	-11.9265	3.03856	8.60981	18896	253	1229	50	4.06835	0.563526	814913|816389|816925|817252|817576|818311|818985|819028|819606|819745|820510|821913|822178|824105|824518|824712|826873|827077|827792|827859|828163|828333|829145|829285|829866|830725|831092|831541|831658|832138|834235|835215|835279|836541|836548|837246|837433|837506|837599|838230|838714|838997|839262|839371|839526|839567|841976|844021|844055|844433	EMB2816|AT2G18740|SNRNP-G|SE|U2B''|RS2Z33|LSM6B|AT2G44200|AT3G04500|AT3G05760|EMB2769|AT3G23325|AT3G25840|SR34a|RS2Z32|SCL30|AT4G12600|AT4G14342|smB|AT4G21110|AT4G02840|AT4G22380|RUXF|RSZ22|SMP2|YLS8|AT5G12190|DOT2|AT5G17900|AT5G20160|UBL5|AT5G51410|RS41|SC35|AT5G64270|SR45a|SR30|CDC5|AT1G10580|SR45|LSM3A|RSZ21|SR34|AT1G03910|LSM2|AT1G03140|SCL33|LSM3B|SKIP|AT1G80930	-10.7605	8	27	0	0	0	-15.0012	7.96933	0.49147
0	1	1	0	1	1	0	0	1	0	-7.2984	-13.4854	0	-5.60431	-10.0834	0	0	-2.93952	GO:0005681	M011011001	5	0.4832	GO Cellular Components	20	spliceosomal complex		-12.3156	3.12111	8.71265	18896	150	1897	47	2.4776	0.35689	814913|816187|816366|816389|816925|817909|819028|819377|819669|819745|819970|820510|821343|821412|821913|823865|825359|826873|827077|827792|827859|828163|828333|829866|830725|831092|831658|832138|832986|834293|835215|835279|836548|837228|837246|837506|837599|838086|838283|838714|839146|839371|839526|839567|840246|844021|844433	EMB2816|AT2G16860|emb2444|AT2G18740|SNRNP-G|AT2G33435|AT2G44200|AT2G47640|AT3G05070|AT3G05760|AT3G07790|EMB2769|MOS4|AT3G18790|AT3G23325|AT3G47120|RS31|AT4G12600|AT4G14342|smB|AT4G21110|AT4G02840|AT4G22380|SMP2|YLS8|AT5G12190|AT5G17900|AT5G20160|AT5G28740|U2AF35B|AT5G51410|RS41|AT5G64270|AT1G07170|SR45a|CDC5|AT1G10580|AT1G15200|AT1G17130|LSM3A|AT1G25682|AT1G03910|LSM2|AT1G03140|MOS2|LSM3B|AT1G809…	-11.1246	6	27	0	0	0	-15.0012	7.96933	0.49147
0	1	1	0	0	1	0	0	0	0	-6.49839	-7.72662	0	0	-6.58867	0	0	0	GO:0030532	M011001000	3	0.453079	GO Cellular Components	20	small nuclear ribonucleoprotein complex		-8.53906	4.16032	7.70199	18896	85	1229	23	1.87144	0.386554	814913|816389|816925|817576|818985|819745|821913|825459|826873|827077|827792|828163|828333|830725|831092|831541|832138|835215|836548|838714|839526|839567|844021	EMB2816|AT2G18740|SNRNP-G|U2B''|LSM6B|AT3G05760|AT3G23325|AT3G62840|AT4G12600|AT4G14342|smB|AT4G02840|AT4G22380|YLS8|AT5G12190|DOT2|AT5G20160|AT5G51410|AT5G64270|LSM3A|LSM2|AT1G03140|LSM3B	-7.61865	8	27	0	0	0	-15.0012	7.96933	0.49147
0	1	1	0	0	1	0	0	0	0	-6.02118	-6.99593	0	0	-6.92698	0	0	0	GO:0071011	M011001000	3	0.443749	GO Cellular Components	20	precatalytic spliceosome		-7.44271	7.96933	8.41144	18896	27	966	11	1.13872	0.341375	816389|816925|826873|827077|828163|828333|831092|832138|838714|839526|844021	AT2G18740|SNRNP-G|AT4G12600|AT4G14342|AT4G02840|AT4G22380|AT5G12190|AT5G20160|LSM3A|LSM2|LSM3B	-6.60526	9	27	0	0	0	-15.0012	7.96933	0.49147
0	1	1	0	0	1	0	0	0	0	-5.94447	-7.22158	0	0	-5.98755	0	0	0	GO:0097525	M011001000	3	0.439415	GO Cellular Components	20	spliceosomal snRNP complex		-7.91002	4.02681	7.3329	18896	84	1229	22	1.79007	0.378214	814913|816389|816925|817576|818985|819745|821913|826873|827077|827792|828163|828333|830725|831092|831541|832138|835215|836548|838714|839526|839567|844021	EMB2816|AT2G18740|SNRNP-G|U2B''|LSM6B|AT3G05760|AT3G23325|AT4G12600|AT4G14342|smB|AT4G02840|AT4G22380|YLS8|AT5G12190|DOT2|AT5G20160|AT5G51410|AT5G64270|LSM3A|LSM2|AT1G03140|LSM3B	-7.0375	8	27	0	0	0	-15.0012	7.96933	0.49147
0	1	1	0	1	1	1	0	1	0	-8.06693	-11.474	0	-7.42007	-10.2231	-2.94194	0	-2.84717	GO:0000398	M011011101	6	0.426683	GO Biological Processes	19	mRNA splicing, via spliceosome	19_GO:0008152 metabolic process	-13.7642	3.37173	9.50282	18896	228	1229	50	4.06835	0.563526	814913|816389|816925|817252|817576|818311|818985|819028|819606|819745|820510|821913|822178|824105|824518|824712|826873|827077|827792|827859|828163|828333|829145|829285|829866|830725|831092|831541|831658|832138|834235|835215|835279|836541|836548|837246|837433|837506|837599|838230|838714|838997|839262|839371|839526|839567|841976|844021|844055|844433	EMB2816|AT2G18740|SNRNP-G|SE|U2B''|RS2Z33|LSM6B|AT2G44200|AT3G04500|AT3G05760|EMB2769|AT3G23325|AT3G25840|SR34a|RS2Z32|SCL30|AT4G12600|AT4G14342|smB|AT4G21110|AT4G02840|AT4G22380|RUXF|RSZ22|SMP2|YLS8|AT5G12190|DOT2|AT5G17900|AT5G20160|UBL5|AT5G51410|RS41|SC35|AT5G64270|SR45a|SR30|CDC5|AT1G10580|SR45|LSM3A|RSZ21|SR34|AT1G03910|LSM2|AT1G03140|SCL33|LSM3B|SKIP|AT1G80930	-12.4482	8	27	0	0	0	-15.0012	7.96933	0.49147
0	1	1	0	0	1	0	0	1	0	-6.41457	-7.18064	0	0	-6.3741	0	0	-2.17406	GO:0046540	M011001001	4	0.432997	GO Cellular Components	20	U4/U6 x U5 tri-snRNP complex		-7.9605	7.82443	8.68278	18896	30	966	12	1.24224	0.356368	816389|818985|826873|827792|828333|830725|831541|832138|838714|839526|839567|844021	AT2G18740|LSM6B|AT4G12600|smB|AT4G22380|YLS8|DOT2|AT5G20160|LSM3A|LSM2|AT1G03140|LSM3B	-7.08278	9	27	0	0	0	-15.0012	7.96933	0.49147
0	1	1	0	1	1	0	0	0	0	-4.15263	-7.15504	0	-2.99514	-4.7815	0	0	0	GO:0016071	M011011000	4	0.408427	GO Biological Processes	19	mRNA metabolic process	19_GO:0008152 metabolic process	-6.14021	1.94246	5.43927	18896	467	1229	59	4.80065	0.609805	814913|816197|816389|816925|817252|817576|818311|818985|819028|819606|819745|820510|820548|821913|822178|824105|824518|824712|826873|827077|827792|827859|828163|828333|829145|829285|829557|829866|830626|830725|830853|831092|831541|831658|832138|834235|835215|835279|836300|836541|836548|837246|837433|837506|837599|838230|838387|838714|838997|839109|839262|839371|839526|839567|840295|841976|844021|…	EMB2816|AT2G16940|AT2G18740|SNRNP-G|SE|U2B''|RS2Z33|LSM6B|AT2G44200|AT3G04500|AT3G05760|EMB2769|ECT2|AT3G23325|AT3G25840|SR34a|RS2Z32|SCL30|AT4G12600|AT4G14342|smB|AT4G21110|AT4G02840|AT4G22380|RUXF|RSZ22|PAB2|SMP2|Tudor1|YLS8|NRPB4|AT5G12190|DOT2|AT5G17900|AT5G20160|UBL5|AT5G51410|RS41|Tudor2|SC35|AT5G64270|SR45a|SR30|CDC5|AT1G10580|SR45|AT1G18070|LSM3A|RSZ21|AT1G25260|SR34|AT1G03910|LSM2|AT1G03…	-5.4143	8	27	0	0	0	-15.0012	7.96933	0.49147
0	1	1	0	0	1	0	0	1	0	-3.70979	-7.30423	0	0	-5.34144	0	0	-2.80486	GO:0071013	M011001001	4	0.418185	GO Cellular Components	20	catalytic step 2 spliceosome		-7.57688	5.3047	7.68661	18896	59	966	16	1.65631	0.410635	814913|816187|816925|819970|820510|821343|827792|828163|831092|836548|837599|838086|838714|839526|844021|844433	EMB2816|AT2G16860|SNRNP-G|AT3G07790|EMB2769|MOS4|smB|AT4G02840|AT5G12190|AT5G64270|AT1G10580|AT1G15200|LSM3A|LSM2|LSM3B|AT1G80930	-6.73121	9	27	0	0	0	-15.0012	7.96933	0.49147
0	1	1	0	1	1	1	0	1	0	-7.18108	-9.9063	0	-6.15536	-8.80049	-2.37911	0	-2.15926	GO:0000377	M011011101	6	0.423232	GO Biological Processes	19	RNA splicing, via transesterification reactions with bulged adenosine as nucleophile	19_GO:0008152 metabolic process	-11.9265	3.03856	8.60981	18896	253	1229	50	4.06835	0.563526	814913|816389|816925|817252|817576|818311|818985|819028|819606|819745|820510|821913|822178|824105|824518|824712|826873|827077|827792|827859|828163|828333|829145|829285|829866|830725|831092|831541|831658|832138|834235|835215|835279|836541|836548|837246|837433|837506|837599|838230|838714|838997|839262|839371|839526|839567|841976|844021|844055|844433	EMB2816|AT2G18740|SNRNP-G|SE|U2B''|RS2Z33|LSM6B|AT2G44200|AT3G04500|AT3G05760|EMB2769|AT3G23325|AT3G25840|SR34a|RS2Z32|SCL30|AT4G12600|AT4G14342|smB|AT4G21110|AT4G02840|AT4G22380|RUXF|RSZ22|SMP2|YLS8|AT5G12190|DOT2|AT5G17900|AT5G20160|UBL5|AT5G51410|RS41|SC35|AT5G64270|SR45a|SR30|CDC5|AT1G10580|SR45|LSM3A|RSZ21|SR34|AT1G03910|LSM2|AT1G03140|SCL33|LSM3B|SKIP|AT1G80930	-10.7605	8	27	0	0	0	-15.0012	7.96933	0.49147
0	1	1	0	0	1	0	0	1	0	-2.85895	-5.8456	0	0	-5.12209	0	0	-4.80949	M00341	M011001001	4	0.387604	KEGG Structural Complexes	25	Proteasome, 19S regulatory particle (PA700)		-8.78185	13.4817	10.8856	18896	32	438	10	2.28311	0.713692	819718|829025|830019|830850|832121|834532|835941|839789|841812|842760	RPT5A|RPT2a|RPN10|EMB2107|RPT6A|DSS1(V)|RPT3|ATS9|RPT1A|RPN12a	-7.84091	12	28	1	1	1	-8.78185	54.771	0.387604	http://http://www.broadinstitute.org/gsea/msigdb/geneset_page.jsp?geneSetName=PA700
0	1	1	0	0	1	0	0	1	0	-2.85895	-5.8456	0	0	-5.12209	0	0	-4.80949	ath_M00341	M011001001	4	0.387604	KEGG Structural Complexes	25	Proteasome, 19S regulatory particle (PA700)		-8.78185	13.4817	10.8856	18896	32	438	10	2.28311	0.713692	819718|829025|830019|830850|832121|834532|835941|839789|841812|842760	RPT5A|RPT2a|RPN10|EMB2107|RPT6A|DSS1(V)|RPT3|ATS9|RPT1A|RPN12a	-7.84091	12	28	0	0	0	-8.78185	54.771	0.387604
0	1	1	0	0	1	0	0	1	0	-2.38026	-5.41105	0	0	-4.50396	0	0	-4.28957	GO:0005838	M011001001	4	0.371819	GO Cellular Components	20	proteasome regulatory particle		-7.78166	12.9425	10.084	18896	30	438	9	2.05479	0.677858	819718|829025|830019|832121|834532|835941|839789|841812|842760	RPT5A|RPT2a|RPN10|RPT6A|DSS1(V)|RPT3|ATS9|RPT1A|RPN12a	-6.91937	12	28	0	0	0	-8.78185	54.771	0.387604
0	1	1	0	0	1	0	0	1	0	-2.38026	-5.41105	0	0	-4.50396	0	0	-4.28957	GO:0022624	M011001001	4	0.371819	GO Cellular Components	20	proteasome accessory complex		-7.78166	12.9425	10.084	18896	30	438	9	2.05479	0.677858	819718|829025|830019|832121|834532|835941|839789|841812|842760	RPT5A|RPT2a|RPN10|RPT6A|DSS1(V)|RPT3|ATS9|RPT1A|RPN12a	-6.91937	12	28	0	0	0	-8.78185	54.771	0.387604
0	0	1	0	0	1	1	0	1	0	0	-3.17036	0	0	-2.79969	-2.25158	0	-3.07341	GO:0008540	M001001101	4	0.269375	GO Cellular Components	20	proteasome regulatory particle, base subcomplex		-6.00627	16.1781	9.35608	18896	16	438	6	1.36986	0.555401	819718|829025|830019|832121|835941|841812	RPT5A|RPT2a|RPN10|RPT6A|RPT3|RPT1A	-5.29087	12	28	0	0	0	-8.78185	54.771	0.387604
0	0	1	0	0	1	0	0	1	0	0	-2.008	0	0	-2.76203	0	0	-2.39195	GO:0036402	M001001001	3	0.223539	GO Molecular Functions	21	proteasome-activating ATPase activity		-4.89451	54.771	12.6553	18896	5	207	3	1.44928	0.830654	829025|832121|835941	RPT2a|RPT6A|RPT3	-4.29861	14	28	0	0	0	-8.78185	54.771	0.387604
0	0	1	0	0	0	0	0	0	0	0	-2.27266	0	0	0	0	0	0	GO:0008541	M001000000	1	0.110123	GO Cellular Components	20	proteasome regulatory particle, lid subcomplex		-2.63295	10.7854	5.22324	18896	12	438	3	0.684932	0.394089	834532|839789|842760	DSS1(V)|ATS9|RPN12a	-2.35898	12	28	0	0	0	-8.78185	54.771	0.387604
0	0	1	0	0	1	0	0	1	0	0	-5.0576	0	0	-2.79969	0	0	-3.07341	GO:0043248	M001001001	3	0.341917	GO Biological Processes	19	proteasome assembly	19_GO:0071840 cellular component organization or biogenesis	-4.63581	13.4817	7.694	18896	16	438	5	1.14155	0.507596	829025|830019|834532|839789|842760	RPT2a|RPN10|DSS1(V)|ATS9|RPN12a	-4.07006	12	28	0	0	0	-8.78185	54.771	0.387604
0	0	1	0	0	1	0	1	1	0	0	-4.16507	0	0	-2.43305	0	-2.18279	-2.86995	GO:2000144	M001001011	4	0.297869	GO Biological Processes	19	positive regulation of DNA-templated transcription, initiation	19_GO:0048518 positive regulation of biological process	-4.90488	9.78054	7.06215	18896	12	966	6	0.621118	0.252782	819718|826690|834211|834316|835941|841812	RPT5A|KELP|AT5G42060|RPT4A|RPT3|RPT1A	-4.30817	9	29	0	0	0	-4.90488	11.1778	0.297869
0	0	1	0	0	0	0	0	0	0	0	-2.64939	0	0	0	0	0	0	GO:2000142	M001000000	1	0.137672	GO Biological Processes	19	regulation of DNA-templated transcription, initiation	19_GO:0071840 cellular component organization or biogenesis	-3.5713	6.17718	5.24053	18896	19	966	6	0.621118	0.252782	819718|826690|834211|834316|835941|841812	RPT5A|KELP|AT5G42060|RPT4A|RPT3|RPT1A	-3.14902	9	29	0	0	0	-4.90488	11.1778	0.297869
0	0	1	0	0	1	0	0	0	0	0	-2.48606	0	0	-2.2558	0	0	0	GO:0045899	M001001000	2	0.183799	GO Biological Processes	19	positive regulation of RNA polymerase II transcriptional preinitiation complex assembly	19_GO:0048518 positive regulation of biological process	-3.67816	11.1778	6.25127	18896	7	966	4	0.414079	0.20661	819718|834316|835941|841812	RPT5A|RPT4A|RPT3|RPT1A	-3.24104	9	29	0	0	0	-4.90488	11.1778	0.297869
0	0	1	0	0	1	0	0	0	0	0	-2.48606	0	0	-2.2558	0	0	0	GO:0045898	M001001000	2	0.183799	GO Biological Processes	19	regulation of RNA polymerase II transcriptional preinitiation complex assembly	19_GO:0071840 cellular component organization or biogenesis	-3.67816	11.1778	6.25127	18896	7	966	4	0.414079	0.20661	819718|834316|835941|841812	RPT5A|RPT4A|RPT3|RPT1A	-3.24104	9	29	0	0	0	-4.90488	11.1778	0.297869
0	0	1	0	0	1	0	1	1	0	0	-4.16507	0	0	-2.43305	0	-2.18279	-2.86995	GO:0060260	M001001011	4	0.297869	GO Biological Processes	19	regulation of transcription initiation from RNA polymerase II promoter	19_GO:0071840 cellular component organization or biogenesis	-4.90488	9.78054	7.06215	18896	12	966	6	0.621118	0.252782	819718|826690|834211|834316|835941|841812	RPT5A|KELP|AT5G42060|RPT4A|RPT3|RPT1A	-4.30817	9	29	1	1	1	-4.90488	11.1778	0.297869
0	0	1	0	0	1	0	1	1	0	0	-4.16507	0	0	-2.43305	0	-2.18279	-2.86995	GO:0060261	M001001011	4	0.297869	GO Biological Processes	19	positive regulation of transcription initiation from RNA polymerase II promoter	19_GO:0048518 positive regulation of biological process	-4.90488	9.78054	7.06215	18896	12	966	6	0.621118	0.252782	819718|826690|834211|834316|835941|841812	RPT5A|KELP|AT5G42060|RPT4A|RPT3|RPT1A	-4.30817	9	29	0	0	0	-4.90488	11.1778	0.297869
0	0	0	0	1	0	1	0	0	0	0	0	0	-2.81771	0	-5.03396	0	0	ko04075	M000010100	2	0.323031	KEGG Pathway	24	Plant hormone signal transduction		-2.50999	2.01598	3.19817	18896	267	667	19	2.84858	0.644133	817087|818411|818982|819244|821625|822593|824214|831178|832607|834545|834768|835397|838310|838501|840158|841623|842385|843407|843834	EBF1|PYL4|MPK6|JAR1|EIN3|AHP2|SNRK2.2|AT5G13370|EBF2|NPR3|ERF2|RCAR3|JAZ5|JAZ1|MYC2|IAA18|SNRK2.10|TIFY7|TIFY10B	-2.2561	10	30	0	0	0	-6.54486	6.16308	0.348523
0	0	0	0	1	0	1	0	0	0	0	0	0	-2.81771	0	-5.03396	0	0	ath04075	M000010100	2	0.323031	KEGG Pathway	24	Plant hormone signal transduction		-2.50999	2.01598	3.19817	18896	267	667	19	2.84858	0.644133	817087|818411|818982|819244|821625|822593|824214|831178|832607|834545|834768|835397|838310|838501|840158|841623|842385|843407|843834	EBF1|PYL4|MPK6|JAR1|EIN3|AHP2|SNRK2.2|AT5G13370|EBF2|NPR3|ERF2|RCAR3|JAZ5|JAZ1|MYC2|IAA18|SNRK2.10|TIFY7|TIFY10B	-2.2561	10	30	0	0	0	-6.54486	6.16308	0.348523
0	0	1	0	1	1	1	1	1	0	0	-3.11869	0	-5.77716	-3.05703	-7.08975	-2.77892	-3.32766	GO:0071395	M001011111	6	0.344873	GO Biological Processes	19	cellular response to jasmonic acid stimulus	19_GO:0050896 response to stimulus	-6.35272	5.25202	7.04535	18896	115	438	14	3.19635	0.840496	818982|819244|824405|825648|828151|834545|836163|836865|838310|838501|840115|840158|843407|843834	MPK6|JAR1|SYP122|CUL1|MPK4|NPR3|SIZ1|MYBR1|JAZ5|JAZ1|RCD1|MYC2|TIFY7|TIFY10B	-5.6093	12	30	0	0	0	-6.54486	6.16308	0.348523
0	0	1	0	1	1	1	1	1	0	0	-3.35266	0	-6.06941	-3.22792	-7.36779	-2.904	-3.5363	GO:0009867	M001011111	6	0.348523	GO Biological Processes	19	jasmonic acid mediated signaling pathway	19_GO:0023052 signaling	-6.54486	5.44128	7.22906	18896	111	438	14	3.19635	0.840496	818982|819244|824405|825648|828151|834545|836163|836865|838310|838501|840115|840158|843407|843834	MPK6|JAR1|SYP122|CUL1|MPK4|NPR3|SIZ1|MYBR1|JAZ5|JAZ1|RCD1|MYC2|TIFY7|TIFY10B	-5.78155	12	30	1	1	1	-6.54486	6.16308	0.348523
0	0	0	0	1	1	1	0	0	0	0	0	0	-2.60439	-3.99188	-3.92818	0	0	GO:2000022	M000011100	3	0.322227	GO Biological Processes	19	regulation of jasmonic acid mediated signaling pathway	19_GO:0023052 signaling	-3.41154	6.16308	5.16	18896	42	438	6	1.36986	0.555401	834545|836865|838310|838501|843407|843834	NPR3|MYBR1|JAZ5|JAZ1|TIFY7|TIFY10B	-3.01257	12	30	0	0	0	-6.54486	6.16308	0.348523
0	1	1	0	1	1	1	1	1	0	-2.74851	-3.45434	0	-5.37456	-2.94243	-6.21562	-3.96189	-5.31303	ath04016	M011011111	7	0.278622	KEGG Pathway	24	MAPK signaling pathway - plant		-9.81515	3.01146	7.65781	18896	129	1897	39	2.05588	0.325802	817087|817245|817575|818411|818429|818710|818982|821400|821625|822119|823492|824214|826515|826702|826730|827923|828151|829541|829661|830427|832245|832607|833756|834509|834842|835397|835809|836451|837082|837637|838652|839324|840158|840957|842385|842959|843609|843685|843708	EBF1|CAM5|WRKY25|PYL4|WRKY33|CAM2|MPK6|MKS1|EIN3|AGC2-1|CAM7|SNRK2.2|NDPK1|NDPK3|ACS6|PYL7|MPK4|OST1|CAT2|PYL5|CAM6|EBF2|CAM1|RAN1|RBOHD|RCAR3|ABI2|NDPK2|ACS2|SNRK2.4|CAT1|MAPKKK18|MYC2|VIP1|SNRK2.10|CAM4|HAB1|MKK9|EIL3	-8.7951	6	31	1	1	1	-9.81515	3.01146	0.278622
0	0	1	0	0	0	0	0	1	0	0	-2.008	0	0	0	0	0	-2.39195	GO:0004108	M001000001	2	0.167482	GO Molecular Functions	21	citrate (Si)-synthase activity		-2.90927	11.7366	5.57312	18896	5	966	3	0.310559	0.179023	818879|819042|825044	CSY3|ATCS|CSY2	-2.5916	9	32	0	0	0	-5.53235	11.7366	0.280721
0	0	1	0	0	0	0	0	1	0	0	-2.008	0	0	0	0	0	-2.39195	GO:0036440	M001000001	2	0.167482	GO Molecular Functions	21	citrate synthase activity		-2.90927	11.7366	5.57312	18896	5	966	3	0.310559	0.179023	818879|819042|825044	CSY3|ATCS|CSY2	-2.5916	9	32	0	0	0	-5.53235	11.7366	0.280721
0	1	1	0	1	0	0	0	1	0	-2.01624	-3.13118	0	-2.41887	0	0	0	-2.61675	ko01210	M011010001	4	0.252166	KEGG Pathway	24	2-Oxocarboxylic acid metabolism		-5.53235	2.9883	5.56733	18896	70	1897	21	1.10701	0.240229	815120|816218|817648|817738|818879|818911|819042|824015|824130|825030|825044|826975|828805|829277|829679|831024|831169|832075|838046|838940|842905	ACO3|IDH2|ASP1|AT2G31810|CSY3|AT2G43090|ATCS|CSR1|BCAT3|AT3G58610|CSY2|IIL1|ACO2|CYP83B1|IDH1|ASP3|AK-LYS1|ASP2|AT1G14810|GGT1|cICDH	-4.86619	6	32	0	0	0	-5.53235	11.7366	0.280721
0	1	1	0	1	0	0	0	1	0	-2.01624	-3.13118	0	-2.41887	0	0	0	-2.61675	ath01210	M011010001	4	0.252166	KEGG Pathway	24	2-Oxocarboxylic acid metabolism		-5.53235	2.9883	5.56733	18896	70	1897	21	1.10701	0.240229	815120|816218|817648|817738|818879|818911|819042|824015|824130|825030|825044|826975|828805|829277|829679|831024|831169|832075|838046|838940|842905	ACO3|IDH2|ASP1|AT2G31810|CSY3|AT2G43090|ATCS|CSR1|BCAT3|AT3G58610|CSY2|IIL1|ACO2|CYP83B1|IDH1|ASP3|AK-LYS1|ASP2|AT1G14810|GGT1|cICDH	-4.86619	6	32	0	0	1	-5.53235	11.7366	0.280721
0	0	1	0	0	0	0	0	1	0	0	-2.98097	0	0	0	0	0	-3.80953	ath_M00010	M001000001	2	0.276858	KEGG Pathway	24	Citrate cycle, first carbon oxidation, oxaloacetate => 2-oxoglutarate		-4.95656	8.05456	6.75425	18896	17	966	7	0.724638	0.272893	816218|818879|819042|825044|828805|829679|842905	IDH2|CSY3|ATCS|CSY2|ACO2|IDH1|cICDH	-4.35303	9	32	0	0	0	-5.53235	11.7366	0.280721
0	0	1	0	0	0	0	0	1	0	0	-2.98097	0	0	0	0	0	-3.80953	M00010	M001000001	2	0.276858	KEGG Pathway	24	Citrate cycle, first carbon oxidation, oxaloacetate => 2-oxoglutarate		-4.95656	8.05456	6.75425	18896	17	966	7	0.724638	0.272893	816218|818879|819042|825044|828805|829679|842905	IDH2|CSY3|ATCS|CSY2|ACO2|IDH1|cICDH	-4.35303	9	32	0	0	0	-5.53235	11.7366	0.280721
0	0	1	0	0	1	0	0	1	0	0	-3.61637	0	0	-2.54876	0	0	-2.7664	ath_M00012	M001001001	3	0.280721	KEGG Pathway	24	Glyoxylate cycle		-4.67229	4.9805	5.64405	18896	18	1897	9	0.474433	0.157769	815120|816808|818879|819042|823906|825044|828805|830825|841757	ACO3|PMDH1|CSY3|ATCS|MDH|CSY2|ACO2|PMDH2|mMDH1	-4.10111	6	32	0	0	0	-5.53235	11.7366	0.280721
0	0	1	0	0	1	0	0	1	0	0	-3.61637	0	0	-2.54876	0	0	-2.7664	M00012	M001001001	3	0.280721	KEGG Pathway	24	Glyoxylate cycle		-4.67229	4.9805	5.64405	18896	18	1897	9	0.474433	0.157769	815120|816808|818879|819042|823906|825044|828805|830825|841757	ACO3|PMDH1|CSY3|ATCS|MDH|CSY2|ACO2|PMDH2|mMDH1	-4.10111	6	32	1	1	0	-5.53235	11.7366	0.280721
0	1	0	0	0	0	0	1	0	0	-2.63033	0	0	0	0	0	-2.56833	0	GO:0005092	M010000010	2	0.204509	GO Molecular Functions	21	GDP-dissociation inhibitor activity		-4.48526	19.174	8.40058	18896	9	438	4	0.913242	0.454531	819016|825162|840582|844119	GDI1|GDI2|AT1G36730|AT1G77840	-3.93746	12	33	0	0	1	-4.48526	19.174	0.262985
0	1	0	0	0	0	0	0	0	0	-2.50067	0	0	0	0	0	0	0	GO:0001732	M010000000	1	0.127033	GO Biological Processes	19	formation of cytoplasmic translation initiation complex	19_GO:0071840 cellular component organization or biogenesis	-2.90927	11.7366	5.57312	18896	5	966	3	0.310559	0.179023	826746|840582|844119	EIF3A|AT1G36730|AT1G77840	-2.5916	9	33	0	0	0	-4.48526	19.174	0.262985
0	1	0	0	0	0	0	0	0	0	-2.02183	0	0	0	0	0	0	0	GO:0060589	M010000000	1	0.0906313	GO Molecular Functions	21	nucleoside-triphosphatase regulator activity		-2.96978	3.87789	4.19206	18896	89	438	8	1.82648	0.639835	814675|819016|820816|825162|830353|830613|840582|844119	STL2P|GDI1|PLDALPHA1|GDI2|AT5G04750|BAG3|AT1G36730|AT1G77840	-2.64209	12	33	0	0	0	-4.48526	19.174	0.262985
0	1	1	0	0	1	0	0	0	0	-2.16211	-2.09129	0	0	-3.44269	0	0	0	GO:0002183	M011001000	3	0.250512	GO Biological Processes	19	cytoplasmic translational initiation	19_GO:0008152 metabolic process	-3.71699	6.52036	5.43873	18896	18	966	6	0.621118	0.252782	819236|821267|826746|831063|840582|844119	TRIP-1|AT3G02200|EIF3A|AT5G11900|AT1G36730|AT1G77840	-3.27348	9	33	0	0	0	-4.48526	19.174	0.262985
0	1	0	0	0	1	0	0	0	0	-2.46574	0	0	0	-3.83618	0	0	0	GO:0002181	M010001000	2	0.262985	GO Biological Processes	19	cytoplasmic translation	19_GO:0008152 metabolic process	-3.8257	2.78939	4.4594	18896	79	1372	16	1.16618	0.28984	816087|816547|817318|819236|821267|826746|831063|834839|837850|838094|838320|838387|840582|841598|843569|844119	AT2G15910|AT2G20280|AT2G27720|TRIP-1|AT3G02200|EIF3A|AT5G11900|ERF1-1|ERF1-2|AT1G15270|DRG1|AT1G18070|AT1G36730|AT1G51730|P40|AT1G77840	-3.36672	7	33	1	1	0	-4.48526	19.174	0.262985
0	0	1	1	0	0	1	1	1	0	0	-6.68224	-13.0599	0	0	-2.52424	-6.66444	-4.39231	GO:0042175	M001100111	5	0.476365	GO Cellular Components	20	nuclear outer membrane-endoplasmic reticulum membrane network		-9.8968	2.71978	7.60507	18896	277	1229	49	3.98698	0.558099	814675|816256|816464|816666|817170|817694|818117|818264|818583|819114|819122|819959|820142|820249|824011|824901|825119|826300|826373|826724|826872|827774|828463|828859|829183|829345|829556|830945|831583|831867|832259|832802|833947|834205|834264|835015|835692|837737|838646|838792|839208|839331|840897|841265|841692|843300|843775|843982|843985	STL2P|AT2G17500|TAG1|UFD1|GP ALPHA 1|ADS2|DAD2|MEMB11|AT2G39960|SEC61 BETA|PVA12|p24beta2|CDC48|BZIP28|CYP94B3|AT3G57340|AT3G59500|AT4G21450|AT4G08230|BTI2|AT4G12590|BAM3|BTI1|PPI1|AT4G30600|AT4G32130|CER9|AT5G10780|AT5G17190|AT5G03345|TPR7|AT5G27430|SGR4|AT5G42000|AT5G42570|AT5G49540|emb2731|SEC22|DPMS1|p24delta5|VTI1B|AT1G01230|BZIP60|AT1G48440|AT1G52600|SBH1|DPMS2|HMG1|AT1G76520	-8.87116	8	34	0	0	0	-10.9381	2.83079	0.501286
0	0	1	1	0	0	1	1	1	0	0	-6.53545	-13.2508	0	0	-2.60597	-6.796	-4.54086	GO:0005789	M001100111	5	0.477103	GO Cellular Components	20	endoplasmic reticulum membrane		-10.1266	2.75963	7.72408	18896	273	1229	49	3.98698	0.558099	814675|816256|816464|816666|817170|817694|818117|818264|818583|819114|819122|819959|820142|820249|824011|824901|825119|826300|826373|826724|826872|827774|828463|828859|829183|829345|829556|830945|831583|831867|832259|832802|833947|834205|834264|835015|835692|837737|838646|838792|839208|839331|840897|841265|841692|843300|843775|843982|843985	STL2P|AT2G17500|TAG1|UFD1|GP ALPHA 1|ADS2|DAD2|MEMB11|AT2G39960|SEC61 BETA|PVA12|p24beta2|CDC48|BZIP28|CYP94B3|AT3G57340|AT3G59500|AT4G21450|AT4G08230|BTI2|AT4G12590|BAM3|BTI1|PPI1|AT4G30600|AT4G32130|CER9|AT5G10780|AT5G17190|AT5G03345|TPR7|AT5G27430|SGR4|AT5G42000|AT5G42570|AT5G49540|emb2731|SEC22|DPMS1|p24delta5|VTI1B|AT1G01230|BZIP60|AT1G48440|AT1G52600|SBH1|DPMS2|HMG1|AT1G76520	-9.08422	8	34	0	0	0	-10.9381	2.83079	0.501286
0	0	1	1	0	0	1	1	1	0	0	-7.10243	-14.8858	0	0	-2.38418	-7.01692	-4.02427	GO:0044432	M001100111	5	0.501286	GO Cellular Components	20	endoplasmic reticulum part		-10.2499	2.62739	7.6945	18896	316	1229	54	4.39382	0.584639	814675|816256|816464|816633|816666|817170|817694|818117|818264|818583|819114|819122|819959|820142|820249|824011|824901|825119|825430|825434|826300|826373|826724|826872|827774|828463|828859|829183|829235|829345|829556|830945|831583|831867|832259|832802|833947|834205|834264|835015|835692|837737|838646|838792|839208|839305|839331|840897|841265|841692|843300|843775|843982|843985	STL2P|AT2G17500|TAG1|SYTA|UFD1|GP ALPHA 1|ADS2|DAD2|MEMB11|AT2G39960|SEC61 BETA|PVA12|p24beta2|CDC48|BZIP28|CYP94B3|AT3G57340|AT3G59500|AT3G62560|ATERDJ3B|AT4G21450|AT4G08230|BTI2|AT4G12590|BAM3|BTI1|PPI1|AT4G30600|AT4G31080|AT4G32130|CER9|AT5G10780|AT5G17190|AT5G03345|TPR7|AT5G27430|SGR4|AT5G42000|AT5G42570|AT5G49540|emb2731|SEC22|DPMS1|p24delta5|VTI1B|AT1G01910|AT1G01230|BZIP60|AT1G48440|AT1G52…	-9.1952	8	34	1	1	0	-10.9381	2.83079	0.501286
0	0	1	1	0	0	1	1	1	0	0	-6.68224	-14.5547	0	0	-2.8474	-7.77425	-4.73706	GO:0098827	M001100111	5	0.49071	GO Cellular Components	20	endoplasmic reticulum subcompartment		-10.9381	2.83079	8.09598	18896	277	1229	51	4.14972	0.568892	814675|816256|816464|816633|816666|817170|817694|818117|818264|818583|819114|819122|819959|820142|820249|824011|824901|825119|826300|826373|826724|826872|827774|828463|828859|829183|829235|829345|829556|830945|831583|831867|832259|832802|833947|834205|834264|835015|835692|837737|838646|838792|839208|839331|840897|841265|841692|843300|843775|843982|843985	STL2P|AT2G17500|TAG1|SYTA|UFD1|GP ALPHA 1|ADS2|DAD2|MEMB11|AT2G39960|SEC61 BETA|PVA12|p24beta2|CDC48|BZIP28|CYP94B3|AT3G57340|AT3G59500|AT4G21450|AT4G08230|BTI2|AT4G12590|BAM3|BTI1|PPI1|AT4G30600|AT4G31080|AT4G32130|CER9|AT5G10780|AT5G17190|AT5G03345|TPR7|AT5G27430|SGR4|AT5G42000|AT5G42570|AT5G49540|emb2731|SEC22|DPMS1|p24delta5|VTI1B|AT1G01230|BZIP60|AT1G48440|AT1G52600|SBH1|DPMS2|HMG1|AT1G76520	-9.84262	8	34	0	0	1	-10.9381	2.83079	0.501286
0	1	1	0	1	0	1	0	0	0	-4.62642	-9.14211	0	-4.68055	0	-2.56238	0	0	GO:0034613	M011010100	4	0.447882	GO Biological Processes	19	cellular protein localization	19_GO:0051179 localization	-11.5276	1.81036	7.56533	18896	656	2148	135	6.28492	0.523645	814747|814908|816246|816386|816605|816623|816633|816655|817014|817429|817874|817986|818240|818264|818317|818583|818594|818821|819114|819122|819206|819945|819959|819982|820001|820132|820142|820345|820355|820414|820418|821066|821248|821415|821856|821868|822024|823906|823935|824109|824352|824405|824451|824478|824539|824589|824597|824649|825376|825402|825430|825452|825654|826640|827494|827661|827706|…	AT2G02160|NMD3|AKR2B|SCY1|AT2G20760|PSB29|SYTA|AT2G21190|ARF3|ALB3|SAR1|AT2G34250|AT2G36680|MEMB11|TIM17-2|AT2G39960|CLC2|OEP16-3|SEC61 BETA|PVA12|ATI1|PEX13|p24beta2|AT3G07910|AT3G08530|SYP71|CDC48|ATFP8|SYP121|ITN1|AT3G12390|AT3G03160|PEX19-1|RAB7B|AT3G22845|ARFC1|SYP32|MDH|MAG1|NACA2|AT3G51890|SYP122|VSR1|VPS37-1|CHX20|SCR|VAMP727|ARA6|ROC4|ARFA1E|AT3G62560|AtATG18a|RMA1|AT4G10480|SYP23|ABCE2|…	-10.3889	5	35	0	0	0	-18.4453	2.88652	0.494614
1	1	1	0	1	0	0	0	0	-2.59622	-4.30377	-6.48902	0	-2.59726	0	0	0	0	GO:0072594	M111010000	4	0.388171	GO Biological Processes	19	establishment of protein localization to organelle	19_GO:0051179 localization	-9.30643	2.21657	6.99065	18896	254	2148	64	2.97952	0.366849	816246|816386|816623|817429|817986|818240|818264|818317|818583|818821|819114|819206|819945|819982|821248|823906|823935|824451|824478|824539|824597|825376|827934|828241|828571|829183|829663|829697|830273|830501|831546|831638|831703|832124|832368|832404|832536|832645|832786|832802|833947|834094|834184|834420|834750|835165|835612|835613|836402|837428|838327|839208|839248|839305|839620|839629|839690|…	AKR2B|SCY1|PSB29|ALB3|AT2G34250|AT2G36680|MEMB11|TIM17-2|AT2G39960|OEP16-3|SEC61 BETA|ATI1|PEX13|AT3G07910|PEX19-1|MDH|MAG1|VSR1|VPS37-1|CHX20|VAMP727|ROC4|TOC159|VPS28-1|NBR1|AT4G30600|AT4G35110|AKR2|CPSRP54|SNX1|SYP21|EMB1241|AT5G03030|RAN2|CDF1|MIA40|AT5G24650|PEX4|AT5G27280|AT5G27430|SGR4|TOM20-4|CIP1|TOM22-V|LON2|CLPC1|RAN3|MGE1|PEX14|SRC2|TIM23-1|VTI1B|TOC33|AT1G01910|NTF2A|TOM20-2|NTF2B|PE…	-8.32793	5	35	0	0	0	-18.4453	2.88652	0.494614
0	1	1	0	1	1	1	0	0	0	-5.6918	-9.1438	0	-5.20496	-2.32038	-2.56338	0	0	GO:0008104	M011011100	5	0.435035	GO Biological Processes	19	protein localization	19_GO:0051179 localization	-13.0337	1.8115	8.08198	18896	743	2148	153	7.12291	0.554965	814675|814747|814908|815211|816246|816386|816605|816617|816623|816633|816655|817014|817429|817874|817986|818240|818264|818317|818583|818594|818821|819016|819114|819122|819206|819945|819959|819982|820001|820132|820142|820345|820355|820414|820418|821066|821248|821415|821856|821868|822024|823749|823906|823935|824109|824352|824405|824451|824478|824539|824589|824597|824649|825162|825376|825402|825430|…	STL2P|AT2G02160|NMD3|VPS2.1|AKR2B|SCY1|AT2G20760|SCAMP3|PSB29|SYTA|AT2G21190|ARF3|ALB3|SAR1|AT2G34250|AT2G36680|MEMB11|TIM17-2|AT2G39960|CLC2|OEP16-3|GDI1|SEC61 BETA|PVA12|ATI1|PEX13|p24beta2|AT3G07910|AT3G08530|SYP71|CDC48|ATFP8|SYP121|ITN1|AT3G12390|AT3G03160|PEX19-1|RAB7B|AT3G22845|ARFC1|SYP32|RABE1c|MDH|MAG1|NACA2|AT3G51890|SYP122|VSR1|VPS37-1|CHX20|SCR|VAMP727|ARA6|GDI2|ROC4|ARFA1E|AT3G62560…	-11.7899	5	35	0	0	0	-18.4453	2.88652	0.494614
0	1	1	0	1	1	1	0	1	0	-7.58385	-9.59976	0	-5.55304	-2.25046	-2.43982	0	-2.00147	GO:0042886	M011011101	6	0.436483	GO Biological Processes	19	amide transport	19_GO:0051179 localization	-14.2515	1.93785	8.58122	18896	631	2148	139	6.47114	0.530818	814675|814747|814908|815211|816246|816386|816605|816617|816623|816633|817014|817429|817912|817986|818034|818240|818264|818317|818583|818594|818821|819016|819114|819122|819206|819945|819959|819982|820001|820132|820142|820345|820355|820418|821248|821415|821856|821868|822024|823749|823906|823935|824109|824352|824405|824451|824478|824539|824597|824649|825162|825376|825402|825430|825654|826640|827494|…	STL2P|AT2G02160|NMD3|VPS2.1|AKR2B|SCY1|AT2G20760|SCAMP3|PSB29|SYTA|ARF3|ALB3|GLTP1|AT2G34250|ACD11|AT2G36680|MEMB11|TIM17-2|AT2G39960|CLC2|OEP16-3|GDI1|SEC61 BETA|PVA12|ATI1|PEX13|p24beta2|AT3G07910|AT3G08530|SYP71|CDC48|ATFP8|SYP121|AT3G12390|PEX19-1|RAB7B|AT3G22845|ARFC1|SYP32|RABE1c|MDH|MAG1|NACA2|AT3G51890|SYP122|VSR1|VPS37-1|CHX20|VAMP727|ARA6|GDI2|ROC4|ARFA1E|AT3G62560|RMA1|AT4G10480|SYP23|…	-12.8874	5	35	0	0	0	-18.4453	2.88652	0.494614
0	1	1	0	1	0	1	0	1	0	-7.846	-13.843	0	-5.32245	0	-2.90289	0	-3.3201	GO:0051649	M011010101	5	0.494614	GO Biological Processes	19	establishment of localization in cell	19_GO:0051179 localization	-16.9689	1.96581	9.43545	18896	716	2148	160	7.44879	0.566522	814675|814747|814908|815211|816246|816386|816502|816605|816623|816633|817014|817306|817429|817986|818240|818264|818317|818583|818594|818821|819114|819122|819206|819666|819945|819959|819982|820001|820132|820142|820345|820352|820355|820418|820600|821066|821248|821415|821856|821868|822024|822138|823530|823906|823935|824109|824352|824405|824451|824478|824539|824597|824649|825119|825376|825402|825430|…	STL2P|AT2G02160|NMD3|VPS2.1|AKR2B|SCY1|SNF7.2|AT2G20760|PSB29|SYTA|ARF3|SKD1|ALB3|AT2G34250|AT2G36680|MEMB11|TIM17-2|AT2G39960|CLC2|OEP16-3|SEC61 BETA|PVA12|ATI1|HST|PEX13|p24beta2|AT3G07910|AT3G08530|SYP71|CDC48|ATFP8|AT3G11780|SYP121|AT3G12390|RHD3|AT3G03160|PEX19-1|RAB7B|AT3G22845|ARFC1|SYP32|ATL5|AT3G44100|MDH|MAG1|NACA2|AT3G51890|SYP122|VSR1|VPS37-1|CHX20|VAMP727|ARA6|AT3G59500|ROC4|ARFA1E|A…	-15.422	5	35	1	1	0	-18.4453	2.88652	0.494614
0	1	1	0	1	0	1	0	0	0	-7.20853	-9.88756	0	-5.11806	0	-2.80061	0	0	GO:0006886	M011010100	4	0.475415	GO Biological Processes	19	intracellular protein transport	19_GO:0051179 localization	-13.8691	2.03008	8.53016	18896	520	2148	120	5.58659	0.495534	814747|814908|816246|816386|816605|816623|816633|817014|817429|817986|818240|818264|818317|818583|818594|818821|819114|819122|819206|819945|819959|819982|820001|820132|820142|820345|820355|820418|821248|821415|821856|821868|822024|823906|823935|824109|824352|824405|824451|824478|824539|824597|824649|825376|825402|825430|825654|826640|827494|827661|827706|827864|827922|827934|828241|828571|829118|…	AT2G02160|NMD3|AKR2B|SCY1|AT2G20760|PSB29|SYTA|ARF3|ALB3|AT2G34250|AT2G36680|MEMB11|TIM17-2|AT2G39960|CLC2|OEP16-3|SEC61 BETA|PVA12|ATI1|PEX13|p24beta2|AT3G07910|AT3G08530|SYP71|CDC48|ATFP8|SYP121|AT3G12390|PEX19-1|RAB7B|AT3G22845|ARFC1|SYP32|MDH|MAG1|NACA2|AT3G51890|SYP122|VSR1|VPS37-1|CHX20|VAMP727|ARA6|ROC4|ARFA1E|AT3G62560|RMA1|AT4G10480|SYP23|ABCE2|ARA7|ZAC|AGY1|TOC159|VPS28-1|NBR1|AT4G29950…	-12.5411	5	35	0	0	0	-18.4453	2.88652	0.494614
1	1	1	0	1	0	0	0	0	-6.29481	-6.4019	-7.56838	0	-3.17029	0	0	0	0	GO:0006605	M111010000	4	0.431693	GO Biological Processes	19	protein targeting	19_GO:0051179 localization	-12.896	2.59198	8.58371	18896	224	2148	66	3.07263	0.372358	816246|816386|816623|816633|817429|817986|818240|818264|818317|818583|818821|819114|819122|819206|819945|819982|820132|820355|820418|821248|823906|823935|824109|824405|824451|824478|824539|824597|825376|826640|827922|827934|828571|829183|829697|830273|830501|831231|831546|831638|831703|832368|832404|832536|832645|832786|832802|833947|834094|834420|834750|835165|835613|836402|837428|838327|839208|…	AKR2B|SCY1|PSB29|SYTA|ALB3|AT2G34250|AT2G36680|MEMB11|TIM17-2|AT2G39960|OEP16-3|SEC61 BETA|PVA12|ATI1|PEX13|AT3G07910|SYP71|SYP121|AT3G12390|PEX19-1|MDH|MAG1|NACA2|SYP122|VSR1|VPS37-1|CHX20|VAMP727|ROC4|AT4G10480|AGY1|TOC159|NBR1|AT4G30600|AKR2|CPSRP54|SNX1|NACA3|SYP21|EMB1241|AT5G03030|CDF1|MIA40|AT5G24650|PEX4|AT5G27280|AT5G27430|SGR4|TOM20-4|TOM22-V|LON2|CLPC1|MGE1|PEX14|SRC2|TIM23-1|VTI1B|TOC…	-11.6614	5	35	0	0	0	-18.4453	2.88652	0.494614
0	1	1	0	1	1	1	0	0	0	-7.79587	-9.7256	0	-5.43988	-2.08994	-2.43578	0	0	GO:0015833	M011011100	5	0.463016	GO Biological Processes	19	peptide transport	19_GO:0051179 localization	-14.1498	1.94853	8.55718	18896	614	2148	136	6.33147	0.525451	814675|814747|814908|815211|816246|816386|816605|816617|816623|816633|817014|817429|817986|818240|818264|818317|818583|818594|818821|819016|819114|819122|819206|819945|819959|819982|820001|820132|820142|820345|820355|820418|821248|821415|821856|821868|822024|823749|823906|823935|824109|824352|824405|824451|824478|824539|824597|824649|825162|825376|825402|825430|825654|826640|827494|827661|827706|…	STL2P|AT2G02160|NMD3|VPS2.1|AKR2B|SCY1|AT2G20760|SCAMP3|PSB29|SYTA|ARF3|ALB3|AT2G34250|AT2G36680|MEMB11|TIM17-2|AT2G39960|CLC2|OEP16-3|GDI1|SEC61 BETA|PVA12|ATI1|PEX13|p24beta2|AT3G07910|AT3G08530|SYP71|CDC48|ATFP8|SYP121|AT3G12390|PEX19-1|RAB7B|AT3G22845|ARFC1|SYP32|RABE1c|MDH|MAG1|NACA2|AT3G51890|SYP122|VSR1|VPS37-1|CHX20|VAMP727|ARA6|GDI2|ROC4|ARFA1E|AT3G62560|RMA1|AT4G10480|SYP23|ABCE2|ARA7|Z…	-12.7968	5	35	0	0	0	-18.4453	2.88652	0.494614
0	1	1	0	1	0	1	0	0	0	-5.07274	-9.14561	0	-4.61558	0	-2.76626	0	0	GO:0070727	M011010100	4	0.449438	GO Biological Processes	19	cellular macromolecule localization	19_GO:0051179 localization	-12.6589	1.83059	7.972	18896	692	2148	144	6.70391	0.539608	814747|814908|816246|816386|816605|816623|816633|816655|817014|817429|817874|817986|818240|818264|818317|818583|818594|818821|819056|819114|819122|819206|819903|819945|819959|819982|820001|820132|820142|820345|820355|820414|820418|821066|821248|821313|821415|821856|821868|822024|823906|823935|824109|824352|824405|824451|824478|824539|824589|824597|824649|825376|825402|825430|825452|825654|826640|…	AT2G02160|NMD3|AKR2B|SCY1|AT2G20760|PSB29|SYTA|AT2G21190|ARF3|ALB3|SAR1|AT2G34250|AT2G36680|MEMB11|TIM17-2|AT2G39960|CLC2|OEP16-3|PEN2|SEC61 BETA|PVA12|ATI1|GSL10|PEX13|p24beta2|AT3G07910|AT3G08530|SYP71|CDC48|ATFP8|SYP121|ITN1|AT3G12390|AT3G03160|PEX19-1|UGP1|RAB7B|AT3G22845|ARFC1|SYP32|MDH|MAG1|NACA2|AT3G51890|SYP122|VSR1|VPS37-1|CHX20|SCR|VAMP727|ARA6|ROC4|ARFA1E|AT3G62560|AtATG18a|RMA1|AT4G10…	-11.4449	5	35	0	0	0	-18.4453	2.88652	0.494614
1	1	1	0	1	1	1	0	1	-2.19026	-9.17197	-13.8968	0	-5.55148	-2.45534	-3.50009	0	-3.50504	GO:0046907	M111011101	7	0.44094	GO Biological Processes	19	intracellular transport	19_GO:0051179 localization	-18.4453	2.04916	9.93303	18896	674	2148	157	7.30912	0.561609	814675|814747|814908|815211|816246|816386|816502|816605|816623|816633|817014|817306|817429|817986|818240|818264|818317|818583|818594|818821|819114|819122|819206|819666|819945|819959|819982|820001|820132|820142|820345|820352|820355|820418|820600|821066|821248|821415|821856|821868|822024|822138|823530|823906|823935|824109|824352|824405|824451|824478|824539|824597|824649|825119|825376|825402|825430|…	STL2P|AT2G02160|NMD3|VPS2.1|AKR2B|SCY1|SNF7.2|AT2G20760|PSB29|SYTA|ARF3|SKD1|ALB3|AT2G34250|AT2G36680|MEMB11|TIM17-2|AT2G39960|CLC2|OEP16-3|SEC61 BETA|PVA12|ATI1|HST|PEX13|p24beta2|AT3G07910|AT3G08530|SYP71|CDC48|ATFP8|AT3G11780|SYP121|AT3G12390|RHD3|AT3G03160|PEX19-1|RAB7B|AT3G22845|ARFC1|SYP32|ATL5|AT3G44100|MDH|MAG1|NACA2|AT3G51890|SYP122|VSR1|VPS37-1|CHX20|VAMP727|ARA6|AT3G59500|ROC4|ARFA1E|A…	-16.8383	5	35	0	0	1	-18.4453	2.88652	0.494614
0	1	1	0	1	1	1	0	1	0	-8.95273	-10.6648	0	-6.3813	-2.56383	-2.90365	0	-2.26861	GO:0015031	M011011101	6	0.447138	GO Biological Processes	19	protein transport	19_GO:0051179 localization	-16.2678	2.06275	9.30977	18896	580	2148	136	6.33147	0.525451	814675|814747|814908|815211|816246|816386|816605|816617|816623|816633|817014|817429|817986|818240|818264|818317|818583|818594|818821|819016|819114|819122|819206|819945|819959|819982|820001|820132|820142|820345|820355|820418|821248|821415|821856|821868|822024|823749|823906|823935|824109|824352|824405|824451|824478|824539|824597|824649|825162|825376|825402|825430|825654|826640|827494|827661|827706|…	STL2P|AT2G02160|NMD3|VPS2.1|AKR2B|SCY1|AT2G20760|SCAMP3|PSB29|SYTA|ARF3|ALB3|AT2G34250|AT2G36680|MEMB11|TIM17-2|AT2G39960|CLC2|OEP16-3|GDI1|SEC61 BETA|PVA12|ATI1|PEX13|p24beta2|AT3G07910|AT3G08530|SYP71|CDC48|ATFP8|SYP121|AT3G12390|PEX19-1|RAB7B|AT3G22845|ARFC1|SYP32|RABE1c|MDH|MAG1|NACA2|AT3G51890|SYP122|VSR1|VPS37-1|CHX20|VAMP727|ARA6|GDI2|ROC4|ARFA1E|AT3G62560|RMA1|AT4G10480|SYP23|ABCE2|ARA7|Z…	-14.7646	5	35	0	0	0	-18.4453	2.88652	0.494614
1	1	0	0	0	0	0	0	0	-3.09047	-3.91503	0	0	0	0	0	0	0	GO:0006612	M110000000	2	0.284516	GO Biological Processes	19	protein targeting to membrane	19_GO:0051179 localization	-5.3689	2.88652	5.41393	18896	64	2148	21	0.977654	0.212296	816386|816623|816633|817429|817986|818240|819114|820132|820355|820418|821248|824109|824405|824478|826640|829183|830273|831231|839305|843093|28721282	SCY1|PSB29|SYTA|ALB3|AT2G34250|AT2G36680|SEC61 BETA|SYP71|SYP121|AT3G12390|PEX19-1|NACA2|SYP122|VPS37-1|AT4G10480|AT4G30600|CPSRP54|NACA3|AT1G01910|AT1G67680|AT5G60460	-4.72072	5	35	0	0	0	-18.4453	2.88652	0.494614
1	1	1	0	0	0	0	0	0	-2.25505	-4.71776	-3.23095	0	0	0	0	0	0	GO:0090150	M111000000	3	0.330157	GO Biological Processes	19	establishment of protein localization to membrane	19_GO:0051179 localization	-5.38429	2.46317	5.25376	18896	100	2148	28	1.30354	0.244735	816386|816623|816633|817429|817986|818240|818821|819114|819982|820132|820355|820418|821248|824109|824405|824478|826640|829183|830273|831231|832536|834094|835297|839305|839629|842453|843093|28721282	SCY1|PSB29|SYTA|ALB3|AT2G34250|AT2G36680|OEP16-3|SEC61 BETA|AT3G07910|SYP71|SYP121|AT3G12390|PEX19-1|NACA2|SYP122|VPS37-1|AT4G10480|AT4G30600|CPSRP54|NACA3|AT5G24650|TOM20-4|GB1|AT1G01910|TOM20-2|TIM13|AT1G67680|AT5G60460	-4.73302	5	35	0	0	0	-18.4453	2.88652	0.494614
0	1	1	0	1	0	0	0	0	0	-4.06342	-3.51138	0	-2.35143	0	0	0	0	GO:0072657	M011010000	3	0.313817	GO Biological Processes	19	protein localization to membrane	19_GO:0051179 localization	-4.49294	2.13053	4.59607	18896	128	2148	31	1.4432	0.25733	816386|816623|816633|817429|817874|817986|818240|818821|819114|819982|820132|820355|820418|821248|821868|824109|824405|824478|826640|829183|830273|831231|832536|834094|835297|839305|839419|839629|842453|843093|28721282	SCY1|PSB29|SYTA|ALB3|SAR1|AT2G34250|AT2G36680|OEP16-3|SEC61 BETA|AT3G07910|SYP71|SYP121|AT3G12390|PEX19-1|ARFC1|NACA2|SYP122|VPS37-1|AT4G10480|AT4G30600|CPSRP54|NACA3|AT5G24650|TOM20-4|GB1|AT1G01910|VAMP721|TOM20-2|TIM13|AT1G67680|AT5G60460	-3.94341	5	35	0	0	0	-18.4453	2.88652	0.494614
0	1	1	0	1	1	1	0	1	0	-8.8793	-10.7538	0	-6.63886	-2.38798	-3.22744	0	-2.08026	GO:0045184	M011011101	6	0.451313	GO Biological Processes	19	establishment of protein localization	19_GO:0051179 localization	-15.8806	2.0358	9.17005	18896	592	2148	137	6.37803	0.527248	814675|814747|814908|815211|816246|816386|816605|816617|816623|816633|817014|817429|817986|818240|818264|818317|818583|818594|818821|819016|819114|819122|819206|819945|819959|819982|820001|820132|820142|820345|820355|820418|821248|821415|821856|821868|822024|823749|823906|823935|824109|824352|824405|824451|824478|824539|824597|824649|825162|825376|825402|825430|825654|826640|827494|827661|827706|…	STL2P|AT2G02160|NMD3|VPS2.1|AKR2B|SCY1|AT2G20760|SCAMP3|PSB29|SYTA|ARF3|ALB3|AT2G34250|AT2G36680|MEMB11|TIM17-2|AT2G39960|CLC2|OEP16-3|GDI1|SEC61 BETA|PVA12|ATI1|PEX13|p24beta2|AT3G07910|AT3G08530|SYP71|CDC48|ATFP8|SYP121|AT3G12390|PEX19-1|RAB7B|AT3G22845|ARFC1|SYP32|RABE1c|MDH|MAG1|NACA2|AT3G51890|SYP122|VSR1|VPS37-1|CHX20|VAMP727|ARA6|GDI2|ROC4|ARFA1E|AT3G62560|RMA1|AT4G10480|SYP23|ABCE2|ARA7|Z…	-14.4051	5	35	0	0	0	-18.4453	2.88652	0.494614
0	1	1	0	1	0	0	0	0	0	-3.692	-7.45345	0	-2.45592	0	0	0	0	GO:0033365	M011010000	3	0.417223	GO Biological Processes	19	protein localization to organelle	19_GO:0051179 localization	-9.97201	2.14845	7.21717	18896	303	2148	74	3.44507	0.393522	816246|816386|816623|816655|817429|817986|818240|818264|818317|818583|818821|819114|819206|819945|819982|821066|821248|821868|823906|823935|824451|824478|824539|824589|824597|825376|827934|828241|828571|829183|829663|829697|830034|830273|830501|831546|831583|831638|831703|832124|832368|832404|832536|832645|832786|832802|833947|834094|834184|834264|834420|834750|835165|835297|835612|835613|836402|…	AKR2B|SCY1|PSB29|AT2G21190|ALB3|AT2G34250|AT2G36680|MEMB11|TIM17-2|AT2G39960|OEP16-3|SEC61 BETA|ATI1|PEX13|AT3G07910|AT3G03160|PEX19-1|ARFC1|MDH|MAG1|VSR1|VPS37-1|CHX20|SCR|VAMP727|ROC4|TOC159|VPS28-1|NBR1|AT4G30600|AT4G35110|AKR2|AT4G38790|CPSRP54|SNX1|SYP21|AT5G17190|EMB1241|AT5G03030|RAN2|CDF1|MIA40|AT5G24650|PEX4|AT5G27280|AT5G27430|SGR4|TOM20-4|CIP1|AT5G42570|TOM22-V|LON2|CLPC1|GB1|RAN3|MGE1…	-8.94026	5	35	0	0	0	-18.4453	2.88652	0.494614
0	1	0	0	0	0	0	0	1	0	-2.46469	0	0	0	0	0	0	-2.27794	GO:0005771	M010000001	2	0.183426	GO Cellular Components	20	multivesicular body		-5.11772	7.11312	6.65908	18896	22	966	8	0.828157	0.291583	816502|817306|817546|823935|830501|830785|838349|843634	SNF7.2|SKD1|CYP5|MAG1|SNX1|VPS20.2|VPS46.1|VPS46.2	-4.49631	9	36	0	0	0	-9.23186	7.11312	0.386909
0	1	1	0	1	0	0	0	0	0	-2.62592	-2.46998	0	-6.63153	0	0	0	0	ath04144	M011010000	3	0.380375	KEGG Pathway	24	Endocytosis		-4.35697	2.49033	4.70163	18896	142	1229	23	1.87144	0.386554	816502|817306|820001|820419|820816|821415|823749|823935|824478|825402|827864|828241|830501|830785|834706|834718|835519|836105|838349|838801|838957|842251|843634	SNF7.2|SKD1|AT3G08530|ELC|PLDALPHA1|RAB7B|RABE1c|MAG1|VPS37-1|ARFA1E|ZAC|VPS28-1|SNX1|VPS20.2|AT5G46630|AGD9|AGD5|AT5G59840|VPS46.1|PIP5K1|ARF1|DL3|VPS46.2	-3.82696	8	36	0	0	0	-9.23186	7.11312	0.386909
0	1	0	0	0	0	0	0	0	0	-2.69059	0	0	0	0	0	0	0	ath_M00412	M010000000	1	0.140567	KEGG Structural Complexes	25	ESCRT-III complex		-2.34685	5.58888	3.98675	18896	14	966	4	0.414079	0.20661	816502|830785|838349|843634	SNF7.2|VPS20.2|VPS46.1|VPS46.2	-2.11808	9	36	0	0	0	-9.23186	7.11312	0.386909
0	1	0	0	0	0	0	0	0	0	-2.69059	0	0	0	0	0	0	0	M00412	M010000000	1	0.140567	KEGG Structural Complexes	25	ESCRT-III complex		-2.34685	5.58888	3.98675	18896	14	966	4	0.414079	0.20661	816502|830785|838349|843634	SNF7.2|VPS20.2|VPS46.1|VPS46.2	-2.11808	9	36	0	0	0	-9.23186	7.11312	0.386909
0	0	0	0	1	0	0	0	0	0	0	0	0	-2.11666	0	0	0	0	GO:0016197	M000010000	1	0.098114	GO Biological Processes	19	endosomal transport	19_GO:0051179 localization	-2.69123	2.91956	3.65341	18896	67	966	10	1.0352	0.325659	816502|817306|818264|823935|828241|830785|833947|838349|839208|843634	SNF7.2|SKD1|MEMB11|MAG1|VPS28-1|VPS20.2|SGR4|VPS46.1|VTI1B|VPS46.2	-2.40756	9	36	0	0	0	-9.23186	7.11312	0.386909
0	1	1	0	1	0	0	0	0	0	-2.62592	-2.46998	0	-6.63153	0	0	0	0	ko04144	M011010000	3	0.380375	KEGG Pathway	24	Endocytosis		-4.35697	2.49033	4.70163	18896	142	1229	23	1.87144	0.386554	816502|817306|820001|820419|820816|821415|823749|823935|824478|825402|827864|828241|830501|830785|834706|834718|835519|836105|838349|838801|838957|842251|843634	SNF7.2|SKD1|AT3G08530|ELC|PLDALPHA1|RAB7B|RABE1c|MAG1|VPS37-1|ARFA1E|ZAC|VPS28-1|SNX1|VPS20.2|AT5G46630|AGD9|AGD5|AT5G59840|VPS46.1|PIP5K1|ARF1|DL3|VPS46.2	-3.82696	8	36	0	0	0	-9.23186	7.11312	0.386909
0	1	1	0	1	0	1	0	0	0	-4.30917	-2.34374	0	-5.4047	0	-2.81351	0	0	GO:0044440	M011010100	4	0.363644	GO Cellular Components	20	endosomal part		-6.89377	4.29389	6.93822	18896	82	966	18	1.86335	0.435086	816502|816617|818264|820419|821415|824478|824597|824649|828241|830785|833947|835414|838138|838193|838349|839208|840326|843634	SNF7.2|SCAMP3|MEMB11|ELC|RAB7B|VPS37-1|VAMP727|ARA6|VPS28-1|VPS20.2|SGR4|AT5G53330|AVP1|SYP51|VPS46.1|VTI1B|FAB1D|VPS46.2	-6.0988	9	36	0	0	0	-9.23186	7.11312	0.386909
0	1	1	0	1	0	1	0	0	0	-4.81022	-2.3933	0	-6.05126	0	-2.91317	0	0	GO:0010008	M011010100	4	0.386909	GO Cellular Components	20	endosome membrane		-7.43335	4.89027	7.4594	18896	68	966	17	1.75983	0.42305	816502|816617|818264|820419|821415|824478|824649|828241|830785|833947|835414|838138|838193|838349|839208|840326|843634	SNF7.2|SCAMP3|MEMB11|ELC|RAB7B|VPS37-1|ARA6|VPS28-1|VPS20.2|SGR4|AT5G53330|AVP1|SYP51|VPS46.1|VTI1B|FAB1D|VPS46.2	-6.59674	9	36	1	1	0	-9.23186	7.11312	0.386909
0	1	1	0	1	0	1	0	0	0	-4.55587	-3.31678	0	-4.01595	0	-3.32728	0	0	GO:0044433	M011010100	4	0.332441	GO Cellular Components	20	cytoplasmic vesicle part		-8.50026	3.28709	7.29161	18896	145	1229	31	2.52238	0.447282	816502|816605|816617|818264|818594|820001|820419|821415|824352|824478|824597|824649|825430|828241|829596|830383|830785|833947|835414|837737|838106|838138|838193|838349|839208|839378|839464|839943|840326|843440|843634	SNF7.2|AT2G20760|SCAMP3|MEMB11|CLC2|AT3G08530|ELC|RAB7B|AT3G51890|VPS37-1|VAMP727|ARA6|AT3G62560|VPS28-1|AT4G34450|AT5G05010|VPS20.2|SGR4|AT5G53330|SEC22|AT1G15370|AVP1|SYP51|VPS46.1|VTI1B|ABCI18|SCAMP4|AT1G30630|FAB1D|FAB1C|VPS46.2	-7.58391	8	36	0	0	0	-9.23186	7.11312	0.386909
1	1	0	0	1	0	0	0	0	-2.09959	-3.15333	0	0	-4.56051	0	0	0	0	GO:0045324	M110010000	3	0.321825	GO Biological Processes	19	late endosome to vacuole transport	19_GO:0051179 localization	-4.20807	4.89027	5.4229	18896	36	966	9	0.931677	0.309109	816502|821415|827706|828241|830785|831546|834730|838349|843634	SNF7.2|RAB7B|ARA7|VPS28-1|VPS20.2|SYP21|VAM3|VPS46.1|VPS46.2	-3.69819	9	36	0	0	0	-9.23186	7.11312	0.386909
0	0	1	1	0	0	1	0	1	0	0	-2.34121	-5.03984	0	0	-2.61116	0	-2.17085	GO:0005768	M001100101	4	0.3217	GO Cellular Components	20	endosome		-4.05545	1.9072	4.25665	18896	400	966	39	4.03727	0.633296	815154|816502|816617|817306|817546|817874|818264|820419|820735|821415|821965|823935|824451|824478|824597|824649|825458|827706|828241|829167|830501|830785|831546|831966|832188|833947|834730|835280|835414|835519|838138|838193|838349|839208|839419|839619|840326|842534|843634	FIP1|SNF7.2|SCAMP3|SKD1|CYP5|SAR1|MEMB11|ELC|RABA1g|RAB7B|GAE6|MAG1|VSR1|VPS37-1|VAMP727|ARA6|AUD1|ARA7|VPS28-1|GAE1|SNX1|VPS20.2|SYP21|PGSIP6|COPT5|SGR4|VAM3|AT5G52050|AT5G53330|AGD5|AVP1|SYP51|VPS46.1|VTI1B|VAMP721|AT1G27300|FAB1D|STM|VPS46.2	-3.56444	9	36	0	0	0	-9.23186	7.11312	0.386909
0	1	1	0	1	1	0	0	1	0	-2.05385	-2.07633	0	-3.01312	-2.68923	0	0	-4.44245	GO:0005770	M011011001	5	0.295048	GO Cellular Components	20	late endosome		-9.23186	5.86832	8.76663	18896	60	966	18	1.86335	0.435086	815154|816502|817306|817546|818264|820419|823935|824451|830501|830785|831546|832188|833947|834730|835280|838349|839208|843634	FIP1|SNF7.2|SKD1|CYP5|MEMB11|ELC|MAG1|VSR1|SNX1|VPS20.2|SYP21|COPT5|SGR4|VAM3|AT5G52050|VPS46.1|VTI1B|VPS46.2	-8.25954	9	36	0	0	1	-9.23186	7.11312	0.386909
0	1	0	0	1	0	0	0	0	0	-2.26119	0	0	-3.75378	0	0	0	0	GO:0032509	M010010000	2	0.252678	GO Biological Processes	19	endosome transport via multivesicular body sorting pathway	19_GO:0051179 localization	-2.18602	4.07522	3.49901	18896	24	966	5	0.517598	0.230877	816502|828241|830785|838349|843634	SNF7.2|VPS28-1|VPS20.2|VPS46.1|VPS46.2	-1.98657	9	36	0	0	0	-9.23186	7.11312	0.386909
0	1	0	0	1	0	0	0	0	0	-2.16829	0	0	-3.61428	0	0	0	0	GO:0071985	M010010000	2	0.242726	GO Biological Processes	19	multivesicular body sorting pathway	19_GO:0051179 localization	-2.10743	3.91222	3.38196	18896	25	966	5	0.517598	0.230877	816502|828241|830785|838349|843634	SNF7.2|VPS28-1|VPS20.2|VPS46.1|VPS46.2	-1.91953	9	36	0	0	0	-9.23186	7.11312	0.386909
1	1	0	0	1	0	0	0	0	-2.22688	-3.04154	0	0	-2.08996	0	0	0	0	GO:0000815	M110010000	3	0.233341	GO Cellular Components	20	ESCRT III complex		-2.61712	6.52036	4.44	18896	12	966	4	0.414079	0.20661	816502|830785|838349|843634	SNF7.2|VPS20.2|VPS46.1|VPS46.2	-2.3459	9	36	0	0	0	-9.23186	7.11312	0.386909
0	1	1	0	1	0	1	0	1	0	-2.24012	-2.67013	0	-4.96931	0	-2.49003	0	-3.99514	GO:0007034	M011010101	5	0.324013	GO Biological Processes	19	vacuolar transport	19_GO:0051179 localization	-5.36202	3.41844	5.71252	18896	103	966	18	1.86335	0.435086	816502|818264|821415|823935|824451|824478|824597|827706|828241|828571|830501|830785|831546|833947|834730|838349|839208|843634	SNF7.2|MEMB11|RAB7B|MAG1|VSR1|VPS37-1|VAMP727|ARA7|VPS28-1|NBR1|SNX1|VPS20.2|SYP21|SGR4|VAM3|VPS46.1|VTI1B|VPS46.2	-4.7142	9	36	0	0	0	-9.23186	7.11312	0.386909
0	0	1	0	0	0	0	0	0	0	0	-3.316	0	0	0	0	0	0	GO:0048284	M001000000	1	0.181926	GO Biological Processes	19	organelle fusion	19_GO:0071840 cellular component organization or biogenesis	-2.85856	2.72945	3.73109	18896	86	966	12	1.24224	0.356368	816569|818167|818264|820132|820355|820600|824405|831546|833947|834730|838193|839208	NOP10|BLH1|MEMB11|SYP71|SYP121|RHD3|SYP122|SYP21|SGR4|VAM3|SYP51|VTI1B	-2.54937	9	37	0	0	0	-7.68427	6.22398	0.380234
0	0	0	0	1	0	0	0	0	0	0	0	0	-3.35615	0	0	0	0	GO:0000149	M000010000	1	0.184425	GO Molecular Functions	21	SNARE binding		-3.04466	3.03059	3.97883	18896	71	966	11	1.13872	0.341375	818264|820132|820355|824405|831546|833474|833947|834730|835918|838193|839208	MEMB11|SYP71|SYP121|SYP122|SYP21|AT5G35200|SGR4|VAM3|YKT61|SYP51|VTI1B	-2.70274	9	37	0	0	0	-7.68427	6.22398	0.380234
0	0	1	0	1	0	0	0	0	0	0	-2.22018	0	-3.25794	0	0	0	0	GO:0016050	M001010000	2	0.226037	GO Biological Processes	19	vesicle organization	19_GO:0071840 cellular component organization or biogenesis	-4.2641	2.824	4.77474	18896	98	1229	18	1.46461	0.342673	814675|816502|817306|818264|820132|820355|824405|825430|830785|831546|833474|833947|834718|834730|837737|838193|839208|842833	STL2P|SNF7.2|SKD1|MEMB11|SYP71|SYP121|SYP122|AT3G62560|VPS20.2|SYP21|AT5G35200|SGR4|AGD9|VAM3|SEC22|SYP51|VTI1B|PTAC4	-3.74636	8	37	0	0	0	-7.68427	6.22398	0.380234
0	0	0	0	1	0	0	0	0	0	0	0	0	-3.6137	0	0	0	0	GO:0022406	M000010000	1	0.200047	GO Biological Processes	19	membrane docking	19_GO:0009987 cellular process	-2.77431	2.95675	3.72665	18896	52	1229	10	0.81367	0.256256	816633|819122|820132|820355|823749|824405|831546|834730|836105|838193	SYTA|PVA12|SYP71|SYP121|RABE1c|SYP122|SYP21|VAM3|AT5G59840|SYP51	-2.47855	8	37	0	0	0	-7.68427	6.22398	0.380234
0	0	0	0	1	0	0	0	0	0	0	0	0	-3.88075	0	0	0	0	GO:0048278	M000010000	1	0.215531	GO Biological Processes	19	vesicle docking	19_GO:0051179 localization	-2.29928	3.26018	3.40359	18896	42	966	7	0.724638	0.272893	820132|820355|823749|824405|831546|834730|838193	SYP71|SYP121|RABE1c|SYP122|SYP21|VAM3|SYP51	-2.07913	9	37	0	0	0	-7.68427	6.22398	0.380234
0	1	1	0	1	0	1	0	1	0	-3.73609	-3.38485	0	-5.88598	0	-3.04311	0	-2.24885	GO:0005484	M011010101	5	0.344462	GO Molecular Functions	21	SNAP receptor activity		-7.68427	6.22398	8.05232	18896	44	966	14	1.44928	0.384518	818264|820132|820355|822024|824405|824986|827494|830702|831546|833947|834730|836242|838193|839208	MEMB11|SYP71|SYP121|SYP32|SYP122|BS14A|SYP23|SYP132|SYP21|SGR4|VAM3|SNAP33|SYP51|VTI1B	-6.83109	9	37	0	0	1	-7.68427	6.22398	0.380234
0	0	0	0	1	0	0	0	0	0	0	0	0	-3.1299	0	0	0	0	GO:0006906	M000010000	1	0.170104	GO Biological Processes	19	vesicle fusion	19_GO:0051179 localization	-3.5704	4.09418	4.71478	18896	43	966	9	0.931677	0.309109	818264|820132|820355|824405|831546|833947|834730|838193|839208	MEMB11|SYP71|SYP121|SYP122|SYP21|SGR4|VAM3|SYP51|VTI1B	-3.14823	9	37	0	0	0	-7.68427	6.22398	0.380234
0	0	0	0	1	0	0	0	0	0	0	0	0	-3.6137	0	0	0	0	GO:0140056	M000010000	1	0.200047	GO Biological Processes	19	organelle localization by membrane tethering	19_GO:0051179 localization	-2.77431	2.95675	3.72665	18896	52	1229	10	0.81367	0.256256	816633|819122|820132|820355|823749|824405|831546|834730|836105|838193	SYTA|PVA12|SYP71|SYP121|RABE1c|SYP122|SYP21|VAM3|AT5G59840|SYP51	-2.47855	8	37	0	0	0	-7.68427	6.22398	0.380234
0	0	0	0	1	0	0	0	0	0	0	0	0	-2.03707	0	0	0	0	GO:0051640	M000010000	1	0.0918432	GO Biological Processes	19	organelle localization	19_GO:0051179 localization	-2.49059	1.94622	3.1501	18896	158	1229	20	1.62734	0.360911	814675|814908|816633|819122|820132|820355|823749|824405|825430|827661|830383|831546|832124|834660|834718|834730|835612|836105|838193|840860	STL2P|NMD3|SYTA|PVA12|SYP71|SYP121|RABE1c|SYP122|AT3G62560|ABCE2|AT5G05010|SYP21|RAN2|DELTA-OAT|AGD9|VAM3|RAN3|AT5G59840|SYP51|PMI1	-2.23817	8	37	0	0	0	-7.68427	6.22398	0.380234
0	0	1	0	1	0	1	0	0	0	0	-2.32023	0	-4.3166	0	-2.75957	0	0	GO:0031201	M001010100	3	0.30578	GO Cellular Components	20	SNARE complex		-4.82845	5.14765	5.94043	18896	38	966	10	1.0352	0.325659	818264|820132|820355|824405|824597|831546|833947|834730|838193|839208	MEMB11|SYP71|SYP121|SYP122|VAMP727|SYP21|SGR4|VAM3|SYP51|VTI1B	-4.23846	9	37	0	0	0	-7.68427	6.22398	0.380234
0	1	1	0	1	0	0	0	0	0	-3.73609	-3.38485	0	-5.88598	0	0	0	0	ko04130	M011010000	3	0.380234	KEGG Pathway	24	SNARE interactions in vesicular transport		-6.75027	5.77941	7.36705	18896	44	966	13	1.34576	0.370725	818264|820132|820355|822024|824405|824986|829347|830702|832297|833947|835918|838193|839208	MEMB11|SYP71|SYP121|SYP32|SYP122|BS14A|VAMP711|SYP132|VAMP714|SGR4|YKT61|SYP51|VTI1B	-5.96537	9	37	0	0	0	-7.68427	6.22398	0.380234
0	1	1	0	1	0	0	0	0	0	-3.73609	-3.38485	0	-5.88598	0	0	0	0	ath04130	M011010000	3	0.380234	KEGG Pathway	24	SNARE interactions in vesicular transport		-6.75027	5.77941	7.36705	18896	44	966	13	1.34576	0.370725	818264|820132|820355|822024|824405|824986|829347|830702|832297|833947|835918|838193|839208	MEMB11|SYP71|SYP121|SYP32|SYP122|BS14A|VAMP711|SYP132|VAMP714|SGR4|YKT61|SYP51|VTI1B	-5.96537	9	37	1	1	0	-7.68427	6.22398	0.380234
0	0	1	0	1	0	0	0	0	0	0	-2.08694	0	-3.41494	0	0	0	0	GO:0090174	M001010000	2	0.229665	GO Biological Processes	19	organelle membrane fusion	19_GO:0071840 cellular component organization or biogenesis	-3.97061	4.16193	5.03766	18896	47	966	10	1.0352	0.325659	818264|820132|820355|820600|824405|831546|833947|834730|838193|839208	MEMB11|SYP71|SYP121|RHD3|SYP122|SYP21|SGR4|VAM3|SYP51|VTI1B	-3.49267	9	37	0	0	0	-7.68427	6.22398	0.380234
0	1	1	0	1	0	1	0	1	0	-3.34162	-4.15257	0	-5.77256	0	-3.12301	0	-2.03667	GO:0061025	M011010101	5	0.350323	GO Biological Processes	19	membrane fusion	19_GO:0071840 cellular component organization or biogenesis	-7.0329	4.89027	7.23591	18896	64	966	16	1.65631	0.410635	818264|820132|820355|820600|822024|824405|827494|829347|830702|831546|833947|834730|836242|836244|838193|839208	MEMB11|SYP71|SYP121|RHD3|SYP32|SYP122|SYP23|VAMP711|SYP132|SYP21|SGR4|VAM3|SNAP33|ANK6|SYP51|VTI1B	-6.22685	9	37	0	0	0	-7.68427	6.22398	0.380234
1	1	0	1	0	0	0	0	0	-8.40083	-8.11147	0	-9.79427	0	0	0	0	0	M00145	M110100000	3	0.492521	KEGG Structural Complexes	25	NAD(P)H:quinone oxidoreductase, chloroplasts and cyanobacteria		-8.00675	10.3294	9.04552	18896	12	1372	9	0.655977	0.217941	844705|844739|844741|844756|844761|844762|844763|844804|844806	ndhF|ndhG|ndhE|ndhD|ndhK|ndhC|ndhJ|ndhA|ndhI	-7.12531	7	38	1	1	1	-8.00675	10.3294	0.492521
1	1	0	1	0	0	0	0	0	-8.40083	-8.11147	0	-9.79427	0	0	0	0	0	ath_M00145	M110100000	3	0.492521	KEGG Structural Complexes	25	NAD(P)H:quinone oxidoreductase, chloroplasts and cyanobacteria		-8.00675	10.3294	9.04552	18896	12	1372	9	0.655977	0.217941	844705|844739|844741|844756|844761|844762|844763|844804|844806	ndhF|ndhG|ndhE|ndhD|ndhK|ndhC|ndhJ|ndhA|ndhI	-7.12531	7	38	0	0	0	-8.00675	10.3294	0.492521
1	0	0	1	1	1	1	1	1	-5.11783	0	0	-4.10735	-11.5909	-2.28049	-20.4037	-8.27391	-9.23239	GO:0042493	M100111111	7	0.449539	GO Biological Processes	19	response to drug	19_GO:0050896 response to stimulus	-13.7529	1.95683	8.41347	18896	499	2477	128	5.16754	0.444793	815101|815160|816478|816864|816993|817491|817513|817901|817923|818034|818166|818319|818429|818562|818588|818605|818973|818982|819125|819204|819244|819567|819684|820005|820264|820355|820628|820752|820924|821048|821225|821495|821667|821717|821904|822447|823815|823994|824115|824405|824410|824764|825291|825298|825880|826213|826515|826738|826884|827039|827435|827452|827463|827464|827786|827899|828090|…	GRP-3|OPR3|ACO1|WRKY15|WRKY17|GSTU7|THIC|RD20|LYK5|ACD11|PUB23|ZAT11|WRKY33|CYT1|HSPRO2|CZF1|SSI2|MPK6|ATG8E|PIP1B|JAR1|GAPC1|ATL6|AAC1|AT3G10930|SYP121|FLU|ERF4|ATL2|AT3G17800|AT3G02840|ZF2|BBX32|CERK1|MYB15|PMZ|RDUF1|BT2|NAC062|SYP122|PUB22|SZF1|BAP1|AT3G61260|UBQ10|ATOZI1|NDPK1|RHA1B|NUDT7|SBP1|SCL13|AT4G17410|ERF6|ERF-1|LSD1|ADNT1|RBP-DR1|MPK4|GSH1|FSD1|AT4G26400|AAC3|WRKY11|WRKY18|GAMMA-VPE|…	-12.4377	4	39	0	0	1	-13.7529	2.4006	0.483929
1	0	0	1	1	0	1	1	1	-3.80996	0	0	-4.30199	-8.85556	0	-17.1317	-7.18626	-4.93868	GO:0010200	M100110111	6	0.458649	GO Biological Processes	19	response to chitin	19_GO:0050896 response to stimulus	-8.06008	2.4006	6.52996	18896	143	2477	45	1.81671	0.268348	816864|816993|817923|818166|818319|818429|818605|819684|820752|820924|821495|821667|821717|821904|822447|823815|824115|824410|824764|826738|827435|827463|827464|828746|829282|829308|829539|829880|829915|832801|834768|834770|834923|836074|836103|836322|836739|836865|837414|839666|840158|840897|842281|842527|844423	WRKY15|WRKY17|LYK5|PUB23|ZAT11|WRKY33|CZF1|ATL6|ERF4|ATL2|ZF2|BBX32|CERK1|MYB15|PMZ|RDUF1|NAC062|PUB22|SZF1|RHA1B|SCL13|ERF6|ERF-1|AT4G26400|WRKY11|WRKY18|AT4G33940|MYB73|BT5|CNI1|ERF2|ERF5|AT5G48655|RDUF2|RHL41|HSFB2A|AT5G66070|MYBR1|ERD6|STZ|MYC2|BZIP60|PEN3|WRKY6|WRKY40	-7.17376	4	39	0	0	0	-13.7529	2.4006	0.483929
0	0	0	1	1	0	1	1	1	0	0	0	-3.57542	-7.57213	0	-15.5229	-5.89782	-6.66145	GO:0010243	M000110111	5	0.483355	GO Biological Processes	19	response to organonitrogen compound	19_GO:0050896 response to stimulus	-7.85421	2.00592	6.23136	18896	251	2477	66	2.66451	0.32358	816666|816864|816993|817513|817923|818166|818319|818429|818605|818982|819296|819684|820142|820752|820924|821495|821667|821717|821904|822447|823815|824115|824410|824764|824901|825654|825905|826738|827088|827435|827463|827464|828746|829119|829282|829308|829539|829556|829880|829915|830048|830459|832801|833755|834316|834768|834770|834923|836074|836103|836322|836739|836865|837414|837576|838300|838513|…	UFD1|WRKY15|WRKY17|THIC|LYK5|PUB23|ZAT11|WRKY33|CZF1|MPK6|CCA1|ATL6|CDC48|ERF4|ATL2|ZF2|BBX32|CERK1|MYB15|PMZ|RDUF1|NAC062|PUB22|SZF1|AT3G57340|RMA1|IBR1|RHA1B|IBR10|SCL13|ERF6|ERF-1|AT4G26400|AT4G29960|WRKY11|WRKY18|AT4G33940|CER9|MYB73|BT5|AT4G38930|AT5G05750|CNI1|TCH2|RPT4A|ERF2|ERF5|AT5G48655|RDUF2|RHL41|HSFB2A|AT5G66070|MYBR1|ERD6|ERD9|UBC34|AT1G19310|STZ|MYC2|BZIP60|AT1G50670|PEN3|FBS1|WRKY…	-6.98624	4	39	0	0	0	-13.7529	2.4006	0.483929
0	0	0	1	1	1	1	1	1	0	0	0	-3.88602	-8.54978	-2.06327	-16.8319	-4.94344	-7.4858	GO:1901698	M000111111	6	0.483929	GO Biological Processes	19	response to nitrogen compound	19_GO:0050896 response to stimulus	-9.54144	2.02082	6.94589	18896	302	2477	80	3.22971	0.355214	816055|816478|816666|816864|816993|817513|817923|818166|818319|818429|818562|818605|818982|819296|819684|820142|820752|820924|821495|821667|821717|821904|822447|823556|823815|823994|824115|824410|824764|824901|825317|825654|825905|826738|827088|827435|827463|827464|828542|828746|829119|829282|829308|829539|829556|829880|829915|830048|830459|832290|832801|833755|834077|834090|834316|834768|834770|…	NIR1|ACO1|UFD1|WRKY15|WRKY17|THIC|LYK5|PUB23|ZAT11|WRKY33|CYT1|CZF1|MPK6|CCA1|ATL6|CDC48|ERF4|ATL2|ZF2|BBX32|CERK1|MYB15|PMZ|NIT1|RDUF1|BT2|NAC062|PUB22|SZF1|AT3G57340|CYSC1|RMA1|IBR1|RHA1B|IBR10|SCL13|ERF6|ERF-1|CIPK8|AT4G26400|AT4G29960|WRKY11|WRKY18|AT4G33940|CER9|MYB73|BT5|AT4G38930|AT5G05750|NIT4|CNI1|TCH2|PHB3|CLC-A|RPT4A|ERF2|ERF5|AT5G48655|RDUF2|RHL41|HSFB2A|AT5G66070|MYBR1|POM1|NRT2:1|ER…	-8.54388	4	39	1	1	0	-13.7529	2.4006	0.483929
1	0	0	1	1	1	1	1	1	-2.19584	0	0	-2.37604	-4.99751	-2.13752	-9.34486	-3.90013	-6.11029	GO:0046677	M100111111	7	0.3773	GO Biological Processes	19	response to antibiotic	19_GO:0050896 response to stimulus	-8.62117	2.49025	6.91399	18896	271	1372	49	3.57143	0.50101	815160|817491|817901|818034|818562|818588|818973|818982|819244|819567|820264|820355|823994|824405|825291|825298|825880|826213|826515|826884|827039|828151|828409|828613|829308|829431|829661|829915|830354|830424|830520|831720|831928|832820|833755|834313|836437|836865|837708|837956|838122|838544|838652|840115|840295|843864|844001|844047|844423	OPR3|GSTU7|RD20|ACD11|CYT1|HSPRO2|SSI2|MPK6|JAR1|GAPC1|AT3G10930|SYP121|BT2|SYP122|BAP1|AT3G61260|UBQ10|ATOZI1|NDPK1|NUDT7|SBP1|MPK4|GSH1|FSD1|WRKY18|GAMMA-VPE|CAT2|BT5|AT5G04760|DREB2A|NHL3|FER1|CSD3|LACS7|TCH2|TRX3|BT1|MYBR1|RBP45B|WRKY4|ABCG40|DHAR1|CAT1|RCD1|UPF3|DHAR2|OPR1|ADH1|WRKY40	-7.69391	7	40	0	0	1	-8.62117	2.49025	0.393723
0	0	0	0	1	0	1	1	1	0	0	0	0	-2.20985	0	-6.25476	-2.25212	-2.14301	GO:0009751	M000010111	4	0.352601	GO Biological Processes	19	response to salicylic acid	19_GO:0050896 response to stimulus	-3.50032	2.06987	3.95549	18896	173	1372	26	1.89504	0.36811	817491|817901|818034|818588|818973|820355|823994|824405|825291|825298|825880|828151|829308|829431|829915|830354|830520|836437|836865|837956|838122|838544|840295|843864|844001|844423	GSTU7|RD20|ACD11|HSPRO2|SSI2|SYP121|BT2|SYP122|BAP1|AT3G61260|UBQ10|MPK4|WRKY18|GAMMA-VPE|BT5|AT5G04760|NHL3|BT1|MYBR1|WRKY4|ABCG40|DHAR1|UPF3|DHAR2|OPR1|WRKY40	-3.0887	7	40	0	0	0	-8.62117	2.49025	0.393723
0	0	0	1	1	0	1	1	1	0	0	0	-2.6496	-2.47917	0	-8.49035	-3.24422	-2.72081	GO:0014070	M000110111	5	0.393723	GO Biological Processes	19	response to organic cyclic compound	19_GO:0050896 response to stimulus	-4.10657	1.86979	4.26349	18896	302	1372	41	2.98834	0.459674	817491|817901|818034|818588|818973|819554|820355|823994|824405|825291|825298|825506|825880|827088|828151|829158|829308|829431|829676|829915|830029|830354|830520|835860|835878|836437|836865|837956|837960|838122|838544|838837|839529|840105|840295|840403|842281|843864|844001|844047|844423	GSTU7|RD20|ACD11|HSPRO2|SSI2|AT3G03990|SYP121|BT2|SYP122|BAP1|AT3G61260|BIL4|UBQ10|IBR10|MPK4|AT4G30350|WRKY18|GAMMA-VPE|BSK1|BT5|ROC1|AT5G04760|NHL3|TCH4|AT5G57710|BT1|MYBR1|WRKY4|VIK|ABCG40|DHAR1|GRF10|CRY2|IWS1|UPF3|GF14 PHI|PEN3|DHAR2|OPR1|ADH1|WRKY40	-3.60842	7	40	1	1	0	-8.62117	2.49025	0.393723
1	0	0	1	1	1	1	1	1	-12.2244	0	0	-6.67889	-8.76575	-6.02033	-40.1397	-10.4047	-10.554	GO:0070482	M100111111	7	0.46614	GO Biological Processes	19	response to oxygen levels	19_GO:0050896 response to stimulus	-13.9216	2.35589	8.74851	18896	272	2477	84	3.3912	0.363682	814646|817115|817207|817780|817925|818231|818588|818605|818701|818709|818741|819353|819386|820163|820531|820752|821357|821625|821893|822041|822119|822525|822833|824764|824855|825414|826884|827435|827734|827786|828377|828516|828524|828891|829100|829167|829559|830003|830313|830424|830520|831158|832032|832043|832075|832145|832801|833550|834210|834244|834842|835535|835585|835860|836103|836372|836499|…	PAP1|AT2G25735|SPX2|AT2G32210|CRL1|AT2G36580|HSPRO2|CZF1|CAMBP25|TCH3|ERD15|CP12-1|GSTF8|AT3G10020|AT3G13310|ERF4|BTS|EIN3|AT3G23170|MBF1C|AGC2-1|MYB30|ERD5|SZF1|AT3G56880|CP12-2|NUDT7|SCL13|AT4G19880|LSD1|ACR7|AT4G24160|ACBP3|ACBP2|AT4G29780|GAE1|UGT73B3|STY46|ZAT6|DREB2A|NHL3|GILP|AT5G19120|AT5G19230|ASP2|BCB|CNI1|AT5G35735|AT5G42050|CML37|RBOHD|BBX29|AT5G54940|TCH4|RHL41|SRO5|NAC102|AT5G66650|…	-12.5884	4	41	1	1	0	-14.0234	2.44868	0.46614
1	0	0	1	1	1	1	1	1	-10.9921	0	0	-7.74449	-9.67974	-6.92661	-40.5826	-11.2489	-11.193	GO:0071456	M100111111	7	0.444716	GO Biological Processes	19	cellular response to hypoxia	19_GO:0050896 response to stimulus	-12.7941	2.38393	8.38058	18896	240	2477	75	3.02786	0.344293	814646|817115|817207|817780|817925|818231|818588|818605|818701|818709|818741|819386|820163|820531|820752|821357|821893|822041|822119|822833|824764|824855|826884|827435|827734|828377|828516|828524|829100|829167|829559|830003|830313|830424|830520|831158|832032|832043|832075|832145|832801|833550|834210|834244|834842|835535|835585|835860|836103|836372|836499|836797|837224|837226|837428|837551|837886|…	PAP1|AT2G25735|SPX2|AT2G32210|CRL1|AT2G36580|HSPRO2|CZF1|CAMBP25|TCH3|ERD15|GSTF8|AT3G10020|AT3G13310|ERF4|BTS|AT3G23170|MBF1C|AGC2-1|ERD5|SZF1|AT3G56880|NUDT7|SCL13|AT4G19880|ACR7|AT4G24160|ACBP3|AT4G29780|GAE1|UGT73B3|STY46|ZAT6|DREB2A|NHL3|GILP|AT5G19120|AT5G19230|ASP2|BCB|CNI1|AT5G35735|AT5G42050|CML37|RBOHD|BBX29|AT5G54940|TCH4|RHL41|SRO5|NAC102|AT5G66650|AT1G07135|MAPKKK13|SRC2|AT1G10140|RA…	-11.5685	4	41	0	0	0	-14.0234	2.44868	0.46614
1	0	0	1	1	1	1	1	1	-11.9244	0	0	-7.63633	-9.49007	-6.78912	-41.1542	-11.0989	-10.9769	GO:0071453	M100111111	7	0.451503	GO Biological Processes	19	cellular response to oxygen levels	19_GO:0050896 response to stimulus	-13.981	2.44868	8.82805	18896	243	2477	78	3.14897	0.350892	814646|817115|817207|817780|817925|818231|818588|818605|818701|818709|818741|819353|819386|820163|820531|820752|821357|821893|822041|822119|822833|824764|824855|825414|826884|827435|827734|828377|828516|828524|829100|829167|829559|830003|830313|830424|830520|831158|832032|832043|832075|832145|832801|833550|834210|834244|834842|835535|835585|835860|836103|836372|836499|836797|837224|837226|837428|…	PAP1|AT2G25735|SPX2|AT2G32210|CRL1|AT2G36580|HSPRO2|CZF1|CAMBP25|TCH3|ERD15|CP12-1|GSTF8|AT3G10020|AT3G13310|ERF4|BTS|AT3G23170|MBF1C|AGC2-1|ERD5|SZF1|AT3G56880|CP12-2|NUDT7|SCL13|AT4G19880|ACR7|AT4G24160|ACBP3|AT4G29780|GAE1|UGT73B3|STY46|ZAT6|DREB2A|NHL3|GILP|AT5G19120|AT5G19230|ASP2|BCB|CNI1|AT5G35735|AT5G42050|CML37|RBOHD|BBX29|AT5G54940|TCH4|RHL41|SRO5|NAC102|AT5G66650|AT1G07135|MAPKKK13|SRC…	-12.643	4	41	0	0	0	-14.0234	2.44868	0.46614
1	0	0	1	1	1	1	1	1	-11.9244	0	0	-7.63633	-9.49007	-6.78912	-41.1542	-11.0989	-10.9769	GO:0036294	M100111111	7	0.451503	GO Biological Processes	19	cellular response to decreased oxygen levels	19_GO:0050896 response to stimulus	-13.981	2.44868	8.82805	18896	243	2477	78	3.14897	0.350892	814646|817115|817207|817780|817925|818231|818588|818605|818701|818709|818741|819353|819386|820163|820531|820752|821357|821893|822041|822119|822833|824764|824855|825414|826884|827435|827734|828377|828516|828524|829100|829167|829559|830003|830313|830424|830520|831158|832032|832043|832075|832145|832801|833550|834210|834244|834842|835535|835585|835860|836103|836372|836499|836797|837224|837226|837428|…	PAP1|AT2G25735|SPX2|AT2G32210|CRL1|AT2G36580|HSPRO2|CZF1|CAMBP25|TCH3|ERD15|CP12-1|GSTF8|AT3G10020|AT3G13310|ERF4|BTS|AT3G23170|MBF1C|AGC2-1|ERD5|SZF1|AT3G56880|CP12-2|NUDT7|SCL13|AT4G19880|ACR7|AT4G24160|ACBP3|AT4G29780|GAE1|UGT73B3|STY46|ZAT6|DREB2A|NHL3|GILP|AT5G19120|AT5G19230|ASP2|BCB|CNI1|AT5G35735|AT5G42050|CML37|RBOHD|BBX29|AT5G54940|TCH4|RHL41|SRO5|NAC102|AT5G66650|AT1G07135|MAPKKK13|SRC…	-12.643	4	41	0	0	0	-14.0234	2.44868	0.46614
1	0	0	1	1	1	1	1	1	-12.2908	0	0	-6.70946	-8.82146	-6.05972	-40.2697	-10.4491	-10.6191	GO:0036293	M100111111	7	0.465864	GO Biological Processes	19	response to decreased oxygen levels	19_GO:0050896 response to stimulus	-14.0234	2.36458	8.78817	18896	271	2477	84	3.3912	0.363682	814646|817115|817207|817780|817925|818231|818588|818605|818701|818709|818741|819353|819386|820163|820531|820752|821357|821625|821893|822041|822119|822525|822833|824764|824855|825414|826884|827435|827734|827786|828377|828516|828524|828891|829100|829167|829559|830003|830313|830424|830520|831158|832032|832043|832075|832145|832801|833550|834210|834244|834842|835535|835585|835860|836103|836372|836499|…	PAP1|AT2G25735|SPX2|AT2G32210|CRL1|AT2G36580|HSPRO2|CZF1|CAMBP25|TCH3|ERD15|CP12-1|GSTF8|AT3G10020|AT3G13310|ERF4|BTS|EIN3|AT3G23170|MBF1C|AGC2-1|MYB30|ERD5|SZF1|AT3G56880|CP12-2|NUDT7|SCL13|AT4G19880|LSD1|ACR7|AT4G24160|ACBP3|ACBP2|AT4G29780|GAE1|UGT73B3|STY46|ZAT6|DREB2A|NHL3|GILP|AT5G19120|AT5G19230|ASP2|BCB|CNI1|AT5G35735|AT5G42050|CML37|RBOHD|BBX29|AT5G54940|TCH4|RHL41|SRO5|NAC102|AT5G66650|…	-12.6795	4	41	0	0	1	-14.0234	2.44868	0.46614
1	0	0	1	1	1	1	1	1	-11.5082	0	0	-6.86479	-9.10532	-6.26048	-39.9628	-10.6742	-10.9505	GO:0001666	M100111111	7	0.457945	GO Biological Processes	19	response to hypoxia	19_GO:0050896 response to stimulus	-13.0761	2.32299	8.44022	18896	266	2477	81	3.27008	0.357353	814646|817115|817207|817780|817925|818231|818588|818605|818701|818709|818741|819386|820163|820531|820752|821357|821625|821893|822041|822119|822525|822833|824764|824855|826884|827435|827734|827786|828377|828516|828524|828891|829100|829167|829559|830003|830313|830424|830520|831158|832032|832043|832075|832145|832801|833550|834210|834244|834842|835535|835585|835860|836103|836372|836499|836797|837224|…	PAP1|AT2G25735|SPX2|AT2G32210|CRL1|AT2G36580|HSPRO2|CZF1|CAMBP25|TCH3|ERD15|GSTF8|AT3G10020|AT3G13310|ERF4|BTS|EIN3|AT3G23170|MBF1C|AGC2-1|MYB30|ERD5|SZF1|AT3G56880|NUDT7|SCL13|AT4G19880|LSD1|ACR7|AT4G24160|ACBP3|ACBP2|AT4G29780|GAE1|UGT73B3|STY46|ZAT6|DREB2A|NHL3|GILP|AT5G19120|AT5G19230|ASP2|BCB|CNI1|AT5G35735|AT5G42050|CML37|RBOHD|BBX29|AT5G54940|TCH4|RHL41|SRO5|NAC102|AT5G66650|AT1G07135|MAPK…	-11.8273	4	41	0	0	0	-14.0234	2.44868	0.46614
0	0	1	1	0	1	1	1	1	0	0	-3.49747	-16.851	0	-2.62406	-5.31619	-7.59372	-5.58443	GO:0031982	M001101111	6	0.474991	GO Cellular Components	20	vesicle		-6.04833	2.27353	5.58806	18896	778	438	41	9.36073	1.3918	816502|816605|817546|817874|818594|818952|820001|820419|820735|820816|821798|821856|822594|823935|824352|824451|824478|824597|824649|825044|825119|825430|825458|827706|828241|829167|831546|832188|833947|834035|834730|835414|835918|838776|839419|839619|839943|842251|843278|843526|843634	SNF7.2|AT2G20760|CYP5|SAR1|CLC2|TI1|AT3G08530|ELC|RABA1g|PLDALPHA1|AT3G22290|AT3G22845|UGD2|MAG1|AT3G51890|VSR1|VPS37-1|VAMP727|ARA6|CSY2|AT3G59500|AT3G62560|AUD1|ARA7|VPS28-1|GAE1|SYP21|COPT5|SGR4|GRXC2|VAM3|AT5G53330|YKT61|PBC1|VAMP721|AT1G27300|AT1G30630|DL3|AT1G69460|AT1G71950|VPS46.2	-5.33016	12	42	0	0	0	-6.76318	2.45471	0.480059
0	0	1	1	0	1	1	1	1	0	0	-4.26014	-19.1506	0	-3.04236	-6.46189	-8.70371	-6.7012	GO:0097708	M001101111	6	0.478634	GO Cellular Components	20	intracellular vesicle		-6.73088	2.44775	6.035	18896	705	438	40	9.13242	1.37645	816502|816605|817546|817874|818594|818952|820001|820419|820735|820816|821798|821856|822594|823935|824352|824451|824478|824597|824649|825044|825119|825430|825458|827706|828241|829167|831546|832188|833947|834035|834730|835414|838776|839419|839619|839943|842251|843278|843526|843634	SNF7.2|AT2G20760|CYP5|SAR1|CLC2|TI1|AT3G08530|ELC|RABA1g|PLDALPHA1|AT3G22290|AT3G22845|UGD2|MAG1|AT3G51890|VSR1|VPS37-1|VAMP727|ARA6|CSY2|AT3G59500|AT3G62560|AUD1|ARA7|VPS28-1|GAE1|SYP21|COPT5|SGR4|GRXC2|VAM3|AT5G53330|PBC1|VAMP721|AT1G27300|AT1G30630|DL3|AT1G69460|AT1G71950|VPS46.2	-5.94896	12	42	0	0	0	-6.76318	2.45471	0.480059
0	0	1	1	0	1	1	1	1	0	0	-4.11072	-19.2183	0	-3.07272	-6.50553	-8.74845	-6.75808	GO:0031410	M001101111	6	0.480059	GO Cellular Components	20	cytoplasmic vesicle		-6.76318	2.45471	6.05509	18896	703	438	40	9.13242	1.37645	816502|816605|817546|817874|818594|818952|820001|820419|820735|820816|821798|821856|822594|823935|824352|824451|824478|824597|824649|825044|825119|825430|825458|827706|828241|829167|831546|832188|833947|834035|834730|835414|838776|839419|839619|839943|842251|843278|843526|843634	SNF7.2|AT2G20760|CYP5|SAR1|CLC2|TI1|AT3G08530|ELC|RABA1g|PLDALPHA1|AT3G22290|AT3G22845|UGD2|MAG1|AT3G51890|VSR1|VPS37-1|VAMP727|ARA6|CSY2|AT3G59500|AT3G62560|AUD1|ARA7|VPS28-1|GAE1|SYP21|COPT5|SGR4|GRXC2|VAM3|AT5G53330|PBC1|VAMP721|AT1G27300|AT1G30630|DL3|AT1G69460|AT1G71950|VPS46.2	-5.97728	12	42	1	1	1	-6.76318	2.45471	0.480059
0	0	1	1	0	0	0	0	0	0	0	-2.51909	-5.80574	0	0	0	0	0	GO:0044431	M001100000	2	0.344832	GO Cellular Components	20	Golgi apparatus part		-2.21483	2.3159	3.05027	18896	473	207	12	5.7971	1.62425	816605|817546|818594|820001|824451|825119|825458|829167|833947|839619|842281|844073	AT2G20760|CYP5|CLC2|AT3G08530|VSR1|AT3G59500|AUD1|GAE1|SGR4|AT1G27300|PEN3|AT1G77370	-2.01025	14	42	0	0	0	-6.76318	2.45471	0.480059
0	0	0	0	1	0	0	0	1	0	0	0	0	-4.24599	0	0	0	-2.56508	GO:0009787	M000010001	2	0.284461	GO Biological Processes	19	regulation of abscisic acid-activated signaling pathway	19_GO:0023052 signaling	-2.97676	1.79861	3.4513	18896	123	2477	29	1.17077	0.21613	817170|817876|819911|820816|821005|821182|824214|826541|828714|829520|829541|829733|830556|832195|832215|833752|834158|834184|835397|835809|835956|836163|836367|836739|837210|838073|839324|840471|840860	GP ALPHA 1|PKT3|RGLG1|PLDALPHA1|AT3G17410|TMAC2|SNRK2.2|CPK4|ABI1|AT4G33780|OST1|PLDDELTA|CIPK15|CPN20|AIP2|AT5G37740|AT5G41560|CIP1|RCAR3|ABI2|EXO70B1|SIZ1|MYB96|AT5G66070|EXO70B2|RHA2A|MAPKKK18|CDPK2|PMI1	-2.64774	4	43	0	0	0	-16.315	1.95869	0.479987
0	0	1	0	1	0	1	1	1	0	0	-2.06181	0	-11.4068	0	-6.30448	-3.37438	-5.42207	GO:0071229	M001010111	5	0.469144	GO Biological Processes	19	cellular response to acid chemical	19_GO:0050896 response to stimulus	-7.84261	1.68344	6.03426	18896	503	2477	111	4.48123	0.4157	814873|815055|816478|816837|817170|817240|817544|817553|817721|817876|818411|818609|818973|818982|819010|819244|819280|819911|820355|820364|820752|820789|820816|820956|821005|821170|821182|821338|821463|821610|823994|824214|824405|824853|824880|824920|825091|825476|825648|826541|826728|827786|827923|828053|828090|828151|828465|828714|829282|829520|829541|829733|829935|830427|830443|830548|830556|…	NRP1|LHCB2.2|ACO1|AT2G23070|GP ALPHA 1|CIPK3|ABCG31|AT2G30020|ATX1|PKT3|PYL4|PP2C5|SSI2|MPK6|COS1|JAR1|HB-7|RGLG1|SYP121|UBP13|ERF4|NAC3|PLDALPHA1|UBC32|AT3G17410|BPM4|TMAC2|RACK1C_AT|ABF4|UBP14|BT2|SNRK2.2|SYP122|UBA2A|BOP1|CPK32|PRN|GID1B|CUL1|CPK4|SGT1B|LSD1|PYL7|SAG21|RBP-DR1|MPK4|CDPK6|ABI1|WRKY11|AT4G33780|OST1|PLDDELTA|HAT22|PYL5|AT5G05600|UBP12|CIPK15|CYS1|JAZ10|CSD3|BPM1|CPN20|JAZ12|AIP2…	-6.97493	4	43	0	0	0	-16.315	1.95869	0.479987
0	0	0	0	1	0	1	1	1	0	0	0	0	-8.72217	0	-8.56494	-4.21998	-4.33518	GO:0032870	M000010111	4	0.457337	GO Biological Processes	19	cellular response to hormone stimulus	19_GO:0050896 response to stimulus	-5.55156	1.44435	4.82307	18896	750	2477	142	5.73274	0.467088	814873|815055|816650|816837|817087|817170|817240|817544|817553|817721|817876|818265|818411|818609|818973|818982|819010|819014|819244|819280|819314|819554|819911|820355|820364|820752|820789|820816|821005|821182|821338|821463|821575|821610|821625|822041|822593|823749|823994|824214|824405|824468|824564|824853|824880|824920|825091|825476|825506|825648|826541|826601|826728|827463|827774|827786|827923|…	NRP1|LHCB2.2|XCT|AT2G23070|EBF1|GP ALPHA 1|CIPK3|ABCG31|AT2G30020|ATX1|PKT3|ABCB1|PYL4|PP2C5|SSI2|MPK6|COS1|ARL|JAR1|HB-7|ABCB4|AT3G03990|RGLG1|SYP121|UBP13|ERF4|NAC3|PLDALPHA1|AT3G17410|TMAC2|RACK1C_AT|ABF4|ERF7|UBP14|EIN3|MBF1C|AHP2|RABE1c|BT2|SNRK2.2|SYP122|STV1|AT3G53970|UBA2A|BOP1|CPK32|PRN|GID1B|BIL4|CUL1|CPK4|CNX7|SGT1B|ERF6|BAM3|LSD1|PYL7|RBP-DR1|MPK4|CDPK6|ABI1|WRKY11|KNAT5|AT4G33780|OST…	-4.88312	4	43	0	0	0	-16.315	1.95869	0.479987
0	0	0	0	1	0	1	1	1	0	0	0	0	-8.46838	0	-8.21935	-3.83576	-3.755	GO:0071495	M000010111	4	0.455079	GO Biological Processes	19	cellular response to endogenous stimulus	19_GO:0050896 response to stimulus	-5.04579	1.41016	4.54092	18896	779	2477	144	5.81348	0.470164	814873|815055|816650|816837|817087|817170|817240|817544|817553|817721|817876|817923|818265|818411|818609|818973|818982|819010|819014|819244|819280|819314|819554|819911|820355|820364|820752|820789|820816|821005|821182|821338|821463|821575|821610|821625|821717|822041|822593|823749|823994|824214|824405|824468|824564|824853|824880|824920|825091|825476|825506|825648|826541|826601|826728|827463|827774|…	NRP1|LHCB2.2|XCT|AT2G23070|EBF1|GP ALPHA 1|CIPK3|ABCG31|AT2G30020|ATX1|PKT3|LYK5|ABCB1|PYL4|PP2C5|SSI2|MPK6|COS1|ARL|JAR1|HB-7|ABCB4|AT3G03990|RGLG1|SYP121|UBP13|ERF4|NAC3|PLDALPHA1|AT3G17410|TMAC2|RACK1C_AT|ABF4|ERF7|UBP14|EIN3|CERK1|MBF1C|AHP2|RABE1c|BT2|SNRK2.2|SYP122|STV1|AT3G53970|UBA2A|BOP1|CPK32|PRN|GID1B|BIL4|CUL1|CPK4|CNX7|SGT1B|ERF6|BAM3|LSD1|PYL7|RBP-DR1|MPK4|CDPK6|ABI1|WRKY11|KNAT5|AT…	-4.43144	4	43	0	0	0	-16.315	1.95869	0.479987
0	0	1	1	1	1	1	1	1	0	0	-2.02266	-5.23066	-18.3454	-6.95938	-20.6574	-8.57533	-9.30696	GO:0097305	M001111111	7	0.451691	GO Biological Processes	19	response to alcohol	19_GO:0050896 response to stimulus	-16.315	1.95506	9.2102	18896	597	2477	153	6.17683	0.483699	814873|815055|815101|815120|816293|816413|816464|816837|817170|817240|817544|817553|817721|817784|817876|817901|817925|818167|818226|818411|818609|818627|818982|819125|819172|819262|819280|819295|819757|819911|819925|820355|820619|820752|820816|821005|821182|821198|821338|821463|821495|821575|821732|821807|822041|822447|823815|823942|823994|824214|824261|824355|824484|824642|824853|824920|824956|…	NRP1|LHCB2.2|GRP-3|ACO3|ERD7|HA1|TAG1|AT2G23070|GP ALPHA 1|CIPK3|ABCG31|AT2G30020|ATX1|AT2G32240|PKT3|RD20|CRL1|BLH1|LOS2|PYL4|PP2C5|DREB2C|MPK6|ATG8E|SAP18|AIB|HB-7|PSI-P|RCI2A|RGLG1|CHIP|SYP121|RSH2|ERF4|PLDALPHA1|AT3G17410|TMAC2|AT3G02880|RACK1C_AT|ABF4|ZF2|ERF7|UGT71B6|TIC|MBF1C|PMZ|RDUF1|CHL|BT2|SNRK2.2|LTI30|CAM9|NodGS|ARP1|UBA2A|CPK32|SCE1|PRN|HB-12|ROC4|MYB74|FBW2|CPK4|PYL7|SAG21|MPK4|ATC…	-14.8053	4	43	0	0	1	-16.315	1.95869	0.479987
0	0	1	1	1	1	1	1	1	0	0	-2.1116	-5.31348	-18.1437	-7.09793	-20.3285	-8.69778	-9.49811	GO:0009737	M001111111	7	0.446024	GO Biological Processes	19	response to abscisic acid	19_GO:0050896 response to stimulus	-16.288	1.95869	9.20512	18896	592	2477	152	6.13646	0.482219	814873|815055|815101|815120|816293|816413|816464|816837|817170|817240|817544|817553|817721|817784|817876|817901|817925|818167|818226|818411|818609|818627|818982|819172|819262|819280|819295|819757|819911|819925|820355|820619|820752|820816|821005|821182|821198|821338|821463|821495|821575|821732|821807|822041|822447|823815|823942|823994|824214|824261|824355|824484|824642|824853|824920|824956|825091|…	NRP1|LHCB2.2|GRP-3|ACO3|ERD7|HA1|TAG1|AT2G23070|GP ALPHA 1|CIPK3|ABCG31|AT2G30020|ATX1|AT2G32240|PKT3|RD20|CRL1|BLH1|LOS2|PYL4|PP2C5|DREB2C|MPK6|SAP18|AIB|HB-7|PSI-P|RCI2A|RGLG1|CHIP|SYP121|RSH2|ERF4|PLDALPHA1|AT3G17410|TMAC2|AT3G02880|RACK1C_AT|ABF4|ZF2|ERF7|UGT71B6|TIC|MBF1C|PMZ|RDUF1|CHL|BT2|SNRK2.2|LTI30|CAM9|NodGS|ARP1|UBA2A|CPK32|SCE1|PRN|HB-12|ROC4|MYB74|FBW2|CPK4|PYL7|SAG21|MPK4|ATCES1|CD…	-14.7835	4	43	0	0	0	-16.315	1.95869	0.479987
0	0	0	0	1	0	1	1	1	0	0	0	0	-6.5301	0	-3.03059	-2.70824	-3.8011	GO:0009738	M000010111	4	0.382778	GO Biological Processes	19	abscisic acid-activated signaling pathway	19_GO:0023052 signaling	-4.47133	1.78	4.4148	18896	210	2477	49	1.9782	0.279791	814873|817170|817240|817544|817553|817721|817876|818411|818609|818982|819280|819911|820816|821005|821182|821463|823994|824214|824853|824920|825091|826541|827923|828465|828714|829520|829541|829733|829935|830427|830556|832195|832215|833752|834158|834184|835397|835809|835956|836163|836367|836739|837210|838073|838122|839324|840471|840860|843257	NRP1|GP ALPHA 1|CIPK3|ABCG31|AT2G30020|ATX1|PKT3|PYL4|PP2C5|MPK6|HB-7|RGLG1|PLDALPHA1|AT3G17410|TMAC2|ABF4|BT2|SNRK2.2|UBA2A|CPK32|PRN|CPK4|PYL7|CDPK6|ABI1|AT4G33780|OST1|PLDDELTA|HAT22|PYL5|CIPK15|CPN20|AIP2|AT5G37740|AT5G41560|CIP1|RCAR3|ABI2|EXO70B1|SIZ1|MYB96|AT5G66070|EXO70B2|RHA2A|ABCG40|MAPKKK18|CDPK2|PMI1|AFP1	-3.92597	4	43	0	0	0	-16.315	1.95869	0.479987
0	0	0	0	1	0	1	0	1	0	0	0	0	-6.50001	0	-3.04299	0	-2.01257	GO:0071396	M000010101	3	0.381698	GO Biological Processes	19	cellular response to lipid	19_GO:0050896 response to stimulus	-3.47948	1.48108	3.65978	18896	376	2477	73	2.94711	0.339813	814873|815055|816478|816837|817170|817240|817544|817553|817721|817876|818411|818609|818982|819014|819280|819554|819911|820816|821005|821182|821338|821463|821610|823994|824214|824853|824920|825091|825476|825506|826541|827923|828465|828714|829520|829541|829676|829733|829935|830029|830427|830556|832195|832215|832286|833752|834158|834184|835397|835788|835809|835956|836163|836367|836739|836806|837075|…	NRP1|LHCB2.2|ACO1|AT2G23070|GP ALPHA 1|CIPK3|ABCG31|AT2G30020|ATX1|PKT3|PYL4|PP2C5|MPK6|ARL|HB-7|AT3G03990|RGLG1|PLDALPHA1|AT3G17410|TMAC2|RACK1C_AT|ABF4|UBP14|BT2|SNRK2.2|UBA2A|CPK32|PRN|GID1B|BIL4|CPK4|PYL7|CDPK6|ABI1|AT4G33780|OST1|BSK1|PLDDELTA|HAT22|ROC1|PYL5|CIPK15|CPN20|AIP2|MS1|AT5G37740|AT5G41560|CIP1|RCAR3|GNC|ABI2|EXO70B1|SIZ1|MYB96|AT5G66070|IDD1|UGT74E2|EXO70B2|VIK|RHA2A|ABCG40|ATARC…	-3.07195	4	43	0	0	0	-16.315	1.95869	0.479987
0	0	0	0	1	0	1	1	1	0	0	0	0	-6.20054	0	-2.93632	-2.83844	-2.98345	GO:0071215	M000010111	4	0.361452	GO Biological Processes	19	cellular response to abscisic acid stimulus	19_GO:0050896 response to stimulus	-4.84725	1.75803	4.61931	18896	243	2477	56	2.2608	0.298677	814873|815055|816837|817170|817240|817544|817553|817721|817876|818411|818609|818982|819280|819911|820816|821005|821182|821338|821463|823994|824214|824853|824920|825091|826541|827923|828465|828714|829520|829541|829733|829935|830427|830556|832195|832215|833752|834158|834184|835397|835809|835956|836163|836367|836739|837075|837210|838073|838122|838388|839324|840471|840860|841284|843257|10723114	NRP1|LHCB2.2|AT2G23070|GP ALPHA 1|CIPK3|ABCG31|AT2G30020|ATX1|PKT3|PYL4|PP2C5|MPK6|HB-7|RGLG1|PLDALPHA1|AT3G17410|TMAC2|RACK1C_AT|ABF4|BT2|SNRK2.2|UBA2A|CPK32|PRN|CPK4|PYL7|CDPK6|ABI1|AT4G33780|OST1|PLDDELTA|HAT22|PYL5|CIPK15|CPN20|AIP2|AT5G37740|AT5G41560|CIP1|RCAR3|ABI2|EXO70B1|SIZ1|MYB96|AT5G66070|UGT74E2|EXO70B2|RHA2A|ABCG40|ATARCA|MAPKKK18|CDPK2|PMI1|RACK1B_AT|AFP1|SPHK2	-4.25551	4	43	0	0	0	-16.315	1.95869	0.479987
0	0	0	0	1	0	1	1	1	0	0	0	0	-6.20054	0	-2.93632	-2.83844	-2.98345	GO:0097306	M000010111	4	0.361452	GO Biological Processes	19	cellular response to alcohol	19_GO:0050896 response to stimulus	-4.84725	1.75803	4.61931	18896	243	2477	56	2.2608	0.298677	814873|815055|816837|817170|817240|817544|817553|817721|817876|818411|818609|818982|819280|819911|820816|821005|821182|821338|821463|823994|824214|824853|824920|825091|826541|827923|828465|828714|829520|829541|829733|829935|830427|830556|832195|832215|833752|834158|834184|835397|835809|835956|836163|836367|836739|837075|837210|838073|838122|838388|839324|840471|840860|841284|843257|10723114	NRP1|LHCB2.2|AT2G23070|GP ALPHA 1|CIPK3|ABCG31|AT2G30020|ATX1|PKT3|PYL4|PP2C5|MPK6|HB-7|RGLG1|PLDALPHA1|AT3G17410|TMAC2|RACK1C_AT|ABF4|BT2|SNRK2.2|UBA2A|CPK32|PRN|CPK4|PYL7|CDPK6|ABI1|AT4G33780|OST1|PLDDELTA|HAT22|PYL5|CIPK15|CPN20|AIP2|AT5G37740|AT5G41560|CIP1|RCAR3|ABI2|EXO70B1|SIZ1|MYB96|AT5G66070|UGT74E2|EXO70B2|RHA2A|ABCG40|ATARCA|MAPKKK18|CDPK2|PMI1|RACK1B_AT|AFP1|SPHK2	-4.25551	4	43	0	0	0	-16.315	1.95869	0.479987
0	0	1	1	1	1	1	1	1	0	0	-2.07786	-4.38381	-18.9753	-5.93941	-20.6083	-7.17004	-7.38792	GO:0033993	M001111111	7	0.472586	GO Biological Processes	19	response to lipid	19_GO:0050896 response to stimulus	-13.9571	1.75066	8.31618	18896	780	2477	179	7.22648	0.520251	814873|815055|815101|815120|816012|816293|816413|816464|816478|816837|817170|817212|817240|817544|817553|817721|817784|817876|817901|817925|818167|818213|818226|818411|818438|818609|818627|818982|819014|819172|819262|819280|819295|819554|819757|819911|819925|820355|820609|820619|820752|820816|821005|821182|821198|821338|821463|821495|821575|821610|821732|821807|822041|822447|823815|823942|823994|…	NRP1|LHCB2.2|GRP-3|ACO3|LIP1|ERD7|HA1|TAG1|ACO1|AT2G23070|GP ALPHA 1|BAS1|CIPK3|ABCG31|AT2G30020|ATX1|AT2G32240|PKT3|RD20|CRL1|BLH1|GRF3|LOS2|PYL4|TFIIS|PP2C5|DREB2C|MPK6|ARL|SAP18|AIB|HB-7|PSI-P|AT3G03990|RCI2A|RGLG1|CHIP|SYP121|GRF5|RSH2|ERF4|PLDALPHA1|AT3G17410|TMAC2|AT3G02880|RACK1C_AT|ABF4|ZF2|ERF7|UBP14|UGT71B6|TIC|MBF1C|PMZ|RDUF1|CHL|BT2|SNRK2.2|LTI30|CAM9|NodGS|ARP1|UBA2A|CPK32|SCE1|PRN|H…	-12.6208	4	43	0	0	0	-16.315	1.95869	0.479987
0	0	0	0	1	0	0	0	1	0	0	0	0	-4.24599	0	0	0	-2.56508	GO:1905957	M000010001	2	0.284461	GO Biological Processes	19	regulation of cellular response to alcohol	19_GO:0050789 regulation of biological process	-2.97676	1.79861	3.4513	18896	123	2477	29	1.17077	0.21613	817170|817876|819911|820816|821005|821182|824214|826541|828714|829520|829541|829733|830556|832195|832215|833752|834158|834184|835397|835809|835956|836163|836367|836739|837210|838073|839324|840471|840860	GP ALPHA 1|PKT3|RGLG1|PLDALPHA1|AT3G17410|TMAC2|SNRK2.2|CPK4|ABI1|AT4G33780|OST1|PLDDELTA|CIPK15|CPN20|AIP2|AT5G37740|AT5G41560|CIP1|RCAR3|ABI2|EXO70B1|SIZ1|MYB96|AT5G66070|EXO70B2|RHA2A|MAPKKK18|CDPK2|PMI1	-2.64774	4	43	0	0	0	-16.315	1.95869	0.479987
0	0	1	0	1	0	1	1	1	0	0	-2.20884	0	-12.2073	0	-6.40357	-3.03543	-5.68909	GO:1901701	M001010111	5	0.479987	GO Biological Processes	19	cellular response to oxygen-containing compound	19_GO:0050896 response to stimulus	-8.71023	1.62482	6.35631	18896	662	2477	141	5.69237	0.46554	814873|815055|816248|816478|816623|816837|817170|817240|817544|817553|817721|817876|817923|818411|818609|818973|818982|819010|819014|819244|819280|819554|819911|820263|820355|820364|820752|820789|820816|820956|821005|821170|821182|821338|821463|821610|821625|821717|823994|824214|824405|824853|824880|824920|825091|825476|825506|825648|826515|826541|826728|827086|827773|827786|827923|828053|828090|…	NRP1|LHCB2.2|NTRA|ACO1|PSB29|AT2G23070|GP ALPHA 1|CIPK3|ABCG31|AT2G30020|ATX1|PKT3|LYK5|PYL4|PP2C5|SSI2|MPK6|COS1|ARL|JAR1|HB-7|AT3G03990|RGLG1|MSD1|SYP121|UBP13|ERF4|NAC3|PLDALPHA1|UBC32|AT3G17410|BPM4|TMAC2|RACK1C_AT|ABF4|UBP14|EIN3|CERK1|BT2|SNRK2.2|SYP122|UBA2A|BOP1|CPK32|PRN|GID1B|BIL4|CUL1|NDPK1|CPK4|SGT1B|bHLH104|PCAP1|LSD1|PYL7|SAG21|RBP-DR1|MPK4|CDPK6|FSD1|ABI1|WRKY11|AT4G33780|OST1|BSK1…	-7.77711	4	43	1	1	0	-16.315	1.95869	0.479987
0	0	0	0	1	0	1	1	1	0	0	0	0	-9.52898	0	-9.44945	-4.15642	-5.08294	GO:0009755	M000010111	4	0.473552	GO Biological Processes	19	hormone-mediated signaling pathway	19_GO:0023052 signaling	-5.46951	1.47841	4.80173	18896	645	2477	125	5.04643	0.43983	814873|816650|817087|817170|817240|817544|817553|817721|817876|818265|818411|818609|818973|818982|819010|819014|819244|819280|819314|819911|820355|820364|820752|820789|820816|821005|821182|821463|821575|821610|821625|822041|822593|823749|823994|824214|824405|824468|824853|824880|824920|825091|825476|825506|825648|826541|826601|826728|827463|827774|827786|827923|828151|828465|828714|829282|829520|…	NRP1|XCT|EBF1|GP ALPHA 1|CIPK3|ABCG31|AT2G30020|ATX1|PKT3|ABCB1|PYL4|PP2C5|SSI2|MPK6|COS1|ARL|JAR1|HB-7|ABCB4|RGLG1|SYP121|UBP13|ERF4|NAC3|PLDALPHA1|AT3G17410|TMAC2|ABF4|ERF7|UBP14|EIN3|MBF1C|AHP2|RABE1c|BT2|SNRK2.2|SYP122|STV1|UBA2A|BOP1|CPK32|PRN|GID1B|BIL4|CUL1|CPK4|CNX7|SGT1B|ERF6|BAM3|LSD1|PYL7|MPK4|CDPK6|ABI1|WRKY11|AT4G33780|OST1|BSK1|PLDDELTA|MYB73|HAT22|ROC1|PYL5|AT5G05600|UBP12|CIPK15|J…	-4.80918	4	43	0	0	0	-16.315	1.95869	0.479987
0	0	0	0	1	0	0	0	1	0	0	0	0	-4.24599	0	0	0	-2.56508	GO:1901419	M000010001	2	0.284461	GO Biological Processes	19	regulation of response to alcohol	19_GO:0050789 regulation of biological process	-2.97676	1.79861	3.4513	18896	123	2477	29	1.17077	0.21613	817170|817876|819911|820816|821005|821182|824214|826541|828714|829520|829541|829733|830556|832195|832215|833752|834158|834184|835397|835809|835956|836163|836367|836739|837210|838073|839324|840471|840860	GP ALPHA 1|PKT3|RGLG1|PLDALPHA1|AT3G17410|TMAC2|SNRK2.2|CPK4|ABI1|AT4G33780|OST1|PLDDELTA|CIPK15|CPN20|AIP2|AT5G37740|AT5G41560|CIP1|RCAR3|ABI2|EXO70B1|SIZ1|MYB96|AT5G66070|EXO70B2|RHA2A|MAPKKK18|CDPK2|PMI1	-2.64774	4	43	0	0	0	-16.315	1.95869	0.479987
0	0	0	0	1	0	1	1	1	0	0	0	0	-5.70982	0	-4.56072	-2.60045	-2.81369	GO:0023051	M000010111	4	0.373323	GO Biological Processes	19	regulation of signaling	19_GO:0023052 signaling	-4.95619	2.4235	5.05891	18896	339	667	29	4.34783	0.789624	817087|817170|820752|820816|821005|821182|822593|823935|824214|829880|832607|834545|835379|835397|836163|836865|838073|838310|838501|838565|840471|840860|841486|842281|843407|843693|843834|843864|844193	EBF1|GP ALPHA 1|ERF4|PLDALPHA1|AT3G17410|TMAC2|AHP2|MAG1|SNRK2.2|MYB73|EBF2|NPR3|TAP46|RCAR3|SIZ1|MYBR1|RHA2A|JAZ5|JAZ1|PUP14|CDPK2|PMI1|ERF3|PEN3|TIFY7|PIN1|TIFY10B|DHAR2|RHM1	-4.35282	10	44	0	0	1	-4.95619	2.78908	0.383626
0	0	0	0	1	0	1	0	1	0	0	0	0	-3.16956	0	-2.0724	0	-2.36919	GO:1905959	M000010101	3	0.243764	GO Biological Processes	19	positive regulation of cellular response to alcohol	19_GO:0048518 positive regulation of biological process	-3.53699	2.78908	4.23155	18896	50	1897	14	0.738007	0.196512	817170|817876|819911|820816|821005|824214|829541|829733|833752|834184|835397|838073|839324|840471	GP ALPHA 1|PKT3|RGLG1|PLDALPHA1|AT3G17410|SNRK2.2|OST1|PLDDELTA|AT5G37740|CIP1|RCAR3|RHA2A|MAPKKK18|CDPK2	-3.11939	6	44	0	0	0	-4.95619	2.78908	0.383626
0	0	0	0	1	0	1	0	1	0	0	0	0	-3.16956	0	-2.0724	0	-2.36919	GO:1901421	M000010101	3	0.243764	GO Biological Processes	19	positive regulation of response to alcohol	19_GO:0048518 positive regulation of biological process	-3.53699	2.78908	4.23155	18896	50	1897	14	0.738007	0.196512	817170|817876|819911|820816|821005|824214|829541|829733|833752|834184|835397|838073|839324|840471	GP ALPHA 1|PKT3|RGLG1|PLDALPHA1|AT3G17410|SNRK2.2|OST1|PLDDELTA|AT5G37740|CIP1|RCAR3|RHA2A|MAPKKK18|CDPK2	-3.11939	6	44	0	0	0	-4.95619	2.78908	0.383626
0	0	0	0	1	0	1	0	1	0	0	0	0	-3.00456	0	-2.49003	0	-2.66094	GO:0023056	M000010101	3	0.250881	GO Biological Processes	19	positive regulation of signaling	19_GO:0048518 positive regulation of biological process	-4.17776	2.32101	4.49078	18896	103	1897	24	1.26516	0.25661	817170|817876|819911|820816|821005|821338|824115|824214|825476|829541|829733|829880|833752|834184|835379|835397|836865|838073|838388|838544|839324|840471|841284|843864	GP ALPHA 1|PKT3|RGLG1|PLDALPHA1|AT3G17410|RACK1C_AT|NAC062|SNRK2.2|GID1B|OST1|PLDDELTA|MYB73|AT5G37740|CIP1|TAP46|RCAR3|MYBR1|RHA2A|ATARCA|DHAR1|MAPKKK18|CDPK2|RACK1B_AT|DHAR2	-3.67208	6	44	0	0	0	-4.95619	2.78908	0.383626
0	0	0	0	1	0	1	0	1	0	0	0	0	-3.05354	0	-2.52534	0	-2.70767	GO:0009967	M000010101	3	0.254907	GO Biological Processes	19	positive regulation of signal transduction	19_GO:0048518 positive regulation of biological process	-4.25014	2.34376	4.54578	18896	102	1897	24	1.26516	0.25661	817170|817876|819911|820816|821005|821338|824115|824214|825476|829541|829733|829880|833752|834184|835379|835397|836865|838073|838388|838544|839324|840471|841284|843864	GP ALPHA 1|PKT3|RGLG1|PLDALPHA1|AT3G17410|RACK1C_AT|NAC062|SNRK2.2|GID1B|OST1|PLDDELTA|MYB73|AT5G37740|CIP1|TAP46|RCAR3|MYBR1|RHA2A|ATARCA|DHAR1|MAPKKK18|CDPK2|RACK1B_AT|DHAR2	-3.73529	6	44	0	0	0	-4.95619	2.78908	0.383626
0	0	0	0	1	0	1	0	1	0	0	0	0	-3.29927	0	-2.85572	0	-2.52554	GO:0010647	M000010101	3	0.269674	GO Biological Processes	19	positive regulation of cell communication	19_GO:0048518 positive regulation of biological process	-4.41933	2.34929	4.65361	18896	106	1897	25	1.31787	0.261832	816050|817170|817876|819911|820816|821005|821338|824115|824214|825476|829541|829733|829880|833752|834184|835379|835397|836865|838073|838388|838544|839324|840471|841284|843864	ATHM3|GP ALPHA 1|PKT3|RGLG1|PLDALPHA1|AT3G17410|RACK1C_AT|NAC062|SNRK2.2|GID1B|OST1|PLDDELTA|MYB73|AT5G37740|CIP1|TAP46|RCAR3|MYBR1|RHA2A|ATARCA|DHAR1|MAPKKK18|CDPK2|RACK1B_AT|DHAR2	-3.88108	6	44	0	0	0	-4.95619	2.78908	0.383626
0	0	0	0	1	0	1	1	1	0	0	0	0	-5.96048	0	-4.86373	-2.55389	-2.49818	GO:0010646	M000010111	4	0.383626	GO Biological Processes	19	regulation of cell communication	19_GO:0050789 regulation of biological process	-4.46093	2.3194	4.71006	18896	342	667	28	4.1979	0.776499	817087|817170|820752|820816|821005|821182|822593|824214|829880|832607|834545|835379|835397|836163|836865|838073|838310|838501|838565|840471|840860|841486|842281|843407|843693|843834|843864|844193	EBF1|GP ALPHA 1|ERF4|PLDALPHA1|AT3G17410|TMAC2|AHP2|SNRK2.2|MYB73|EBF2|NPR3|TAP46|RCAR3|SIZ1|MYBR1|RHA2A|JAZ5|JAZ1|PUP14|CDPK2|PMI1|ERF3|PEN3|TIFY7|PIN1|TIFY10B|DHAR2|RHM1	-3.91801	10	44	1	1	0	-4.95619	2.78908	0.383626
0	0	0	0	1	0	1	1	1	0	0	0	0	-5.93678	0	-4.7214	-2.69594	-2.71003	GO:0009966	M000010111	4	0.38008	GO Biological Processes	19	regulation of signal transduction	19_GO:0023052 signaling	-4.6694	2.38209	4.86731	18896	333	667	28	4.1979	0.776499	817087|817170|820752|820816|821005|821182|822593|824214|829880|832607|834545|835379|835397|836163|836865|838073|838310|838501|838565|840471|840860|841486|842281|843407|843693|843834|843864|844193	EBF1|GP ALPHA 1|ERF4|PLDALPHA1|AT3G17410|TMAC2|AHP2|SNRK2.2|MYB73|EBF2|NPR3|TAP46|RCAR3|SIZ1|MYBR1|RHA2A|JAZ5|JAZ1|PUP14|CDPK2|PMI1|ERF3|PEN3|TIFY7|PIN1|TIFY10B|DHAR2|RHM1	-4.09852	10	44	0	0	0	-4.95619	2.78908	0.383626
0	0	0	0	1	0	1	0	1	0	0	0	0	-3.16956	0	-2.0724	0	-2.36919	GO:0009789	M000010101	3	0.243764	GO Biological Processes	19	positive regulation of abscisic acid-activated signaling pathway	19_GO:0048518 positive regulation of biological process	-3.53699	2.78908	4.23155	18896	50	1897	14	0.738007	0.196512	817170|817876|819911|820816|821005|824214|829541|829733|833752|834184|835397|838073|839324|840471	GP ALPHA 1|PKT3|RGLG1|PLDALPHA1|AT3G17410|SNRK2.2|OST1|PLDDELTA|AT5G37740|CIP1|RCAR3|RHA2A|MAPKKK18|CDPK2	-3.11939	6	44	0	0	0	-4.95619	2.78908	0.383626
1	1	0	1	1	1	1	1	1	-2.70343	-2.80812	0	-10.7792	-11.0267	-9.58588	-20.9656	-7.99705	-9.6148	GO:0009414	M110111111	8	0.355622	GO Biological Processes	19	response to water deprivation	19_GO:0050896 response to stimulus	-16.3998	2.19582	9.42492	18896	403	2477	116	4.68308	0.42451	815055|815101|815111|816293|816413|816623|816700|817637|817721|817901|817925|818166|818280|818353|818354|818429|818435|818472|818701|818741|819011|819204|819280|819911|820155|820443|820789|820933|820956|821005|821170|821463|821495|821575|821807|821904|821975|822041|822167|822833|823815|823942|824214|824261|824355|824379|824410|824642|824855|825277|825316|825362|825452|825527|827452|827773|828003|…	LHCB2.2|GRP-3|PGR5|ERD7|HA1|PSB29|RD2|GSTF10|ATX1|RD20|CRL1|PUB23|PAL1|AKR4C8|ChlAKR|WRKY33|LTP2|NF-YB1|CAMBP25|ERD15|AT2G44060|PIP1B|HB-7|RGLG1|MDHAR|SAP5|NAC3|AT3G16800|UBC32|AT3G17410|BPM4|ABF4|ZF2|ERF7|TIC|MYB15|BAM1|MBF1C|AOC1|ERD5|RDUF1|CHL|SNRK2.2|LTI30|CAM9|PSRP2|PUB22|ARP1|AT3G56880|NTMC2T4|PIP1A|HB-12|AtATG18a|CCD1|AT4G17410|PCAP1|AT4G03260|SAG21|HVA22D|RD26|SIP3|OST1|CER9|ALDH3I1|CSDP1…	-14.8834	4	45	0	0	1	-16.3998	2.19582	0.435996
1	1	0	1	1	1	1	1	1	-2.50753	-2.5998	0	-11.0544	-10.9684	-9.62166	-20.9946	-8.2105	-10.3771	GO:0009415	M110111111	8	0.357821	GO Biological Processes	19	response to water	19_GO:0050896 response to stimulus	-15.9667	2.16112	9.26681	18896	413	2477	117	4.72346	0.426246	815055|815101|815111|816293|816413|816623|816700|817637|817721|817901|817925|818166|818280|818353|818354|818429|818435|818472|818701|818741|819011|819204|819280|819911|820155|820443|820789|820933|820956|821005|821170|821463|821495|821575|821807|821904|821975|822041|822167|822833|823815|823942|824214|824261|824355|824379|824410|824642|824855|825277|825316|825362|825452|825527|827452|827773|828003|…	LHCB2.2|GRP-3|PGR5|ERD7|HA1|PSB29|RD2|GSTF10|ATX1|RD20|CRL1|PUB23|PAL1|AKR4C8|ChlAKR|WRKY33|LTP2|NF-YB1|CAMBP25|ERD15|AT2G44060|PIP1B|HB-7|RGLG1|MDHAR|SAP5|NAC3|AT3G16800|UBC32|AT3G17410|BPM4|ABF4|ZF2|ERF7|TIC|MYB15|BAM1|MBF1C|AOC1|ERD5|RDUF1|CHL|SNRK2.2|LTI30|CAM9|PSRP2|PUB22|ARP1|AT3G56880|NTMC2T4|PIP1A|HB-12|AtATG18a|CCD1|AT4G17410|PCAP1|AT4G03260|SAG21|HVA22D|RD26|SIP3|OST1|CER9|ALDH3I1|CSDP1…	-14.4826	4	45	0	0	0	-16.3998	2.19582	0.435996
1	0	1	1	1	1	1	1	1	-2.01033	0	-2.3705	-3.7904	-11.3154	-7.02466	-19.1166	-3.98846	-8.58881	GO:0006970	M101111111	8	0.435594	GO Biological Processes	19	response to osmotic stress	19_GO:0050896 response to stimulus	-13.7297	1.88707	8.35266	18896	570	2477	141	5.69237	0.46554	814724|814873|814896|816149|816293|816464|817575|817901|818116|818333|818353|818354|818429|818562|818701|818982|819056|819126|819172|819204|819700|819757|819925|820020|820091|820264|820414|820443|821170|821182|821463|821495|821732|821784|821904|821930|822117|822188|823531|823994|824120|824214|824355|824379|824642|824855|824920|825277|825362|825376|825399|825415|825452|826884|826916|827452|827773|…	BPC1|NRP1|SPR1|ADC1|ERD7|TAG1|WRKY25|RD20|SRO1|SLT1|AKR4C8|ChlAKR|WRKY33|CYT1|CAMBP25|MPK6|PEN2|AT2G45180|SAP18|PIP1B|RLP30|RCI2A|CHIP|PK1|Fes1A|AT3G10930|ITN1|SAP5|BPM4|TMAC2|ABF4|ZF2|UGT71B6|POP2|MYB15|CYN|ROF1|AT3G25910|J3|BT2|LSU1|SNRK2.2|CAM9|PSRP2|ARP1|AT3G56880|CPK32|NTMC2T4|HB-12|ROC4|AT3G62260|BZIP53|AtATG18a|NUDT7|MYB102|AT4G17410|PCAP1|MPK4|ATCES1|CDPK6|HVA22D|AT4G26630|ATS1|SIP3|VAMP7…	-12.4154	4	45	0	0	0	-16.3998	2.19582	0.435996
0	0	1	1	1	1	1	1	1	0	0	-2.45456	-4.74674	-10.1978	-6.69532	-19.3979	-4.74811	-9.11245	GO:0009651	M001111111	7	0.435996	GO Biological Processes	19	response to salt stress	19_GO:0050896 response to stimulus	-14.0589	1.98595	8.53477	18896	484	2477	126	5.0868	0.441492	814724|814873|814896|816149|816293|816464|817575|817901|818116|818333|818353|818354|818429|818562|818701|818982|819056|819126|819172|819204|819700|819757|819925|820020|820091|820264|820414|821170|821182|821463|821495|821732|821784|821904|821930|822188|823531|823994|824120|824214|824355|824379|824642|824855|824920|825277|825362|825376|825399|825452|826884|827452|827773|828151|828328|828465|828598|…	BPC1|NRP1|SPR1|ADC1|ERD7|TAG1|WRKY25|RD20|SRO1|SLT1|AKR4C8|ChlAKR|WRKY33|CYT1|CAMBP25|MPK6|PEN2|AT2G45180|SAP18|PIP1B|RLP30|RCI2A|CHIP|PK1|Fes1A|AT3G10930|ITN1|BPM4|TMAC2|ABF4|ZF2|UGT71B6|POP2|MYB15|CYN|AT3G25910|J3|BT2|LSU1|SNRK2.2|CAM9|PSRP2|ARP1|AT3G56880|CPK32|NTMC2T4|HB-12|ROC4|AT3G62260|AtATG18a|NUDT7|AT4G17410|PCAP1|MPK4|ATCES1|CDPK6|HVA22D|AT4G26630|SIP3|VAMP711|OST1|ADC2|CSDP1|MYB73|RPN1…	-12.7141	4	45	1	1	0	-16.3998	2.19582	0.435996
0	0	0	0	1	0	1	0	1	0	0	0	0	-6.54827	0	-4.99486	0	-2.71305	GO:0070647	M000010101	3	0.412535	GO Biological Processes	19	protein modification by small protein conjugation or removal	19_GO:0008152 metabolic process	-4.10527	1.5053	4.07565	18896	796	1372	87	6.34111	0.657931	814805|817087|817111|817241|817562|818132|818166|818179|819383|819684|819720|819911|819925|820016|820458|820543|820956|821170|821357|821545|821737|821738|823815|823962|823994|824410|824422|824613|824880|824956|825333|825648|825654|825847|825880|826738|827049|827466|828148|828626|828791|828909|829496|829556|829833|829915|830548|831899|832018|832053|832184|832607|832645|834224|834314|834545|834663|…	UBC2|EBF1|SK3|FUS12|UBA1|UBQ7|PUB23|MMZ3|RFI2|ATL6|AT3G05545|RGLG1|CHIP|UBC11|AT3G12760|AT3G13430|UBC32|BPM4|BTS|UBC19|SK8|SK7|RDUF1|AT3G48070|BT2|PUB22|UEV1D-4|SKIP5|BOP1|SCE1|POB1|CUL1|RMA1|UBQ11|UBQ10|RHA1B|COP9|UCH3|UBQ14|RIN2|SUMO1|UBC9|AT4G33565|CER9|RCE1|BT5|UBP12|UBQ3|BPM1|ARIA|UBQ4|EBF2|PEX4|AT5G42190|UBC18|NPR3|CUL4|UBC10|SUMO2|UBC30|AT5G57035|SKIP1|AT5G59140|RDUF2|SIZ1|UBC3|BT1|NFXL1|A…	-3.6075	7	46	1	1	0	-12.6788	14.7313	0.412535
0	1	1	0	0	1	0	0	1	0	-3.39676	-3.47469	0	0	-2.88415	0	0	-2.89681	ath04120	M011001001	4	0.286606	KEGG Pathway	24	Ubiquitin mediated proteolysis		-6.06677	3.16834	6.02001	18896	142	966	23	2.38095	0.490517	814805|817111|817562|819925|820016|820956|821545|821737|821738|824956|825648|829833|834314|834663|835159|835714|836032|836374|838002|838260|838300|843928|844224	UBC2|SK3|UBA1|CHIP|UBC11|UBC32|UBC19|SK8|SK7|SCE1|CUL1|RCE1|UBC18|CUL4|UBC27|UBC30|AT5G59140|UBC3|UBC1|UBC36|UBC34|SKP1|UBC35	-5.34647	9	46	0	0	0	-12.6788	14.7313	0.412535
1	1	1	0	1	1	0	0	1	-2.95024	-5.55278	-4.36778	0	-4.71192	-4.08724	0	0	-6.76013	GO:0061631	M111011001	6	0.321986	GO Molecular Functions	21	ubiquitin conjugating enzyme activity		-12.6788	14.7313	13.5584	18896	41	438	14	3.19635	0.840496	814805|818179|820016|820956|829833|832645|834314|835159|835411|835714|838002|838300|838935|844224	UBC2|MMZ3|UBC11|UBC32|RCE1|PEX4|UBC18|UBC27|UBC10|UBC30|UBC1|UBC34|MMZ1|UBC35	-11.4614	12	46	0	0	1	-12.6788	14.7313	0.412535
0	0	0	0	1	0	1	0	1	0	0	0	0	-6.6162	0	-4.36101	0	-2.86144	GO:0019787	M000010101	3	0.406286	GO Molecular Functions	21	ubiquitin-like protein transferase activity		-3.82459	2.29578	4.29041	18896	451	438	24	5.47945	1.08741	814805|817562|818166|818179|820016|820956|824410|824451|825648|828626|829833|832645|834314|835159|835411|835714|836163|838002|838073|838260|838300|838513|838935|844224	UBC2|UBA1|PUB23|MMZ3|UBC11|UBC32|PUB22|VSR1|CUL1|RIN2|RCE1|PEX4|UBC18|UBC27|UBC10|UBC30|SIZ1|UBC1|RHA2A|UBC36|UBC34|AT1G19310|MMZ1|UBC35	-3.36585	12	46	0	0	0	-12.6788	14.7313	0.412535
0	1	0	0	1	0	0	0	1	0	-2.21228	0	0	-2.16238	0	0	0	-3.11295	GO:0000209	M010010001	3	0.237475	GO Biological Processes	19	protein polyubiquitination	19_GO:0008152 metabolic process	-6.63832	3.95383	6.66377	18896	94	966	19	1.96687	0.446772	814805|818179|819911|819925|820016|820956|821545|824422|829833|832645|834314|834663|835411|835714|836374|838002|838300|838935|844224	UBC2|MMZ3|RGLG1|CHIP|UBC11|UBC32|UBC19|UEV1D-4|RCE1|PEX4|UBC18|CUL4|UBC10|UBC30|UBC3|UBC1|UBC34|MMZ1|UBC35	-5.86471	9	46	0	0	0	-12.6788	14.7313	0.412535
0	1	1	0	0	1	0	0	1	0	-3.39676	-3.47469	0	0	-2.88415	0	0	-2.89681	ko04120	M011001001	4	0.286606	KEGG Pathway	24	Ubiquitin mediated proteolysis		-6.06677	3.16834	6.02001	18896	142	966	23	2.38095	0.490517	814805|817111|817562|819925|820016|820956|821545|821737|821738|824956|825648|829833|834314|834663|835159|835714|836032|836374|838002|838260|838300|843928|844224	UBC2|SK3|UBA1|CHIP|UBC11|UBC32|UBC19|SK8|SK7|SCE1|CUL1|RCE1|UBC18|CUL4|UBC27|UBC30|AT5G59140|UBC3|UBC1|UBC36|UBC34|SKP1|UBC35	-5.34647	9	46	0	0	0	-12.6788	14.7313	0.412535
0	0	0	0	1	0	1	0	0	0	0	0	0	-5.57112	0	-4.6974	0	0	GO:0016567	M000010100	2	0.378038	GO Biological Processes	19	protein ubiquitination	19_GO:0008152 metabolic process	-3.45862	1.60149	3.71921	18896	684	966	56	5.7971	0.751881	814805|817087|817111|817562|818132|818166|818179|819684|819720|819911|819925|820016|820458|820956|821545|821737|821738|823815|824410|824422|824613|824880|825333|825648|825847|825880|826738|828626|829556|829833|831899|832018|832053|832184|832607|832645|834314|834545|834663|835411|835714|835901|836032|836374|836437|838002|838073|838156|838300|838935|840023|841122|842687|843928|844178|844224	UBC2|EBF1|SK3|UBA1|UBQ7|PUB23|MMZ3|ATL6|AT3G05545|RGLG1|CHIP|UBC11|AT3G12760|UBC32|UBC19|SK8|SK7|RDUF1|PUB22|UEV1D-4|SKIP5|BOP1|POB1|CUL1|UBQ11|UBQ10|RHA1B|RIN2|CER9|RCE1|UBQ3|BPM1|ARIA|UBQ4|EBF2|PEX4|UBC18|NPR3|CUL4|UBC10|UBC30|SKIP1|AT5G59140|UBC3|BT1|UBC1|RHA2A|AT1G15860|UBC34|MMZ1|RUB1|RD21A|AT1G63840|SKP1|AT1G78420|UBC35	-3.05333	9	46	0	0	0	-12.6788	14.7313	0.412535
0	0	0	0	1	0	1	0	1	0	0	0	0	-5.48945	0	-4.82444	0	-2.50909	GO:0032446	M000010101	3	0.383093	GO Biological Processes	19	protein modification by small protein conjugation	19_GO:0008152 metabolic process	-4.31742	1.68297	4.30245	18896	709	966	61	6.3147	0.782571	814805|817087|817111|817562|818132|818166|818179|819684|819720|819911|819925|820016|820458|820956|821545|821737|821738|823815|824410|824422|824613|824880|824956|825333|825648|825847|825880|826738|828626|828791|828909|829556|829833|831899|832018|832053|832184|832607|832645|834314|834545|834663|835411|835714|835901|836032|836163|836374|836437|838002|838073|838156|838300|838935|839644|840023|841122|…	UBC2|EBF1|SK3|UBA1|UBQ7|PUB23|MMZ3|ATL6|AT3G05545|RGLG1|CHIP|UBC11|AT3G12760|UBC32|UBC19|SK8|SK7|RDUF1|PUB22|UEV1D-4|SKIP5|BOP1|SCE1|POB1|CUL1|UBQ11|UBQ10|RHA1B|RIN2|SUMO1|UBC9|CER9|RCE1|UBQ3|BPM1|ARIA|UBQ4|EBF2|PEX4|UBC18|NPR3|CUL4|UBC10|UBC30|SKIP1|AT5G59140|SIZ1|UBC3|BT1|UBC1|RHA2A|AT1G15860|UBC34|MMZ1|AT1G27530|RUB1|RD21A|AT1G63840|SKP1|AT1G78420|UBC35	-3.79113	9	46	0	0	0	-12.6788	14.7313	0.412535
0	0	0	0	1	0	1	0	1	0	0	0	0	-6.48093	0	-4.16139	0	-2.33861	GO:0004842	M000010101	3	0.399057	GO Molecular Functions	21	ubiquitin-protein transferase activity		-3.50772	2.22979	4.04407	18896	445	438	23	5.25114	1.0658	814805|817562|818166|818179|820016|820956|824410|824451|825648|828626|829833|832645|834314|835159|835411|835714|838002|838073|838260|838300|838513|838935|844224	UBC2|UBA1|PUB23|MMZ3|UBC11|UBC32|PUB22|VSR1|CUL1|RIN2|RCE1|PEX4|UBC18|UBC27|UBC10|UBC30|UBC1|RHA2A|UBC36|UBC34|AT1G19310|MMZ1|UBC35	-3.09462	12	46	0	0	0	-12.6788	14.7313	0.412535
1	1	1	0	1	1	0	0	1	-2.87113	-6.23479	-4.23553	0	-4.59486	-4.75641	0	0	-7.46161	GO:0061650	M111011001	6	0.340411	GO Molecular Functions	21	ubiquitin-like protein conjugating enzyme activity		-12.5119	14.3805	13.3725	18896	42	438	14	3.19635	0.840496	814805|818179|820016|820956|829833|832645|834314|835159|835411|835714|838002|838300|838935|844224	UBC2|MMZ3|UBC11|UBC32|RCE1|PEX4|UBC18|UBC27|UBC10|UBC30|UBC1|UBC34|MMZ1|UBC35	-11.313	12	46	0	0	0	-12.6788	14.7313	0.412535
1	1	1	0	0	1	0	0	1	-3.00511	-4.99307	-2.92542	0	0	-4.36891	0	0	-4.74426	GO:0045261	M111001001	5	0.332343	GO Cellular Components	20	proton-transporting ATP synthase complex, catalytic core F(1)		-7.65991	7.6623	8.02705	18896	13	1897	10	0.527148	0.166259	815374|825797|826551|827987|830768|830769|830770|831186|834749|841590	AT2G07698|ATPC1|ATPD|AT4G00895|AT5G08670|AT5G08680|AT5G08690|ATP5|AT5G47030|AT1G51650	-6.8079	6	47	0	0	0	-18.8231	17.8925	0.478776
0	0	0	1	0	0	0	1	1	0	0	0	-2.33274	0	0	0	-9.03457	-6.63973	GO:0042626	M000100011	3	0.478776	GO Molecular Functions	21	ATPase activity, coupled to transmembrane movement of substances		-5.29339	3.63072	5.79053	18896	202	438	17	3.88128	0.922899	815343|815374|816413|825042|825513|826716|828471|829142|829490|830047|830770|831186|834430|834749|841590|842281|844228	AT2G07671|AT2G07698|HA1|AT3G58730|AT3G63380|TUF|VAG2|HA2|PAA1|VHA-C3|AT5G08690|ATP5|CAD1|AT5G47030|AT1G51650|PEN3|VHA-A	-4.6526	12	47	1	1	0	-18.8231	17.8925	0.478776
0	0	0	1	0	0	0	1	1	0	0	0	-2.33274	0	0	0	-9.03457	-6.63973	GO:0043492	M000100011	3	0.478776	GO Molecular Functions	21	ATPase activity, coupled to movement of substances		-5.29339	3.63072	5.79053	18896	202	438	17	3.88128	0.922899	815343|815374|816413|825042|825513|826716|828471|829142|829490|830047|830770|831186|834430|834749|841590|842281|844228	AT2G07671|AT2G07698|HA1|AT3G58730|AT3G63380|TUF|VAG2|HA2|PAA1|VHA-C3|AT5G08690|ATP5|CAD1|AT5G47030|AT1G51650|PEN3|VHA-A	-4.6526	12	47	0	0	0	-18.8231	17.8925	0.478776
1	1	1	0	0	1	0	0	1	-2.19225	-8.02844	-8.5719	0	0	-11.8693	0	0	-10.2514	GO:0005753	M111001001	5	0.462143	GO Cellular Components	20	mitochondrial proton-transporting ATP synthase complex		-12.8652	17.8925	14.0916	18896	19	667	12	1.7991	0.514662	815343|816723|823793|824395|829069|829124|830768|830770|831186|834749|836081|841590	AT2G07671|MGP1|AT3G46430|ATPQ|AT4G29480|AT4G30010|AT5G08670|AT5G08690|ATP5|AT5G47030|AT5G59613|AT1G51650	-11.6327	10	47	0	0	0	-18.8231	17.8925	0.478776
0	1	0	1	0	0	0	1	1	0	-2.31365	0	-2.34142	0	0	0	-8.63033	-5.85358	GO:0015405	M010100011	4	0.451815	GO Molecular Functions	21	P-P-bond-hydrolysis-driven transmembrane transporter activity		-6.05543	2.08074	5.44784	18896	225	1897	47	2.4776	0.35689	815343|815374|816413|816988|817101|817429|818520|819314|820003|820236|820496|821130|823906|825042|825513|825797|826551|826716|827922|827987|828471|828594|829112|829142|829490|830047|830063|830144|830769|830770|831186|834094|834420|834430|834509|834749|837280|838122|838138|838327|839248|839378|839920|841575|841590|842281|844228	AT2G07671|AT2G07698|HA1|HA5|AT2G25610|ALB3|ABCG1|ABCB4|VHA-E2|NAP7|ABCC3|VMA10|MDH|AT3G58730|AT3G63380|ATPC1|ATPD|TUF|AGY1|AT4G00895|VAG2|AT4G24920|ACA10|HA2|PAA1|VHA-C3|VHA-A3|ABCD1|AT5G08680|AT5G08690|ATP5|TOM20-4|TOM22-V|CAD1|RAN1|AT5G47030|ECA4|ABCG40|AVP1|TIM23-1|TOC33|ABCI18|ABCC1|ABCG12|AT1G51650|PEN3|VHA-A	-5.33578	6	47	0	0	0	-18.8231	17.8925	0.478776
0	1	0	1	0	0	0	1	1	0	-2.28774	0	-2.32456	0	0	0	-8.58655	-5.8042	GO:0015399	M010100011	4	0.450829	GO Molecular Functions	21	primary active transmembrane transporter activity		-5.99788	2.07153	5.41356	18896	226	1897	47	2.4776	0.35689	815343|815374|816413|816988|817101|817429|818520|819314|820003|820236|820496|821130|823906|825042|825513|825797|826551|826716|827922|827987|828471|828594|829112|829142|829490|830047|830063|830144|830769|830770|831186|834094|834420|834430|834509|834749|837280|838122|838138|838327|839248|839378|839920|841575|841590|842281|844228	AT2G07671|AT2G07698|HA1|HA5|AT2G25610|ALB3|ABCG1|ABCB4|VHA-E2|NAP7|ABCC3|VMA10|MDH|AT3G58730|AT3G63380|ATPC1|ATPD|TUF|AGY1|AT4G00895|VAG2|AT4G24920|ACA10|HA2|PAA1|VHA-C3|VHA-A3|ABCD1|AT5G08680|AT5G08690|ATP5|TOM20-4|TOM22-V|CAD1|RAN1|AT5G47030|ECA4|ABCG40|AVP1|TIM23-1|TOC33|ABCI18|ABCC1|ABCG12|AT1G51650|PEN3|VHA-A	-5.28269	6	47	0	0	0	-18.8231	17.8925	0.478776
1	1	1	0	0	1	0	1	1	-4.02374	-11.4435	-7.87292	0	0	-11.3511	0	-2.1094	-9.63821	GO:0045259	M111001011	6	0.430912	GO Cellular Components	20	proton-transporting ATP synthase complex		-14.5902	7.88578	11.2758	18896	24	1897	19	1.00158	0.228625	815343|815374|816723|823793|824395|825797|826551|827987|828727|829069|829124|829359|830768|830769|830770|831186|834749|836081|841590	AT2G07671|AT2G07698|MGP1|AT3G46430|ATPQ|ATPC1|ATPD|AT4G00895|AT4G26210|AT4G29480|AT4G30010|PDE334|AT5G08670|AT5G08680|AT5G08690|ATP5|AT5G47030|AT5G59613|AT1G51650	-13.2076	6	47	0	0	0	-18.8231	17.8925	0.478776
0	1	1	1	0	1	0	1	1	0	-3.70002	-2.6748	-3.97591	0	-3.06804	0	-7.87311	-6.06551	GO:0042625	M011101011	6	0.363565	GO Molecular Functions	21	ATPase coupled ion transmembrane transporter activity		-9.1672	7.79667	9.55926	18896	83	438	15	3.42466	0.86897	815343|815374|816413|825042|825513|826716|829142|829490|830047|830770|831186|834430|834749|841590|844228	AT2G07671|AT2G07698|HA1|AT3G58730|AT3G63380|TUF|HA2|PAA1|VHA-C3|AT5G08690|ATP5|CAD1|AT5G47030|AT1G51650|VHA-A	-8.19944	12	47	0	0	0	-18.8231	17.8925	0.478776
1	1	1	0	0	1	0	1	1	-4.17425	-6.89074	-2.77527	0	0	-2.81456	0	-2.17712	-8.75393	GO:0033178	M111001011	6	0.4045	GO Cellular Components	20	proton-transporting two-sector ATPase complex, catalytic domain		-10.0827	6.11967	8.79821	18896	23	2148	16	0.744879	0.185525	815374|820003|825797|826551|826716|827987|830768|830769|830770|831186|834749|838614|841590|842725|843934|844228	AT2G07698|VHA-E2|ATPC1|ATPD|TUF|AT4G00895|AT5G08670|AT5G08680|AT5G08690|ATP5|AT5G47030|VAB3|AT1G51650|VHA-E3|VAB1|VHA-A	-9.04116	5	47	0	0	0	-18.8231	17.8925	0.478776
1	1	1	0	0	1	0	1	1	-2.54614	-7.7905	-3.17036	0	0	-3.76474	0	-2.7836	-4.01013	GO:0046933	M111001011	6	0.347684	GO Molecular Functions	21	proton-transporting ATP synthase activity, rotational mechanism		-8.90096	7.47074	8.64985	18896	16	1897	12	0.632578	0.182031	815343|815374|821130|825797|826551|827987|830769|830770|831186|834749|841590|844228	AT2G07671|AT2G07698|VMA10|ATPC1|ATPD|AT4G00895|AT5G08680|AT5G08690|ATP5|AT5G47030|AT1G51650|VHA-A	-7.94774	6	47	0	0	0	-18.8231	17.8925	0.478776
0	0	0	1	0	0	0	1	1	0	0	0	-5.30683	0	0	0	-3.17472	-2.20447	GO:0006812	M000100011	3	0.348401	GO Biological Processes	19	cation transport	19_GO:0051179 localization	-3.21417	2.21509	3.82698	18896	409	438	21	4.79452	1.02086	815343|815374|816413|824395|825513|826716|828471|828859|829069|829142|829490|830047|830770|831049|831186|832145|832188|834749|840471|841590|842281	AT2G07671|AT2G07698|HA1|ATPQ|AT3G63380|TUF|VAG2|PPI1|AT4G29480|HA2|PAA1|VHA-C3|AT5G08690|AT5G11770|ATP5|BCB|COPT5|AT5G47030|CDPK2|AT1G51650|PEN3	-2.84514	12	47	0	0	0	-18.8231	17.8925	0.478776
0	0	0	1	0	0	0	1	1	0	0	0	-4.85318	0	0	0	-3.21001	-4.30061	GO:0034220	M000100011	3	0.359821	GO Biological Processes	19	ion transmembrane transport	19_GO:0051179 localization	-4.32971	2.60031	4.75576	18896	365	438	22	5.02283	1.04363	815343|815374|816413|820005|824395|824578|825513|826716|828471|828859|829069|829142|829490|830047|830770|831049|831186|832188|834749|836886|840471|841590	AT2G07671|AT2G07698|HA1|AAC1|ATPQ|PUMP1|AT3G63380|TUF|VAG2|PPI1|AT4G29480|HA2|PAA1|VHA-C3|AT5G08690|AT5G11770|ATP5|COPT5|AT5G47030|VDAC2|CDPK2|AT1G51650	-3.80177	12	47	0	0	0	-18.8231	17.8925	0.478776
0	0	0	0	0	0	0	1	1	0	0	0	0	0	0	0	-5.79717	-3.36087	GO:0016887	M000000011	2	0.36131	GO Molecular Functions	21	ATPase activity		-3.87202	1.48707	3.9163	18896	491	2148	83	3.86406	0.41586	815343|815374|816413|816988|817101|817306|817456|817646|818031|818520|818558|819314|819718|820003|820142|820206|820236|820496|821130|823906|824619|825042|825513|825797|826551|826716|827412|827580|827661|827922|827987|828471|828882|829025|829112|829142|829388|829490|829786|830047|830063|830144|830769|830770|831186|832121|832378|833998|834232|834316|834430|834509|834575|834749|835165|835180|835701|…	AT2G07671|AT2G07698|HA1|HA5|AT2G25610|SKD1|ftsh3|VAR2|ABCC2|ABCG1|RCA|ABCB4|RPT5A|VHA-E2|CDC48|SPD1|NAP7|ABCC3|VMA10|MDH|ABCF4|AT3G58730|AT3G63380|ATPC1|ATPD|TUF|CLPR4|CHLI1|ABCE2|AGY1|AT4G00895|VAG2|AT4G27680|RPT2a|ACA10|HA2|AT4G32530|PAA1|CRT1|VHA-C3|VHA-A3|ABCD1|AT5G08680|AT5G08690|ATP5|RPT6A|NCLPP7|AATP1|VAR1|RPT4A|CAD1|RAN1|CLPP4|AT5G47030|CLPC1|ERD1|HSP81-2|AT5G57710|RPT3|ABCF1|ABCF5|FTSH8|…	-3.40618	5	47	0	0	0	-18.8231	17.8925	0.478776
0	0	0	1	0	0	0	1	1	0	0	0	-5.14174	0	0	0	-4.15013	-2.26831	GO:0008324	M000100011	3	0.361348	GO Molecular Functions	21	cation transmembrane transporter activity		-3.83007	2.40282	4.34032	18896	395	438	22	5.02283	1.04363	815343|815374|816413|824395|825042|825513|826716|829069|829142|829490|829939|830047|830770|831186|832188|832703|834430|834749|839916|841590|842281|844228	AT2G07671|AT2G07698|HA1|ATPQ|AT3G58730|AT3G63380|TUF|AT4G29480|HA2|PAA1|AT4G37830|VHA-C3|AT5G08690|ATP5|COPT5|MSS1|CAD1|AT5G47030|ERD4|AT1G51650|PEN3|VHA-A	-3.37004	12	47	0	0	0	-18.8231	17.8925	0.478776
0	0	0	1	0	0	0	1	1	0	0	0	-4.26863	0	0	0	-3.99878	-3.18847	GO:0015078	M000100011	3	0.336694	GO Molecular Functions	21	proton transmembrane transporter activity		-6.61788	4.79351	7.03909	18896	144	438	16	3.65297	0.896407	815343|815374|816413|824395|825042|826716|829069|829142|829939|830047|830770|831186|832703|834749|841590|844228	AT2G07671|AT2G07698|HA1|ATPQ|AT3G58730|TUF|AT4G29480|HA2|AT4G37830|VHA-C3|AT5G08690|ATP5|MSS1|AT5G47030|AT1G51650|VHA-A	-5.84693	12	47	0	0	0	-18.8231	17.8925	0.478776
0	1	1	1	0	1	0	1	1	0	-3.70002	-2.6748	-3.97591	0	-3.06804	0	-7.87311	-6.06551	GO:0022853	M011101011	6	0.363565	GO Molecular Functions	21	active ion transmembrane transporter activity		-9.1672	7.79667	9.55926	18896	83	438	15	3.42466	0.86897	815343|815374|816413|825042|825513|826716|829142|829490|830047|830770|831186|834430|834749|841590|844228	AT2G07671|AT2G07698|HA1|AT3G58730|AT3G63380|TUF|HA2|PAA1|VHA-C3|AT5G08690|ATP5|CAD1|AT5G47030|AT1G51650|VHA-A	-8.19944	12	47	0	0	0	-18.8231	17.8925	0.478776
0	1	1	1	0	1	0	1	1	0	-4.55946	-3.52682	-4.56741	0	-3.75067	0	-8.91919	-7.32778	GO:0019829	M011101011	6	0.366685	GO Molecular Functions	21	cation-transporting ATPase activity		-10.2401	3.92828	8.2579	18896	71	1897	28	1.47601	0.276874	815343|815374|816413|816988|817101|820003|821130|825042|825513|825797|826551|826716|827987|829112|829142|829490|830047|830063|830769|830770|831186|834430|834509|834749|837280|839920|841590|844228	AT2G07671|AT2G07698|HA1|HA5|AT2G25610|VHA-E2|VMA10|AT3G58730|AT3G63380|ATPC1|ATPD|TUF|AT4G00895|ACA10|HA2|PAA1|VHA-C3|VHA-A3|AT5G08680|AT5G08690|ATP5|CAD1|RAN1|AT5G47030|ECA4|ABCC1|AT1G51650|VHA-A	-9.18625	6	47	0	0	0	-18.8231	17.8925	0.478776
1	1	1	1	0	1	0	1	1	-3.97635	-12.8671	-6.95847	-4.04065	0	-6.05381	0	-6.9629	-14.1212	GO:0016469	M111101011	7	0.378207	GO Cellular Components	20	proton-transporting two-sector ATPase complex		-18.8231	6.12984	12.3741	18896	52	1897	32	1.68687	0.295674	815343|815374|816723|817101|820003|821130|823793|824395|825042|825797|826551|826716|827987|828471|828727|829069|829124|829359|829388|830047|830063|830768|830769|830770|831186|834749|836081|838614|841590|843898|843934|844228	AT2G07671|AT2G07698|MGP1|AT2G25610|VHA-E2|VMA10|AT3G46430|ATPQ|AT3G58730|ATPC1|ATPD|TUF|AT4G00895|VAG2|AT4G26210|AT4G29480|AT4G30010|PDE334|AT4G32530|VHA-C3|VHA-A3|AT5G08670|AT5G08680|AT5G08690|ATP5|AT5G47030|AT5G59613|VAB3|AT1G51650|AVA-P4|VAB1|VHA-A	-17.1923	6	47	0	0	1	-18.8231	17.8925	0.478776
0	0	0	1	0	1	0	1	1	0	0	0	-5.63523	0	-2.01812	0	-4.41932	-4.72991	GO:0098660	M000101011	4	0.383109	GO Biological Processes	19	inorganic ion transmembrane transport	19_GO:0051179 localization	-5.19466	3.27876	5.58719	18896	250	438	19	4.3379	0.973358	815343|815374|816413|824395|825513|826716|828471|828859|829069|829142|829490|830047|830770|831049|831186|832188|834749|840471|841590	AT2G07671|AT2G07698|HA1|ATPQ|AT3G63380|TUF|VAG2|PPI1|AT4G29480|HA2|PAA1|VHA-C3|AT5G08690|AT5G11770|ATP5|COPT5|AT5G47030|CDPK2|AT1G51650	-4.5627	12	47	0	0	0	-18.8231	17.8925	0.478776
0	0	0	1	0	0	0	1	1	0	0	0	-5.56568	0	0	0	-4.59535	-3.20595	GO:0022890	M000100011	3	0.383937	GO Molecular Functions	21	inorganic cation transmembrane transporter activity		-4.52944	2.68111	4.91857	18896	354	438	22	5.02283	1.04363	815343|815374|816413|824395|825042|825513|826716|829069|829142|829490|829939|830047|830770|831186|832188|832703|834430|834749|839916|841590|842281|844228	AT2G07671|AT2G07698|HA1|ATPQ|AT3G58730|AT3G63380|TUF|AT4G29480|HA2|PAA1|AT4G37830|VHA-C3|AT5G08690|ATP5|COPT5|MSS1|CAD1|AT5G47030|ERD4|AT1G51650|PEN3|VHA-A	-3.97554	12	47	0	0	0	-18.8231	17.8925	0.478776
0	1	1	1	0	0	0	1	1	0	-6.80892	-2.81733	-3.56497	0	0	0	-6.02609	-6.37198	GO:0044769	M011100011	5	0.390297	GO Molecular Functions	21	ATPase activity, coupled to transmembrane movement of ions, rotational mechanism		-9.74774	5.06495	8.36982	18896	33	2148	19	0.884544	0.202029	815343|815374|817101|820003|821130|825042|825797|826551|826716|827987|830047|830063|830769|830770|831186|834749|841590|842725|844228	AT2G07671|AT2G07698|AT2G25610|VHA-E2|VMA10|AT3G58730|ATPC1|ATPD|TUF|AT4G00895|VHA-C3|VHA-A3|AT5G08680|AT5G08690|ATP5|AT5G47030|AT1G51650|VHA-E3|VHA-A	-8.73289	5	47	0	0	0	-18.8231	17.8925	0.478776
0	1	1	0	0	1	0	1	1	0	-7.41691	-4.72449	0	0	-5.98735	0	-2.32428	-4.93135	GO:0015986	M011001011	5	0.394895	GO Biological Processes	19	ATP synthesis coupled proton transport	19_GO:0051179 localization	-10.5171	7.11499	9.36607	18896	21	1897	15	0.790722	0.203355	815343|815374|824395|825797|826551|827987|828727|829069|829359|830063|830769|830770|831186|834749|841590	AT2G07671|AT2G07698|ATPQ|ATPC1|ATPD|AT4G00895|AT4G26210|AT4G29480|PDE334|VHA-A3|AT5G08680|AT5G08690|ATP5|AT5G47030|AT1G51650	-9.4473	6	47	0	0	0	-18.8231	17.8925	0.478776
0	1	1	0	0	1	0	1	1	0	-7.41691	-4.72449	0	0	-5.98735	0	-2.32428	-4.93135	GO:0015985	M011001011	5	0.394895	GO Biological Processes	19	energy coupled proton transport, down electrochemical gradient	19_GO:0051179 localization	-10.5171	7.11499	9.36607	18896	21	1897	15	0.790722	0.203355	815343|815374|824395|825797|826551|827987|828727|829069|829359|830063|830769|830770|831186|834749|841590	AT2G07671|AT2G07698|ATPQ|ATPC1|ATPD|AT4G00895|AT4G26210|AT4G29480|PDE334|VHA-A3|AT5G08680|AT5G08690|ATP5|AT5G47030|AT1G51650	-9.4473	6	47	0	0	0	-18.8231	17.8925	0.478776
0	0	0	1	0	0	0	1	1	0	0	0	-6.41831	0	0	0	-4.13227	-3.94211	GO:0098655	M000100011	3	0.400731	GO Biological Processes	19	cation transmembrane transport	19_GO:0051179 localization	-5.37351	3.37321	5.73565	18896	243	438	19	4.3379	0.973358	815343|815374|816413|824395|825513|826716|828471|828859|829069|829142|829490|830047|830770|831049|831186|832188|834749|840471|841590	AT2G07671|AT2G07698|HA1|ATPQ|AT3G63380|TUF|VAG2|PPI1|AT4G29480|HA2|PAA1|VHA-C3|AT5G08690|AT5G11770|ATP5|COPT5|AT5G47030|CDPK2|AT1G51650	-4.72388	12	47	0	0	0	-18.8231	17.8925	0.478776
0	0	0	0	0	0	0	1	1	0	0	0	0	0	0	0	-7.07611	-3.85655	GO:0042623	M000000011	2	0.407377	GO Molecular Functions	21	ATPase activity, coupled		-4.03366	1.6212	4.08328	18896	331	2148	61	2.83985	0.358406	815343|815374|816413|816988|817101|817456|817646|818031|818520|819314|820003|820236|820496|821130|823906|825042|825513|825797|826551|826716|827412|827922|827987|828471|829025|829112|829142|829490|830047|830063|830144|830769|830770|831186|832121|832378|834232|834430|834509|834575|834749|835165|835941|837154|837265|837280|837432|837719|837797|838122|839378|839433|839920|841420|841447|841575|841590|…	AT2G07671|AT2G07698|HA1|HA5|AT2G25610|ftsh3|VAR2|ABCC2|ABCG1|ABCB4|VHA-E2|NAP7|ABCC3|VMA10|MDH|AT3G58730|AT3G63380|ATPC1|ATPD|TUF|CLPR4|AGY1|AT4G00895|VAG2|RPT2a|ACA10|HA2|PAA1|VHA-C3|VHA-A3|ABCD1|AT5G08680|AT5G08690|ATP5|RPT6A|NCLPP7|VAR1|CAD1|RAN1|CLPP4|AT5G47030|CLPC1|RPT3|FTSH8|ftsh10|ECA4|AT1G09130|CLPP6|CLP2|ABCG40|ABCI18|CLPP5|ABCC1|CLPR1|FTSH1|ABCG12|AT1G51650|PEN3|VHA-E3|CLPP3|VHA-A	-3.5463	5	47	0	0	0	-18.8231	17.8925	0.478776
0	0	0	1	0	0	0	1	1	0	0	0	-6.34143	0	0	0	-4.56506	-4.57153	GO:0098662	M000100011	3	0.405691	GO Biological Processes	19	inorganic cation transmembrane transport	19_GO:0051179 localization	-5.81078	3.61097	6.09638	18896	227	438	19	4.3379	0.973358	815343|815374|816413|824395|825513|826716|828471|828859|829069|829142|829490|830047|830770|831049|831186|832188|834749|840471|841590	AT2G07671|AT2G07698|HA1|ATPQ|AT3G63380|TUF|VAG2|PPI1|AT4G29480|HA2|PAA1|VHA-C3|AT5G08690|AT5G11770|ATP5|COPT5|AT5G47030|CDPK2|AT1G51650	-5.11729	12	47	0	0	0	-18.8231	17.8925	0.478776
0	1	1	0	0	1	0	0	1	0	-2.63033	-2.95374	0	0	-4.19273	0	0	-4.84765	GO:0000275	M011001001	4	0.345449	GO Cellular Components	20	mitochondrial proton-transporting ATP synthase complex, catalytic core F(1)		-5.51567	7.74744	6.76354	18896	9	1897	7	0.369004	0.139213	825797|830768|830769|830770|831186|834749|841590	ATPC1|AT5G08670|AT5G08680|AT5G08690|ATP5|AT5G47030|AT1G51650	-4.85196	6	47	0	0	0	-18.8231	17.8925	0.478776
0	0	0	1	0	0	0	1	0	0	0	0	-3.84112	0	0	0	-2.20679	0	GO:0015075	M000100010	2	0.255211	GO Molecular Functions	21	ion transmembrane transporter activity		-2.14071	1.67916	2.75303	18896	668	438	26	5.93607	1.12908	815343|815374|816413|820005|824395|824578|825042|825513|826716|829069|829142|829490|829939|830047|830770|831186|832188|832703|832812|834430|834749|836886|839916|841590|842281|844228	AT2G07671|AT2G07698|HA1|AAC1|ATPQ|PUMP1|AT3G58730|AT3G63380|TUF|AT4G29480|HA2|PAA1|AT4G37830|VHA-C3|AT5G08690|ATP5|COPT5|MSS1|PNC2|CAD1|AT5G47030|VDAC2|ERD4|AT1G51650|PEN3|VHA-A	-1.94526	12	47	0	0	0	-18.8231	17.8925	0.478776
0	0	0	1	0	0	0	1	1	0	0	0	-3.51196	0	0	0	-3.16523	-2.52028	GO:0015077	M000100011	3	0.286365	GO Molecular Functions	21	monovalent inorganic cation transmembrane transporter activity		-5.0202	3.63297	5.61889	18896	190	438	16	3.65297	0.896407	815343|815374|816413|824395|825042|826716|829069|829142|829939|830047|830770|831186|832703|834749|841590|844228	AT2G07671|AT2G07698|HA1|ATPQ|AT3G58730|TUF|AT4G29480|HA2|AT4G37830|VHA-C3|AT5G08690|ATP5|MSS1|AT5G47030|AT1G51650|VHA-A	-4.40924	12	47	0	0	0	-18.8231	17.8925	0.478776
0	0	0	1	0	0	0	1	1	0	0	0	-4.63459	0	0	0	-2.51642	-2.364	GO:0006811	M000100011	3	0.312466	GO Biological Processes	19	ion transport	19_GO:0051179 localization	-2.27388	1.70047	2.87664	18896	685	438	27	6.16438	1.14919	815343|815374|816413|820005|824395|824578|825513|826716|828471|828859|829069|829142|829490|830047|830770|831049|831146|831186|832145|832188|832812|834430|834749|836886|840471|841590|842281	AT2G07671|AT2G07698|HA1|AAC1|ATPQ|PUMP1|AT3G63380|TUF|VAG2|PPI1|AT4G29480|HA2|PAA1|VHA-C3|AT5G08690|AT5G11770|AT5G13070|ATP5|BCB|COPT5|PNC2|CAD1|AT5G47030|VDAC2|CDPK2|AT1G51650|PEN3	-2.05834	12	47	0	0	0	-18.8231	17.8925	0.478776
0	1	1	1	0	1	0	1	1	0	-4.76126	-3.60488	-5.08376	0	-3.44638	0	-5.88654	-8.17601	GO:1902600	M011101011	6	0.345818	GO Biological Processes	19	proton transmembrane transport	19_GO:0051179 localization	-10.9358	3.93197	8.55563	18896	76	1897	30	1.58144	0.286439	815343|815374|816413|816988|817101|820003|824395|825797|826551|826716|827987|828471|828727|828859|829069|829142|829359|829388|830047|830063|830769|830770|831049|831186|834749|838138|838614|841590|843898|843934	AT2G07671|AT2G07698|HA1|HA5|AT2G25610|VHA-E2|ATPQ|ATPC1|ATPD|TUF|AT4G00895|VAG2|AT4G26210|PPI1|AT4G29480|HA2|PDE334|AT4G32530|VHA-C3|VHA-A3|AT5G08680|AT5G08690|AT5G11770|ATP5|AT5G47030|AVP1|VAB3|AT1G51650|AVA-P4|VAB1	-9.84079	6	47	0	0	0	-18.8231	17.8925	0.478776
0	1	1	1	0	0	0	1	1	0	-2.63142	-2.284	-4.06269	0	0	0	-3.85451	-4.64399	GO:0015672	M011100011	5	0.321844	GO Biological Processes	19	monovalent inorganic cation transport	19_GO:0051179 localization	-7.2763	3.55656	6.84151	18896	132	966	24	2.48447	0.500801	815343|815374|816413|817101|820003|824395|826716|828471|828727|828859|829069|829142|829388|830047|830770|831049|831186|834749|838138|839349|840471|841590|843898|843934	AT2G07671|AT2G07698|HA1|AT2G25610|VHA-E2|ATPQ|TUF|VAG2|AT4G26210|PPI1|AT4G29480|HA2|AT4G32530|VHA-C3|AT5G08690|AT5G11770|ATP5|AT5G47030|AVP1|CIPK9|CDPK2|AT1G51650|AVA-P4|VAB1	-6.45158	9	47	0	0	0	-18.8231	17.8925	0.478776
0	1	0	1	0	0	0	0	0	0	-2.00334	0	-3.15365	0	0	0	0	0	GO:0004791	M010100000	2	0.212491	GO Molecular Functions	21	thioredoxin-disulfide reductase activity		-2.39883	8.38332	4.5349	18896	7	966	3	0.310559	0.179023	816248|822003|824631	NTRA|GR1|GR	-2.16133	9	48	0	0	0	-5.18666	13.0407	0.2967
0	1	0	1	0	0	0	1	1	0	-4.37993	0	-2.51661	0	0	0	-2.29688	-2.12725	GO:0015037	M010100011	4	0.2967	GO Molecular Functions	21	peptide disulfide oxidoreductase activity		-5.18666	10.6697	7.44598	18896	11	966	6	0.621118	0.252782	822003|824631|836423|838544|843864|844073	GR1|GR|GRXC1|DHAR1|DHAR2|AT1G77370	-4.55583	9	48	1	1	1	-5.18666	13.0407	0.2967
0	1	0	1	0	0	0	0	0	0	-3.47961	0	-3.38757	0	0	0	0	0	GO:0004362	M010100000	2	0.273726	GO Molecular Functions	21	glutathione-disulfide reductase activity		-4.02814	13.0407	6.84674	18896	6	966	4	0.414079	0.20661	822003|824631|836423|844073	GR1|GR|GRXC1|AT1G77370	-3.54202	9	48	0	0	0	-5.18666	13.0407	0.2967
0	1	0	1	0	0	0	1	1	0	-4.37993	0	-2.51661	0	0	0	-2.29688	-2.12725	GO:0015038	M010100011	4	0.2967	GO Molecular Functions	21	glutathione disulfide oxidoreductase activity		-5.18666	10.6697	7.44598	18896	11	966	6	0.621118	0.252782	822003|824631|836423|838544|843864|844073	GR1|GR|GRXC1|DHAR1|DHAR2|AT1G77370	-4.55583	9	48	0	0	0	-5.18666	13.0407	0.2967
0	0	0	1	0	0	0	0	0	0	0	0	-3.3413	0	0	0	0	0	GO:0050660	M000100000	1	0.183503	GO Molecular Functions	21	flavin adenine dinucleotide binding		-2.77382	4.09612	4.08659	18896	156	207	7	3.38164	1.25634	819865|822003|824454|827381|835427|836635|836809	IBR3|GR1|MDAR1|ACX1|GLT1|ACX2|SDH1-1	-2.47823	14	49	0	0	0	-6.46152	26.0814	0.255473
0	0	0	0	0	0	0	0	1	0	0	0	0	0	0	0	0	-2.52378	GO:0001676	M000000001	1	0.128705	GO Biological Processes	19	long-chain fatty acid metabolic process	19_GO:0008152 metabolic process	-4.89113	26.0814	9.88002	18896	14	207	4	1.93237	0.956803	817901|827381|832820|836635	RD20|ACX1|LACS7|ACX2	-4.29539	14	49	0	0	0	-6.46152	26.0814	0.255473
0	0	0	0	0	0	0	1	1	0	0	0	0	0	0	0	-2.33643	-3.76236	GO:0033293	M000000011	2	0.255473	GO Molecular Functions	21	monocarboxylic acid binding		-2.76292	7.76894	4.8898	18896	47	207	4	1.93237	0.956803	827381|834545|835397|836635	ACX1|NPR3|RCAR3|ACX2	-2.46998	14	49	1	1	0	-6.46152	26.0814	0.255473
0	1	1	0	1	0	1	0	0	0	-2.66725	-2.61398	0	-2.18454	0	-2.72765	0	0	GO:0016627	M011010100	4	0.238771	GO Molecular Functions	21	oxidoreductase activity, acting on the CH-CH group of donors		-6.46152	9.78054	8.48807	18896	84	207	9	4.34783	1.41742	815160|819865|821049|822359|827381|835177|836635|836809|844001	OPR3|IBR3|PYD1|SDH2-1|ACX1|SDHAF2|ACX2|SDH1-1|OPR1	-5.70735	14	49	0	0	1	-6.46152	26.0814	0.255473
0	0	0	1	0	0	1	1	0	0	0	0	-5.42189	0	0	-2.01401	-3.65178	0	GO:0071782	M000100110	3	0.359855	GO Cellular Components	20	endoplasmic reticulum tubular network		-2.78039	4.9805	4.20594	18896	10	1897	5	0.263574	0.117718	816633|826724|828463|829235|842713	SYTA|BTI2|BTI1|AT4G31080|RTNLB3	-2.48367	6	50	0	0	0	-3.7239	12.1414	0.428465
0	0	0	1	0	0	1	1	0	0	0	0	-4.70165	0	0	-2.5031	-2.92671	0	GO:0071786	M000100110	3	0.325009	GO Biological Processes	19	endoplasmic reticulum tubular network organization	19_GO:0071840 cellular component organization or biogenesis	-2.86083	12.1414	5.63946	18896	7	667	3	0.449775	0.259093	826724|828463|829235	BTI2|BTI1|AT4G31080	-2.55131	10	50	0	0	0	-3.7239	12.1414	0.428465
0	0	0	1	0	0	1	1	0	0	0	0	-3.98177	0	0	-2.78531	-3.55778	0	GO:0007029	M000100110	3	0.315416	GO Biological Processes	19	endoplasmic reticulum organization	19_GO:0071840 cellular component organization or biogenesis	-2.76745	3.84378	3.97173	18896	28	1229	7	0.569569	0.214663	814908|816633|819122|826724|828463|829235|835225	NMD3|SYTA|PVA12|BTI2|BTI1|AT4G31080|AT5G51510	-2.47282	8	50	0	0	0	-3.7239	12.1414	0.428465
0	0	0	1	0	0	0	1	1	0	0	0	-3.90107	0	0	0	-2.67803	-2.21746	GO:0030176	M000100011	3	0.286452	GO Cellular Components	20	integral component of endoplasmic reticulum membrane		-3.01922	6.61486	4.91743	18896	69	207	5	2.41546	1.0671	826724|828463|829345|830945|843775	BTI2|BTI1|AT4G32130|AT5G10780|DPMS2	-2.68239	14	50	0	0	0	-3.7239	12.1414	0.428465
0	0	0	1	0	0	0	1	1	0	0	0	-3.80391	0	0	0	-2.5987	-2.11686	GO:0031227	M000100011	3	0.279249	GO Cellular Components	20	intrinsic component of endoplasmic reticulum membrane		-2.96298	6.42852	4.82291	18896	71	207	5	2.41546	1.0671	826724|828463|829345|830945|843775	BTI2|BTI1|AT4G32130|AT5G10780|DPMS2	-2.63666	14	50	0	0	0	-3.7239	12.1414	0.428465
0	0	0	1	0	0	0	1	0	0	0	0	-7.51728	0	0	0	-4.59143	0	GO:0031224	M000100010	2	0.428465	GO Cellular Components	20	intrinsic component of membrane		-2.20611	2.01735	2.93767	18896	724	207	16	7.72947	1.85618	816413|819945|824405|824876|825119|825513|826724|828463|829345|830520|830945|832145|832812|834730|836242|843775	HA1|PEX13|SYP122|BIGYIN|AT3G59500|AT3G63380|BTI2|BTI1|AT4G32130|NHL3|AT5G10780|BCB|PNC2|VAM3|SNAP33|DPMS2	-2.00355	14	50	1	1	0	-3.7239	12.1414	0.428465
0	0	1	1	0	0	0	1	1	0	0	-2.63344	-3.20501	0	0	0	-2.79894	-2.35484	GO:0016021	M001100011	4	0.261774	GO Cellular Components	20	integral component of membrane		-3.7239	3.10192	4.53975	18896	412	207	14	6.76329	1.74537	816413|819945|824405|824876|825119|825513|826724|828463|829345|830945|832812|834730|836242|843775	HA1|PEX13|SYP122|BIGYIN|AT3G59500|AT3G63380|BTI2|BTI1|AT4G32130|AT5G10780|PNC2|VAM3|SNAP33|DPMS2	-3.27959	14	50	0	0	1	-3.7239	12.1414	0.428465
0	0	0	0	0	0	1	0	1	0	0	0	0	0	0	-2.21035	0	-2.27914	GO:0098562	M000000101	2	0.169191	GO Cellular Components	20	cytoplasmic side of membrane		-3.20334	10.1428	5.77862	18896	36	207	4	1.93237	0.956803	816502|824649|826724|828463	SNF7.2|ARA6|BTI2|BTI1	-2.83603	14	50	0	0	0	-3.7239	12.1414	0.428465
0	0	0	0	0	1	0	0	0	0	0	0	0	0	-3.20083	0	0	0	GO:0010043	M000001000	1	0.174656	GO Biological Processes	19	response to zinc ion	19_GO:0050896 response to stimulus	-3.45955	3.57561	4.45955	18896	43	1229	10	0.81367	0.256256	817636|819963|820263|827931|829257|831720|838217|838544|842147|842905	GSTF9|AT3G07720|MSD1|GSTF2|PBA1|FER1|PAB1|DHAR1|AT1G57720|cICDH	-3.05389	8	51	1	1	1	-3.45955	3.57561	0.174656
1	1	0	0	1	0	0	0	1	-2.82475	-3.45592	0	0	-4.43748	0	0	0	-2.60059	GO:1901606	M110010001	4	0.319864	GO Biological Processes	19	alpha-amino acid catabolic process	19_GO:0008152 metabolic process	-7.33831	2.93234	6.46948	18896	87	2148	29	1.35009	0.249008	814770|816149|818280|818588|821072|821784|822833|823668|824493|828798|829438|829452|829623|829949|830635|831935|834363|834660|835480|835494|835598|836724|837168|837542|837733|838940|841263|842908|844282	GSTZ1|ADC1|PAL1|HSPRO2|GDH3|POP2|ERD5|IVD|PAL2|AT4G26910|GLDP1|AT4G33150|ADC2|SHM1|GDH2|GDH1|ETFBETA|DELTA-OAT|TAT7|HGO|AT5G55070|CHY1|PDS1|BCAT-1|AT1G11860|GGT1|D-CDES|GAD2|ALDH5F1	-6.5081	5	52	0	0	0	-11.8317	3.00905	0.407494
1	1	0	0	1	0	0	0	1	-2.85285	-2.96856	0	0	-4.90884	0	0	0	-3.0061	GO:0009063	M110010001	4	0.325495	GO Biological Processes	19	cellular amino acid catabolic process	19_GO:0008152 metabolic process	-7.46553	3.00905	6.59239	18896	96	1897	29	1.52873	0.2817	814770|816149|818280|818588|820547|821072|821784|822833|823668|824493|828798|829438|829452|829623|829949|830635|831935|834660|835480|835494|835598|836724|837168|837733|838739|838940|841263|842908|844282	GSTZ1|ADC1|PAL1|HSPRO2|DIN4|GDH3|POP2|ERD5|IVD|PAL2|AT4G26910|GLDP1|AT4G33150|ADC2|SHM1|GDH2|GDH1|DELTA-OAT|TAT7|HGO|AT5G55070|CHY1|PDS1|AT1G11860|AT1G21400|GGT1|D-CDES|GAD2|ALDH5F1	-6.62488	6	52	0	0	0	-11.8317	3.00905	0.407494
0	1	1	0	1	0	1	1	1	0	-4.2062	-4.54299	0	-5.23119	0	-2.07373	-2.19571	-7.86709	GO:0044282	M011010111	6	0.376874	GO Biological Processes	19	small molecule catabolic process	19_GO:0008152 metabolic process	-11.1591	2.41268	7.83762	18896	237	2148	65	3.02607	0.369615	814663|814770|816149|816652|816808|817163|817693|817876|818280|818588|818879|819870|819945|820255|820547|821045|821072|821784|822833|823668|823934|824060|824347|824493|825044|827088|827314|827381|828798|829022|829438|829452|829623|829949|830144|830635|830825|831330|831935|832645|832812|834300|834363|834660|835480|835494|835527|835598|836262|836635|836724|837168|837330|837542|837731|837733|838739|…	QPT|GSTZ1|ADC1|TIM|PMDH1|AT2G26230|GLX2-5|PKT3|PAL1|HSPRO2|CSY3|MFP2|PEX13|GLY2|DIN4|AT3G17770|GDH3|POP2|ERD5|IVD|AT3G47800|AAE3|ACX4|PAL2|CSY2|IBR10|ECHIA|ACX1|AT4G26910|AIM1|GLDP1|AT4G33150|ADC2|SHM1|ABCD1|GDH2|PMDH2|FDH|GDH1|PEX4|PNC2|SCP2|ETFBETA|DELTA-OAT|TAT7|HGO|HL|AT5G55070|RPE|ACX2|CHY1|PDS1|AT1G08110|BCAT-1|GLX1|AT1G11860|AT1G21400|AT1G22430|GGT1|D-CDES|GAD2|AT1G67280|ECH2|ADH1|ALDH5F1	-10.0491	5	52	0	0	0	-11.8317	3.00905	0.407494
0	1	1	0	1	0	1	1	1	0	-4.02708	-6.05599	0	-7.22417	0	-3.11101	-2.01129	-9.15413	GO:0046395	M011010111	6	0.407494	GO Biological Processes	19	carboxylic acid catabolic process	19_GO:0008152 metabolic process	-11.8317	2.95811	8.43907	18896	165	1897	49	2.58303	0.364207	814663|814770|816149|816808|817876|818280|818588|818879|819870|819945|820547|821072|821784|822833|823668|824347|824493|825044|827088|827314|827381|828798|829022|829438|829452|829623|829949|830144|830635|830825|831330|831935|832645|832812|834300|834660|835480|835494|835598|836635|836724|837168|837733|838739|838940|841263|842908|843947|844282	QPT|GSTZ1|ADC1|PMDH1|PKT3|PAL1|HSPRO2|CSY3|MFP2|PEX13|DIN4|GDH3|POP2|ERD5|IVD|ACX4|PAL2|CSY2|IBR10|ECHIA|ACX1|AT4G26910|AIM1|GLDP1|AT4G33150|ADC2|SHM1|ABCD1|GDH2|PMDH2|FDH|GDH1|PEX4|PNC2|SCP2|DELTA-OAT|TAT7|HGO|AT5G55070|ACX2|CHY1|PDS1|AT1G11860|AT1G21400|GGT1|D-CDES|GAD2|ECH2|ALDH5F1	-10.6734	6	52	0	0	0	-11.8317	3.00905	0.407494
0	1	1	0	1	0	1	1	1	0	-4.02708	-6.05599	0	-7.22417	0	-3.11101	-2.01129	-9.15413	GO:0016054	M011010111	6	0.407494	GO Biological Processes	19	organic acid catabolic process	19_GO:0008152 metabolic process	-11.8317	2.95811	8.43907	18896	165	1897	49	2.58303	0.364207	814663|814770|816149|816808|817876|818280|818588|818879|819870|819945|820547|821072|821784|822833|823668|824347|824493|825044|827088|827314|827381|828798|829022|829438|829452|829623|829949|830144|830635|830825|831330|831935|832645|832812|834300|834660|835480|835494|835598|836635|836724|837168|837733|838739|838940|841263|842908|843947|844282	QPT|GSTZ1|ADC1|PMDH1|PKT3|PAL1|HSPRO2|CSY3|MFP2|PEX13|DIN4|GDH3|POP2|ERD5|IVD|ACX4|PAL2|CSY2|IBR10|ECHIA|ACX1|AT4G26910|AIM1|GLDP1|AT4G33150|ADC2|SHM1|ABCD1|GDH2|PMDH2|FDH|GDH1|PEX4|PNC2|SCP2|DELTA-OAT|TAT7|HGO|AT5G55070|ACX2|CHY1|PDS1|AT1G11860|AT1G21400|GGT1|D-CDES|GAD2|ECH2|ALDH5F1	-10.6734	6	52	1	1	1	-11.8317	3.00905	0.407494
0	0	0	0	1	1	1	0	1	0	0	0	0	-2.07232	-3.50922	-4.61079	0	-3.62572	GO:0046982	M000011101	4	0.335506	GO Molecular Functions	21	protein heterodimerization activity		-4.66554	2.94969	5.09671	18896	126	966	19	1.96687	0.446772	816329|818167|818324|818472|819969|820427|823741|823746|825333|825415|830164|832829|835553|836113|837293|837409|841528|841707|28719403	bZIP2|BLH1|AT2G37470|NF-YB1|OBE1|NF-YC11|HTB9|HTB11|POB1|BZIP53|AT4G40030|HTA7|RAT5|HTB4|HTB1|H2AXA|HTA10|HTA9|AT3G53650	-4.09542	9	53	1	1	0	-6.79411	7.65415	0.335506
0	0	1	0	0	1	0	0	0	0	0	-2.56722	0	0	-2.13624	0	0	0	GO:0006325	M001001000	2	0.183756	GO Biological Processes	19	chromatin organization	19_GO:0071840 cellular component organization or biogenesis	-4.31802	2.2386	4.58345	18896	367	667	29	4.34783	0.789624	814805|816263|817721|818324|820213|820572|823741|823746|824351|828770|829709|830498|831267|832829|834032|835553|836113|836867|836873|836894|837187|837293|837409|838002|838659|839529|841528|841707|28719403	UBC2|HMGB4|ATX1|AT2G37470|NAC052|AT3G13670|HTB9|HTB11|HMGB1|AT4G26630|HMGB5|AT5G06110|CHC1|HTA7|AT5G40340|RAT5|HTB4|HOS15|CKA1|TRB2|AT1G06760|HTB1|H2AXA|UBC1|HMGB3|CRY2|HTA10|HTA9|AT3G53650	-3.79159	10	53	0	0	0	-6.79411	7.65415	0.335506
0	0	1	0	1	1	0	0	1	0	0	-2.31654	0	-2.03572	-2.54465	0	0	-2.08456	GO:0071824	M001011001	4	0.211916	GO Biological Processes	19	protein-DNA complex subunit organization	19_GO:0071840 cellular component organization or biogenesis	-4.05746	4.05604	5.10781	18896	117	438	11	2.51142	0.747651	818324|819718|823741|823746|831267|835941|836113|836894|837293|841812|28719403	AT2G37470|RPT5A|HTB9|HTB11|CHC1|RPT3|HTB4|TRB2|HTB1|RPT1A|AT3G53650	-3.56632	12	53	0	0	0	-6.79411	7.65415	0.335506
0	0	1	0	1	1	0	0	1	0	0	-2.5751	0	-2.00497	-2.40486	0	0	-2.4884	GO:0065004	M001011001	4	0.223865	GO Biological Processes	19	protein-DNA complex assembly	19_GO:0071840 cellular component organization or biogenesis	-4.03712	4.4022	5.20158	18896	98	438	10	2.28311	0.713692	818324|819718|823741|823746|835941|836113|836894|837293|841812|28719403	AT2G37470|RPT5A|HTB9|HTB11|RPT3|HTB4|TRB2|HTB1|RPT1A|AT3G53650	-3.54926	12	53	0	0	0	-6.79411	7.65415	0.335506
0	0	1	0	1	1	1	0	1	0	0	-2.81087	0	-2.37788	-3.74222	-2.08441	0	-3.675	GO:0034728	M001011101	5	0.285274	GO Biological Processes	19	nucleosome organization	19_GO:0071840 cellular component organization or biogenesis	-4.05392	5.56665	5.54805	18896	62	438	8	1.82648	0.639835	818324|823741|823746|831267|836113|836894|837293|28719403	AT2G37470|HTB9|HTB11|CHC1|HTB4|TRB2|HTB1|AT3G53650	-3.56303	12	53	0	0	0	-6.79411	7.65415	0.335506
0	0	1	0	0	1	0	0	1	0	0	-3.29146	0	0	-2.58002	0	0	-3.675	GO:0006323	M001001001	3	0.296379	GO Biological Processes	19	DNA packaging	19_GO:0071840 cellular component organization or biogenesis	-3.51056	2.57058	4.1379	18896	62	1897	16	0.843437	0.209968	816467|817612|818324|823741|823746|828637|828717|830336|836113|836894|837187|837293|838462|841418|842992|28719403	NAP1;2|AT2G30620|AT2G37470|HTB9|HTB11|FKBP53|NAP1;1|SIR|HTB4|TRB2|AT1G06760|HTB1|NRP2|TRB1|SGA2|AT3G53650	-3.09736	6	53	0	0	0	-6.79411	7.65415	0.335506
0	0	1	0	1	1	1	0	1	0	0	-3.79499	0	-2.53271	-3.25719	-2.02579	0	-4.02101	GO:0031497	M001011101	5	0.300151	GO Biological Processes	19	chromatin assembly	19_GO:0071840 cellular component organization or biogenesis	-4.01488	2.9297	4.6097	18896	51	1897	15	0.790722	0.203355	816467|817612|818324|823741|823746|828637|828717|836113|836894|837187|837293|838462|841418|842992|28719403	NAP1;2|AT2G30620|AT2G37470|HTB9|HTB11|FKBP53|NAP1;1|HTB4|TRB2|AT1G06760|HTB1|NRP2|TRB1|SGA2|AT3G53650	-3.53001	6	53	0	0	0	-6.79411	7.65415	0.335506
0	0	1	0	1	1	1	0	1	0	0	-3.75373	0	-2.88746	-3.64016	-2.27317	0	-4.53381	GO:0006334	M001011101	5	0.311538	GO Biological Processes	19	nucleosome assembly	19_GO:0071840 cellular component organization or biogenesis	-4.59963	3.24815	5.09969	18896	46	1897	15	0.790722	0.203355	816467|817612|818324|823741|823746|828637|828717|836113|836894|837187|837293|838462|841418|842992|28719403	NAP1;2|AT2G30620|AT2G37470|HTB9|HTB11|FKBP53|NAP1;1|HTB4|TRB2|AT1G06760|HTB1|NRP2|TRB1|SGA2|AT3G53650	-4.03837	6	53	0	0	0	-6.79411	7.65415	0.335506
0	1	1	0	1	1	1	0	1	0	-3.48339	-5.54361	0	-2.88206	-4.38708	-3.88342	0	-6.2383	GO:0006333	M011011101	6	0.319984	GO Biological Processes	19	chromatin assembly or disassembly	19_GO:0071840 cellular component organization or biogenesis	-6.79411	7.65415	8.08416	18896	62	438	11	2.51142	0.747651	816263|818324|823741|823746|824351|829709|831267|836113|836894|837293|28719403	HMGB4|AT2G37470|HTB9|HTB11|HMGB1|HMGB5|CHC1|HTB4|TRB2|HTB1|AT3G53650	-6.00647	12	53	0	0	1	-6.79411	7.65415	0.335506
0	0	0	0	1	0	1	0	0	0	0	0	0	-3.3335	0	-4.8642	0	0	GO:0071369	M000010100	2	0.328373	GO Biological Processes	19	cellular response to ethylene stimulus	19_GO:0050896 response to stimulus	-2.02975	1.79939	2.69177	18896	88	2148	18	0.837989	0.196687	817087|820752|821575|821625|822041|823749|827463|827786|829335|832607|834509|834768|834770|839143|840115|841486|843685|843708	EBF1|ERF4|ERF7|EIN3|MBF1C|RABE1c|ERF6|LSD1|KNAT5|EBF2|RAN1|ERF2|ERF5|TEM1|RCD1|ERF3|MKK9|EIL3	-1.85438	5	54	0	0	0	-2.59579	6.66584	0.342992
0	0	0	0	1	0	1	0	0	0	0	0	0	-3.2484	0	-5.32167	0	0	GO:0009873	M000010100	2	0.342992	GO Biological Processes	19	ethylene-activated signaling pathway	19_GO:0023052 signaling	-2.11212	2.79801	3.10197	18896	81	667	8	1.1994	0.421501	817087|820752|821625|823749|832607|834768|840115|841486	EBF1|ERF4|EIN3|RABE1c|EBF2|ERF2|RCD1|ERF3	-1.92333	10	54	1	1	0	-2.59579	6.66584	0.342992
0	0	0	0	0	0	1	0	0	0	0	0	0	0	0	-2.15131	0	0	GO:0070298	M000000100	1	0.100813	GO Biological Processes	19	negative regulation of phosphorelay signal transduction system	19_GO:0048519 negative regulation of biological process	-2.59579	6.66584	4.47048	18896	17	667	4	0.5997	0.29895	817087|820752|832607|841486	EBF1|ERF4|EBF2|ERF3	-2.32912	10	54	0	0	0	-2.59579	6.66584	0.342992
0	0	0	0	0	0	1	0	0	0	0	0	0	0	0	-2.15131	0	0	GO:0010105	M000000100	1	0.100813	GO Biological Processes	19	negative regulation of ethylene-activated signaling pathway	19_GO:0048519 negative regulation of biological process	-2.59579	6.66584	4.47048	18896	17	667	4	0.5997	0.29895	817087|820752|832607|841486	EBF1|ERF4|EBF2|ERF3	-2.32912	10	54	0	0	1	-2.59579	6.66584	0.342992
0	1	1	0	1	0	0	0	1	0	-2.5213	-3.24693	0	-2.46873	0	0	0	-3.04478	ath04146	M011010001	4	0.267967	KEGG Pathway	24	Peroxisome		-6.4819	4.04712	6.61208	18896	87	966	18	1.86335	0.435086	814677|817876|818584|819945|820263|820462|821248|824347|827381|828484|828613|829661|831928|832820|836402|836635|838652|842905	PAHX|PKT3|PXN|PEX13|MSD1|SDRB|PEX19-1|ACX4|ACX1|LACS4|FSD1|CAT2|CSD3|LACS7|PEX14|ACX2|CAT1|cICDH	-5.72563	9	55	1	1	1	-6.4819	4.04712	0.267967
0	1	1	0	1	0	0	0	1	0	-2.5213	-3.24693	0	-2.46873	0	0	0	-3.04478	ko04146	M011010001	4	0.267967	KEGG Pathway	24	Peroxisome		-6.4819	4.04712	6.61208	18896	87	966	18	1.86335	0.435086	814677|817876|818584|819945|820263|820462|821248|824347|827381|828484|828613|829661|831928|832820|836402|836635|838652|842905	PAHX|PKT3|PXN|PEX13|MSD1|SDRB|PEX19-1|ACX4|ACX1|LACS4|FSD1|CAT2|CSD3|LACS7|PEX14|ACX2|CAT1|cICDH	-5.72563	9	55	0	0	0	-6.4819	4.04712	0.267967
0	0	0	0	1	0	0	0	0	0	0	0	0	-2.72869	0	0	0	0	ath00640	M000010000	1	0.143225	KEGG Pathway	24	Propanoate metabolism		-2.99766	3.7273	4.13573	18896	33	1229	8	0.650936	0.22939	816561|819865|820547|820951|830726|833497|838739|844755	AT2G20420|IBR3|DIN4|LPD1|AT5G08300|CAC2|AT1G21400|accD	-2.66356	8	56	0	0	0	-4.48315	6.72661	0.346964
0	0	0	0	1	0	0	0	0	0	0	0	0	-2.72869	0	0	0	0	ko00640	M000010000	1	0.143225	KEGG Pathway	24	Propanoate metabolism		-2.99766	3.7273	4.13573	18896	33	1229	8	0.650936	0.22939	816561|819865|820547|820951|830726|833497|838739|844755	AT2G20420|IBR3|DIN4|LPD1|AT5G08300|CAC2|AT1G21400|accD	-2.66356	8	56	0	0	0	-4.48315	6.72661	0.346964
0	0	0	0	1	0	0	0	1	0	0	0	0	-2.2589	0	0	0	-2.57534	ko00280	M000010001	2	0.189245	KEGG Pathway	24	Valine, leucine and isoleucine degradation		-3.77753	3.59843	4.70417	18896	47	1229	11	0.895037	0.268653	817876|818421|819865|820547|820951|823668|823955|824130|829573|838739|841849	PKT3|AGT3|IBR3|DIN4|LPD1|IVD|ALDH2B4|BCAT3|ALDH3I1|AT1G21400|ALDH7B4	-3.32486	8	56	0	0	0	-4.48315	6.72661	0.346964
0	0	0	0	1	0	0	0	1	0	0	0	0	-3.22271	0	0	0	-3.07566	GO:0045240	M000010001	2	0.252626	GO Cellular Components	20	dihydrolipoyl dehydrogenase complex		-2.55447	4.52772	3.90956	18896	11	1897	5	0.263574	0.117718	820547|824707|828798|835598|838739	DIN4|AT3G55410|AT4G26910|AT5G55070|AT1G21400	-2.29498	6	56	0	0	0	-4.48315	6.72661	0.346964
0	0	0	0	1	0	0	0	1	0	0	0	0	-2.2589	0	0	0	-2.57534	ath00280	M000010001	2	0.189245	KEGG Pathway	24	Valine, leucine and isoleucine degradation		-3.77753	3.59843	4.70417	18896	47	1229	11	0.895037	0.268653	817876|818421|819865|820547|820951|823668|823955|824130|829573|838739|841849	PKT3|AGT3|IBR3|DIN4|LPD1|IVD|ALDH2B4|BCAT3|ALDH3I1|AT1G21400|ALDH7B4	-3.32486	8	56	0	0	0	-4.48315	6.72661	0.346964
0	0	1	0	1	0	0	0	1	0	0	-3.17036	0	-3.24356	0	0	0	-5.04823	GO:0045239	M001010001	3	0.346964	GO Cellular Components	20	tricarboxylic acid cycle enzyme complex		-4.48315	6.72661	6.044	18896	16	1229	7	0.569569	0.214663	816561|819364|820547|824707|830726|835598|838739	AT2G20420|FUM1|DIN4|AT3G55410|AT5G08300|AT5G55070|AT1G21400	-3.93595	8	56	1	1	1	-4.48315	6.72661	0.346964
0	0	1	0	0	0	0	0	1	0	0	-3.25555	0	0	0	0	0	-3.78308	GO:0080024	M001000001	2	0.283329	GO Biological Processes	19	indolebutyric acid metabolic process	19_GO:0065007 biological regulation	-2.87976	6.10287	4.43236	18896	5	2477	4	0.161486	0.0806776	825905|827088|832812|837075	IBR1|IBR10|PNC2|UGT74E2	-2.56841	4	57	1	1	1	-2.87976	6.10287	0.283329
0	0	0	0	1	0	1	1	1	0	0	0	0	-2.36703	0	-3.34815	-3.23208	-3.0401	GO:0042542	M000010111	4	0.281727	GO Biological Processes	19	response to hydrogen peroxide	19_GO:0050896 response to stimulus	-5.6669	3.49164	5.88547	18896	71	1372	18	1.31195	0.307195	818982|819567|820264|823994|826515|827039|829661|829915|830424|831720|833755|834313|836437|838544|838652|840115|843864|844047	MPK6|GAPC1|AT3G10930|BT2|NDPK1|SBP1|CAT2|BT5|DREB2A|FER1|TCH2|TRX3|BT1|DHAR1|CAT1|RCD1|DHAR2|ADH1	-4.98534	7	58	0	0	0	-22.4181	3.49164	0.291896
1	1	1	1	1	1	1	1	1	-10.988	-9.9022	-2.80186	-5.44338	-8.47403	-8.74561	-10.8134	-5.44119	-7.19198	GO:0006979	M111111111	9	0.188892	GO Biological Processes	19	response to oxidative stress	19_GO:0050896 response to stimulus	-22.4181	2.56989	11.5007	18896	469	1897	121	6.37849	0.561065	814643|815120|815160|816149|816248|816478|817046|817494|817715|818116|818280|818531|818562|818588|818982|819244|819364|819567|819778|819961|820263|820264|820406|820628|820775|821104|821784|821807|822119|822139|822462|822833|823994|824493|824566|824694|824712|824775|825376|825452|825653|825817|826213|826515|826702|826730|826765|826884|827039|827412|827463|827786|828053|828130|828274|828409|828418|…	PDE345|ACO3|OPR3|ADC1|NTRA|ACO1|GPX1|GSTU5|GPX2|SRO1|PAL1|RPL23AA|CYT1|HSPRO2|MPK6|JAR1|FUM1|GAPC1|PRXIIF|AT3G07700|MSD1|AT3G10930|AT3G12260|FLU|TRX-M4|AT3G03100|POP2|TIC|AGC2-1|GLYR1|GATL10|ERD5|BT2|PAL2|AT3G53990|RPL23AB|SCL30|FER3|ROC4|AtATG18a|ATHM2|MSRB3|ATOZI1|NDPK1|NDPK3|ACS6|GPX6|NUDT7|SBP1|CLPR4|ERF6|LSD1|SAG21|AT4G02580|MSRB2|GSH1|CRK11|ATR1|FSD1|ACO2|ADC2|APX3|CAT2|BT5|DREB2A|AT5G08670…	-20.6922	6	58	0	0	1	-22.4181	3.49164	0.291896
1	1	0	1	1	1	1	1	1	-7.52493	-7.2957	0	-2.1446	-5.65354	-2.49459	-6.0341	-2.40248	-5.01909	GO:0000302	M110111111	8	0.291896	GO Biological Processes	19	response to reactive oxygen species	19_GO:0050896 response to stimulus	-14.1802	3.18032	9.42541	18896	166	1897	53	2.79389	0.378371	815160|816248|816478|818562|818982|819244|819567|819961|820263|820264|820628|823994|824775|826213|826515|826884|827039|827412|827463|827786|828053|828409|828613|829652|829661|829915|830424|831209|831508|831720|831928|832195|832820|833755|834077|834244|834313|836437|836451|836884|837304|837405|837708|838122|838483|838544|838652|840115|840318|841564|843389|843864|844047	OPR3|NTRA|ACO1|CYT1|MPK6|JAR1|GAPC1|AT3G07700|MSD1|AT3G10930|FLU|BT2|FER3|ATOZI1|NDPK1|NUDT7|SBP1|CLPR4|ERF6|LSD1|SAG21|GSH1|FSD1|APX3|CAT2|BT5|DREB2A|SVR3|AT5G16470|FER1|CSD3|CPN20|LACS7|TCH2|PHB3|CML37|TRX3|BT1|NDPK2|BT4|APX1|CSD1|RBP45B|ABCG40|AT1G19020|DHAR1|CAT1|RCD1|NAC017|AT1G51400|CRK2|DHAR2|ADH1	-12.8235	6	58	1	1	0	-22.4181	3.49164	0.291896
1	1	0	0	1	1	1	1	1	-14.2813	-6.13092	0	0	-6.62564	-5.75626	-12.3488	-5.42768	-5.88487	GO:0009409	M110011111	7	0.341921	GO Biological Processes	19	response to cold	19_GO:0050896 response to stimulus	-15.0935	2.20436	9.05792	18896	431	2148	108	5.02793	0.471493	814873|815055|816149|816293|816464|816633|816986|817244|817318|817575|817901|818213|818226|818353|818354|818429|818531|818558|818605|818982|819296|819353|819386|819757|820020|820288|820609|821806|823906|823994|824115|824261|824379|824514|824566|824694|825291|825331|825414|825817|826551|826594|826716|827773|827786|827931|828053|828151|828598|828651|828714|829269|829623|829661|829697|829733|829758|…	NRP1|LHCB2.2|ADC1|ERD7|TAG1|SYTA|FZF|PAG1|AT2G27720|WRKY25|RD20|GRF3|LOS2|AKR4C8|ChlAKR|WRKY33|RPL23AA|RCA|CZF1|MPK6|CCA1|CP12-1|GSTF8|RCI2A|PK1|FAD7|GRF5|AOX1A|MDH|BT2|NAC062|LTI30|PSRP2|CP29|AT3G53990|RPL23AB|BAP1|SLD1|CP12-2|MSRB3|ATPD|AT4G10030|TUF|PCAP1|LSD1|GSTF2|SAG21|MPK4|HVA22D|CBF2|ABI1|AT4G31420|ADC2|CAT2|AKR2|PLDDELTA|CSDP1|BT5|SHM1|GRP2|PLAT1|SIR|CYS1|SVR3|VDAC3|KIN2|FER1|BCB|CPN20|T…	-13.6773	5	59	0	0	0	-19.2442	2.20436	0.433098
1	1	1	0	1	1	1	1	1	-14.0291	-5.68198	-2.96489	0	-7.19568	-10.2927	-15.8998	-4.31488	-6.40519	GO:0009266	M111011111	8	0.348364	GO Biological Processes	19	response to temperature stimulus	19_GO:0050896 response to stimulus	-19.2442	2.09197	10.1944	18896	656	2148	156	7.26257	0.559958	814873|815055|816149|816293|816464|816633|816768|816986|817244|817318|817575|817901|818213|818226|818353|818354|818429|818531|818558|818562|818605|818627|818709|818982|819296|819353|819386|819567|819757|819925|820020|820091|820249|820288|820482|820609|821056|821447|821806|822041|822117|823531|823906|823994|824115|824261|824379|824514|824566|824694|824944|824945|825291|825331|825414|825817|826551|…	NRP1|LHCB2.2|ADC1|ERD7|TAG1|SYTA|AT2G22360|FZF|PAG1|AT2G27720|WRKY25|RD20|GRF3|LOS2|AKR4C8|ChlAKR|WRKY33|RPL23AA|RCA|CYT1|CZF1|DREB2C|TCH3|MPK6|CCA1|CP12-1|GSTF8|GAPC1|RCI2A|CHIP|PK1|Fes1A|BZIP28|FAD7|SMP1|GRF5|TDX|RBP47B|AOX1A|MBF1C|ROF1|J3|MDH|BT2|NAC062|LTI30|PSRP2|CP29|AT3G53990|RPL23AB|AT3G57750|AT3G57760|BAP1|SLD1|CP12-2|MSRB3|ATPD|AT4G10030|TUF|SGT1B|Hop3|HSBP|PCAP1|LSD1|GSTF2|SAG21|MPK4|G…	-17.5956	5	59	0	0	1	-19.2442	2.20436	0.433098
1	0	1	0	0	1	1	0	1	-2.36032	0	-3.29772	0	0	-7.33725	-8.58658	0	-3.95216	GO:0009408	M101001101	5	0.433098	GO Biological Processes	19	response to heat	19_GO:0050896 response to stimulus	-8.57099	2.05851	6.57033	18896	252	2477	68	2.74526	0.32831	814873|816276|816768|817575|817925|818429|818562|818627|819353|819567|820091|820249|820482|821056|821447|822041|822117|823531|823942|824566|825291|825414|826728|826849|827119|827261|828409|828714|828791|828792|829025|829853|830015|830019|830424|830626|830853|831087|831398|831565|832267|833755|834313|834417|834610|834842|834913|835379|835421|835609|835701|835809|835860|836103|836163|836300|836360|…	NRP1|SDC|AT2G22360|WRKY25|CRL1|WRKY33|CYT1|DREB2C|CP12-1|GAPC1|Fes1A|BZIP28|SMP1|TDX|RBP47B|MBF1C|ROF1|J3|CHL|AT3G53990|BAP1|CP12-2|SGT1B|Hop3|ELIP2|HSBP|GSH1|ABI1|SUMO1|VTC2|RPT2a|HSF4|FP6|RPN10|DREB2A|Tudor1|NRPB4|CYS1|CLPB3|XPO1A|J2|TCH2|TRX3|HOT5|RHA1|RBOHD|AT5G48570|TAP46|BOB1|SUMO2|HSP81-2|ABI2|TCH4|RHL41|SIZ1|Tudor2|BAG7|POM1|APX1|CPN10|ABCG40|COR47|VOZ1|RBP47A|AT1G56300|RPN12a|CP12-3|ALDH…	-7.64863	4	59	1	1	0	-19.2442	2.20436	0.433098
1	1	1	0	1	1	1	1	1	-6.19198	-9.38526	-8.07908	0	-6.25197	-5.34472	-2.51173	-4.39275	-13.1396	GO:0005777	M111011111	8	0.305755	GO Cellular Components	20	peroxisome		-17.3184	2.66648	10.1232	18896	325	1897	87	4.58619	0.480284	815160|815898|816808|817163|817170|817195|817244|817245|817306|817318|817319|817332|817429|817494|817502|817520|817546|817562|817599|817636|817637|817646|817648|817697|817715|817738|817746|817876|818584|818879|819056|819182|819870|819945|820118|820462|820664|821248|822003|822402|824347|824454|824670|824813|824816|824876|825044|825074|826213|826515|827088|827145|827314|827381|828063|829022|829652|…	OPR3|DRP3B|PMDH1|AT2G26230|GP ALPHA 1|HEMD|PAG1|CAM5|SKD1|AT2G27720|AT2G27730|AXS1|ALB3|GSTU5|TIM10|PH1|CYP5|UBA1|C4H|GSTF9|GSTF10|VAR2|ASP1|AT2G31390|GPX2|AT2G31810|SOBIR1|PKT3|PXN|CSY3|PEN2|PEX11D|MFP2|PEX13|SOX|SDRB|GOX2|PEX19-1|GR1|MDAR4|ACX4|MDAR1|GSTL2|AT3G56460|HIT3|BIGYIN|CSY2|PAO3|ATOZI1|NDPK1|IBR10|OASA1|ECHIA|ACX1|AT4G02340|AIM1|APX3|CAT2|ABCD1|PMDH2|ASP3|FIS1B|CSD3|MIA40|EMB2024|TGG1|…	-15.7524	6	60	1	1	1	-17.3184	2.66648	0.305755
1	1	1	0	1	1	1	1	1	-6.19198	-9.38526	-8.07908	0	-6.25197	-5.34472	-2.51173	-4.39275	-13.1396	GO:0042579	M111011111	8	0.305755	GO Cellular Components	20	microbody		-17.3184	2.66648	10.1232	18896	325	1897	87	4.58619	0.480284	815160|815898|816808|817163|817170|817195|817244|817245|817306|817318|817319|817332|817429|817494|817502|817520|817546|817562|817599|817636|817637|817646|817648|817697|817715|817738|817746|817876|818584|818879|819056|819182|819870|819945|820118|820462|820664|821248|822003|822402|824347|824454|824670|824813|824816|824876|825044|825074|826213|826515|827088|827145|827314|827381|828063|829022|829652|…	OPR3|DRP3B|PMDH1|AT2G26230|GP ALPHA 1|HEMD|PAG1|CAM5|SKD1|AT2G27720|AT2G27730|AXS1|ALB3|GSTU5|TIM10|PH1|CYP5|UBA1|C4H|GSTF9|GSTF10|VAR2|ASP1|AT2G31390|GPX2|AT2G31810|SOBIR1|PKT3|PXN|CSY3|PEN2|PEX11D|MFP2|PEX13|SOX|SDRB|GOX2|PEX19-1|GR1|MDAR4|ACX4|MDAR1|GSTL2|AT3G56460|HIT3|BIGYIN|CSY2|PAO3|ATOZI1|NDPK1|IBR10|OASA1|ECHIA|ACX1|AT4G02340|AIM1|APX3|CAT2|ABCD1|PMDH2|ASP3|FIS1B|CSD3|MIA40|EMB2024|TGG1|…	-15.7524	6	60	0	0	0	-17.3184	2.66648	0.305755
0	0	0	1	0	0	0	0	1	0	0	0	-2.11224	0	0	0	0	-2.37587	GO:0005375	M000100001	2	0.171002	GO Molecular Functions	21	copper ion transmembrane transporter activity		-2.81284	7.55462	4.85776	18896	15	667	4	0.5997	0.29895	817239|829490|832188|836020	COPT6|PAA1|COPT5|COPT1	-2.51206	10	61	0	0	0	-4.30574	16.1885	0.267493
0	0	1	0	0	0	0	0	0	0	0	-2.09129	0	0	0	0	0	0	GO:0055070	M001000000	1	0.0961261	GO Biological Processes	19	copper ion homeostasis	19_GO:0065007 biological regulation	-2.49882	6.29552	4.29954	18896	18	667	4	0.5997	0.29895	817239|829490|832188|836020	COPT6|PAA1|COPT5|COPT1	-2.24573	10	61	0	0	0	-4.30574	16.1885	0.267493
0	0	1	1	0	0	0	1	1	0	0	-2.2226	-2.95865	0	0	0	-2.73351	-2.71916	GO:0006825	M001100011	4	0.251534	GO Biological Processes	19	copper ion transport	19_GO:0051179 localization	-4.01704	14.1649	7.12402	18896	8	667	4	0.5997	0.29895	817239|829490|832188|836020	COPT6|PAA1|COPT5|COPT1	-3.5318	10	61	0	0	0	-4.30574	16.1885	0.267493
0	0	1	1	0	0	0	1	1	0	0	-2.48606	-3.15365	0	0	0	-2.92671	-2.99287	GO:0035434	M001100011	4	0.267493	GO Biological Processes	19	copper ion transmembrane transport	19_GO:0051179 localization	-4.30574	16.1885	7.68801	18896	7	667	4	0.5997	0.29895	817239|829490|832188|836020	COPT6|PAA1|COPT5|COPT1	-3.78232	10	61	1	1	1	-4.30574	16.1885	0.267493
0	0	0	1	0	0	0	1	0	0	0	0	-2.40073	0	0	0	-2.18279	0	GO:0006878	M000100010	2	0.175561	GO Biological Processes	19	cellular copper ion homeostasis	19_GO:0065007 biological regulation	-2.11985	7.08246	4.0316	18896	12	667	3	0.449775	0.259093	817239|832188|836020	COPT6|COPT5|COPT1	-1.92942	10	61	0	0	0	-4.30574	16.1885	0.267493
0	0	0	0	0	0	1	0	1	0	0	0	0	0	0	-2.73425	0	-2.41683	GO:0005543	M000000101	2	0.2046	GO Molecular Functions	21	phospholipid binding		-3.37998	1.97755	3.82197	18896	136	1897	27	1.4233	0.271958	816633|817081|817520|817721|817786|817912|818034|820816|821453|822117|822552|823398|825291|825452|827179|827773|827864|830501|833474|833752|833953|836673|837637|838320|840069|842385|842466	SYTA|AT2G25430|PH1|ATX1|CCT1|GLTP1|ACD11|PLDALPHA1|ATG2|ROF1|AT3G29075|AT3G43230|BAP1|AtATG18a|CCT2|PCAP1|ZAC|SNX1|AT5G35200|AT5G37740|AT5G39570|AT5G65480|SNRK2.4|DRG1|ACBP6|SNRK2.10|AT1G61690	-2.98722	6	62	0	0	1	-3.37998	1.97755	0.300891
0	0	0	0	0	0	1	0	1	0	0	0	0	0	0	-2.53396	0	-4.65126	GO:0008289	M000000101	2	0.300891	GO Molecular Functions	21	lipid binding		-2.77998	1.55043	3.20678	18896	261	2148	46	2.14153	0.312352	816633|817081|817520|817721|817786|817912|818034|818411|820352|820606|820816|821453|822117|822552|823398|823481|823530|825277|825291|825452|825476|827179|827381|827773|827864|827923|829697|830427|830501|833474|833752|833953|835300|835397|836061|836635|836673|837637|838320|839688|840069|841033|842385|842458|842466|10723114	SYTA|AT2G25430|PH1|ATX1|CCT1|GLTP1|ACD11|PYL4|AT3G11780|AT3G13930|PLDALPHA1|ATG2|ROF1|AT3G29075|AT3G43230|LTPG2|AT3G44100|NTMC2T4|BAP1|AtATG18a|GID1B|CCT2|ACX1|PCAP1|ZAC|PYL7|AKR2|PYL5|SNX1|AT5G35200|AT5G37740|AT5G39570|MSBP1|RCAR3|ORP3C|ACX2|AT5G65480|SNRK2.4|DRG1|LTPG1|ACBP6|NPQ4|SNRK2.10|AT1G61620|AT1G61690|SPHK2	-2.48333	5	62	1	1	0	-3.37998	1.97755	0.300891
0	0	0	0	0	0	0	1	0	0	0	0	0	0	0	0	-2.54803	0	GO:0055088	M000000010	1	0.130453	GO Biological Processes	19	lipid homeostasis	19_GO:0065007 biological regulation	-3.40198	8.00746	5.57615	18896	57	207	5	2.41546	1.0671	826595|827381|836635|838889|839331	CYTC-2|ACX1|ACX2|CYTC-1|AT1G01230	-3.00445	14	63	0	0	0	-8.06002	21.5708	0.428125
0	1	0	0	0	1	0	0	1	0	-2.22306	0	0	0	-2.47995	0	0	-2.1165	GO:0019646	M010001001	3	0.20493	GO Biological Processes	19	aerobic electron transport chain	19_GO:0008152 metabolic process	-3.62924	21.5708	7.76298	18896	6	438	3	0.684932	0.394089	826595|829939|838889	CYTC-2|AT4G37830|CYTC-1	-3.19911	12	63	0	0	0	-8.06002	21.5708	0.428125
0	1	0	0	0	1	0	0	1	0	-2.22306	0	0	0	-2.47995	0	0	-2.1165	GO:0006123	M010001001	3	0.20493	GO Biological Processes	19	mitochondrial electron transport, cytochrome c to oxygen	19_GO:0008152 metabolic process	-3.62924	21.5708	7.76298	18896	6	438	3	0.684932	0.394089	826595|829939|838889	CYTC-2|AT4G37830|CYTC-1	-3.19911	12	63	0	0	0	-8.06002	21.5708	0.428125
0	1	1	0	0	1	0	0	0	0	-2.1105	-2.27266	0	0	-3.45751	0	0	0	GO:0006122	M011001000	3	0.254789	GO Biological Processes	19	mitochondrial electron transport, ubiquinol to cytochrome c	19_GO:0008152 metabolic process	-3.91508	14.3805	7.14224	18896	12	438	4	0.913242	0.454531	824439|826595|838075|838889	AT3G52730|CYTC-2|AT1G15120|CYTC-1	-3.44324	12	63	0	0	0	-8.06002	21.5708	0.428125
0	1	1	0	0	1	1	0	1	0	-7.7905	-7.3559	0	0	-6.00884	-2.25158	0	-3.07341	GO:0031970	M011001101	5	0.425199	GO Cellular Components	20	organelle envelope lumen		-7.72122	11.0031	9.29107	18896	16	966	9	0.931677	0.309109	817502|821084|823809|825844|826595|831146|835153|838889|842453	TIM10|MPPBETA|TIM9|NDB2|CYTC-2|AT5G13070|TIM8|CYTC-1|TIM13	-6.86336	9	63	0	0	0	-8.06002	21.5708	0.428125
0	1	1	0	0	1	1	0	1	0	-8.18793	-6.53598	0	0	-6.28738	-2.36026	0	-2.37587	GO:0005758	M011001101	5	0.428125	GO Cellular Components	20	mitochondrial intermembrane space		-8.06002	11.7366	9.65547	18896	15	966	9	0.931677	0.309109	817502|821084|823809|825844|826595|831146|835153|838889|842453	TIM10|MPPBETA|TIM9|NDB2|CYTC-2|AT5G13070|TIM8|CYTC-1|TIM13	-7.17376	9	63	1	1	1	-8.06002	21.5708	0.428125
0	0	0	0	0	0	0	1	0	0	0	0	0	0	0	0	-2.20278	0	GO:0015662	M000000010	1	0.104789	GO Molecular Functions	21	ATPase activity, coupled to transmembrane movement of ions, phosphorylative mechanism		-2.23046	4.31416	3.61465	18896	50	438	5	1.14155	0.507596	816413|825513|826716|829142|829490	HA1|AT3G63380|TUF|HA2|PAA1	-2.02222	12	64	0	0	0	-2.30759	4.31416	0.119994
0	0	0	0	0	0	0	1	0	0	0	0	0	0	0	0	-2.40454	0	GO:0008553	M000000010	1	0.119994	GO Molecular Functions	21	proton-exporting ATPase activity, phosphorylative mechanism		-2.30759	3.07896	3.33131	18896	20	2148	7	0.325885	0.122972	816413|816988|820003|826716|829142|837280|842725	HA1|HA5|VHA-E2|TUF|HA2|ECA4|VHA-E3	-2.0854	5	64	1	1	1	-2.30759	4.31416	0.119994
1	1	0	0	1	0	0	0	1	-7.75006	-4.10201	0	0	-3.02111	0	0	0	-3.646	ko00620	M110010001	4	0.41214	KEGG Pathway	24	Pyruvate metabolism		-11.7229	3.86721	8.8503	18896	85	1897	33	1.73959	0.300178	816808|817693|818231|818382|818860|819364|820255|820606|820875|820951|821870|823906|823955|824465|827226|829573|830825|831039|833497|835369|835735|835945|836488|837330|839031|839429|840346|841757|841849|842284|843048|844314|844755	PMDH1|GLX2-5|AT2G36580|CAC3|PPC2|FUM1|GLY2|AT3G13930|DJ1D|LPD1|PKP-ALPHA|MDH|ALDH2B4|AT3G52990|PPDK|ALDH3I1|PMDH2|NADP-ME2|CAC2|PKP-BETA1|AT5G56350|AT5G58330|AT5G63680|AT1G08110|IAR4|PDH-E1 ALPHA|EMB3003|mMDH1|ALDH7B4|E1 ALPHA|AT1G67280|NADP-ME4|accD	-10.5727	6	65	0	0	0	-11.7229	3.86721	0.41214
1	1	0	0	1	0	0	0	1	-7.75006	-4.10201	0	0	-3.02111	0	0	0	-3.646	ath00620	M110010001	4	0.41214	KEGG Pathway	24	Pyruvate metabolism		-11.7229	3.86721	8.8503	18896	85	1897	33	1.73959	0.300178	816808|817693|818231|818382|818860|819364|820255|820606|820875|820951|821870|823906|823955|824465|827226|829573|830825|831039|833497|835369|835735|835945|836488|837330|839031|839429|840346|841757|841849|842284|843048|844314|844755	PMDH1|GLX2-5|AT2G36580|CAC3|PPC2|FUM1|GLY2|AT3G13930|DJ1D|LPD1|PKP-ALPHA|MDH|ALDH2B4|AT3G52990|PPDK|ALDH3I1|PMDH2|NADP-ME2|CAC2|PKP-BETA1|AT5G56350|AT5G58330|AT5G63680|AT1G08110|IAR4|PDH-E1 ALPHA|EMB3003|mMDH1|ALDH7B4|E1 ALPHA|AT1G67280|NADP-ME4|accD	-10.5727	6	65	1	1	1	-11.7229	3.86721	0.41214
0	0	1	0	1	0	0	1	0	0	0	-2.10065	0	-2.83037	0	0	-2.07967	0	GO:0031231	M001010010	3	0.218329	GO Cellular Components	20	intrinsic component of peroxisomal membrane		-3.02944	4.59738	4.33429	18896	13	1897	6	0.316289	0.12892	819182|824876|831114|832812|839257|841285	PEX11D|BIGYIN|FIS1B|PNC2|PEX11C|PEX3	-2.69029	6	66	0	0	0	-8.33307	4.71836	0.409763
0	0	1	0	1	0	0	1	0	0	0	-2.10065	0	-2.83037	0	0	-2.07967	0	GO:0005779	M001010010	3	0.218329	GO Cellular Components	20	integral component of peroxisomal membrane		-3.02944	4.59738	4.33429	18896	13	1897	6	0.316289	0.12892	819182|824876|831114|832812|839257|841285	PEX11D|BIGYIN|FIS1B|PNC2|PEX11C|PEX3	-2.69029	6	66	0	0	0	-8.33307	4.71836	0.409763
0	0	1	0	1	0	0	1	1	0	0	-2.93173	0	-3.52438	0	0	-2.40338	-4.80949	GO:0031903	M001010011	4	0.33422	GO Cellular Components	20	microbody membrane		-6.08234	4.35793	6.35076	18896	32	1897	14	0.738007	0.196512	818584|819182|819945|821248|822402|824876|829652|830144|831114|832812|836402|839257|841285|843982	PXN|PEX11D|PEX13|PEX19-1|MDAR4|BIGYIN|APX3|ABCD1|FIS1B|PNC2|PEX14|PEX11C|PEX3|HMG1	-5.36054	6	66	0	0	0	-8.33307	4.71836	0.409763
0	0	1	0	1	0	0	1	1	0	0	-2.93173	0	-3.52438	0	0	-2.40338	-4.80949	GO:0005778	M001010011	4	0.33422	GO Cellular Components	20	peroxisomal membrane		-6.08234	4.35793	6.35076	18896	32	1897	14	0.738007	0.196512	818584|819182|819945|821248|822402|824876|829652|830144|831114|832812|836402|839257|841285|843982	PXN|PEX11D|PEX13|PEX19-1|MDAR4|BIGYIN|APX3|ABCD1|FIS1B|PNC2|PEX14|PEX11C|PEX3|HMG1	-5.36054	6	66	0	0	0	-8.33307	4.71836	0.409763
1	0	1	0	1	0	0	1	1	-2.03319	0	-3.58255	0	-4.43616	0	0	-2.87844	-4.89939	GO:0044439	M101010011	5	0.33542	GO Cellular Components	20	peroxisomal part		-7.65311	4.57667	7.27472	18896	37	1897	17	0.896152	0.216373	818584|819182|819945|821248|822402|824454|824876|829652|830144|831114|832812|834750|836402|839257|839800|841285|843982	PXN|PEX11D|PEX13|PEX19-1|MDAR4|MDAR1|BIGYIN|APX3|ABCD1|FIS1B|PNC2|LON2|PEX14|PEX11C|PEX7|PEX3|HMG1	-6.80284	6	66	0	0	0	-8.33307	4.71836	0.409763
0	0	0	0	1	0	0	0	0	0	0	0	0	-2.08996	0	0	0	0	GO:0016559	M000010000	1	0.0960218	GO Biological Processes	19	peroxisome fission	19_GO:0071840 cellular component organization or biogenesis	-2.3576	4.15041	3.64675	18896	12	1897	5	0.263574	0.117718	815898|819182|824876|831114|839257	DRP3B|PEX11D|BIGYIN|FIS1B|PEX11C	-2.12675	6	66	0	0	0	-8.33307	4.71836	0.409763
0	0	1	0	1	0	1	0	1	0	0	-5.53629	0	-6.78414	0	-2.75957	0	-3.33937	GO:0007031	M001010101	4	0.409763	GO Biological Processes	19	peroxisome organization	19_GO:0071840 cellular component organization or biogenesis	-8.33307	4.71836	7.66463	18896	38	1897	18	0.948867	0.222586	814673|815898|817163|817876|819182|819945|821248|821741|824876|831114|832404|832645|832812|834750|836402|839257|839800|841285	MPK17|DRP3B|AT2G26230|PKT3|PEX11D|PEX13|PEX19-1|PEX22|BIGYIN|FIS1B|MIA40|PEX4|PNC2|LON2|PEX14|PEX11C|PEX7|PEX3	-7.42307	6	66	1	1	1	-8.33307	4.71836	0.409763
[truncated: 831 more rows]

## Sheet: Table S3
Table S3. List of mutant lines used in the study.
Gene name	Accession number	Mutant lines
bZIP25	AT3G54620	SALK_119931，SALK_148423
bZIP53	AT3G62420	SALK_069883，SALK_078494

## Sheet: Table S4
Table S4. List of oligonucleotide primer pairs used in the study.
Gene	Name	Sequence (5' - 3')	Analysis purpose
[truncated: 102 more rows]
